# Supplementary material for: Injection with Toxoplasma gondii protein affects neuron health and survival
Source: eLife. 2021 Jun 9;10:e67681. doi: 10.7554/eLife.67681 (PMC8270641; doi:10.7554/eLife.67681)
Supplement: Figure 1—source data 1. [file elife-67681-fig1-data1.xlsx]

## Sheet: PcA
Input#OfMice	TOTAL	Average per mouse	InputMouse#1760	_1	_2	_3	_4	_5	_6	_7	_8	_9	_10	_11	_12	_13	_14	_15	_16	_17	_18	_19	_20	_21	TOTAL	InputMouse#1761	_1	_2	_3	_4	_5	_6	_7	_8	_9	_10	_11	_12	_13	_14	_15	_16	_17	_18	_19	_20	_21	TOTAL	InputMouse#1779
ACA	17	#VALUE!	ACA	0	0	0	0	0	0	0	0	0	0	0	0	0	0	0	0	0	0	0	0	0	0	ACA	0	0	0	0	0	0	0	0	0	0	0	0	0	0	0	0	0	0	0	0	0	0	ACA
AI	25	#VALUE!	AI	0	0	0	0	0	0	0	0	0	0	0	0	0	0	0	0	0	0	0	0	0	0	AI	0	0	0	0	0	0	0	0	0	0	0	0	0	0	0	0	0	0	0	0	0	0	AI
ECT	3	#VALUE!	ECT	0	0	0	0	0	0	0	0	0	0	0	0	0	0	0	0	0	0	0	0	0	0	ECT	0	0	0	0	0	0	0	0	0	0	0	0	0	0	0	0	0	0	0	0	0	0	ECT
FRP	18	#VALUE!	FRP	0	0	0	0	0	0	0	0	0	0	0	0	0	0	0	0	0	0	0	0	0	0	FRP	0	0	0	0	0	0	0	0	0	0	0	0	0	0	0	0	0	0	0	0	0	0	FRP
GU	4	#VALUE!	GU	0	0	0	0	0	0	0	0	0	0	0	0	0	0	0	0	0	0	0	0	0	0	GU	0	0	0	0	0	0	0	0	0	0	0	0	0	0	0	0	0	0	0	0	0	0	GU
ILA2/3	2	#VALUE!	ILA2/3	0	0	0	0	0	0	0	0	0	0	0	0	0	0	0	0	0	0	0	0	0	0	ILA2/3	0	0	0	0	0	0	0	0	0	0	0	0	0	0	0	0	0	0	0	0	0	0	ILA2/3
MO	222	#VALUE!	MO	0	0	0	0	0	0	0	0	0	0	0	2	0	0	0	0	0	0	0	0	0	2	MO	0	0	0	0	0	0	0	0	0	0	0	0	0	1	0	0	1	0	0	0	0	2	MO
ORB	66	#VALUE!	ORB	0	0	0	0	0	0	0	0	0	0	0	0	0	0	0	0	0	0	0	0	0	0	ORB	0	0	0	0	0	0	0	0	0	0	0	0	0	0	2	1	0	0	0	0	0	3	ORB
PL	4	#VALUE!	PL	0	0	0	0	0	0	0	0	0	0	0	0	0	0	0	0	0	0	0	0	0	0	PL	0	0	0	0	0	0	0	0	0	0	0	0	0	0	0	0	0	0	0	0	0	0	PL
PTLp	14	#VALUE!	PTLp	0	0	0	0	0	0	0	0	0	0	0	0	0	0	0	0	0	0	0	0	0	0	PTLp	0	0	0	0	0	0	0	0	0	0	0	0	0	0	0	0	0	0	0	0	0	0	PTLp
RSP	30	#VALUE!	RSP	0	0	0	0	0	0	0	0	0	0	0	0	0	0	0	0	0	0	0	0	0	0	RSP	0	0	0	0	0	0	0	0	1	0	0	0	0	0	0	1	0	0	1	0	0	3	RSP
SS	213	#VALUE!	SS	0	0	0	3	0	4	0	0	0	0	0	0	1	0	0	0	0	0	0	0	0	8	SS	0	0	0	0	0	0	0	0	0	0	0	0	0	0	0	0	0	0	0	0	0	0	SS
VIS	193	#VALUE!	VIS	0	0	0	0	0	0	1	0	4	3	0	0	0	0	0	0	0	0	0	0	0	8	VIS	0	0	0	0	1	0	1	0	0	0	0	0	0	0	1	0	0	0	0	0	0	3	VIS
VISC	4	#VALUE!	VISC	0	0	0	0	0	0	0	0	0	0	0	0	0	0	0	0	0	0	0	0	0	0	VISC	0	0	0	0	0	0	0	0	0	0	0	0	0	0	0	0	0	0	0	0	0	0	VISC
CP	418	#VALUE!	CP	0	0	0	0	2	0	1	0	0	0	0	0	0	0	0	0	0	0	0	0	0	3	CP	0	0	0	0	0	0	3	2	2	0	0	0	0	0	0	0	0	0	0	0	0	7	CP
LS	32	#VALUE!	LS	0	0	0	0	0	0	0	0	0	0	0	0	0	0	0	0	0	0	0	0	0	0	LS	0	0	0	0	0	0	0	0	0	0	0	0	0	0	0	0	0	0	0	0	0	0	LS
sAMY	23	#VALUE!	sAMY	0	0	0	0	0	0	0	0	0	0	0	0	0	0	0	0	0	0	0	0	0	0	sAMY	0	0	0	0	0	0	1	0	0	0	0	0	0	0	0	0	0	0	0	0	0	1	sAMY
STRv	125	#VALUE!	STRv	0	0	0	0	0	0	0	0	1	0	0	0	0	0	0	0	0	0	0	0	0	1	STRv	0	0	0	0	0	0	0	0	0	0	0	0	0	0	0	0	1	0	0	0	0	1	STRv
GP	36	#VALUE!	GP	0	0	0	0	0	0	0	0	0	0	0	0	0	0	0	0	0	0	0	0	0	0	GP	0	0	0	0	0	0	4	3	1	0	0	0	0	0	0	0	0	0	0	0	0	8	GP
PALc	19	#VALUE!	PALc	0	0	0	0	0	0	0	0	0	0	0	0	0	0	0	0	0	0	0	0	0	0	PALc	0	0	0	0	0	0	0	0	0	0	0	0	0	0	0	0	0	0	0	0	0	0	PALc
PALm	8	#VALUE!	PALm	0	0	0	0	0	0	0	0	0	0	0	0	0	0	0	0	0	0	0	0	0	0	PALm	0	0	0	0	0	0	0	0	0	0	0	0	0	0	0	0	0	0	0	0	0	0	PALm
PALv	46	#VALUE!	PALv	0	0	0	0	0	0	0	0	0	0	0	0	0	0	0	0	0	0	0	0	0	0	PALv	0	0	0	0	0	0	0	0	0	0	0	0	0	0	0	1	0	0	0	0	0	1	PALv
LZ/ME	210	#VALUE!	LZ/ME	0	0	0	0	0	0	0	0	0	0	0	0	0	1	0	0	0	0	0	0	0	1	LZ/ME	0	0	0	0	0	0	0	0	0	0	0	0	0	0	0	0	0	0	0	0	0	0	LZ/ME
MEZ	17	#VALUE!	MEZ	0	0	0	0	0	0	0	0	0	0	0	0	0	0	0	0	0	0	0	0	0	0	MEZ	0	0	0	0	0	0	0	0	0	0	0	0	0	0	0	0	0	0	0	0	0	0	MEZ
PVR	7	#VALUE!	PVR	0	0	0	0	0	0	0	0	0	0	0	0	0	0	0	0	0	0	0	0	0	0	PVR	0	0	0	0	0	0	0	0	0	0	0	0	0	0	0	0	0	0	0	0	0	0	PVR
PVZ	2	#VALUE!	PVZ	0	0	0	0	0	0	0	0	0	0	0	0	0	0	0	0	0	0	0	0	0	0	PVZ	0	0	0	0	0	0	0	0	0	0	0	0	0	0	0	0	2	0	0	0	0	2	PVZ
AOB-dark/ Nlot	4	#VALUE!	AOB-dark/ Nlot	0	0	0	0	0	0	0	0	0	0	0	0	0	0	0	0	0	0	0	0	0	0	AOB-dark/ Nlot	0	0	0	0	0	0	0	0	0	0	0	0	0	0	0	0	0	0	0	0	0	0	AOB-dark/ Nlot
AOB-light	1	#VALUE!	AOB-light	0	0	0	0	0	0	0	0	0	0	0	0	0	0	0	0	0	0	0	0	0	0	AOB-light	0	0	0	0	0	0	0	0	0	0	0	0	0	0	0	0	0	0	0	0	0	0	AOB-light
AON	46	#VALUE!	AON	0	0	0	0	0	0	0	0	0	0	0	0	0	0	0	0	0	0	0	0	0	0	AON	0	0	0	0	0	0	0	0	0	0	0	0	0	0	0	0	0	0	0	0	0	0	AON
COA	14	#VALUE!	COA	0	0	0	0	0	0	0	0	0	0	0	0	0	0	0	0	0	0	0	0	0	0	COA	0	0	0	0	0	0	0	0	0	0	0	0	0	0	0	0	0	0	0	0	0	0	COA
MOB-dark	75	#VALUE!	MOB-dark	0	0	0	0	0	0	0	0	0	0	0	0	0	0	0	0	0	0	0	0	0	0	MOB-dark	0	0	0	0	0	0	0	0	0	0	0	0	0	0	0	0	0	0	0	0	0	0	MOB-dark
MOB-light	34	#VALUE!	MOB-light	0	0	0	0	0	0	0	0	0	0	0	0	0	0	0	0	0	0	0	0	0	0	MOB-light	0	0	0	0	0	0	0	0	0	0	0	0	0	0	0	0	0	0	0	0	0	0	MOB-light
PAA	13	#VALUE!	PAA	0	0	0	0	0	0	0	0	0	0	0	0	0	0	0	0	0	0	0	0	0	0	PAA	0	0	0	0	0	0	0	0	0	0	0	0	0	0	0	0	0	0	0	0	0	0	PAA
PIR	59	#VALUE!	PIR	0	0	0	0	0	0	0	0	0	0	0	0	0	0	0	0	0	0	0	0	0	0	PIR	0	0	0	0	0	0	0	0	0	0	0	0	0	0	0	0	0	0	0	0	0	0	PIR
TR	2	#VALUE!	TR	0	0	0	0	0	0	0	0	0	0	0	0	0	0	0	0	0	0	0	0	0	0	TR	0	0	0	0	0	0	0	0	0	0	0	0	0	0	0	0	0	0	0	0	0	0	TR
TT	14	#VALUE!	TT	0	0	0	0	0	0	0	0	0	0	0	0	0	0	0	0	0	0	0	0	0	0	TT	0	0	0	0	0	0	0	0	0	0	0	0	0	0	0	0	0	0	0	0	0	0	TT
BLA	9	#VALUE!	BLA	0	0	0	0	0	0	0	0	0	0	0	0	0	0	0	0	0	0	0	0	0	0	BLA	0	0	0	0	0	0	0	0	0	0	0	0	0	0	0	0	0	0	0	0	0	0	BLA
BMA	10	#VALUE!	BMA	0	0	0	0	0	0	0	0	0	0	0	0	0	0	0	0	0	0	0	0	0	0	BMA	0	0	0	0	0	0	0	0	0	0	0	0	0	0	0	0	0	0	0	0	0	0	BMA
CLA	24	#VALUE!	CLA	0	0	0	0	0	0	0	0	0	0	0	0	0	0	0	0	0	0	0	0	0	0	CLA	0	0	0	0	0	0	0	0	0	0	0	0	0	0	0	0	0	0	0	0	0	0	CLA
EP	30	#VALUE!	EP	0	0	0	0	0	0	0	0	0	0	0	0	0	0	0	0	0	0	0	0	0	0	EP	0	0	0	0	0	0	0	0	0	0	0	0	0	0	0	0	0	0	0	0	0	0	EP
PA	1	#VALUE!	PA	0	0	0	0	0	0	0	0	0	0	0	0	0	0	0	0	0	0	0	0	0	0	PA	0	0	0	0	0	0	0	0	0	0	0	0	0	0	0	0	0	0	0	0	0	0	PA
DOR-pm	154	#VALUE!	DOR-pm	0	0	0	0	0	0	0	0	0	0	0	0	0	0	0	0	0	0	0	0	0	0	DOR-pm	0	0	0	0	0	0	0	0	0	0	0	0	1	0	0	0	0	0	0	0	0	1	DOR-pm
DOR-sm	44	#VALUE!	DOR-sm	0	0	0	0	0	0	0	0	0	0	0	0	0	0	0	0	0	0	0	0	0	0	DOR-sm	0	0	0	0	0	0	0	0	0	0	0	0	0	0	0	0	1	0	0	0	0	1	DOR-sm
LA	1	#VALUE!	LA	0	0	0	0	0	0	0	0	0	0	0	0	0	0	0	0	0	0	0	0	0	0	LA	0	0	0	0	0	0	0	0	0	0	0	0	0	0	0	0	0	0	0	0	0	0	LA
MB-mot	96	#VALUE!	MB-mot	0	0	0	0	0	0	0	0	0	0	0	0	0	0	0	0	0	0	0	0	0	0	MB-mot	0	0	0	0	0	0	0	0	0	0	0	0	0	0	0	0	0	0	0	0	0	0	MB-mot
MB-sen	26	#VALUE!	MB-sen	0	0	0	0	0	0	0	0	0	0	0	0	0	0	0	0	0	0	0	0	0	0	MB-sen	0	0	0	0	0	0	0	0	0	0	0	0	0	0	0	0	0	1	0	0	0	1	MB-sen
MB-sta	12	#VALUE!	MB-sta	0	0	0	0	0	0	0	0	0	0	0	0	0	0	0	0	0	0	0	0	0	0	MB-sta	0	0	0	0	0	0	0	0	0	0	0	0	0	0	0	0	0	0	0	0	0	0	MB-sta
ENT	74	#VALUE!	ENT	0	0	0	0	0	2	0	0	0	0	0	0	0	0	0	0	0	0	0	0	0	2	ENT	0	0	0	0	0	0	0	0	0	0	0	0	0	0	0	0	0	0	0	0	0	0	ENT
CA123_pyramidal/DG_granule	13	#VALUE!	CA123_pyramidal/DG_granule	0	0	0	0	0	2	0	0	0	0	0	0	0	0	0	0	0	0	0	0	0	2	CA123_pyramidal/DG_granule	0	0	0	0	0	0	0	0	0	0	0	0	0	0	0	0	0	0	0	0	0	0	CA123_pyramidal/DG_granule
CA123 / DG	42	#VALUE!	CA123 / DG	0	0	0	0	0	0	0	0	0	0	0	1	0	0	0	0	0	0	0	0	0	1	CA123 / DG	0	0	0	0	0	0	0	0	1	0	0	0	0	1	1	1	0	0	0	0	0	4	CA123 / DG
PAR	3	#VALUE!	PAR	0	0	0	0	0	0	0	0	0	0	0	0	0	0	0	0	0	0	0	0	0	0	PAR	0	0	0	0	0	0	0	0	0	0	0	0	0	0	0	0	0	0	0	0	0	0	PAR
POST	14	#VALUE!	POST	0	0	0	0	0	0	0	0	0	0	0	0	0	0	0	0	0	0	0	0	0	0	POST	0	0	0	0	0	0	0	0	2	0	0	0	0	0	0	0	0	0	0	0	0	2	POST
PRE	6	#VALUE!	PRE	0	0	0	0	0	0	0	0	0	0	0	0	0	0	0	0	0	0	0	0	0	0	PRE	0	0	0	0	0	0	0	0	0	0	0	0	0	0	0	0	0	0	0	0	0	0	PRE
SUB	45	#VALUE!	SUB	0	0	0	0	0	0	0	0	0	0	0	0	0	0	0	0	0	0	0	0	0	0	SUB	0	0	0	0	0	0	0	0	0	0	0	0	0	0	0	0	0	0	0	0	0	0	SUB
CBX-granular	62	#VALUE!	CBX-granular	0	0	0	0	0	0	0	0	0	0	0	0	0	0	0	0	0	0	0	0	0	0	CBX-granular	0	0	0	0	0	0	0	0	0	0	0	0	0	0	0	0	0	1	0	0	0	1	CBX-granular
CBX-molecular	70	#VALUE!	CBX-molecular	0	0	0	0	0	0	0	0	0	0	0	0	0	0	0	0	0	0	0	0	0	0	CBX-molecular	0	0	0	0	0	0	0	0	0	0	0	0	0	0	0	0	0	3	0	0	0	3	CBX-molecular
DN	2	#VALUE!	DN	0	0	0	0	0	0	0	0	0	0	0	0	0	0	0	0	0	0	0	0	0	0	DN	0	0	0	0	0	0	0	0	0	0	0	0	0	0	0	0	0	0	0	0	0	0	DN
P-mot	28	#VALUE!	P-mot	0	0	0	0	0	0	0	0	0	0	0	0	0	0	0	0	0	0	0	0	0	0	P-mot	0	0	0	0	0	0	0	0	0	0	0	0	0	1	1	0	0	0	0	0	0	2	P-mot
P-sat	28	#VALUE!	P-sat	0	0	0	0	0	0	0	0	0	0	0	0	0	0	0	0	0	0	0	0	0	0	P-sat	0	0	0	0	0	0	0	0	0	0	0	0	0	0	0	0	0	0	0	0	0	0	P-sat
P-sen	42	#VALUE!	P-sen	0	0	0	0	0	0	0	0	0	0	0	0	0	0	0	0	0	0	0	0	0	0	P-sen	0	0	0	0	0	0	0	0	0	0	0	0	0	0	0	0	0	0	0	0	0	0	P-sen
MY-mot	63	#VALUE!	MY-mot	0	0	0	0	0	0	0	0	0	0	0	0	0	0	0	0	0	0	0	0	0	0	MY-mot	0	0	0	0	0	0	0	0	0	0	0	0	0	0	1	2	0	0	0	0	0	3	MY-mot
MY-sat	1	#VALUE!	MY-sat	0	0	0	0	0	0	0	0	0	0	0	0	0	0	0	0	0	0	0	0	0	0	MY-sat	0	0	0	0	0	0	0	0	0	0	0	0	0	0	0	0	0	0	0	0	0	0	MY-sat
MY-sen	7	#VALUE!	MY-sen	0	0	0	0	0	0	0	0	0	0	0	0	0	0	0	0	0	0	0	0	0	0	MY-sen	0	0	0	0	0	0	0	0	0	0	0	0	0	0	0	0	0	0	0	0	0	0	MY-sen
blue gray tracts	68	#VALUE!	blue gray tracts	0	0	0	0	0	0	0	0	0	0	0	0	0	0	0	0	0	0	0	0	0	0	blue gray tracts	0	0	0	0	0	0	1	0	0	0	0	0	0	0	0	0	1	0	0	0	0	2	blue gray tracts
light grey tracts	167	#VALUE!	light grey tracts	0	0	0	0	0	1	0	0	0	0	0	0	0	0	0	0	0	0	0	0	0	1	light grey tracts	0	0	0	0	0	0	0	1	0	0	0	2	0	0	0	0	1	0	0	0	0	4	light grey tracts
CBX-tracts	1	#VALUE!	CBX-tracts	0	0	0	0	0	0	0	0	0	0	0	0	0	0	0	0	0	0	0	0	0	0	CBX-tracts	0	0	0	0	0	0	0	0	0	0	0	0	0	0	0	0	0	0	0	0	0	0	CBX-tracts
CTX tracts	10	#VALUE!	CTX tracts	0	0	0	0	0	0	0	0	0	0	0	0	0	0	0	0	0	0	0	0	0	0	CTX tracts	0	0	0	0	0	0	0	0	0	0	0	0	0	0	0	0	0	0	0	0	0	0	CTX tracts
HY-tracts	23	#VALUE!	HY-tracts	0	0	0	0	0	0	0	0	0	0	0	0	0	1	0	0	0	0	0	0	0	1	HY-tracts	0	0	0	0	0	0	0	0	0	0	0	0	0	0	0	0	0	0	0	0	0	0	HY-tracts
MB-tracts	9	#VALUE!	MB-tracts	0	0	0	0	0	0	0	0	0	0	0	0	0	0	0	0	0	0	0	0	0	0	MB-tracts	0	0	0	0	0	0	0	0	0	0	0	0	0	0	0	0	0	0	0	0	0	0	MB-tracts
MY-tracts	4	#VALUE!	MY-tracts	0	0	0	0	0	0	0	0	0	0	0	0	0	0	0	0	0	0	0	0	0	0	MY-tracts	0	0	0	0	0	0	0	0	0	0	0	0	0	0	0	0	0	0	0	0	0	0	MY-tracts
P-tracts	4	#VALUE!	P-tracts	0	0	0	0	0	0	0	0	0	0	0	0	0	0	0	0	0	0	0	0	0	0	P-tracts	0	0	0	0	0	0	0	0	0	0	0	0	0	0	0	0	0	0	0	0	0	0	P-tracts
TH-tracts	11	#VALUE!	TH-tracts	0	0	0	0	0	0	0	0	0	0	0	0	0	1	0	0	0	0	0	0	0	1	TH-tracts	0	0	0	0	0	0	0	0	0	0	0	0	0	0	0	0	0	0	0	0	0	0	TH-tracts
ventricles	20	#VALUE!	ventricles	0	0	0	0	0	0	1	0	0	0	0	0	0	0	0	0	0	0	0	0	0	1	ventricles	0	0	0	0	0	0	0	0	0	0	0	0	0	0	0	0	0	0	0	0	0	0	ventricles
TOTAL	3244	#VALUE!	TOTAL	0	0	0	3	2	9	3	0	5	3	0	3	1	3	0	0	0	0	0	0	0	32	TOTAL	0	0	0	0	1	0	10	6	7	0	0	2	1	3	6	6	7	5	1	0	0	55	TOTAL
[truncated: 183 more columns]

## Sheet: CEP
Input#OfMice	TOTAL	Average per mouse	InputMouse#1791	_1	_2	_3	_4	_5	_6	_7	_8	_9	_10	_11	_12	_13	_14	_15	_16	_17	_18	_19	_20	_21	TOTAL	InputMouse#1796	_1	_2	_3	_4	_5	_6	_7	_8	_9	_10	_11	_12	_13	_14	_15	_16	_17	_18	_19	_20	_21	TOTAL	InputMouse#
ACA	121	#VALUE!	InputMouse#	0	0	0	0	0	0	0	0	0	0	0	0	0	0	0	0	13	0	0	0	0	13	ACA	0	0	0	0	0	0	0	0	0	0	0	0	0	0	0	0	14	40	54	0	0	108	ACA
AI	90	#VALUE!	InputMouse#	4	0	0	2	5	4	23	12	18	0	0	0	0	0	0	0	0	0	0	0	0	68	AI	1	2	2	0	0	0	4	10	3	0	0	0	0	0	0	0	0	0	0	0	0	22	AI
ECT	6	#VALUE!	InputMouse#	1	0	0	1	1	2	0	0	0	0	0	0	0	0	0	0	0	0	0	0	0	5	ECT	1	0	0	0	0	0	0	0	0	0	0	0	0	0	0	0	0	0	0	0	0	1	ECT
FRP	37	#VALUE!	InputMouse#	0	0	0	0	0	0	0	0	0	0	6	3	7	2	10	7	0	0	0	0	0	35	FRP	0	0	0	0	0	0	0	0	0	0	0	0	0	2	0	0	0	0	0	0	0	2	FRP
GU	14	#VALUE!	InputMouse#	1	0	3	1	0	0	0	0	0	0	0	0	0	0	0	0	0	0	0	0	0	5	GU	1	0	2	6	0	0	0	0	0	0	0	0	0	0	0	0	0	0	0	0	0	9	GU
ILA2/3	0	#VALUE!	InputMouse#	0	0	0	0	0	0	0	0	0	0	0	0	0	0	0	0	0	0	0	0	0	0	ILA2/3	0	0	0	0	0	0	0	0	0	0	0	0	0	0	0	0	0	0	0	0	0	0	ILA2/3
MO	1605	#VALUE!	InputMouse#	0	0	0	0	12	44	104	37	20	126	193	146	174	36	98	148	150	0	0	0	0	1288	MO	0	0	0	0	4	7	14	12	9	0	0	11	26	8	48	60	44	41	33	0	0	317	MO
ORB	460	#VALUE!	InputMouse#	0	0	0	0	0	0	0	4	48	119	68	53	35	0	21	20	70	0	0	0	0	438	ORB	0	0	0	0	0	0	0	1	0	0	0	3	6	0	7	0	2	3	0	0	0	22	ORB
PL	2	#VALUE!	InputMouse#	0	0	0	0	0	0	0	0	0	0	0	0	0	0	0	0	0	0	0	0	0	0	PL	0	0	0	0	0	0	0	0	0	0	0	0	0	0	0	0	0	2	0	0	0	2	PL
PTLp	137	#VALUE!	InputMouse#	0	0	0	0	0	13	6	3	1	0	13	9	21	1	8	0	0	0	0	0	0	75	PTLp	0	0	0	0	0	2	1	3	4	0	0	10	16	3	23	0	0	0	0	0	0	62	PTLp
RSP	467	#VALUE!	InputMouse#	0	0	0	0	0	0	0	10	1	1	0	0	8	0	3	79	75	0	0	0	0	177	RSP	0	0	0	0	0	0	1	0	0	0	0	6	0	0	5	119	42	60	57	0	0	290	RSP
SS	2083	#VALUE!	InputMouse#	245	182	88	80	90	157	173	115	168	138	50	79	78	14	42	0	0	0	0	0	0	1699	SS	30	25	45	31	9	28	6	20	36	0	0	55	63	15	21	0	0	0	0	0	0	384	SS
VIS	980	#VALUE!	InputMouse#	19	21	13	12	35	45	112	77	77	112	90	85	64	5	39	0	0	0	0	0	0	806	VIS	6	1	1	2	2	0	1	5	3	0	0	33	8	35	77	0	0	0	0	0	0	174	VIS
VISC	37	#VALUE!	InputMouse#	3	3	8	13	0	0	0	0	0	0	0	0	0	0	0	0	0	0	0	0	0	27	VISC	0	1	3	6	0	0	0	0	0	0	0	0	0	0	0	0	0	0	0	0	0	10	VISC
CP	894	#VALUE!	InputMouse#	0	25	25	67	19	49	139	127	127	40	12	80	63	22	4	1	0	0	0	0	0	800	CP	2	7	2	9	9	13	9	12	9	0	0	12	5	3	2	0	0	0	0	0	0	94	CP
LS	31	#VALUE!	InputMouse#	0	0	0	0	0	0	0	0	0	0	0	0	0	0	0	0	18	0	0	0	0	18	LS	0	0	0	0	0	0	0	0	0	0	0	0	0	0	0	0	8	5	0	0	0	13	LS
sAMY	15	#VALUE!	InputMouse#	0	0	0	0	0	1	2	5	0	0	0	0	0	0	0	0	0	0	0	0	0	8	sAMY	0	0	0	0	1	0	1	5	0	0	0	0	0	0	0	0	0	0	0	0	0	7	sAMY
STRv	129	#VALUE!	InputMouse#	0	0	0	1	0	0	0	7	11	4	3	8	4	2	3	5	13	0	0	0	0	61	STRv	0	3	0	0	0	0	0	0	0	1	1	2	4	21	18	7	7	3	1	0	0	68	STRv
GP	30	#VALUE!	InputMouse#	0	0	0	0	0	2	9	2	2	3	0	3	0	0	0	0	0	0	0	0	0	21	GP	0	0	0	0	0	0	0	0	9	0	0	0	0	0	0	0	0	0	0	0	0	9	GP
PALc	47	#VALUE!	InputMouse#	0	0	0	0	0	0	0	0	0	0	0	0	0	0	1	0	1	0	0	0	0	2	PALc	0	0	0	0	0	0	0	0	0	0	0	0	0	0	27	7	2	9	0	0	0	45	PALc
PALm	11	#VALUE!	InputMouse#	0	0	0	0	0	0	0	0	0	0	0	0	0	0	0	1	0	0	0	0	0	1	PALm	0	0	0	0	0	0	0	0	0	0	0	0	2	0	0	3	0	0	5	0	0	10	PALm
PALv	84	#VALUE!	InputMouse#	0	0	0	0	0	0	2	4	0	0	0	15	7	0	0	0	0	0	0	0	0	28	PALv	0	0	0	0	0	0	0	2	0	0	0	13	6	6	6	22	1	0	0	0	0	56	PALv
LZ/ME	88	#VALUE!	InputMouse#	0	0	0	0	0	0	0	0	2	0	0	8	11	2	7	3	2	0	0	0	0	35	LZ/ME	0	0	0	0	0	0	0	0	0	0	0	4	21	8	6	14	0	0	0	0	0	53	LZ/ME
MEZ	20	#VALUE!	InputMouse#	0	0	0	0	0	0	0	0	0	0	0	0	0	0	0	0	12	0	0	0	0	12	MEZ	0	0	0	0	0	0	0	0	0	0	0	0	0	0	0	0	1	5	2	0	0	8	MEZ
PVR	19	#VALUE!	InputMouse#	0	0	0	0	0	0	0	0	0	0	0	0	0	0	0	0	0	0	0	0	0	0	PVR	0	0	0	0	0	0	0	0	0	0	0	0	0	0	0	0	1	18	0	0	0	19	PVR
PVZ	2	#VALUE!	InputMouse#	0	0	0	0	0	0	0	0	0	0	0	0	0	0	0	0	0	0	0	0	0	0	PVZ	0	0	0	0	0	0	0	0	0	0	0	0	0	0	0	0	0	0	2	0	0	2	PVZ
AOB-dark/ Nlot	16	#VALUE!	InputMouse#	0	0	0	0	0	0	0	1	0	0	0	0	4	1	9	0	0	0	0	0	0	15	AOB-dark/ Nlot	0	0	0	0	0	0	0	1	0	0	0	0	0	0	0	0	0	0	0	0	0	1	AOB-dark/ Nlot
AOB-light	14	#VALUE!	InputMouse#	0	0	0	0	0	0	0	0	0	0	0	0	1	0	10	3	0	0	0	0	0	14	AOB-light	0	0	0	0	0	0	0	0	0	0	0	0	0	0	0	0	0	0	0	0	0	0	AOB-light
AON	103	#VALUE!	InputMouse#	0	0	0	0	0	0	0	0	0	0	8	25	11	0	14	5	30	0	0	0	0	93	AON	0	0	0	0	0	0	0	0	0	0	0	0	1	0	3	4	1	1	0	0	0	10	AON
COA	66	#VALUE!	InputMouse#	4	12	6	12	4	11	9	4	0	0	0	0	0	0	0	0	0	0	0	0	0	62	COA	3	0	1	0	0	0	0	0	0	0	0	0	0	0	0	0	0	0	0	0	0	4	COA
MOB-dark	160	#VALUE!	InputMouse#	0	0	0	0	0	0	0	0	0	12	25	17	22	1	36	19	25	0	0	0	0	157	MOB-dark	0	0	0	0	0	0	0	0	0	0	0	0	0	0	0	0	0	3	0	0	0	3	MOB-dark
MOB-light	106	#VALUE!	InputMouse#	0	1	7	0	1	0	1	0	0	0	26	8	13	1	15	10	19	0	0	0	0	102	MOB-light	0	0	0	0	0	0	0	0	0	0	0	0	2	0	0	1	1	0	0	0	0	4	MOB-light
PAA	18	#VALUE!	InputMouse#	0	0	0	15	0	0	0	0	0	0	0	0	0	0	0	0	0	0	0	0	0	15	PAA	2	1	0	0	0	0	0	0	0	0	0	0	0	0	0	0	0	0	0	0	0	3	PAA
PIR	123	#VALUE!	InputMouse#	3	9	0	4	5	18	18	7	17	9	10	7	5	0	0	0	0	0	0	0	0	112	PIR	2	0	1	0	0	0	6	1	0	0	0	0	1	0	0	0	0	0	0	0	0	11	PIR
TR	17	#VALUE!	InputMouse#	3	7	2	0	0	0	0	0	0	0	0	0	0	0	0	0	0	0	0	0	0	12	TR	0	5	0	0	0	0	0	0	0	0	0	0	0	0	0	0	0	0	0	0	0	5	TR
TT	15	#VALUE!	InputMouse#	0	0	0	0	0	0	0	0	0	0	0	0	0	0	0	0	9	0	0	0	0	9	TT	0	0	0	0	0	0	0	0	0	0	0	0	0	0	0	0	2	1	3	0	0	6	TT
BLA	12	#VALUE!	InputMouse#	3	6	1	1	0	0	0	0	0	0	0	0	0	0	0	0	0	0	0	0	0	11	BLA	0	1	0	0	0	0	0	0	0	0	0	0	0	0	0	0	0	0	0	0	0	1	BLA
BMA	1	#VALUE!	InputMouse#	0	0	0	0	0	0	0	0	0	0	0	0	0	0	0	0	0	0	0	0	0	0	BMA	0	0	0	0	0	0	0	1	0	0	0	0	0	0	0	0	0	0	0	0	0	1	BMA
CLA	71	#VALUE!	InputMouse#	29	3	0	2	0	1	3	3	14	2	0	4	3	1	2	0	0	0	0	0	0	67	CLA	1	0	0	0	0	0	1	0	1	0	0	1	0	0	0	0	0	0	0	0	0	4	CLA
EP	55	#VALUE!	InputMouse#	2	2	1	0	0	6	1	2	9	5	3	2	1	0	0	0	0	0	0	0	0	34	EP	4	8	5	0	0	0	1	0	0	0	0	0	0	0	3	0	0	0	0	0	0	21	EP
PA	1	#VALUE!	InputMouse#	0	0	1	0	0	0	0	0	0	0	0	0	0	0	0	0	0	0	0	0	0	1	PA	0	0	0	0	0	0	0	0	0	0	0	0	0	0	0	0	0	0	0	0	0	0	PA
DOR-pm	103	#VALUE!	InputMouse#	0	0	0	0	0	0	0	1	0	0	8	4	9	15	19	17	13	0	0	0	0	86	DOR-pm	0	0	0	0	0	0	1	3	1	0	0	0	0	0	0	3	4	5	0	0	0	17	DOR-pm
DOR-sm	48	#VALUE!	InputMouse#	0	0	0	0	0	0	0	0	6	19	5	1	2	0	4	1	1	0	0	0	0	39	DOR-sm	0	0	0	0	0	0	0	0	2	0	0	4	0	0	3	0	0	0	0	0	0	9	DOR-sm
LA	10	#VALUE!	InputMouse#	0	0	0	0	0	0	0	0	0	0	0	0	0	0	0	0	0	0	0	0	0	0	LA	0	10	0	0	0	0	0	0	0	0	0	0	0	0	0	0	0	0	0	0	0	10	LA
MB-mot	171	#VALUE!	InputMouse#	0	0	0	0	0	0	0	0	6	1	9	12	22	10	11	19	58	0	0	0	0	148	MB-mot	0	0	0	0	0	0	0	0	0	0	0	0	4	2	5	3	6	3	0	0	0	23	MB-mot
MB-sen	107	#VALUE!	InputMouse#	0	0	0	0	0	0	0	0	0	2	4	12	6	39	3	4	18	0	0	0	0	88	MB-sen	0	0	0	0	0	0	0	0	0	0	0	2	0	1	2	1	1	12	0	0	0	19	MB-sen
MB-sta	4	#VALUE!	InputMouse#	0	0	0	0	0	0	0	0	0	0	0	0	4	0	0	0	0	0	0	0	0	4	MB-sta	0	0	0	0	0	0	0	0	0	0	0	0	0	0	0	0	0	0	0	0	0	0	MB-sta
ENT	90	#VALUE!	InputMouse#	5	18	7	3	2	9	0	0	0	0	0	0	0	0	0	0	0	0	0	0	0	44	ENT	3	33	4	1	2	3	0	0	0	0	0	0	0	0	0	0	0	0	0	0	0	46	ENT
CA123_pyramidal/DG_granule	14	#VALUE!	InputMouse#	0	3	1	0	0	0	0	1	2	0	0	0	0	0	0	0	2	0	0	0	0	9	CA123_pyramidal/DG_granule	1	0	1	0	0	2	1	0	0	0	0	0	0	0	0	0	0	0	0	0	0	5	CA123_pyramidal/DG_granule
CA123 / DG	67	#VALUE!	InputMouse#	1	5	2	0	1	3	8	5	14	2	3	0	0	2	0	3	0	0	0	0	0	49	CA123 / DG	0	0	2	2	0	3	0	1	2	0	0	1	0	3	1	2	0	1	0	0	0	18	CA123 / DG
PAR	23	#VALUE!	InputMouse#	0	0	0	0	0	0	12	0	0	0	0	0	0	0	0	0	0	0	0	0	0	12	PAR	0	0	0	0	0	3	8	0	0	0	0	0	0	0	0	0	0	0	0	0	0	11	PAR
POST	19	#VALUE!	InputMouse#	0	0	0	0	0	0	3	0	1	4	8	0	0	0	0	0	0	0	0	0	0	16	POST	0	0	0	0	0	0	0	0	3	0	0	0	0	0	0	0	0	0	0	0	0	3	POST
PRE	17	#VALUE!	InputMouse#	0	0	0	0	0	0	1	10	0	0	0	0	0	0	0	0	0	0	0	0	0	11	PRE	0	0	0	0	3	0	0	1	2	0	0	0	0	0	0	0	0	0	0	0	0	6	PRE
SUB	48	#VALUE!	InputMouse#	0	2	1	10	0	0	0	1	7	0	0	0	0	0	0	0	0	0	0	0	0	21	SUB	1	2	8	1	4	8	1	0	1	0	0	0	0	0	0	0	1	0	0	0	0	27	SUB
CBX-granular	95	#VALUE!	InputMouse#	0	0	0	0	0	1	0	0	0	24	5	2	9	5	9	11	16	0	0	0	0	82	CBX-granular	0	0	0	0	0	0	0	0	4	0	0	1	2	0	2	0	0	0	4	0	0	13	CBX-granular
CBX-molecular	121	#VALUE!	InputMouse#	0	0	0	0	0	0	5	6	0	20	5	4	28	12	3	17	3	0	0	0	0	103	CBX-molecular	0	0	0	0	0	0	0	2	1	0	0	1	5	0	0	0	0	5	4	0	0	18	CBX-molecular
DN	30	#VALUE!	InputMouse#	0	0	0	0	0	0	0	0	0	0	0	0	16	0	0	14	0	0	0	0	0	30	DN	0	0	0	0	0	0	0	0	0	0	0	0	0	0	0	0	0	0	0	0	0	0	DN
P-mot	45	#VALUE!	InputMouse#	0	0	0	0	0	0	0	0	0	0	1	0	0	1	7	11	15	0	0	0	0	35	P-mot	0	0	0	0	0	0	0	0	0	0	0	0	1	0	4	0	0	4	1	0	0	10	P-mot
P-sat	43	#VALUE!	InputMouse#	0	0	0	0	0	0	0	0	0	0	3	1	0	2	2	0	33	0	0	0	0	41	P-sat	0	0	0	0	0	0	0	0	0	0	0	0	0	0	1	0	0	1	0	0	0	2	P-sat
P-sen	34	#VALUE!	InputMouse#	0	0	0	0	0	0	0	0	0	0	0	1	0	0	29	1	1	0	0	0	0	32	P-sen	0	0	0	0	0	0	0	0	0	0	0	0	2	0	0	0	0	0	0	0	0	2	P-sen
MY-mot	195	#VALUE!	InputMouse#	0	0	0	0	0	0	0	0	0	0	8	41	6	38	28	53	0	0	0	0	0	174	MY-mot	0	0	0	0	0	0	0	0	0	0	0	1	0	3	2	1	0	14	0	0	0	21	MY-mot
MY-sat	1	#VALUE!	InputMouse#	0	0	0	0	0	0	0	0	0	0	0	0	0	0	0	0	0	0	0	0	0	0	MY-sat	0	0	0	0	0	0	0	0	0	0	0	0	0	0	0	0	0	0	1	0	0	1	MY-sat
MY-sen	58	#VALUE!	InputMouse#	0	0	0	0	0	0	0	0	0	0	10	15	0	21	12	0	0	0	0	0	0	58	MY-sen	0	0	0	0	0	0	0	0	0	0	0	0	0	0	0	0	0	0	0	0	0	0	MY-sen
blue gray tracts	108	#VALUE!	InputMouse#	10	7	0	1	1	0	0	1	0	1	4	8	24	1	2	2	2	0	0	0	0	64	blue gray tracts	5	13	2	1	3	0	0	0	1	0	0	3	1	0	6	3	3	1	2	0	0	44	blue gray tracts
light grey tracts	440	#VALUE!	InputMouse#	0	0	0	0	0	16	49	36	65	22	25	34	0	9	33	20	71	0	0	0	0	380	light grey tracts	0	0	0	0	0	3	2	2	4	0	1	4	0	2	22	3	3	14	0	0	0	60	light grey tracts
CBX-tracts	7	#VALUE!	InputMouse#	0	0	0	0	0	0	0	0	0	0	0	0	6	0	0	0	0	0	0	0	0	6	CBX-tracts	0	0	0	0	0	0	0	0	0	0	0	0	1	0	0	0	0	0	0	0	0	1	CBX-tracts
CTX tracts	13	#VALUE!	InputMouse#	3	3	0	0	0	2	0	0	1	0	1	1	0	0	0	0	0	0	0	0	0	11	CTX tracts	0	2	0	0	0	0	0	0	0	0	0	0	0	0	0	0	0	0	0	0	0	2	CTX tracts
HY-tracts	4	#VALUE!	InputMouse#	0	0	0	0	0	0	0	0	0	0	0	0	0	0	0	1	1	0	0	0	0	2	HY-tracts	0	0	0	0	0	0	0	0	0	0	0	0	1	0	1	0	0	0	0	0	0	2	HY-tracts
MB-tracts	24	#VALUE!	InputMouse#	0	0	0	0	0	0	0	0	1	0	1	4	4	1	0	0	2	0	0	0	0	13	MB-tracts	0	0	0	0	0	0	0	0	0	0	0	1	4	0	0	1	1	0	4	0	0	11	MB-tracts
MY-tracts	20	#VALUE!	InputMouse#	0	0	0	0	0	0	0	0	0	0	1	6	1	3	0	4	0	0	0	0	0	15	MY-tracts	0	0	0	0	0	0	0	0	0	0	0	1	0	0	0	0	0	1	3	0	0	5	MY-tracts
P-tracts	5	#VALUE!	InputMouse#	0	0	0	0	0	0	0	0	0	0	0	0	0	1	1	0	2	0	0	0	0	4	P-tracts	0	0	0	0	0	0	0	0	0	0	0	0	0	1	0	0	0	0	0	0	0	1	P-tracts
TH-tracts	7	#VALUE!	InputMouse#	0	0	0	0	0	0	0	0	0	1	1	1	1	0	0	1	1	0	0	0	0	6	TH-tracts	0	0	0	0	0	0	0	0	0	0	0	0	0	0	0	0	0	0	1	0	0	1	TH-tracts
ventricles	28	#VALUE!	InputMouse#	0	0	0	0	0	0	0	1	0	0	2	5	10	2	2	1	0	0	0	0	0	23	ventricles	0	0	0	0	1	0	0	0	0	0	0	1	0	0	0	0	1	2	0	0	0	5	ventricles
TOTAL	10186	#VALUE!	TOTAL	336	309	166	225	176	384	680	482	618	667	611	704	680	250	487	481	676	0	0	0	0	7932	TOTAL	63	114	79	59	38	72	58	82	95	1	2	170	182	113	295	254	146	254	177	0	0	2254	TOTAL
[truncated: 183 more columns]

## Sheet: Saline
Input#OfMice	TOTAL	Average per mouse	InputMouse#1824	_1	_2	_3	_4	_5	_6	_7	_8	_9	_10	_11	_12	_13	_14	_15	_16	_17	_18	_19	_20	_21	TOTAL	InputMouse#1793	_1	_2	_3	_4	_5	_6	_7	_8	_9	_10	_11	_12	_13	_14	_15	_16	_17	_18	_19	_20	_21	TOTAL	InputMouse#
ACA	0	#VALUE!	ACA	0	0	0	0	0	0	0	0	0	0	0	0	0	0	0	0	0	0	0	0	0	0	ACA	0	0	0	0	0	0	0	0	0	0	0	0	0	0	0	0	0	0	0	0	0	0	ACA
AI	1	#VALUE!	AI	0	0	0	0	0	0	0	0	0	0	0	0	0	0	0	0	0	0	0	0	0	0	AI	0	0	1	0	0	0	0	0	0	0	0	0	0	0	0	0	0	0	0	0	0	1	AI
ECT	0	#VALUE!	ECT	0	0	0	0	0	0	0	0	0	0	0	0	0	0	0	0	0	0	0	0	0	0	ECT	0	0	0	0	0	0	0	0	0	0	0	0	0	0	0	0	0	0	0	0	0	0	ECT
FRP	0	#VALUE!	FRP	0	0	0	0	0	0	0	0	0	0	0	0	0	0	0	0	0	0	0	0	0	0	FRP	0	0	0	0	0	0	0	0	0	0	0	0	0	0	0	0	0	0	0	0	0	0	FRP
GU	0	#VALUE!	GU	0	0	0	0	0	0	0	0	0	0	0	0	0	0	0	0	0	0	0	0	0	0	GU	0	0	0	0	0	0	0	0	0	0	0	0	0	0	0	0	0	0	0	0	0	0	GU
ILA2/3	0	#VALUE!	ILA2/3	0	0	0	0	0	0	0	0	0	0	0	0	0	0	0	0	0	0	0	0	0	0	ILA2/3	0	0	0	0	0	0	0	0	0	0	0	0	0	0	0	0	0	0	0	0	0	0	ILA2/3
MO	0	#VALUE!	MO	0	0	0	0	0	0	0	0	0	0	0	0	0	0	0	0	0	0	0	0	0	0	MO	0	0	0	0	0	0	0	0	0	0	0	0	0	0	0	0	0	0	0	0	0	0	MO
ORB	2	#VALUE!	ORB	0	0	0	0	0	0	0	0	0	0	0	0	0	0	1	1	0	0	0	0	0	2	ORB	0	0	0	0	0	0	0	0	0	0	0	0	0	0	0	0	0	0	0	0	0	0	ORB
PL	0	#VALUE!	PL	0	0	0	0	0	0	0	0	0	0	0	0	0	0	0	0	0	0	0	0	0	0	PL	0	0	0	0	0	0	0	0	0	0	0	0	0	0	0	0	0	0	0	0	0	0	PL
PTLp	0	#VALUE!	PTLp	0	0	0	0	0	0	0	0	0	0	0	0	0	0	0	0	0	0	0	0	0	0	PTLp	0	0	0	0	0	0	0	0	0	0	0	0	0	0	0	0	0	0	0	0	0	0	PTLp
RSP	0	#VALUE!	RSP	0	0	0	0	0	0	0	0	0	0	0	0	0	0	0	0	0	0	0	0	0	0	RSP	0	0	0	0	0	0	0	0	0	0	0	0	0	0	0	0	0	0	0	0	0	0	RSP
SS	0	#VALUE!	SS	0	0	0	0	0	0	0	0	0	0	0	0	0	0	0	0	0	0	0	0	0	0	SS	0	0	0	0	0	0	0	0	0	0	0	0	0	0	0	0	0	0	0	0	0	0	SS
VIS	0	#VALUE!	VIS	0	0	0	0	0	0	0	0	0	0	0	0	0	0	0	0	0	0	0	0	0	0	VIS	0	0	0	0	0	0	0	0	0	0	0	0	0	0	0	0	0	0	0	0	0	0	VIS
VISC	0	#VALUE!	VISC	0	0	0	0	0	0	0	0	0	0	0	0	0	0	0	0	0	0	0	0	0	0	VISC	0	0	0	0	0	0	0	0	0	0	0	0	0	0	0	0	0	0	0	0	0	0	VISC
CP	0	#VALUE!	CP	0	0	0	0	0	0	0	0	0	0	0	0	0	0	0	0	0	0	0	0	0	0	CP	0	0	0	0	0	0	0	0	0	0	0	0	0	0	0	0	0	0	0	0	0	0	CP
LS	2	#VALUE!	LS	0	0	0	0	0	0	0	0	0	0	0	0	0	0	0	0	0	0	0	0	0	0	LS	0	0	0	0	0	0	0	0	0	0	0	0	0	0	0	0	2	0	0	0	0	2	LS
sAMY	2	#VALUE!	sAMY	0	0	0	0	0	0	0	0	0	0	0	0	0	0	0	0	0	0	0	0	0	0	sAMY	0	0	0	0	0	0	0	2	0	0	0	0	0	0	0	0	0	0	0	0	0	2	sAMY
STRv	0	#VALUE!	STRv	0	0	0	0	0	0	0	0	0	0	0	0	0	0	0	0	0	0	0	0	0	0	STRv	0	0	0	0	0	0	0	0	0	0	0	0	0	0	0	0	0	0	0	0	0	0	STRv
GP	0	#VALUE!	GP	0	0	0	0	0	0	0	0	0	0	0	0	0	0	0	0	0	0	0	0	0	0	GP	0	0	0	0	0	0	0	0	0	0	0	0	0	0	0	0	0	0	0	0	0	0	GP
PALc	0	#VALUE!	PALc	0	0	0	0	0	0	0	0	0	0	0	0	0	0	0	0	0	0	0	0	0	0	PALc	0	0	0	0	0	0	0	0	0	0	0	0	0	0	0	0	0	0	0	0	0	0	PALc
PALm	0	#VALUE!	PALm	0	0	0	0	0	0	0	0	0	0	0	0	0	0	0	0	0	0	0	0	0	0	PALm	0	0	0	0	0	0	0	0	0	0	0	0	0	0	0	0	0	0	0	0	0	0	PALm
PALv	3	#VALUE!	PALv	0	0	0	0	0	0	0	0	0	0	0	0	0	0	0	0	0	0	0	0	0	0	PALv	0	0	0	0	0	0	0	0	3	0	0	0	0	0	0	0	0	0	0	0	0	3	PALv
LZ/ME	0	#VALUE!	LZ/ME	0	0	0	0	0	0	0	0	0	0	0	0	0	0	0	0	0	0	0	0	0	0	LZ/ME	0	0	0	0	0	0	0	0	0	0	0	0	0	0	0	0	0	0	0	0	0	0	LZ/ME
MEZ	0	#VALUE!	MEZ	0	0	0	0	0	0	0	0	0	0	0	0	0	0	0	0	0	0	0	0	0	0	MEZ	0	0	0	0	0	0	0	0	0	0	0	0	0	0	0	0	0	0	0	0	0	0	MEZ
PVR	0	#VALUE!	PVR	0	0	0	0	0	0	0	0	0	0	0	0	0	0	0	0	0	0	0	0	0	0	PVR	0	0	0	0	0	0	0	0	0	0	0	0	0	0	0	0	0	0	0	0	0	0	PVR
PVZ	0	#VALUE!	PVZ	0	0	0	0	0	0	0	0	0	0	0	0	0	0	0	0	0	0	0	0	0	0	PVZ	0	0	0	0	0	0	0	0	0	0	0	0	0	0	0	0	0	0	0	0	0	0	PVZ
AOB-dark/ Nlot	0	#VALUE!	AOB-dark/ Nlot	0	0	0	0	0	0	0	0	0	0	0	0	0	0	0	0	0	0	0	0	0	0	AOB-dark/ Nlot	0	0	0	0	0	0	0	0	0	0	0	0	0	0	0	0	0	0	0	0	0	0	AOB-dark/ Nlot
AOB-light	0	#VALUE!	AOB-light	0	0	0	0	0	0	0	0	0	0	0	0	0	0	0	0	0	0	0	0	0	0	AOB-light	0	0	0	0	0	0	0	0	0	0	0	0	0	0	0	0	0	0	0	0	0	0	AOB-light
AON	0	#VALUE!	AON	0	0	0	0	0	0	0	0	0	0	0	0	0	0	0	0	0	0	0	0	0	0	AON	0	0	0	0	0	0	0	0	0	0	0	0	0	0	0	0	0	0	0	0	0	0	AON
COA	0	#VALUE!	COA	0	0	0	0	0	0	0	0	0	0	0	0	0	0	0	0	0	0	0	0	0	0	COA	0	0	0	0	0	0	0	0	0	0	0	0	0	0	0	0	0	0	0	0	0	0	COA
MOB-dark	0	#VALUE!	MOB-dark	0	0	0	0	0	0	0	0	0	0	0	0	0	0	0	0	0	0	0	0	0	0	MOB-dark	0	0	0	0	0	0	0	0	0	0	0	0	0	0	0	0	0	0	0	0	0	0	MOB-dark
MOB-light	0	#VALUE!	MOB-light	0	0	0	0	0	0	0	0	0	0	0	0	0	0	0	0	0	0	0	0	0	0	MOB-light	0	0	0	0	0	0	0	0	0	0	0	0	0	0	0	0	0	0	0	0	0	0	MOB-light
PAA	0	#VALUE!	PAA	0	0	0	0	0	0	0	0	0	0	0	0	0	0	0	0	0	0	0	0	0	0	PAA	0	0	0	0	0	0	0	0	0	0	0	0	0	0	0	0	0	0	0	0	0	0	PAA
PIR	1	#VALUE!	PIR	0	0	0	0	0	0	0	0	0	0	0	0	0	0	0	0	0	0	0	0	0	0	PIR	0	0	0	0	1	0	0	0	0	0	0	0	0	0	0	0	0	0	0	0	0	1	PIR
TR	0	#VALUE!	TR	0	0	0	0	0	0	0	0	0	0	0	0	0	0	0	0	0	0	0	0	0	0	TR	0	0	0	0	0	0	0	0	0	0	0	0	0	0	0	0	0	0	0	0	0	0	TR
TT	0	#VALUE!	TT	0	0	0	0	0	0	0	0	0	0	0	0	0	0	0	0	0	0	0	0	0	0	TT	0	0	0	0	0	0	0	0	0	0	0	0	0	0	0	0	0	0	0	0	0	0	TT
BLA	0	#VALUE!	BLA	0	0	0	0	0	0	0	0	0	0	0	0	0	0	0	0	0	0	0	0	0	0	BLA	0	0	0	0	0	0	0	0	0	0	0	0	0	0	0	0	0	0	0	0	0	0	BLA
BMA	0	#VALUE!	BMA	0	0	0	0	0	0	0	0	0	0	0	0	0	0	0	0	0	0	0	0	0	0	BMA	0	0	0	0	0	0	0	0	0	0	0	0	0	0	0	0	0	0	0	0	0	0	BMA
CLA	0	#VALUE!	CLA	0	0	0	0	0	0	0	0	0	0	0	0	0	0	0	0	0	0	0	0	0	0	CLA	0	0	0	0	0	0	0	0	0	0	0	0	0	0	0	0	0	0	0	0	0	0	CLA
EP	0	#VALUE!	EP	0	0	0	0	0	0	0	0	0	0	0	0	0	0	0	0	0	0	0	0	0	0	EP	0	0	0	0	0	0	0	0	0	0	0	0	0	0	0	0	0	0	0	0	0	0	EP
PA	1	#VALUE!	PA	0	0	0	0	0	0	0	0	0	0	0	0	0	0	0	0	0	0	0	0	0	0	PA	0	0	1	0	0	0	0	0	0	0	0	0	0	0	0	0	0	0	0	0	0	1	PA
DOR-pm	0	#VALUE!	DOR-pm	0	0	0	0	0	0	0	0	0	0	0	0	0	0	0	0	0	0	0	0	0	0	DOR-pm	0	0	0	0	0	0	0	0	0	0	0	0	0	0	0	0	0	0	0	0	0	0	DOR-pm
DOR-sm	0	#VALUE!	DOR-sm	0	0	0	0	0	0	0	0	0	0	0	0	0	0	0	0	0	0	0	0	0	0	DOR-sm	0	0	0	0	0	0	0	0	0	0	0	0	0	0	0	0	0	0	0	0	0	0	DOR-sm
LA	0	#VALUE!	LA	0	0	0	0	0	0	0	0	0	0	0	0	0	0	0	0	0	0	0	0	0	0	LA	0	0	0	0	0	0	0	0	0	0	0	0	0	0	0	0	0	0	0	0	0	0	LA
MB-mot	0	#VALUE!	MB-mot	0	0	0	0	0	0	0	0	0	0	0	0	0	0	0	0	0	0	0	0	0	0	MB-mot	0	0	0	0	0	0	0	0	0	0	0	0	0	0	0	0	0	0	0	0	0	0	MB-mot
MB-sen	2	#VALUE!	MB-sen	0	0	0	0	0	0	0	0	0	0	0	0	0	0	0	0	0	0	0	0	0	0	MB-sen	0	0	0	0	0	0	0	0	0	0	2	0	0	0	0	0	0	0	0	0	0	2	MB-sen
MB-sta	0	#VALUE!	MB-sta	0	0	0	0	0	0	0	0	0	0	0	0	0	0	0	0	0	0	0	0	0	0	MB-sta	0	0	0	0	0	0	0	0	0	0	0	0	0	0	0	0	0	0	0	0	0	0	MB-sta
ENT	1	#VALUE!	ENT	0	0	0	0	0	0	0	0	0	0	0	0	0	0	0	0	0	0	0	0	0	0	ENT	0	0	1	0	0	0	0	0	0	0	0	0	0	0	0	0	0	0	0	0	0	1	ENT
CA123_pyramidal/DG_granule	1	#VALUE!	CA123_pyramidal/DG_granule	0	0	0	0	0	0	0	0	0	0	0	0	0	0	0	0	0	0	0	0	0	0	CA123_pyramidal/DG_granule	0	0	0	0	0	0	0	0	1	0	0	0	0	0	0	0	0	0	0	0	0	1	CA123_pyramidal/DG_granule
CA123 / DG	14	#VALUE!	CA123 / DG	0	0	0	0	0	0	0	0	0	0	0	0	0	0	0	0	0	0	0	0	0	0	CA123 / DG	0	0	1	0	2	0	1	4	6	0	0	0	0	0	0	0	0	0	0	0	0	14	CA123 / DG
PAR	0	#VALUE!	PAR	0	0	0	0	0	0	0	0	0	0	0	0	0	0	0	0	0	0	0	0	0	0	PAR	0	0	0	0	0	0	0	0	0	0	0	0	0	0	0	0	0	0	0	0	0	0	PAR
POST	0	#VALUE!	POST	0	0	0	0	0	0	0	0	0	0	0	0	0	0	0	0	0	0	0	0	0	0	POST	0	0	0	0	0	0	0	0	0	0	0	0	0	0	0	0	0	0	0	0	0	0	POST
PRE	0	#VALUE!	PRE	0	0	0	0	0	0	0	0	0	0	0	0	0	0	0	0	0	0	0	0	0	0	PRE	0	0	0	0	0	0	0	0	0	0	0	0	0	0	0	0	0	0	0	0	0	0	PRE
SUB	0	#VALUE!	SUB	0	0	0	0	0	0	0	0	0	0	0	0	0	0	0	0	0	0	0	0	0	0	SUB	0	0	0	0	0	0	0	0	0	0	0	0	0	0	0	0	0	0	0	0	0	0	SUB
CBX-granular	5	#VALUE!	CBX-granular	0	0	0	0	0	0	0	0	0	0	0	0	0	0	0	0	0	0	0	0	0	0	CBX-granular	0	0	0	0	0	0	0	0	0	1	2	2	0	0	0	0	0	0	0	0	0	5	CBX-granular
CBX-molecular	3	#VALUE!	CBX-molecular	0	0	0	0	0	0	0	0	0	0	0	0	0	0	0	0	0	0	0	0	0	0	CBX-molecular	0	0	0	0	0	0	0	0	1	0	1	1	0	0	0	0	0	0	0	0	0	3	CBX-molecular
DN	0	#VALUE!	DN	0	0	0	0	0	0	0	0	0	0	0	0	0	0	0	0	0	0	0	0	0	0	DN	0	0	0	0	0	0	0	0	0	0	0	0	0	0	0	0	0	0	0	0	0	0	DN
P-mot	0	#VALUE!	P-mot	0	0	0	0	0	0	0	0	0	0	0	0	0	0	0	0	0	0	0	0	0	0	P-mot	0	0	0	0	0	0	0	0	0	0	0	0	0	0	0	0	0	0	0	0	0	0	P-mot
P-sat	0	#VALUE!	P-sat	0	0	0	0	0	0	0	0	0	0	0	0	0	0	0	0	0	0	0	0	0	0	P-sat	0	0	0	0	0	0	0	0	0	0	0	0	0	0	0	0	0	0	0	0	0	0	P-sat
P-sen	0	#VALUE!	P-sen	0	0	0	0	0	0	0	0	0	0	0	0	0	0	0	0	0	0	0	0	0	0	P-sen	0	0	0	0	0	0	0	0	0	0	0	0	0	0	0	0	0	0	0	0	0	0	P-sen
MY-mot	0	#VALUE!	MY-mot	0	0	0	0	0	0	0	0	0	0	0	0	0	0	0	0	0	0	0	0	0	0	MY-mot	0	0	0	0	0	0	0	0	0	0	0	0	0	0	0	0	0	0	0	0	0	0	MY-mot
MY-sat	0	#VALUE!	MY-sat	0	0	0	0	0	0	0	0	0	0	0	0	0	0	0	0	0	0	0	0	0	0	MY-sat	0	0	0	0	0	0	0	0	0	0	0	0	0	0	0	0	0	0	0	0	0	0	MY-sat
MY-sen	0	#VALUE!	MY-sen	0	0	0	0	0	0	0	0	0	0	0	0	0	0	0	0	0	0	0	0	0	0	MY-sen	0	0	0	0	0	0	0	0	0	0	0	0	0	0	0	0	0	0	0	0	0	0	MY-sen
blue gray tracts	0	#VALUE!	blue gray tracts	0	0	0	0	0	0	0	0	0	0	0	0	0	0	0	0	0	0	0	0	0	0	blue gray tracts	0	0	0	0	0	0	0	0	0	0	0	0	0	0	0	0	0	0	0	0	0	0	blue gray tracts
light grey tracts	0	#VALUE!	light grey tracts	0	0	0	0	0	0	0	0	0	0	0	0	0	0	0	0	0	0	0	0	0	0	light grey tracts	0	0	0	0	0	0	0	0	0	0	0	0	0	0	0	0	0	0	0	0	0	0	light grey tracts
CBX-tracts	2	#VALUE!	CBX-tracts	0	0	0	0	0	0	0	0	0	0	0	0	2	0	0	0	0	0	0	0	0	2	CBX-tracts	0	0	0	0	0	0	0	0	0	0	0	0	0	0	0	0	0	0	0	0	0	0	CBX-tracts
CTX tracts	0	#VALUE!	CTX tracts	0	0	0	0	0	0	0	0	0	0	0	0	0	0	0	0	0	0	0	0	0	0	CTX tracts	0	0	0	0	0	0	0	0	0	0	0	0	0	0	0	0	0	0	0	0	0	0	CTX tracts
HY-tracts	0	#VALUE!	HY-tracts	0	0	0	0	0	0	0	0	0	0	0	0	0	0	0	0	0	0	0	0	0	0	HY-tracts	0	0	0	0	0	0	0	0	0	0	0	0	0	0	0	0	0	0	0	0	0	0	HY-tracts
MB-tracts	0	#VALUE!	MB-tracts	0	0	0	0	0	0	0	0	0	0	0	0	0	0	0	0	0	0	0	0	0	0	MB-tracts	0	0	0	0	0	0	0	0	0	0	0	0	0	0	0	0	0	0	0	0	0	0	MB-tracts
MY-tracts	0	#VALUE!	MY-tracts	0	0	0	0	0	0	0	0	0	0	0	0	0	0	0	0	0	0	0	0	0	0	MY-tracts	0	0	0	0	0	0	0	0	0	0	0	0	0	0	0	0	0	0	0	0	0	0	MY-tracts
P-tracts	0	#VALUE!	P-tracts	0	0	0	0	0	0	0	0	0	0	0	0	0	0	0	0	0	0	0	0	0	0	P-tracts	0	0	0	0	0	0	0	0	0	0	0	0	0	0	0	0	0	0	0	0	0	0	P-tracts
TH-tracts	0	#VALUE!	TH-tracts	0	0	0	0	0	0	0	0	0	0	0	0	0	0	0	0	0	0	0	0	0	0	TH-tracts	0	0	0	0	0	0	0	0	0	0	0	0	0	0	0	0	0	0	0	0	0	0	TH-tracts
ventricles	0	#VALUE!	ventricles	0	0	0	0	0	0	0	0	0	0	0	0	0	0	0	0	0	0	0	0	0	0	ventricles	0	0	0	0	0	0	0	0	0	0	0	0	0	0	0	0	0	0	0	0	0	0	ventricles
TOTAL	40	#VALUE!	TOTAL	0	0	0	0	0	0	0	0	0	0	0	0	2	0	1	1	0	0	0	0	0	4	TOTAL	0	0	4	0	3	0	1	6	11	1	5	3	0	0	0	0	2	0	0	0	0	36	TOTAL
[truncated: 183 more columns]

## Sheet: PcA Totals
Region	InputMouse#1760	InputMouse#1761	InputMouse#1779	InputMouse#1780	InputMouse#1789	InputMouse#1790	InputMouse#1794	InputMouse#1816	InputMouse#1798	InputMouse#1799	TOTAL			Isocortex												NORMALIZE	Region	InputMouse#1760	InputMouse#1761	InputMouse#1779	InputMouse#1780	InputMouse#1789	InputMouse#1790	InputMouse#1794	InputMouse#1816	InputMouse#1798	InputMouse#1799	AVERAGE	SD
ACA	0	0	0	0	1	0	0	16	0	0	17				InputMouse#1760	InputMouse#1761	InputMouse#1779	InputMouse#1780	InputMouse#1789	InputMouse#1790	InputMouse#1794	InputMouse#1816	InputMouse#1798	InputMouse#1799	TOTAL		ACA	0	0	0	0	0.796626	0	0	1.16025	0	0	#VALUE!	0.421354
AI	0	0	1	11	0	0	3	7	2	1	25			ACA	0	0	0	0	1	0	0	16	0	0	17		AI	0	0	1.28679	3.60044	0	0	1.27018	0.60168	2.98301	0.741538	#VALUE!	1.29323
ECT	0	0	0	1	0	0	0	0	0	2	3			AI	0	0	1	11	0	0	3	7	2	1	25		ECT	0	0	0	2.46811	0	0	0	0	0	11.1832	#VALUE!	3.53584
FRP	0	0	0	1	0	0	4	13	0	0	18			ECT	0	0	0	1	0	0	0	0	0	2	3		FRP	0	0	0	2.26648	0	0	11.7272	7.73748	0	0	#VALUE!	4.15409
GU	0	0	0	1	1	0	1	1	0	0	4			FRP	0	0	0	1	0	0	4	13	0	0	18		GU	0	0	0	1.63812	4.72579	0	2.11899	0.43018	0	0	#VALUE!	1.55447
ILA2/3	0	0	0	0	0	0	0	2	0	0	2			GU	0	0	0	1	1	0	1	1	0	0	4		ILA2/3	0	0	0	0	0	0	0	0.963924	0	0	#VALUE!	0.30482
MO	2	2	6	10	18	6	40	119	7	12	222			ILA2/3	0	0	0	0	0	0	0	2	0	0	2		MO	1.04861	0.610103	0.986931	0.418399	2.17267	0.666668	2.16488	1.30751	1.3346	1.13748	#VALUE!	0.598143
ORB	0	3	0	11	2	2	15	19	2	12	66			MO	2	2	6	10	18	6	40	119	7	12	222		ORB	0	3.2425	0	1.63068	0.855335	0.787361	2.87641	0.739666	1.35104	4.03022	#VALUE!	1.38834
PL	0	0	0	0	0	0	0	4	0	0	4			ORB	0	3	0	11	2	2	15	19	2	12	66		PL	0	0	0	0	0	0	0	0.850036	0	0	#VALUE!	0.268805
PTLp	0	0	0	3	4	0	3	4	0	0	14			PL	0	0	0	0	0	0	0	4	0	0	4		PTLp	0	0	0	2.10995	8.11598	0	2.72933	0.738783	0	0	#VALUE!	2.57258
RSP	0	3	0	9	1	0	2	7	5	3	30			PTLp	0	0	0	3	4	0	3	4	0	0	14		RSP	0	2.79848	0	1.1515	0.369105	0	0.331004	0.235192	2.91509	0.869586	#VALUE!	1.11533
SS	8	0	30	31	33	0	31	64	11	5	213			RSP	0	3	0	9	1	0	2	7	5	3	30		SS	4.01756	0	4.72654	1.24234	3.81524	0	1.60702	0.67354	2.00878	0.453962	#VALUE!	1.74694
VIS	8	3	4	35	21	0	32	74	15	1	193			SS	8	0	30	31	33	0	31	64	11	5	213		VIS	7.71466	1.6832	1.21014	2.6934	4.6621	0	3.18541	1.49544	5.26	0.174343	#VALUE!	2.45047
VISC	0	0	0	2	0	0	1	0	0	1	4			VIS	8	3	4	35	21	0	32	74	15	1	193		VISC	0	0	0	1.89031	0	0	1.22261	0	0	2.14129	#VALUE!	0.875119
CP	3	7	7	70	3	55	80	180	3	10	418			VISC	0	0	0	2	0	0	1	0	0	1	4		CP	2.11106	2.86592	1.54535	3.93082	0.485999	8.20191	5.81109	2.65438	0.767658	1.2722	#VALUE!	2.4301
LS	0	0	0	17	0	0	0	15	0	0	32			TOTAL	18	11	41	115	81	8	132	330	42	37	815		LS	0	0	0	5.03398	0	0	0	1.16643	0	0	#VALUE!	1.59363
sAMY	0	1	2	5	7	0	0	6	2	0	23			NORMALIZE	2.17777	0.774319	1.55623	1.11031	2.25611	0.205118	1.64855	0.83669	1.84781	0.809316			sAMY	0	2.26139	2.43876	1.55083	6.26357	0	0	0.488709	2.82674	0	#VALUE!	1.99636
STRv	1	1	14	7	7	37	7	43	2	6	125			Striatum													STRv	1.37851	0.802043	6.05464	0.770041	2.22149	10.809	0.996086	1.2422	1.00255	1.49533	#VALUE!	3.26033
GP	0	8	0	1	0	0	0	13	1	13	36				InputMouse#1760	InputMouse#1761	InputMouse#1779	InputMouse#1780	InputMouse#1789	InputMouse#1790	InputMouse#1794	InputMouse#1816	InputMouse#1798	InputMouse#1799	TOTAL		GP	0	33.6942	0	0.577675	0	0	0	1.97212	2.63236	17.0137	#VALUE!	11.1731
PALc	0	0	0	3	0	1	0	14	0	1	19			CP	3	7	7	70	3	55	80	180	3	10	418		PALc	0	0	0	1.58691	0	1.40475	0	1.94475	0	1.1984	#VALUE!	0.812831
PALm	0	0	0	0	1	0	0	4	3	0	8			LS	0	0	0	17	0	0	0	15	0	0	32		PALm	0	0	0	0	1.29696	0	0	0.472241	6.14584	0	#VALUE!	1.92676
PALv	0	1	2	6	7	0	3	26	0	1	46			sAMY	0	1	2	5	7	0	0	6	2	0	23		PALv	0	2.90163	3.12921	2.38788	8.03689	0	1.54442	2.71731	0	0.901637	#VALUE!	2.41175
LZ/ME	1	0	1	5	1	0	2	194	1	5	210			STRv	1	1	14	7	7	37	7	43	2	6	125		LZ/ME	2.14786	0	0.67384	0.857003	0.494472	0	0.44343	8.73212	0.781041	1.94157	#VALUE!	2.60435
MEZ	0	0	0	5	0	0	0	12	0	0	17			TOTAL	4	9	23	99	17	92	87	244	7	16	598		MEZ	0	0	0	1.34831	0	0	0	0.849781	0	0	#VALUE!	0.478065
PVR	0	0	0	2	1	0	0	3	1	0	7			NORMALIZE	1.2829	1.67943	2.31425	2.5338	1.25521	6.25307	2.88031	1.63996	0.81639	0.927746			PVR	0	0	0	1.24202	1.79154	0	0	0.489243	2.82983	0	#VALUE!	0.997993
PVZ	0	2	0	0	0	0	0	0	0	0	2			Pallidum													PVZ	0	17.6514	0	0	0	0	0	0	0	0	#VALUE!	5.58188
BLA	0	0	1	6	1	0	1	0	0	0	9				InputMouse#1760	InputMouse#1761	InputMouse#1779	InputMouse#1780	InputMouse#1789	InputMouse#1790	InputMouse#1794	InputMouse#1816	InputMouse#1798	InputMouse#1799	TOTAL		AOB-dark/ Nlot	#REF!	#REF!	#REF!	#REF!	#REF!	#REF!	#REF!	#REF!	#REF!	#REF!	#REF!	#REF!
BMA	0	0	0	7	0	0	0	3	0	0	10			GP	0	8	0	1	0	0	0	13	1	13	36		AOB-light	#REF!	#REF!	#REF!	#REF!	#REF!	#REF!	#REF!	#REF!	#REF!	#REF!	#REF!	#REF!
CLA	0	0	0	3	2	2	9	5	2	1	24			PALc	0	0	0	3	0	1	0	14	0	1	19		AON	#REF!	#REF!	#REF!	#REF!	#REF!	#REF!	#REF!	#REF!	#REF!	#REF!	#REF!	#REF!
EP	0	0	0	5	0	1	9	12	3	0	30			PALm	0	0	0	0	1	0	0	4	3	0	8		COA	#REF!	#REF!	#REF!	#REF!	#REF!	#REF!	#REF!	#REF!	#REF!	#REF!	#REF!	#REF!
PA	0	0	0	1	0	0	0	0	0	0	1			PALv	0	1	2	6	7	0	3	26	0	1	46		MOB-dark	#REF!	#REF!	#REF!	#REF!	#REF!	#REF!	#REF!	#REF!	#REF!	#REF!	#REF!	#REF!
DOR-pm	0	1	0	33	1	0	1	99	4	15	154			TOTAL	0	9	2	10	8	1	3	57	4	15	109		MOB-light	#REF!	#REF!	#REF!	#REF!	#REF!	#REF!	#REF!	#REF!	#REF!	#REF!	#REF!	#REF!
DOR-sm	0	1	1	6	0	2	3	23	0	8	44			NORMALIZE	0	6.73083	0.806526	1.02576	2.36736	0.272403	0.39806	1.53541	1.86967	3.48583			PAA	#REF!	#REF!	#REF!	#REF!	#REF!	#REF!	#REF!	#REF!	#REF!	#REF!	#REF!	#REF!
LA	0	0	0	0	0	0	0	1	0	0	1			Hypothalamus													PIR	#REF!	#REF!	#REF!	#REF!	#REF!	#REF!	#REF!	#REF!	#REF!	#REF!	#REF!	#REF!
MB-mot	0	0	2	16	6	0	5	40	9	18	96				InputMouse#1760	InputMouse#1761	InputMouse#1779	InputMouse#1780	InputMouse#1789	InputMouse#1790	InputMouse#1794	InputMouse#1816	InputMouse#1798	InputMouse#1799	TOTAL		TR	#REF!	#REF!	#REF!	#REF!	#REF!	#REF!	#REF!	#REF!	#REF!	#REF!	#REF!	#REF!
MB-sen	0	1	0	9	0	0	5	11	0	0	26			LZ/ME	1	0	1	5	1	0	2	194	1	5	210		TT	#REF!	#REF!	#REF!	#REF!	#REF!	#REF!	#REF!	#REF!	#REF!	#REF!	#REF!	#REF!
MB-sta	0	0	0	2	1	0	0	9	0	0	12			MEZ	0	0	0	5	0	0	0	12	0	0	17		BLA	0	0	2.2252	3.39606	1.63288	0	0.732162	0	0	0	#VALUE!	1.21605
ENT	2	0	0	11	2	8	12	32	0	7	74			PVR	0	0	0	2	1	0	0	3	1	0	7		BMA	0	0	0	10.1128	0	0	0	1.13815	0	0	#VALUE!	3.17815
CA123_pyramidal/DG_granule	2	0	0	2	0	0	1	6	0	2	13			PVZ	0	2	0	0	0	0	0	0	0	0	2		CLA	0	0	0	2.20878	4.24807	3.91047	8.57151	0.966735	6.71002	1.66803	#VALUE!	2.98947
CA123 / DG	1	4	4	4	2	2	2	22	0	1	42			TOTAL	1	2	1	12	2	0	2	209	2	5	236		EP	0	0	0	1.6854	0	0.895158	3.92426	1.06223	4.60803	0	#VALUE!	1.71855
PAR	0	0	0	0	0	0	0	3	0	0	3			NORMALIZE	0.896913	1.04368	0.281385	0.858889	0.412967	0	0.185169	3.92833	0.652301	0.810769			PA	0	0	0	1.37227	0	0	0	0	0	0	#VALUE!	0.433949
POST	0	2	0	0	0	0	1	11	0	0	14			Olfactory Areas													DOR-pm	0	0.624688	0	2.82745	0.247179	0	0.110832	2.22752	1.56172	2.91168	#VALUE!	1.21512
PRE	0	0	0	2	0	0	0	4	0	0	6				InputMouse#1760	InputMouse#1761	InputMouse#1779	InputMouse#1780	InputMouse#1789	InputMouse#1790	InputMouse#1794	InputMouse#1816	InputMouse#1798	InputMouse#1799	TOTAL		DOR-sm	0	1.26365	0.681381	1.03991	0	0.920542	0.672589	1.04684	0	3.14128	#VALUE!	0.926235
SUB	0	0	0	2	1	1	8	18	5	10	45			AOB-dark/ Nlot	#REF!	#REF!	#REF!	#REF!	#REF!	#REF!	#REF!	#REF!	#REF!	#REF!	#REF!		LA	0	0	0	0	0	0	0	0.698838	0	0	#VALUE!	0.220992
CBX-granular	0	1	2	7	5	2	0	41	1	3	62			AOB-light	#REF!	#REF!	#REF!	#REF!	#REF!	#REF!	#REF!	#REF!	#REF!	#REF!	#REF!		MB-mot	0	0	0.380095	0.77346	0.836756	0	0.312659	0.507789	1.98254	1.97134	#VALUE!	0.748264
CBX-molecular	0	3	9	8	1	3	1	40	1	4	70			AON	#REF!	#REF!	#REF!	#REF!	#REF!	#REF!	#REF!	#REF!	#REF!	#REF!	#REF!		MB-sen	0	0.952788	0	1.17613	0	0	0.845215	0.377496	0	0	#VALUE!	0.4743
DN	0	0	0	1	0	0	0	1	0	0	2			COA	#REF!	#REF!	#REF!	#REF!	#REF!	#REF!	#REF!	#REF!	#REF!	#REF!	#REF!		MB-sta	0	0	0	0.94974	1.36995	0	0	1.12234	0	0	#VALUE!	0.563092
P-mot	0	2	1	1	2	4	0	17	0	1	28			MOB-dark	#REF!	#REF!	#REF!	#REF!	#REF!	#REF!	#REF!	#REF!	#REF!	#REF!	#REF!		ENT	5.74406	0	0	2.52108	1.32237	4.86913	3.55761	1.92597	0	3.63466	#VALUE!	2.07649
P-sat	0	0	0	3	0	2	1	15	0	7	28			MOB-light	#REF!	#REF!	#REF!	#REF!	#REF!	#REF!	#REF!	#REF!	#REF!	#REF!	#REF!		CA123_pyramidal/DG_granule	7.31025	0	0	0.583361	0	0	0.377303	0.459583	0	1.32163	#VALUE!	2.25526
P-sen	0	0	0	1	0	0	1	40	0	0	42			PAA	#REF!	#REF!	#REF!	#REF!	#REF!	#REF!	#REF!	#REF!	#REF!	#REF!	#REF!		CA123 / DG	0.941991	2.19227	1.18211	0.300685	0.433722	0.399254	0.194476	0.434291	0	0.170303	#VALUE!	0.656507
MY-mot	0	3	0	1	0	9	5	41	1	3	63			PIR	#REF!	#REF!	#REF!	#REF!	#REF!	#REF!	#REF!	#REF!	#REF!	#REF!	#REF!		PAR	0	0	0	0	0	0	0	1.37138	0	0	#VALUE!	0.433669
MY-sat	0	0	0	0	0	0	0	1	0	0	1			TR	#REF!	#REF!	#REF!	#REF!	#REF!	#REF!	#REF!	#REF!	#REF!	#REF!	#REF!		POST	0	19.305	0	0	0	0	1.71254	3.82434	0	0	#VALUE!	6.04181
MY-sen	0	0	0	0	0	0	0	6	0	1	7			TT	#REF!	#REF!	#REF!	#REF!	#REF!	#REF!	#REF!	#REF!	#REF!	#REF!	#REF!		PRE	0	0	0	2.45693	0	0	0	1.29041	0	0	#VALUE!	0.836488
blue gray tracts	0	2	5	6	0	4	10	33	2	6	68			TOTAL	#REF!	#REF!	#REF!	#REF!	#REF!	#REF!	#REF!	#REF!	#REF!	#REF!	#REF!		SUB	0	0	0	0.4889	0.705212	0.649169	2.52966	1.1555	5.56957	5.53811	#VALUE!	2.18344
light grey tracts	1	4	8	12	5	7	9	105	2	14	167			NORMALIZE	#REF!	#REF!	#REF!	#REF!	#REF!	#REF!	#REF!	#REF!	#REF!	#REF!			CBX-granular	0	0.369439	0.398415	0.354698	0.730904	0.269128	0	0.54557	0.230899	0.344392	#VALUE!	0.222425
CBX-tracts	0	0	0	0	1	0	0	0	0	0	1			Cortical Subplate													CBX-molecular	0	0.94516	1.52893	0.345694	0.124661	0.344264	0.0558965	0.453908	0.196908	0.391592	#VALUE!	0.466811
CTX tracts	0	0	0	6	0	0	0	4	0	0	10				InputMouse#1760	InputMouse#1761	InputMouse#1779	InputMouse#1780	InputMouse#1789	InputMouse#1790	InputMouse#1794	InputMouse#1816	InputMouse#1798	InputMouse#1799	TOTAL		DN	0	0	0	0.640438	0	0	0	0.168183	0	0	#VALUE!	0.203595
HY-tracts	1	0	0	4	1	0	0	16	1	0	23			BLA	0	0	1	6	1	0	1	0	0	0	9		P-mot	0	2.28893	0.617113	0.156971	0.905691	1.66743	0	0.700769	0	0.355625	#VALUE!	0.773435
MB-tracts	0	0	0	2	0	0	1	5	1	0	9			BMA	0	0	0	7	0	0	0	3	0	0	10		P-sat	0	0	0	0.74147	0	1.31271	0.319709	0.973573	0	3.9196	#VALUE!	1.22044
MY-tracts	0	0	0	0	0	0	0	4	0	0	4			CLA	0	0	0	3	2	2	9	5	2	1	24		P-sen	0	0	0	0.320636	0	0	0.414758	3.36804	0	0	#VALUE!	1.05065
P-tracts	0	0	0	0	0	0	0	4	0	0	4			EP	0	0	0	5	0	1	9	12	3	0	30		MY-mot	0	1.30697	0	0.0597533	0	1.42814	0.386469	0.643356	0.272285	0.40612	#VALUE!	0.529768
TH-tracts	1	0	1	1	0	1	0	4	0	3	11			PA	0	0	0	1	0	0	0	0	0	0	1		MY-sat	0	0	0	0	0	0	0	0.367955	0	0	#VALUE!	0.116358
ventricles	1	0	1	3	0	2	1	11	1	0	20			TOTAL	0	0	1	22	3	3	19	20	5	1	74		MY-sen	0	0	0	0	0	0	0	0.249971	0	0.359421	#VALUE!	0.131036
TOTAL	32	55	102	401	139	151	310	1527	88	177	2982			NORMALIZE	0	0	0.448677	2.5108	0.987736	0.90924	2.80496	0.599412	2.60029	0.25856			blue gray tracts	0	1.58334	2.1344	0.651497	0	1.15342	1.40457	0.94098	0.989584	1.47599	#VALUE!	0.679446
														Thalamus													light grey tracts	0.426879	0.993464	1.07138	0.408782	0.491372	0.633251	0.396584	0.939302	0.310458	1.08046	#VALUE!	0.311109
															InputMouse#1760	InputMouse#1761	InputMouse#1779	InputMouse#1780	InputMouse#1789	InputMouse#1790	InputMouse#1794	InputMouse#1816	InputMouse#1798	InputMouse#1799	TOTAL		CBX-tracts	0	0	0	0	2.19883	0	0	0	0	0	#VALUE!	0.695332
														DOR-pm	0	1	0	33	1	0	1	99	4	15	154		CTX tracts	0	0	0	5.12293	0	0	0	0.896877	0	0	#VALUE!	1.61331
										Updated percentages				DOR-sm	0	1	1	6	0	2	3	23	0	8	44		HY-tracts	5.61899	0	0	1.79359	1.29358	0	0	1.88404	2.04327	0	#VALUE!	1.77098
										Isocortex	0.258291			TOTAL	0	2	1	39	1	2	4	122	4	23	198		MB-tracts	0	0	0	0.565867	0	0	0.365988	0.3715	1.28928	0	#VALUE!	0.419288
										Striatum	0.0974356			NORMALIZE	0	0.716832	0.193263	1.91721	0.141819	0.261098	0.25436	1.57496	0.89604	2.56156			MY-tracts	0	0	0	0	0	0	0	0.283746	0	0	#VALUE!	0.0897284
										Pallidum	0.0243115			Midbrain													P-tracts	0	0	0	0	0	0	0	0.667799	0	0	#VALUE!	0.211177
										Hypothalamus	0.0348417				InputMouse#1760	InputMouse#1761	InputMouse#1779	InputMouse#1780	InputMouse#1789	InputMouse#1790	InputMouse#1794	InputMouse#1816	InputMouse#1798	InputMouse#1799	TOTAL		TH-tracts	7.49676	0	2.35192	0.598245	0	1.58872	0	0.628412	0	4.06604	#VALUE!	2.43933
										Cortical Subplate	0.0218507			LA	0	0	0	0	0	0	0	1	0	0	1		ventricles	#VALUE!	#VALUE!	#VALUE!	#VALUE!	#VALUE!	#VALUE!	#VALUE!	#VALUE!	#VALUE!	#VALUE!	#VALUE!	#VALUE!
										Thalamus	0.0507283			MB-mot	0	0	2	16	6	0	5	40	9	18	96
										Midbrain	0.0896422			MB-sen	0	1	0	9	0	0	5	11	0	0	26
										Hippocampal Formation	0.0794888			MB-sta	0	0	0	2	1	0	0	9	0	0	12
										Cerebellum	0.078593			TOTAL	0	1	2	27	7	0	10	61	9	18	135		Region	ACA	AI	ECT	FRP	GU	ILA2/3	MO	ORB	PL	PTLp	RSP	SS	VIS	VISC	CP	LS	sAMY	STRv	GP	PALc	PALm	PALv
										Pons	0.0393686			NORMALIZE	0	0.202827	0.218735	0.751116	0.561786	0	0.359854	0.445634	1.1409	1.13445			InputMouse#1760	0	0	0	0	0	0	1.04861	0	0	0	0	4.01756	7.71466	0	2.11106	0	0	1.37851	0	0	0	0
										Medulla	0.0690856			Hippocampal Formation													InputMouse#1761	0	0	0	0	0	0	0.610103	3.2425	0	0	2.79848	0	1.6832	0	2.86592	0	2.26139	0.802043	33.6942	0	0	2.90163
										Tracts	0.156363				InputMouse#1760	InputMouse#1761	InputMouse#1779	InputMouse#1780	InputMouse#1789	InputMouse#1790	InputMouse#1794	InputMouse#1816	InputMouse#1798	InputMouse#1799	TOTAL		InputMouse#1779	0	1.28679	0	0	0	0	0.986931	0	0	0	0	4.72654	1.21014	0	1.54535	0	2.43876	6.05464	0	0	0	3.12921
														ENT	2	0	0	11	2	8	12	32	0	7	74		InputMouse#1780	0	3.60044	2.46811	2.26648	1.63812	0	0.418399	1.63068	0	2.10995	1.1515	1.24234	2.6934	1.89031	3.93082	5.03398	1.55083	0.770041	0.577675	1.58691	0	2.38788
														CA123_pyramidal/DG_granule	2	0	0	2	0	0	1	6	0	2	13		InputMouse#1789	0.796626	0	0	0	4.72579	0	2.17267	0.855335	0	8.11598	0.369105	3.81524	4.6621	0	0.485999	0	6.26357	2.22149	0	0	1.29696	8.03689
														CA123 / DG	1	4	4	4	2	2	2	22	0	1	42		InputMouse#1790	0	0	0	0	0	0	0.666668	0.787361	0	0	0	0	0	0	8.20191	0	0	10.809	0	1.40475	0	0
														PAR	0	0	0	0	0	0	0	3	0	0	3		InputMouse#1794	0	1.27018	0	11.7272	2.11899	0	2.16488	2.87641	0	2.72933	0.331004	1.60702	3.18541	1.22261	5.81109	0	0	0.996086	0	0	0	1.54442
														POST	0	2	0	0	0	0	1	11	0	0	14		InputMouse#1816	1.16025	0.60168	0	7.73748	0.43018	0.963924	1.30751	0.739666	0.850036	0.738783	0.235192	0.67354	1.49544	0	2.65438	1.16643	0.488709	1.2422	1.97212	1.94475	0.472241	2.71731
														PRE	0	0	0	2	0	0	0	4	0	0	6		InputMouse#1798	0	2.98301	0	0	0	0	1.3346	1.35104	0	0	2.91509	2.00878	5.26	0	0.767658	0	2.82674	1.00255	2.63236	0	6.14584	0
														SUB	0	0	0	2	1	1	8	18	5	10	45		InputMouse#1799	0	0.741538	11.1832	0	0	0	1.13748	4.03022	0	0	0.869586	0.453962	0.174343	2.14129	1.2722	0	0	1.49533	17.0137	1.1984	0	0.901637
														TOTAL	5	6	4	21	5	11	24	96	5	20	197
														NORMALIZE	1.96569	1.37241	0.493349	0.658824	0.452532	0.916453	0.973966	0.790909	0.714795	1.42151
														Cerebellum
															InputMouse#1760	InputMouse#1761	InputMouse#1779	InputMouse#1780	InputMouse#1789	InputMouse#1790	InputMouse#1794	InputMouse#1816	InputMouse#1798	InputMouse#1799	TOTAL
														CBX-granular	0	1	2	7	5	2	0	41	1	3	62
														CBX-molecular	0	3	9	8	1	3	1	40	1	4	70
														DN	0	0	0	1	0	0	0	1	0	0	2
														TOTAL	0	4	11	16	6	5	1	82	2	7	134
														NORMALIZE	0	0.925366	1.37217	0.507682	0.549228	0.421317	0.0410445	0.683268	0.289177	0.503201
														Pons
															InputMouse#1760	InputMouse#1761	InputMouse#1779	InputMouse#1780	InputMouse#1789	InputMouse#1790	InputMouse#1794	InputMouse#1816	InputMouse#1798	InputMouse#1799	TOTAL
														P-mot	0	2	1	1	2	4	0	17	0	1	28
														P-sat	0	0	0	3	0	2	1	15	0	7	28
														P-sen	0	0	0	1	0	0	1	40	0	0	42
														TOTAL	0	2	1	5	2	6	2	72	0	8	98
														NORMALIZE	0	0.923671	0.249029	0.31672	0.365481	1.00931	0.163877	1.19769	0	1.14807
														Medulla
															InputMouse#1760	InputMouse#1761	InputMouse#1779	InputMouse#1780	InputMouse#1789	InputMouse#1790	InputMouse#1794	InputMouse#1816	InputMouse#1798	InputMouse#1799	TOTAL
														MY-mot	0	3	0	1	0	9	5	41	1	3	63
														MY-sat	0	0	0	0	0	0	0	1	0	0	1
														MY-sen	0	0	0	0	0	0	0	6	0	1	7
														TOTAL	0	3	0	1	0	9	5	48	1	4	71
														NORMALIZE	0	0.789535	0	0.0360968	0	0.862737	0.233465	0.455004	0.164486	0.327114
														Tracts
															InputMouse#1760	InputMouse#1761	InputMouse#1779	InputMouse#1780	InputMouse#1789	InputMouse#1790	InputMouse#1794	InputMouse#1816	InputMouse#1798	InputMouse#1799	TOTAL
														blue gray tracts	0	2	5	6	0	4	10	33	2	6	68
														light grey tracts	1	4	8	12	5	7	9	105	2	14	167
														CBX-tracts	0	0	0	0	1	0	0	0	0	0	1
														CTX tracts	0	0	0	6	0	0	0	4	0	0	10
														HY-tracts	1	0	0	4	1	0	0	16	1	0	23
														MB-tracts	0	0	0	2	0	0	1	5	1	0	9
														MY-tracts	0	0	0	0	0	0	0	4	0	0	4
														P-tracts	0	0	0	0	0	0	0	4	0	0	4
														TH-tracts	1	0	1	1	0	1	0	4	0	3	11
														ventricles	1	0	1	3	0	2	1	11	1	0	20
														TOTAL	4	6	15	34	7	14	21	186	7	23	317
														NORMALIZE	0.799424	0.697679	0.940499	0.542253	0.32207	0.59295	0.433236	0.779006	0.508724	0.831039
[truncated: 51 more columns]

## Sheet: CEP Totals
Region	InputMouse#1791	InputMouse#1796	InputMouse#	InputMouse#	InputMouse#	InputMouse#	InputMouse#	InputMouse#	InputMouse#	InputMouse#	TOTAL			Isocortex												NORMALIZE	Region	InputMouse#1791	InputMouse#1796	InputMouse#	InputMouse#	InputMouse#	InputMouse#	InputMouse#	InputMouse#	InputMouse#	InputMouse#	AVERAGE	SD
ACA	13	108	0	0	0	0	0	0	0	0	121				InputMouse#1791	InputMouse#1796	InputMouse#	InputMouse#	InputMouse#	InputMouse#	InputMouse#	InputMouse#	InputMouse#	InputMouse#	TOTAL		ACA		5.41865	#DIV/0!	#DIV/0!	#DIV/0!	#DIV/0!	#DIV/0!	#DIV/0!	#DIV/0!	#DIV/0!	#DIV/0!	#DIV/0!
AI	68	22	0	0	0	0	0	0	0	0	90			ACA	13	108	0	0	0	0	0	0	0	0	121		AI	1.2158	1.30836	#DIV/0!	#DIV/0!	#DIV/0!	#DIV/0!	#DIV/0!	#DIV/0!	#DIV/0!	#DIV/0!	#DIV/0!	#DIV/0!
ECT	5	1	0	0	0	0	0	0	0	0	6			AI	68	22	0	0	0	0	0	0	0	0	90		ECT	0.674099	0.448442	#DIV/0!	#DIV/0!	#DIV/0!	#DIV/0!	#DIV/0!	#DIV/0!	#DIV/0!	#DIV/0!	#DIV/0!	#DIV/0!
FRP	35	2	0	0	0	0	0	0	0	0	37			ECT	5	1	0	0	0	0	0	0	0	0	6		FRP	4.33319	0.823613	#DIV/0!	#DIV/0!	#DIV/0!	#DIV/0!	#DIV/0!	#DIV/0!	#DIV/0!	#DIV/0!	#DIV/0!	#DIV/0!
GU	5	9	0	0	0	0	0	0	0	0	14			FRP	35	2	0	0	0	0	0	0	0	0	37		GU	0.447409	2.67874	#DIV/0!	#DIV/0!	#DIV/0!	#DIV/0!	#DIV/0!	#DIV/0!	#DIV/0!	#DIV/0!	#DIV/0!	#DIV/0!
ILA2/3	0	0	0	0	0	0	0	0	0	0	0			GU	5	9	0	0	0	0	0	0	0	0	14		ILA2/3	0	0	#DIV/0!	#DIV/0!	#DIV/0!	#DIV/0!	#DIV/0!	#DIV/0!	#DIV/0!	#DIV/0!	#DIV/0!	#DIV/0!
MO	1288	317	0	0	0	0	0	0	0	0	1605			ILA2/3	0	0	0	0	0	0	0	0	0	0	0		MO	2.94372	2.40986	#DIV/0!	#DIV/0!	#DIV/0!	#DIV/0!	#DIV/0!	#DIV/0!	#DIV/0!	#DIV/0!	#DIV/0!	#DIV/0!
ORB	438	22	0	0	0	0	0	0	0	0	460			MO	1288	317	0	0	0	0	0	0	0	0	1605		ORB	3.54683	0.592572	#DIV/0!	#DIV/0!	#DIV/0!	#DIV/0!	#DIV/0!	#DIV/0!	#DIV/0!	#DIV/0!	#DIV/0!	#DIV/0!
PL	0	2	0	0	0	0	0	0	0	0	2			ORB	438	22	0	0	0	0	0	0	0	0	460		PL	0	0.294065	#DIV/0!	#DIV/0!	#DIV/0!	#DIV/0!	#DIV/0!	#DIV/0!	#DIV/0!	#DIV/0!	#DIV/0!	#DIV/0!
PTLp	75	62	0	0	0	0	0	0	0	0	137			PL	0	2	0	0	0	0	0	0	0	0	2		PTLp	2.88139	7.92292	#DIV/0!	#DIV/0!	#DIV/0!	#DIV/0!	#DIV/0!	#DIV/0!	#DIV/0!	#DIV/0!	#DIV/0!	#DIV/0!
RSP	177	290	0	0	0	0	0	0	0	0	467			PTLp	75	62	0	0	0	0	0	0	0	0	137		RSP	1.23704	6.74155	#DIV/0!	#DIV/0!	#DIV/0!	#DIV/0!	#DIV/0!	#DIV/0!	#DIV/0!	#DIV/0!	#DIV/0!	#DIV/0!
SS	1699	384	0	0	0	0	0	0	0	0	2083			RSP	177	290	0	0	0	0	0	0	0	0	467		SS	3.71929	2.79609	#DIV/0!	#DIV/0!	#DIV/0!	#DIV/0!	#DIV/0!	#DIV/0!	#DIV/0!	#DIV/0!	#DIV/0!	#DIV/0!
VIS	806	174	0	0	0	0	0	0	0	0	980			SS	1699	384	0	0	0	0	0	0	0	0	2083		VIS	3.3881	2.4329	#DIV/0!	#DIV/0!	#DIV/0!	#DIV/0!	#DIV/0!	#DIV/0!	#DIV/0!	#DIV/0!	#DIV/0!	#DIV/0!
VISC	27	10	0	0	0	0	0	0	0	0	37			VIS	806	174	0	0	0	0	0	0	0	0	980		VISC	1.39398	1.7173	#DIV/0!	#DIV/0!	#DIV/0!	#DIV/0!	#DIV/0!	#DIV/0!	#DIV/0!	#DIV/0!	#DIV/0!	#DIV/0!
CP	800	94	0	0	0	0	0	0	0	0	894			VISC	27	10	0	0	0	0	0	0	0	0	37		CP	2.45394	0.95908	#DIV/0!	#DIV/0!	#DIV/0!	#DIV/0!	#DIV/0!	#DIV/0!	#DIV/0!	#DIV/0!	#DIV/0!	#DIV/0!
LS	18	13	0	0	0	0	0	0	0	0	31			TOTAL	4636	1403	0	0	0	0	0	0	0	0	6039		LS	0.291155	0.699436	#DIV/0!	#DIV/0!	#DIV/0!	#DIV/0!	#DIV/0!	#DIV/0!	#DIV/0!	#DIV/0!	#DIV/0!	#DIV/0!
sAMY	8	7	0	0	0	0	0	0	0	0	15			NORMALIZE	2.445	2.46119	#DIV/0!	#DIV/0!	#DIV/0!	#DIV/0!	#DIV/0!	#DIV/0!	#DIV/0!	#DIV/0!			sAMY	0.135542	0.394488	#DIV/0!	#DIV/0!	#DIV/0!	#DIV/0!	#DIV/0!	#DIV/0!	#DIV/0!	#DIV/0!	#DIV/0!	#DIV/0!
STRv	61	68	0	0	0	0	0	0	0	0	129			Striatum													STRv	0.366551	1.35915	#DIV/0!	#DIV/0!	#DIV/0!	#DIV/0!	#DIV/0!	#DIV/0!	#DIV/0!	#DIV/0!	#DIV/0!	#DIV/0!
GP	21	9	0	0	0	0	0	0	0	0	30				InputMouse#1791	InputMouse#1796	InputMouse#	InputMouse#	InputMouse#	InputMouse#	InputMouse#	InputMouse#	InputMouse#	InputMouse#	TOTAL		GP	0.662662	0.944644	#DIV/0!	#DIV/0!	#DIV/0!	#DIV/0!	#DIV/0!	#DIV/0!	#DIV/0!	#DIV/0!	#DIV/0!	#DIV/0!
PALc	2	45	0	0	0	0	0	0	0	0	47			CP	800	94	0	0	0	0	0	0	0	0	894		PALc	0.0577897	4.325	#DIV/0!	#DIV/0!	#DIV/0!	#DIV/0!	#DIV/0!	#DIV/0!	#DIV/0!	#DIV/0!	#DIV/0!	#DIV/0!
PALm	1	10	0	0	0	0	0	0	0	0	11			LS	18	13	0	0	0	0	0	0	0	0	31		PALm	0.0245577	0.816847	#DIV/0!	#DIV/0!	#DIV/0!	#DIV/0!	#DIV/0!	#DIV/0!	#DIV/0!	#DIV/0!	#DIV/0!	#DIV/0!
PALv	28	56	0	0	0	0	0	0	0	0	84			sAMY	8	7	0	0	0	0	0	0	0	0	15		PALv	0.608706	4.0494	#DIV/0!	#DIV/0!	#DIV/0!	#DIV/0!	#DIV/0!	#DIV/0!	#DIV/0!	#DIV/0!	#DIV/0!	#DIV/0!
LZ/ME	35	53	0	0	0	0	0	0	0	0	88			STRv	61	68	0	0	0	0	0	0	0	0	129		LZ/ME	0.327695	1.65056	#DIV/0!	#DIV/0!	#DIV/0!	#DIV/0!	#DIV/0!	#DIV/0!	#DIV/0!	#DIV/0!	#DIV/0!	#DIV/0!
MEZ	12	8	0	0	0	0	0	0	0	0	20			TOTAL	887	182	0	0	0	0	0	0	0	0	1069		MEZ	0.176763	0.39197	#DIV/0!	#DIV/0!	#DIV/0!	#DIV/0!	#DIV/0!	#DIV/0!	#DIV/0!	#DIV/0!	#DIV/0!	#DIV/0!
PVR	0	19	0	0	0	0	0	0	0	0	19			NORMALIZE	1.24008	0.846352	#DIV/0!	#DIV/0!	#DIV/0!	#DIV/0!	#DIV/0!	#DIV/0!	#DIV/0!	#DIV/0!			PVR	0	2.14385	#DIV/0!	#DIV/0!	#DIV/0!	#DIV/0!	#DIV/0!	#DIV/0!	#DIV/0!	#DIV/0!	#DIV/0!	#DIV/0!
PVZ	0	2	0	0	0	0	0	0	0	0	2			Pallidum													PVZ	0	0.439886	#DIV/0!	#DIV/0!	#DIV/0!	#DIV/0!	#DIV/0!	#DIV/0!	#DIV/0!	#DIV/0!	#DIV/0!	#DIV/0!
BLA	11	1	0	0	0	0	0	0	0	0	12				InputMouse#1791	InputMouse#1796	InputMouse#	InputMouse#	InputMouse#	InputMouse#	InputMouse#	InputMouse#	InputMouse#	InputMouse#	TOTAL		AOB-dark/ Nlot	#REF!	#REF!	#REF!	#REF!	#REF!	#REF!	#REF!	#REF!	#REF!	#REF!	#REF!	#REF!
BMA	0	1	0	0	0	0	0	0	0	0	1			GP	21	9	0	0	0	0	0	0	0	0	30		AOB-light	#REF!	#REF!	#REF!	#REF!	#REF!	#REF!	#REF!	#REF!	#REF!	#REF!	#REF!	#REF!
CLA	67	4	0	0	0	0	0	0	0	0	71			PALc	2	45	0	0	0	0	0	0	0	0	47		AON	#REF!	#REF!	#REF!	#REF!	#REF!	#REF!	#REF!	#REF!	#REF!	#REF!	#REF!	#REF!
EP	34	21	0	0	0	0	0	0	0	0	55			PALm	1	10	0	0	0	0	0	0	0	0	11		COA	#REF!	#REF!	#REF!	#REF!	#REF!	#REF!	#REF!	#REF!	#REF!	#REF!	#REF!	#REF!
PA	1	0	0	0	0	0	0	0	0	0	1			PALv	28	56	0	0	0	0	0	0	0	0	84		MOB-dark	#REF!	#REF!	#REF!	#REF!	#REF!	#REF!	#REF!	#REF!	#REF!	#REF!	#REF!	#REF!
DOR-pm	86	17	0	0	0	0	0	0	0	0	103			TOTAL	52	120	0	0	0	0	0	0	0	0	172		MOB-light	#REF!	#REF!	#REF!	#REF!	#REF!	#REF!	#REF!	#REF!	#REF!	#REF!	#REF!	#REF!
DOR-sm	39	9	0	0	0	0	0	0	0	0	48			NORMALIZE	0.291365	2.23649	#DIV/0!	#DIV/0!	#DIV/0!	#DIV/0!	#DIV/0!	#DIV/0!	#DIV/0!	#DIV/0!			PAA	#REF!	#REF!	#REF!	#REF!	#REF!	#REF!	#REF!	#REF!	#REF!	#REF!	#REF!	#REF!
LA	0	10	0	0	0	0	0	0	0	0	10			Hypothalamus													PIR	#REF!	#REF!	#REF!	#REF!	#REF!	#REF!	#REF!	#REF!	#REF!	#REF!	#REF!	#REF!
MB-mot	148	23	0	0	0	0	0	0	0	0	171				InputMouse#1791	InputMouse#1796	InputMouse#	InputMouse#	InputMouse#	InputMouse#	InputMouse#	InputMouse#	InputMouse#	InputMouse#	TOTAL		TR	#REF!	#REF!	#REF!	#REF!	#REF!	#REF!	#REF!	#REF!	#REF!	#REF!	#REF!	#REF!
MB-sen	88	19	0	0	0	0	0	0	0	0	107			LZ/ME	35	53	0	0	0	0	0	0	0	0	88		TT	#REF!	#REF!	#REF!	#REF!	#REF!	#REF!	#REF!	#REF!	#REF!	#REF!	#REF!	#REF!
MB-sta	4	0	0	0	0	0	0	0	0	0	4			MEZ	12	8	0	0	0	0	0	0	0	0	20		BLA	0.3401	0.102841	#DIV/0!	#DIV/0!	#DIV/0!	#DIV/0!	#DIV/0!	#DIV/0!	#DIV/0!	#DIV/0!	#DIV/0!	#DIV/0!
ENT	44	46	0	0	0	0	0	0	0	0	90			PVR	0	19	0	0	0	0	0	0	0	0	19		BMA	0	0.262492	#DIV/0!	#DIV/0!	#DIV/0!	#DIV/0!	#DIV/0!	#DIV/0!	#DIV/0!	#DIV/0!	#DIV/0!	#DIV/0!
CA123_pyramidal/DG_granule	9	5	0	0	0	0	0	0	0	0	14			PVZ	0	2	0	0	0	0	0	0	0	0	2		CLA	2.69461	0.535099	#DIV/0!	#DIV/0!	#DIV/0!	#DIV/0!	#DIV/0!	#DIV/0!	#DIV/0!	#DIV/0!	#DIV/0!	#DIV/0!
CA123 / DG	49	18	0	0	0	0	0	0	0	0	67			TOTAL	47	82	0	0	0	0	0	0	0	0	129		EP	0.626037	1.28616	#DIV/0!	#DIV/0!	#DIV/0!	#DIV/0!	#DIV/0!	#DIV/0!	#DIV/0!	#DIV/0!	#DIV/0!	#DIV/0!
PAR	12	11	0	0	0	0	0	0	0	0	23			NORMALIZE	0.183757	1.06638	#DIV/0!	#DIV/0!	#DIV/0!	#DIV/0!	#DIV/0!	#DIV/0!	#DIV/0!	#DIV/0!			PA	0.0749596	0	#DIV/0!	#DIV/0!	#DIV/0!	#DIV/0!	#DIV/0!	#DIV/0!	#DIV/0!	#DIV/0!	#DIV/0!	#DIV/0!
POST	16	3	0	0	0	0	0	0	0	0	19			Olfactory Areas													DOR-pm	0.402503	0.26465	#DIV/0!	#DIV/0!	#DIV/0!	#DIV/0!	#DIV/0!	#DIV/0!	#DIV/0!	#DIV/0!	#DIV/0!	#DIV/0!
PRE	11	6	0	0	0	0	0	0	0	0	17				InputMouse#1791	InputMouse#1796	InputMouse#	InputMouse#	InputMouse#	InputMouse#	InputMouse#	InputMouse#	InputMouse#	InputMouse#	TOTAL		DOR-sm	0.369232	0.28342	#DIV/0!	#DIV/0!	#DIV/0!	#DIV/0!	#DIV/0!	#DIV/0!	#DIV/0!	#DIV/0!	#DIV/0!	#DIV/0!
SUB	21	27	0	0	0	0	0	0	0	0	48			AOB-dark/ Nlot	#REF!	#REF!	#REF!	#REF!	#REF!	#REF!	#REF!	#REF!	#REF!	#REF!	#REF!		LA	0	4.83519	#DIV/0!	#DIV/0!	#DIV/0!	#DIV/0!	#DIV/0!	#DIV/0!	#DIV/0!	#DIV/0!	#DIV/0!	#DIV/0!
CBX-granular	82	13	0	0	0	0	0	0	0	0	95			AOB-light	#REF!	#REF!	#REF!	#REF!	#REF!	#REF!	#REF!	#REF!	#REF!	#REF!	#REF!		MB-mot	0.390813	0.202017	#DIV/0!	#DIV/0!	#DIV/0!	#DIV/0!	#DIV/0!	#DIV/0!	#DIV/0!	#DIV/0!	#DIV/0!	#DIV/0!
CBX-molecular	103	18	0	0	0	0	0	0	0	0	121			AON	#REF!	#REF!	#REF!	#REF!	#REF!	#REF!	#REF!	#REF!	#REF!	#REF!	#REF!		MB-sen	0.628183	0.451139	#DIV/0!	#DIV/0!	#DIV/0!	#DIV/0!	#DIV/0!	#DIV/0!	#DIV/0!	#DIV/0!	#DIV/0!	#DIV/0!
DN	30	0	0	0	0	0	0	0	0	0	30			COA	#REF!	#REF!	#REF!	#REF!	#REF!	#REF!	#REF!	#REF!	#REF!	#REF!	#REF!		MB-sta	0.103759	0	#DIV/0!	#DIV/0!	#DIV/0!	#DIV/0!	#DIV/0!	#DIV/0!	#DIV/0!	#DIV/0!	#DIV/0!	#DIV/0!
P-mot	35	10	0	0	0	0	0	0	0	0	45			MOB-dark	#REF!	#REF!	#REF!	#REF!	#REF!	#REF!	#REF!	#REF!	#REF!	#REF!	#REF!		ENT	0.550854	1.91555	#DIV/0!	#DIV/0!	#DIV/0!	#DIV/0!	#DIV/0!	#DIV/0!	#DIV/0!	#DIV/0!	#DIV/0!	#DIV/0!
P-sat	41	2	0	0	0	0	0	0	0	0	43			MOB-light	#REF!	#REF!	#REF!	#REF!	#REF!	#REF!	#REF!	#REF!	#REF!	#REF!	#REF!		CA123_pyramidal/DG_granule	0.143397	0.264984	#DIV/0!	#DIV/0!	#DIV/0!	#DIV/0!	#DIV/0!	#DIV/0!	#DIV/0!	#DIV/0!	#DIV/0!	#DIV/0!
P-sen	32	2	0	0	0	0	0	0	0	0	34			PAA	#REF!	#REF!	#REF!	#REF!	#REF!	#REF!	#REF!	#REF!	#REF!	#REF!	#REF!		CA123 / DG	0.201204	0.245848	#DIV/0!	#DIV/0!	#DIV/0!	#DIV/0!	#DIV/0!	#DIV/0!	#DIV/0!	#DIV/0!	#DIV/0!	#DIV/0!
MY-mot	174	21	0	0	0	0	0	0	0	0	195			PIR	#REF!	#REF!	#REF!	#REF!	#REF!	#REF!	#REF!	#REF!	#REF!	#REF!	#REF!		PAR	1.14104	3.4791	#DIV/0!	#DIV/0!	#DIV/0!	#DIV/0!	#DIV/0!	#DIV/0!	#DIV/0!	#DIV/0!	#DIV/0!	#DIV/0!
MY-sat	0	1	0	0	0	0	0	0	0	0	1			TR	#REF!	#REF!	#REF!	#REF!	#REF!	#REF!	#REF!	#REF!	#REF!	#REF!	#REF!		POST	1.15709	0.721643	#DIV/0!	#DIV/0!	#DIV/0!	#DIV/0!	#DIV/0!	#DIV/0!	#DIV/0!	#DIV/0!	#DIV/0!	#DIV/0!
MY-sen	58	0	0	0	0	0	0	0	0	0	58			TT	#REF!	#REF!	#REF!	#REF!	#REF!	#REF!	#REF!	#REF!	#REF!	#REF!	#REF!		PRE	0.73815	1.33923	#DIV/0!	#DIV/0!	#DIV/0!	#DIV/0!	#DIV/0!	#DIV/0!	#DIV/0!	#DIV/0!	#DIV/0!	#DIV/0!
blue gray tracts	64	44	0	0	0	0	0	0	0	0	108			TOTAL	#REF!	#REF!	#REF!	#REF!	#REF!	#REF!	#REF!	#REF!	#REF!	#REF!	#REF!		SUB	0.280413	1.19921	#DIV/0!	#DIV/0!	#DIV/0!	#DIV/0!	#DIV/0!	#DIV/0!	#DIV/0!	#DIV/0!	#DIV/0!	#DIV/0!
light grey tracts	380	60	0	0	0	0	0	0	0	0	440			NORMALIZE	#REF!	#REF!	#REF!	#REF!	#REF!	#REF!	#REF!	#REF!	#REF!	#REF!			CBX-granular	0.226968	0.119687	#DIV/0!	#DIV/0!	#DIV/0!	#DIV/0!	#DIV/0!	#DIV/0!	#DIV/0!	#DIV/0!	#DIV/0!	#DIV/0!
CBX-tracts	6	1	0	0	0	0	0	0	0	0	7			Cortical Subplate													CBX-molecular	0.243124	0.141324	#DIV/0!	#DIV/0!	#DIV/0!	#DIV/0!	#DIV/0!	#DIV/0!	#DIV/0!	#DIV/0!	#DIV/0!	#DIV/0!
CTX tracts	11	2	0	0	0	0	0	0	0	0	13				InputMouse#1791	InputMouse#1796	InputMouse#	InputMouse#	InputMouse#	InputMouse#	InputMouse#	InputMouse#	InputMouse#	InputMouse#	TOTAL		DN	1.04951	0	#DIV/0!	#DIV/0!	#DIV/0!	#DIV/0!	#DIV/0!	#DIV/0!	#DIV/0!	#DIV/0!	#DIV/0!	#DIV/0!
HY-tracts	2	2	0	0	0	0	0	0	0	0	4			BLA	11	1	0	0	0	0	0	0	0	0	12		P-mot	0.300108	0.285209	#DIV/0!	#DIV/0!	#DIV/0!	#DIV/0!	#DIV/0!	#DIV/0!	#DIV/0!	#DIV/0!	#DIV/0!	#DIV/0!
MB-tracts	13	11	0	0	0	0	0	0	0	0	24			BMA	0	1	0	0	0	0	0	0	0	0	1		P-sat	0.553535	0.089814	#DIV/0!	#DIV/0!	#DIV/0!	#DIV/0!	#DIV/0!	#DIV/0!	#DIV/0!	#DIV/0!	#DIV/0!	#DIV/0!
MY-tracts	15	5	0	0	0	0	0	0	0	0	20			CLA	67	4	0	0	0	0	0	0	0	0	71		P-sen	0.560468	0.116516	#DIV/0!	#DIV/0!	#DIV/0!	#DIV/0!	#DIV/0!	#DIV/0!	#DIV/0!	#DIV/0!	#DIV/0!	#DIV/0!
P-tracts	4	1	0	0	0	0	0	0	0	0	5			EP	34	21	0	0	0	0	0	0	0	0	55		MY-mot	0.567937	0.227994	#DIV/0!	#DIV/0!	#DIV/0!	#DIV/0!	#DIV/0!	#DIV/0!	#DIV/0!	#DIV/0!	#DIV/0!	#DIV/0!
TH-tracts	6	1	0	0	0	0	0	0	0	0	7			PA	1	0	0	0	0	0	0	0	0	0	1		MY-sat	0	0.254584	#DIV/0!	#DIV/0!	#DIV/0!	#DIV/0!	#DIV/0!	#DIV/0!	#DIV/0!	#DIV/0!	#DIV/0!	#DIV/0!
ventricles	23	5	0	0	0	0	0	0	0	0	28			TOTAL	113	27	0	0	0	0	0	0	0	0	140		MY-sen	0.502632	0	#DIV/0!	#DIV/0!	#DIV/0!	#DIV/0!	#DIV/0!	#DIV/0!	#DIV/0!	#DIV/0!	#DIV/0!	#DIV/0!
TOTAL	7341	2207	0	0	0	0	0	0	0	0	9548			NORMALIZE	0.704462	0.559881	#DIV/0!	#DIV/0!	#DIV/0!	#DIV/0!	#DIV/0!	#DIV/0!	#DIV/0!	#DIV/0!			blue gray tracts	0.379604	0.868072	#DIV/0!	#DIV/0!	#DIV/0!	#DIV/0!	#DIV/0!	#DIV/0!	#DIV/0!	#DIV/0!	#DIV/0!	#DIV/0!
														Thalamus													light grey tracts	0.707104	0.371367	#DIV/0!	#DIV/0!	#DIV/0!	#DIV/0!	#DIV/0!	#DIV/0!	#DIV/0!	#DIV/0!	#DIV/0!	#DIV/0!
															InputMouse#1791	InputMouse#1796	InputMouse#	InputMouse#	InputMouse#	InputMouse#	InputMouse#	InputMouse#	InputMouse#	InputMouse#	TOTAL		CBX-tracts	0.249806	0.138486	#DIV/0!	#DIV/0!	#DIV/0!	#DIV/0!	#DIV/0!	#DIV/0!	#DIV/0!	#DIV/0!	#DIV/0!	#DIV/0!
										Updated percentages				DOR-pm	86	17	0	0	0	0	0	0	0	0	103		CTX tracts	0.513038	0.31027	#DIV/0!	#DIV/0!	#DIV/0!	#DIV/0!	#DIV/0!	#DIV/0!	#DIV/0!	#DIV/0!	#DIV/0!	#DIV/0!
										Isocortex	0.258291			DOR-sm	39	9	0	0	0	0	0	0	0	0	48		HY-tracts	0.0489873	0.162943	#DIV/0!	#DIV/0!	#DIV/0!	#DIV/0!	#DIV/0!	#DIV/0!	#DIV/0!	#DIV/0!	#DIV/0!	#DIV/0!
										Striatum	0.0974356			TOTAL	125	26	0	0	0	0	0	0	0	0	151		MB-tracts	0.200917	0.565482	#DIV/0!	#DIV/0!	#DIV/0!	#DIV/0!	#DIV/0!	#DIV/0!	#DIV/0!	#DIV/0!	#DIV/0!	#DIV/0!
										Pallidum	0.0243115			NORMALIZE	0.335664	0.232231	#DIV/0!	#DIV/0!	#DIV/0!	#DIV/0!	#DIV/0!	#DIV/0!	#DIV/0!	#DIV/0!			MY-tracts	0.221332	0.245401	#DIV/0!	#DIV/0!	#DIV/0!	#DIV/0!	#DIV/0!	#DIV/0!	#DIV/0!	#DIV/0!	#DIV/0!	#DIV/0!
										Hypothalamus	0.0348417			Midbrain													P-tracts	0.138909	0.115511	#DIV/0!	#DIV/0!	#DIV/0!	#DIV/0!	#DIV/0!	#DIV/0!	#DIV/0!	#DIV/0!	#DIV/0!	#DIV/0!
										Cortical Subplate	0.0218507				InputMouse#1791	InputMouse#1796	InputMouse#	InputMouse#	InputMouse#	InputMouse#	InputMouse#	InputMouse#	InputMouse#	InputMouse#	TOTAL		TH-tracts	0.196074	0.108698	#DIV/0!	#DIV/0!	#DIV/0!	#DIV/0!	#DIV/0!	#DIV/0!	#DIV/0!	#DIV/0!	#DIV/0!	#DIV/0!
										Thalamus	0.0507283			LA	0	10	0	0	0	0	0	0	0	0	10		ventricles	#VALUE!	#VALUE!	#DIV/0!	#DIV/0!	#DIV/0!	#DIV/0!	#DIV/0!	#DIV/0!	#DIV/0!	#DIV/0!	#VALUE!	#VALUE!
										Midbrain	0.0896422			MB-mot	148	23	0	0	0	0	0	0	0	0	171
										Hippocampal Formation	0.0794888			MB-sen	88	19	0	0	0	0	0	0	0	0	107
										Cerebellum	0.078593			MB-sta	4	0	0	0	0	0	0	0	0	0	4
										Pons	0.0393686			TOTAL	240	52	0	0	0	0	0	0	0	0	292		Region	ACA	AI	ECT	FRP	GU	ILA2/3	MO	ORB	PL	PTLp	RSP	SS	VIS	VISC	CP	LS	sAMY	STRv	GP	PALc	PALm	PALv
										Medulla	0.0690856			NORMALIZE	0.364707	0.262838	#DIV/0!	#DIV/0!	#DIV/0!	#DIV/0!	#DIV/0!	#DIV/0!	#DIV/0!	#DIV/0!			InputMouse#1791	0.196091	1.2158	0.674099	4.33319	0.447409	0	2.94372	3.54683	0	2.88139	1.23704	3.71929	3.3881	1.39398	2.45394	0.291155	0.135542	0.366551	0.662662	0.0577897	0.0245577	0.608706
										Tracts	0.156363			Hippocampal Formation													InputMouse#1796	5.41865	1.30836	0.448442	0.823613	2.67874	0	2.40986	0.592572	0.294065	7.92292	6.74155	2.79609	2.4329	1.7173	0.95908	0.699436	0.394488	1.35915	0.944644	4.325	0.816847	4.0494
															InputMouse#1791	InputMouse#1796	InputMouse#	InputMouse#	InputMouse#	InputMouse#	InputMouse#	InputMouse#	InputMouse#	InputMouse#	TOTAL		InputMouse#	#DIV/0!	#DIV/0!	#DIV/0!	#DIV/0!	#DIV/0!	#DIV/0!	#DIV/0!	#DIV/0!	#DIV/0!	#DIV/0!	#DIV/0!	#DIV/0!	#DIV/0!	#DIV/0!	#DIV/0!	#DIV/0!	#DIV/0!	#DIV/0!	#DIV/0!	#DIV/0!	#DIV/0!	#DIV/0!
														ENT	44	46	0	0	0	0	0	0	0	0	90		InputMouse#	#DIV/0!	#DIV/0!	#DIV/0!	#DIV/0!	#DIV/0!	#DIV/0!	#DIV/0!	#DIV/0!	#DIV/0!	#DIV/0!	#DIV/0!	#DIV/0!	#DIV/0!	#DIV/0!	#DIV/0!	#DIV/0!	#DIV/0!	#DIV/0!	#DIV/0!	#DIV/0!	#DIV/0!	#DIV/0!
														CA123_pyramidal/DG_granule	9	5	0	0	0	0	0	0	0	0	14		InputMouse#	#DIV/0!	#DIV/0!	#DIV/0!	#DIV/0!	#DIV/0!	#DIV/0!	#DIV/0!	#DIV/0!	#DIV/0!	#DIV/0!	#DIV/0!	#DIV/0!	#DIV/0!	#DIV/0!	#DIV/0!	#DIV/0!	#DIV/0!	#DIV/0!	#DIV/0!	#DIV/0!	#DIV/0!	#DIV/0!
														CA123 / DG	49	18	0	0	0	0	0	0	0	0	67		InputMouse#	#DIV/0!	#DIV/0!	#DIV/0!	#DIV/0!	#DIV/0!	#DIV/0!	#DIV/0!	#DIV/0!	#DIV/0!	#DIV/0!	#DIV/0!	#DIV/0!	#DIV/0!	#DIV/0!	#DIV/0!	#DIV/0!	#DIV/0!	#DIV/0!	#DIV/0!	#DIV/0!	#DIV/0!	#DIV/0!
														PAR	12	11	0	0	0	0	0	0	0	0	23		InputMouse#	#DIV/0!	#DIV/0!	#DIV/0!	#DIV/0!	#DIV/0!	#DIV/0!	#DIV/0!	#DIV/0!	#DIV/0!	#DIV/0!	#DIV/0!	#DIV/0!	#DIV/0!	#DIV/0!	#DIV/0!	#DIV/0!	#DIV/0!	#DIV/0!	#DIV/0!	#DIV/0!	#DIV/0!	#DIV/0!
														POST	16	3	0	0	0	0	0	0	0	0	19		InputMouse#	#DIV/0!	#DIV/0!	#DIV/0!	#DIV/0!	#DIV/0!	#DIV/0!	#DIV/0!	#DIV/0!	#DIV/0!	#DIV/0!	#DIV/0!	#DIV/0!	#DIV/0!	#DIV/0!	#DIV/0!	#DIV/0!	#DIV/0!	#DIV/0!	#DIV/0!	#DIV/0!	#DIV/0!	#DIV/0!
														PRE	11	6	0	0	0	0	0	0	0	0	17		InputMouse#	#DIV/0!	#DIV/0!	#DIV/0!	#DIV/0!	#DIV/0!	#DIV/0!	#DIV/0!	#DIV/0!	#DIV/0!	#DIV/0!	#DIV/0!	#DIV/0!	#DIV/0!	#DIV/0!	#DIV/0!	#DIV/0!	#DIV/0!	#DIV/0!	#DIV/0!	#DIV/0!	#DIV/0!	#DIV/0!
														SUB	21	27	0	0	0	0	0	0	0	0	48		InputMouse#	#DIV/0!	#DIV/0!	#DIV/0!	#DIV/0!	#DIV/0!	#DIV/0!	#DIV/0!	#DIV/0!	#DIV/0!	#DIV/0!	#DIV/0!	#DIV/0!	#DIV/0!	#DIV/0!	#DIV/0!	#DIV/0!	#DIV/0!	#DIV/0!	#DIV/0!	#DIV/0!	#DIV/0!	#DIV/0!
														TOTAL	162	116	0	0	0	0	0	0	0	0	278
														NORMALIZE	0.277622	0.661226	#DIV/0!	#DIV/0!	#DIV/0!	#DIV/0!	#DIV/0!	#DIV/0!	#DIV/0!	#DIV/0!
														Cerebellum
															InputMouse#1791	InputMouse#1796	InputMouse#	InputMouse#	InputMouse#	InputMouse#	InputMouse#	InputMouse#	InputMouse#	InputMouse#	TOTAL
														CBX-granular	82	13	0	0	0	0	0	0	0	0	95
														CBX-molecular	103	18	0	0	0	0	0	0	0	0	121
														DN	30	0	0	0	0	0	0	0	0	0	30
														TOTAL	215	31	0	0	0	0	0	0	0	0	246
														NORMALIZE	0.372649	0.178721	#DIV/0!	#DIV/0!	#DIV/0!	#DIV/0!	#DIV/0!	#DIV/0!	#DIV/0!	#DIV/0!
														Pons
															InputMouse#1791	InputMouse#1796	InputMouse#	InputMouse#	InputMouse#	InputMouse#	InputMouse#	InputMouse#	InputMouse#	InputMouse#	TOTAL
														P-mot	35	10	0	0	0	0	0	0	0	0	45
														P-sat	41	2	0	0	0	0	0	0	0	0	43
														P-sen	32	2	0	0	0	0	0	0	0	0	34
														TOTAL	108	14	0	0	0	0	0	0	0	0	122
														NORMALIZE	0.373696	0.16113	#DIV/0!	#DIV/0!	#DIV/0!	#DIV/0!	#DIV/0!	#DIV/0!	#DIV/0!	#DIV/0!
														Medulla
															InputMouse#1791	InputMouse#1796	InputMouse#	InputMouse#	InputMouse#	InputMouse#	InputMouse#	InputMouse#	InputMouse#	InputMouse#	TOTAL
														MY-mot	174	21	0	0	0	0	0	0	0	0	195
														MY-sat	0	1	0	0	0	0	0	0	0	0	1
														MY-sen	58	0	0	0	0	0	0	0	0	0	58
														TOTAL	232	22	0	0	0	0	0	0	0	0	254
														NORMALIZE	0.457452	0.144289	#DIV/0!	#DIV/0!	#DIV/0!	#DIV/0!	#DIV/0!	#DIV/0!	#DIV/0!	#DIV/0!
														Tracts
															InputMouse#1791	InputMouse#1796	InputMouse#	InputMouse#	InputMouse#	InputMouse#	InputMouse#	InputMouse#	InputMouse#	InputMouse#	TOTAL
														blue gray tracts	64	44	0	0	0	0	0	0	0	0	108
														light grey tracts	380	60	0	0	0	0	0	0	0	0	440
														CBX-tracts	6	1	0	0	0	0	0	0	0	0	7
														CTX tracts	11	2	0	0	0	0	0	0	0	0	13
														HY-tracts	2	2	0	0	0	0	0	0	0	0	4
														MB-tracts	13	11	0	0	0	0	0	0	0	0	24
														MY-tracts	15	5	0	0	0	0	0	0	0	0	20
														P-tracts	4	1	0	0	0	0	0	0	0	0	5
														TH-tracts	6	1	0	0	0	0	0	0	0	0	7
														ventricles	23	5	0	0	0	0	0	0	0	0	28
														TOTAL	524	132	0	0	0	0	0	0	0	0	656
														NORMALIZE	0.456502	0.382506	#DIV/0!	#DIV/0!	#DIV/0!	#DIV/0!	#DIV/0!	#DIV/0!	#DIV/0!	#DIV/0!
[truncated: 51 more columns]

## Sheet: Saline Totals
Region	InputMouse#1824	InputMouse#1793	InputMouse#	InputMouse#	InputMouse#	InputMouse#	InputMouse#	InputMouse#	InputMouse#	InputMouse#	TOTAL			Isocortex												NORMALIZE	Region	InputMouse#1824	InputMouse#1793	InputMouse#	InputMouse#	InputMouse#	InputMouse#	InputMouse#	InputMouse#	InputMouse#	InputMouse#	AVERAGE	SD
ACA	0	0	0	0	0	0	0	0	0	0	0				InputMouse#1824	InputMouse#1793	InputMouse#	InputMouse#	InputMouse#	InputMouse#	InputMouse#	InputMouse#	InputMouse#	InputMouse#	TOTAL		ACA	0	0	#DIV/0!	#DIV/0!	#DIV/0!	#DIV/0!	#DIV/0!	#DIV/0!	#DIV/0!	#DIV/0!	#DIV/0!	#DIV/0!
AI	0	1	0	0	0	0	0	0	0	0	1			ACA	0	0	0	0	0	0	0	0	0	0	0		AI	0	3.6459	#DIV/0!	#DIV/0!	#DIV/0!	#DIV/0!	#DIV/0!	#DIV/0!	#DIV/0!	#DIV/0!	#DIV/0!	#DIV/0!
ECT	0	0	0	0	0	0	0	0	0	0	0			AI	0	1	0	0	0	0	0	0	0	0	1		ECT	0	0	#DIV/0!	#DIV/0!	#DIV/0!	#DIV/0!	#DIV/0!	#DIV/0!	#DIV/0!	#DIV/0!	#DIV/0!	#DIV/0!
FRP	0	0	0	0	0	0	0	0	0	0	0			ECT	0	0	0	0	0	0	0	0	0	0	0		FRP	0	0	#DIV/0!	#DIV/0!	#DIV/0!	#DIV/0!	#DIV/0!	#DIV/0!	#DIV/0!	#DIV/0!	#DIV/0!	#DIV/0!
GU	0	0	0	0	0	0	0	0	0	0	0			FRP	0	0	0	0	0	0	0	0	0	0	0		GU	0	0	#DIV/0!	#DIV/0!	#DIV/0!	#DIV/0!	#DIV/0!	#DIV/0!	#DIV/0!	#DIV/0!	#DIV/0!	#DIV/0!
ILA2/3	0	0	0	0	0	0	0	0	0	0	0			GU	0	0	0	0	0	0	0	0	0	0	0		ILA2/3	0	0	#DIV/0!	#DIV/0!	#DIV/0!	#DIV/0!	#DIV/0!	#DIV/0!	#DIV/0!	#DIV/0!	#DIV/0!	#DIV/0!
MO	0	0	0	0	0	0	0	0	0	0	0			ILA2/3	0	0	0	0	0	0	0	0	0	0	0		MO	0	0	#DIV/0!	#DIV/0!	#DIV/0!	#DIV/0!	#DIV/0!	#DIV/0!	#DIV/0!	#DIV/0!	#DIV/0!	#DIV/0!
ORB	2	0	0	0	0	0	0	0	0	0	2			MO	0	0	0	0	0	0	0	0	0	0	0		ORB	29.7229	0	#DIV/0!	#DIV/0!	#DIV/0!	#DIV/0!	#DIV/0!	#DIV/0!	#DIV/0!	#DIV/0!	#DIV/0!	#DIV/0!
PL	0	0	0	0	0	0	0	0	0	0	0			ORB	2	0	0	0	0	0	0	0	0	0	2		PL	0	0	#DIV/0!	#DIV/0!	#DIV/0!	#DIV/0!	#DIV/0!	#DIV/0!	#DIV/0!	#DIV/0!	#DIV/0!	#DIV/0!
PTLp	0	0	0	0	0	0	0	0	0	0	0			PL	0	0	0	0	0	0	0	0	0	0	0		PTLp	0	0	#DIV/0!	#DIV/0!	#DIV/0!	#DIV/0!	#DIV/0!	#DIV/0!	#DIV/0!	#DIV/0!	#DIV/0!	#DIV/0!
RSP	0	0	0	0	0	0	0	0	0	0	0			PTLp	0	0	0	0	0	0	0	0	0	0	0		RSP	0	0	#DIV/0!	#DIV/0!	#DIV/0!	#DIV/0!	#DIV/0!	#DIV/0!	#DIV/0!	#DIV/0!	#DIV/0!	#DIV/0!
SS	0	0	0	0	0	0	0	0	0	0	0			RSP	0	0	0	0	0	0	0	0	0	0	0		SS	0	0	#DIV/0!	#DIV/0!	#DIV/0!	#DIV/0!	#DIV/0!	#DIV/0!	#DIV/0!	#DIV/0!	#DIV/0!	#DIV/0!
VIS	0	0	0	0	0	0	0	0	0	0	0			SS	0	0	0	0	0	0	0	0	0	0	0		VIS	0	0	#DIV/0!	#DIV/0!	#DIV/0!	#DIV/0!	#DIV/0!	#DIV/0!	#DIV/0!	#DIV/0!	#DIV/0!	#DIV/0!
VISC	0	0	0	0	0	0	0	0	0	0	0			VIS	0	0	0	0	0	0	0	0	0	0	0		VISC	0	0	#DIV/0!	#DIV/0!	#DIV/0!	#DIV/0!	#DIV/0!	#DIV/0!	#DIV/0!	#DIV/0!	#DIV/0!	#DIV/0!
CP	0	0	0	0	0	0	0	0	0	0	0			VISC	0	0	0	0	0	0	0	0	0	0	0		CP	0	0	#DIV/0!	#DIV/0!	#DIV/0!	#DIV/0!	#DIV/0!	#DIV/0!	#DIV/0!	#DIV/0!	#DIV/0!	#DIV/0!
LS	0	2	0	0	0	0	0	0	0	0	2			TOTAL	2	1	0	0	0	0	0	0	0	0	3		LS	0	6.59682	#DIV/0!	#DIV/0!	#DIV/0!	#DIV/0!	#DIV/0!	#DIV/0!	#DIV/0!	#DIV/0!	#DIV/0!	#DIV/0!
sAMY	0	2	0	0	0	0	0	0	0	0	2			NORMALIZE	2.25778	0.125432	#DIV/0!	#DIV/0!	#DIV/0!	#DIV/0!	#DIV/0!	#DIV/0!	#DIV/0!	#DIV/0!			sAMY	0	6.90981	#DIV/0!	#DIV/0!	#DIV/0!	#DIV/0!	#DIV/0!	#DIV/0!	#DIV/0!	#DIV/0!	#DIV/0!	#DIV/0!
STRv	0	0	0	0	0	0	0	0	0	0	0			Striatum													STRv	0	0	#DIV/0!	#DIV/0!	#DIV/0!	#DIV/0!	#DIV/0!	#DIV/0!	#DIV/0!	#DIV/0!	#DIV/0!	#DIV/0!
GP	0	0	0	0	0	0	0	0	0	0	0				InputMouse#1824	InputMouse#1793	InputMouse#	InputMouse#	InputMouse#	InputMouse#	InputMouse#	InputMouse#	InputMouse#	InputMouse#	TOTAL		GP	0	0	#DIV/0!	#DIV/0!	#DIV/0!	#DIV/0!	#DIV/0!	#DIV/0!	#DIV/0!	#DIV/0!	#DIV/0!	#DIV/0!
PALc	0	0	0	0	0	0	0	0	0	0	0			CP	0	0	0	0	0	0	0	0	0	0	0		PALc	0	0	#DIV/0!	#DIV/0!	#DIV/0!	#DIV/0!	#DIV/0!	#DIV/0!	#DIV/0!	#DIV/0!	#DIV/0!	#DIV/0!
PALm	0	0	0	0	0	0	0	0	0	0	0			LS	0	2	0	0	0	0	0	0	0	0	2		PALm	0	0	#DIV/0!	#DIV/0!	#DIV/0!	#DIV/0!	#DIV/0!	#DIV/0!	#DIV/0!	#DIV/0!	#DIV/0!	#DIV/0!
PALv	0	3	0	0	0	0	0	0	0	0	3			sAMY	0	2	0	0	0	0	0	0	0	0	2		PALv	0	13.2991	#DIV/0!	#DIV/0!	#DIV/0!	#DIV/0!	#DIV/0!	#DIV/0!	#DIV/0!	#DIV/0!	#DIV/0!	#DIV/0!
LZ/ME	0	0	0	0	0	0	0	0	0	0	0			STRv	0	0	0	0	0	0	0	0	0	0	0		LZ/ME	0	0	#DIV/0!	#DIV/0!	#DIV/0!	#DIV/0!	#DIV/0!	#DIV/0!	#DIV/0!	#DIV/0!	#DIV/0!	#DIV/0!
MEZ	0	0	0	0	0	0	0	0	0	0	0			TOTAL	0	4	0	0	0	0	0	0	0	0	4		MEZ	0	0	#DIV/0!	#DIV/0!	#DIV/0!	#DIV/0!	#DIV/0!	#DIV/0!	#DIV/0!	#DIV/0!	#DIV/0!	#DIV/0!
PVR	0	0	0	0	0	0	0	0	0	0	0			NORMALIZE	0	1.33003	#DIV/0!	#DIV/0!	#DIV/0!	#DIV/0!	#DIV/0!	#DIV/0!	#DIV/0!	#DIV/0!			PVR	0	0	#DIV/0!	#DIV/0!	#DIV/0!	#DIV/0!	#DIV/0!	#DIV/0!	#DIV/0!	#DIV/0!	#DIV/0!	#DIV/0!
PVZ	0	0	0	0	0	0	0	0	0	0	0			Pallidum													PVZ	0	0	#DIV/0!	#DIV/0!	#DIV/0!	#DIV/0!	#DIV/0!	#DIV/0!	#DIV/0!	#DIV/0!	#DIV/0!	#DIV/0!
AOB-dark/ Nlot	0	0	0	0	0	0	0	0	0	0	0				InputMouse#1824	InputMouse#1793	InputMouse#	InputMouse#	InputMouse#	InputMouse#	InputMouse#	InputMouse#	InputMouse#	InputMouse#	TOTAL		AOB-dark/ Nlot	0	0	#DIV/0!	#DIV/0!	#DIV/0!	#DIV/0!	#DIV/0!	#DIV/0!	#DIV/0!	#DIV/0!	#DIV/0!	#DIV/0!
AOB-light	0	0	0	0	0	0	0	0	0	0	0			GP	0	0	0	0	0	0	0	0	0	0	0		AOB-light	0	0	#DIV/0!	#DIV/0!	#DIV/0!	#DIV/0!	#DIV/0!	#DIV/0!	#DIV/0!	#DIV/0!	#DIV/0!	#DIV/0!
AON	0	0	0	0	0	0	0	0	0	0	0			PALc	0	0	0	0	0	0	0	0	0	0	0		AON	0	0	#DIV/0!	#DIV/0!	#DIV/0!	#DIV/0!	#DIV/0!	#DIV/0!	#DIV/0!	#DIV/0!	#DIV/0!	#DIV/0!
COA	0	0	0	0	0	0	0	0	0	0	0			PALm	0	0	0	0	0	0	0	0	0	0	0		COA	0	0	#DIV/0!	#DIV/0!	#DIV/0!	#DIV/0!	#DIV/0!	#DIV/0!	#DIV/0!	#DIV/0!	#DIV/0!	#DIV/0!
MOB-dark	0	0	0	0	0	0	0	0	0	0	0			PALv	0	3	0	0	0	0	0	0	0	0	3		MOB-dark	0	0	#DIV/0!	#DIV/0!	#DIV/0!	#DIV/0!	#DIV/0!	#DIV/0!	#DIV/0!	#DIV/0!	#DIV/0!	#DIV/0!
MOB-light	0	0	0	0	0	0	0	0	0	0	0			TOTAL	0	3	0	0	0	0	0	0	0	0	3		MOB-light	0	0	#DIV/0!	#DIV/0!	#DIV/0!	#DIV/0!	#DIV/0!	#DIV/0!	#DIV/0!	#DIV/0!	#DIV/0!	#DIV/0!
PAA	0	0	0	0	0	0	0	0	0	0	0			NORMALIZE	0	3.99795	#DIV/0!	#DIV/0!	#DIV/0!	#DIV/0!	#DIV/0!	#DIV/0!	#DIV/0!	#DIV/0!			PAA	0	0	#DIV/0!	#DIV/0!	#DIV/0!	#DIV/0!	#DIV/0!	#DIV/0!	#DIV/0!	#DIV/0!	#DIV/0!	#DIV/0!
PIR	0	1	0	0	0	0	0	0	0	0	1			Hypothalamus													PIR	0	1.59916	#DIV/0!	#DIV/0!	#DIV/0!	#DIV/0!	#DIV/0!	#DIV/0!	#DIV/0!	#DIV/0!	#DIV/0!	#DIV/0!
TR	0	0	0	0	0	0	0	0	0	0	0				InputMouse#1824	InputMouse#1793	InputMouse#	InputMouse#	InputMouse#	InputMouse#	InputMouse#	InputMouse#	InputMouse#	InputMouse#	TOTAL		TR	0	0	#DIV/0!	#DIV/0!	#DIV/0!	#DIV/0!	#DIV/0!	#DIV/0!	#DIV/0!	#DIV/0!	#DIV/0!	#DIV/0!
TT	0	0	0	0	0	0	0	0	0	0	0			LZ/ME	0	0	0	0	0	0	0	0	0	0	0		TT	0	0	#DIV/0!	#DIV/0!	#DIV/0!	#DIV/0!	#DIV/0!	#DIV/0!	#DIV/0!	#DIV/0!	#DIV/0!	#DIV/0!
BLA	0	0	0	0	0	0	0	0	0	0	0			MEZ	0	0	0	0	0	0	0	0	0	0	0		BLA	0	0	#DIV/0!	#DIV/0!	#DIV/0!	#DIV/0!	#DIV/0!	#DIV/0!	#DIV/0!	#DIV/0!	#DIV/0!	#DIV/0!
BMA	0	0	0	0	0	0	0	0	0	0	0			PVR	0	0	0	0	0	0	0	0	0	0	0		BMA	0	0	#DIV/0!	#DIV/0!	#DIV/0!	#DIV/0!	#DIV/0!	#DIV/0!	#DIV/0!	#DIV/0!	#DIV/0!	#DIV/0!
CLA	0	0	0	0	0	0	0	0	0	0	0			PVZ	0	0	0	0	0	0	0	0	0	0	0		CLA	0	0	#DIV/0!	#DIV/0!	#DIV/0!	#DIV/0!	#DIV/0!	#DIV/0!	#DIV/0!	#DIV/0!	#DIV/0!	#DIV/0!
EP	0	0	0	0	0	0	0	0	0	0	0			TOTAL	0	0	0	0	0	0	0	0	0	0	0		EP	0	0	#DIV/0!	#DIV/0!	#DIV/0!	#DIV/0!	#DIV/0!	#DIV/0!	#DIV/0!	#DIV/0!	#DIV/0!	#DIV/0!
PA	0	1	0	0	0	0	0	0	0	0	1			NORMALIZE	0	0	#DIV/0!	#DIV/0!	#DIV/0!	#DIV/0!	#DIV/0!	#DIV/0!	#DIV/0!	#DIV/0!			PA	0	15.2855	#DIV/0!	#DIV/0!	#DIV/0!	#DIV/0!	#DIV/0!	#DIV/0!	#DIV/0!	#DIV/0!	#DIV/0!	#DIV/0!
DOR-pm	0	0	0	0	0	0	0	0	0	0	0			Olfactory Areas													DOR-pm	0	0	#DIV/0!	#DIV/0!	#DIV/0!	#DIV/0!	#DIV/0!	#DIV/0!	#DIV/0!	#DIV/0!	#DIV/0!	#DIV/0!
DOR-sm	0	0	0	0	0	0	0	0	0	0	0				InputMouse#1824	InputMouse#1793	InputMouse#	InputMouse#	InputMouse#	InputMouse#	InputMouse#	InputMouse#	InputMouse#	InputMouse#	TOTAL		DOR-sm	0	0	#DIV/0!	#DIV/0!	#DIV/0!	#DIV/0!	#DIV/0!	#DIV/0!	#DIV/0!	#DIV/0!	#DIV/0!	#DIV/0!
LA	0	0	0	0	0	0	0	0	0	0	0			AOB-dark/ Nlot	0	0	0	0	0	0	0	0	0	0	0		LA	0	0	#DIV/0!	#DIV/0!	#DIV/0!	#DIV/0!	#DIV/0!	#DIV/0!	#DIV/0!	#DIV/0!	#DIV/0!	#DIV/0!
MB-mot	0	0	0	0	0	0	0	0	0	0	0			AOB-light	0	0	0	0	0	0	0	0	0	0	0		MB-mot	0	0	#DIV/0!	#DIV/0!	#DIV/0!	#DIV/0!	#DIV/0!	#DIV/0!	#DIV/0!	#DIV/0!	#DIV/0!	#DIV/0!
MB-sen	0	2	0	0	0	0	0	0	0	0	2			AON	0	0	0	0	0	0	0	0	0	0	0		MB-sen	0	2.9113	#DIV/0!	#DIV/0!	#DIV/0!	#DIV/0!	#DIV/0!	#DIV/0!	#DIV/0!	#DIV/0!	#DIV/0!	#DIV/0!
MB-sta	0	0	0	0	0	0	0	0	0	0	0			COA	0	0	0	0	0	0	0	0	0	0	0		MB-sta	0	0	#DIV/0!	#DIV/0!	#DIV/0!	#DIV/0!	#DIV/0!	#DIV/0!	#DIV/0!	#DIV/0!	#DIV/0!	#DIV/0!
ENT	0	1	0	0	0	0	0	0	0	0	1			MOB-dark	0	0	0	0	0	0	0	0	0	0	0		ENT	0	2.55291	#DIV/0!	#DIV/0!	#DIV/0!	#DIV/0!	#DIV/0!	#DIV/0!	#DIV/0!	#DIV/0!	#DIV/0!	#DIV/0!
CA123_pyramidal/DG_granule	0	1	0	0	0	0	0	0	0	0	1			MOB-light	0	0	0	0	0	0	0	0	0	0	0		CA123_pyramidal/DG_granule	0	3.249	#DIV/0!	#DIV/0!	#DIV/0!	#DIV/0!	#DIV/0!	#DIV/0!	#DIV/0!	#DIV/0!	#DIV/0!	#DIV/0!
CA123 / DG	0	14	0	0	0	0	0	0	0	0	14			PAA	0	0	0	0	0	0	0	0	0	0	0		CA123 / DG	0	11.7226	#DIV/0!	#DIV/0!	#DIV/0!	#DIV/0!	#DIV/0!	#DIV/0!	#DIV/0!	#DIV/0!	#DIV/0!	#DIV/0!
PAR	0	0	0	0	0	0	0	0	0	0	0			PIR	0	1	0	0	0	0	0	0	0	0	1		PAR	0	0	#DIV/0!	#DIV/0!	#DIV/0!	#DIV/0!	#DIV/0!	#DIV/0!	#DIV/0!	#DIV/0!	#DIV/0!	#DIV/0!
POST	0	0	0	0	0	0	0	0	0	0	0			TR	0	0	0	0	0	0	0	0	0	0	0		POST	0	0	#DIV/0!	#DIV/0!	#DIV/0!	#DIV/0!	#DIV/0!	#DIV/0!	#DIV/0!	#DIV/0!	#DIV/0!	#DIV/0!
PRE	0	0	0	0	0	0	0	0	0	0	0			TT	0	0	0	0	0	0	0	0	0	0	0		PRE	0	0	#DIV/0!	#DIV/0!	#DIV/0!	#DIV/0!	#DIV/0!	#DIV/0!	#DIV/0!	#DIV/0!	#DIV/0!	#DIV/0!
SUB	0	0	0	0	0	0	0	0	0	0	0			TOTAL	0	1	0	0	0	0	0	0	0	0	1		SUB	0	0	#DIV/0!	#DIV/0!	#DIV/0!	#DIV/0!	#DIV/0!	#DIV/0!	#DIV/0!	#DIV/0!	#DIV/0!	#DIV/0!
CBX-granular	0	5	0	0	0	0	0	0	0	0	5			NORMALIZE	0	0.280077	#DIV/0!	#DIV/0!	#DIV/0!	#DIV/0!	#DIV/0!	#DIV/0!	#DIV/0!	#DIV/0!			CBX-granular	0	2.8221	#DIV/0!	#DIV/0!	#DIV/0!	#DIV/0!	#DIV/0!	#DIV/0!	#DIV/0!	#DIV/0!	#DIV/0!	#DIV/0!
CBX-molecular	0	3	0	0	0	0	0	0	0	0	3			Cortical Subplate													CBX-molecular	0	1.44399	#DIV/0!	#DIV/0!	#DIV/0!	#DIV/0!	#DIV/0!	#DIV/0!	#DIV/0!	#DIV/0!	#DIV/0!	#DIV/0!
DN	0	0	0	0	0	0	0	0	0	0	0				InputMouse#1824	InputMouse#1793	InputMouse#	InputMouse#	InputMouse#	InputMouse#	InputMouse#	InputMouse#	InputMouse#	InputMouse#	TOTAL		DN	0	0	#DIV/0!	#DIV/0!	#DIV/0!	#DIV/0!	#DIV/0!	#DIV/0!	#DIV/0!	#DIV/0!	#DIV/0!	#DIV/0!
P-mot	0	0	0	0	0	0	0	0	0	0	0			BLA	0	0	0	0	0	0	0	0	0	0	0		P-mot	0	0	#DIV/0!	#DIV/0!	#DIV/0!	#DIV/0!	#DIV/0!	#DIV/0!	#DIV/0!	#DIV/0!	#DIV/0!	#DIV/0!
P-sat	0	0	0	0	0	0	0	0	0	0	0			BMA	0	0	0	0	0	0	0	0	0	0	0		P-sat	0	0	#DIV/0!	#DIV/0!	#DIV/0!	#DIV/0!	#DIV/0!	#DIV/0!	#DIV/0!	#DIV/0!	#DIV/0!	#DIV/0!
P-sen	0	0	0	0	0	0	0	0	0	0	0			CLA	0	0	0	0	0	0	0	0	0	0	0		P-sen	0	0	#DIV/0!	#DIV/0!	#DIV/0!	#DIV/0!	#DIV/0!	#DIV/0!	#DIV/0!	#DIV/0!	#DIV/0!	#DIV/0!
MY-mot	0	0	0	0	0	0	0	0	0	0	0			EP	0	0	0	0	0	0	0	0	0	0	0		MY-mot	0	0	#DIV/0!	#DIV/0!	#DIV/0!	#DIV/0!	#DIV/0!	#DIV/0!	#DIV/0!	#DIV/0!	#DIV/0!	#DIV/0!
MY-sat	0	0	0	0	0	0	0	0	0	0	0			PA	0	1	0	0	0	0	0	0	0	0	1		MY-sat	0	0	#DIV/0!	#DIV/0!	#DIV/0!	#DIV/0!	#DIV/0!	#DIV/0!	#DIV/0!	#DIV/0!	#DIV/0!	#DIV/0!
MY-sen	0	0	0	0	0	0	0	0	0	0	0			TOTAL	0	1	0	0	0	0	0	0	0	0	1		MY-sen	0	0	#DIV/0!	#DIV/0!	#DIV/0!	#DIV/0!	#DIV/0!	#DIV/0!	#DIV/0!	#DIV/0!	#DIV/0!	#DIV/0!
blue gray tracts	0	0	0	0	0	0	0	0	0	0	0			NORMALIZE	0	1.48267	#DIV/0!	#DIV/0!	#DIV/0!	#DIV/0!	#DIV/0!	#DIV/0!	#DIV/0!	#DIV/0!			blue gray tracts	0	0	#DIV/0!	#DIV/0!	#DIV/0!	#DIV/0!	#DIV/0!	#DIV/0!	#DIV/0!	#DIV/0!	#DIV/0!	#DIV/0!
light grey tracts	0	0	0	0	0	0	0	0	0	0	0			Thalamus													light grey tracts	0	0	#DIV/0!	#DIV/0!	#DIV/0!	#DIV/0!	#DIV/0!	#DIV/0!	#DIV/0!	#DIV/0!	#DIV/0!	#DIV/0!
CBX-tracts	2	0	0	0	0	0	0	0	0	0	2				InputMouse#1824	InputMouse#1793	InputMouse#	InputMouse#	InputMouse#	InputMouse#	InputMouse#	InputMouse#	InputMouse#	InputMouse#	TOTAL		CBX-tracts	152.819	0	#DIV/0!	#DIV/0!	#DIV/0!	#DIV/0!	#DIV/0!	#DIV/0!	#DIV/0!	#DIV/0!	#DIV/0!	#DIV/0!
CTX tracts	0	0	0	0	0	0	0	0	0	0	0			DOR-pm	0	0	0	0	0	0	0	0	0	0	0		CTX tracts	0	0	#DIV/0!	#DIV/0!	#DIV/0!	#DIV/0!	#DIV/0!	#DIV/0!	#DIV/0!	#DIV/0!	#DIV/0!	#DIV/0!
HY-tracts	0	0	0	0	0	0	0	0	0	0	0			DOR-sm	0	0	0	0	0	0	0	0	0	0	0		HY-tracts	0	0	#DIV/0!	#DIV/0!	#DIV/0!	#DIV/0!	#DIV/0!	#DIV/0!	#DIV/0!	#DIV/0!	#DIV/0!	#DIV/0!
MB-tracts	0	0	0	0	0	0	0	0	0	0	0			TOTAL	0	0	0	0	0	0	0	0	0	0	0		MB-tracts	0	0	#DIV/0!	#DIV/0!	#DIV/0!	#DIV/0!	#DIV/0!	#DIV/0!	#DIV/0!	#DIV/0!	#DIV/0!	#DIV/0!
MY-tracts	0	0	0	0	0	0	0	0	0	0	0			NORMALIZE	0	0	#DIV/0!	#DIV/0!	#DIV/0!	#DIV/0!	#DIV/0!	#DIV/0!	#DIV/0!	#DIV/0!			MY-tracts	0	0	#DIV/0!	#DIV/0!	#DIV/0!	#DIV/0!	#DIV/0!	#DIV/0!	#DIV/0!	#DIV/0!	#DIV/0!	#DIV/0!
P-tracts	0	0	0	0	0	0	0	0	0	0	0			Midbrain													P-tracts	0	0	#DIV/0!	#DIV/0!	#DIV/0!	#DIV/0!	#DIV/0!	#DIV/0!	#DIV/0!	#DIV/0!	#DIV/0!	#DIV/0!
TH-tracts	0	0	0	0	0	0	0	0	0	0	0				InputMouse#1824	InputMouse#1793	InputMouse#	InputMouse#	InputMouse#	InputMouse#	InputMouse#	InputMouse#	InputMouse#	InputMouse#	TOTAL		TH-tracts	0	0	#DIV/0!	#DIV/0!	#DIV/0!	#DIV/0!	#DIV/0!	#DIV/0!	#DIV/0!	#DIV/0!	#DIV/0!	#DIV/0!
ventricles	0	0	0	0	0	0	0	0	0	0	0			LA	0	0	0	0	0	0	0	0	0	0	0		ventricles	#VALUE!	#VALUE!	#DIV/0!	#DIV/0!	#DIV/0!	#DIV/0!	#DIV/0!	#DIV/0!	#DIV/0!	#DIV/0!	#VALUE!	#VALUE!
TOTAL	4	36	0	0	0	0	0	0	0	0	40			MB-mot	0	0	0	0	0	0	0	0	0	0	0
														MB-sen	0	2	0	0	0	0	0	0	0	0	2
														MB-sta	0	0	0	0	0	0	0	0	0	0	0
														TOTAL	0	2	0	0	0	0	0	0	0	0	2		Region	ACA	AI	ECT	FRP	GU	ILA2/3	MO	ORB	PL	PTLp	RSP	SS	VIS	VISC	CP	LS	sAMY	STRv	GP	PALc	PALm	PALv
														NORMALIZE	0	0.722834	#DIV/0!	#DIV/0!	#DIV/0!	#DIV/0!	#DIV/0!	#DIV/0!	#DIV/0!	#DIV/0!			InputMouse#1824	0	0	0	0	0	0	0	29.7229	0	0	0	0	0	0	0	0	0	0	0	0	0	0
														Hippocampal Formation													InputMouse#1793	0	3.6459	0	0	0	0	0	0	0	0	0	0	0	0	0	6.59682	6.90981	0	0	0	0	13.2991
															InputMouse#1824	InputMouse#1793	InputMouse#	InputMouse#	InputMouse#	InputMouse#	InputMouse#	InputMouse#	InputMouse#	InputMouse#	TOTAL		InputMouse#	#DIV/0!	#DIV/0!	#DIV/0!	#DIV/0!	#DIV/0!	#DIV/0!	#DIV/0!	#DIV/0!	#DIV/0!	#DIV/0!	#DIV/0!	#DIV/0!	#DIV/0!	#DIV/0!	#DIV/0!	#DIV/0!	#DIV/0!	#DIV/0!	#DIV/0!	#DIV/0!	#DIV/0!	#DIV/0!
														ENT	0	1	0	0	0	0	0	0	0	0	1		InputMouse#	#DIV/0!	#DIV/0!	#DIV/0!	#DIV/0!	#DIV/0!	#DIV/0!	#DIV/0!	#DIV/0!	#DIV/0!	#DIV/0!	#DIV/0!	#DIV/0!	#DIV/0!	#DIV/0!	#DIV/0!	#DIV/0!	#DIV/0!	#DIV/0!	#DIV/0!	#DIV/0!	#DIV/0!	#DIV/0!
														CA123_pyramidal/DG_granule	0	1	0	0	0	0	0	0	0	0	1		InputMouse#	#DIV/0!	#DIV/0!	#DIV/0!	#DIV/0!	#DIV/0!	#DIV/0!	#DIV/0!	#DIV/0!	#DIV/0!	#DIV/0!	#DIV/0!	#DIV/0!	#DIV/0!	#DIV/0!	#DIV/0!	#DIV/0!	#DIV/0!	#DIV/0!	#DIV/0!	#DIV/0!	#DIV/0!	#DIV/0!
														CA123 / DG	0	14	0	0	0	0	0	0	0	0	14		InputMouse#	#DIV/0!	#DIV/0!	#DIV/0!	#DIV/0!	#DIV/0!	#DIV/0!	#DIV/0!	#DIV/0!	#DIV/0!	#DIV/0!	#DIV/0!	#DIV/0!	#DIV/0!	#DIV/0!	#DIV/0!	#DIV/0!	#DIV/0!	#DIV/0!	#DIV/0!	#DIV/0!	#DIV/0!	#DIV/0!
														PAR	0	0	0	0	0	0	0	0	0	0	0		InputMouse#	#DIV/0!	#DIV/0!	#DIV/0!	#DIV/0!	#DIV/0!	#DIV/0!	#DIV/0!	#DIV/0!	#DIV/0!	#DIV/0!	#DIV/0!	#DIV/0!	#DIV/0!	#DIV/0!	#DIV/0!	#DIV/0!	#DIV/0!	#DIV/0!	#DIV/0!	#DIV/0!	#DIV/0!	#DIV/0!
														POST	0	0	0	0	0	0	0	0	0	0	0		InputMouse#	#DIV/0!	#DIV/0!	#DIV/0!	#DIV/0!	#DIV/0!	#DIV/0!	#DIV/0!	#DIV/0!	#DIV/0!	#DIV/0!	#DIV/0!	#DIV/0!	#DIV/0!	#DIV/0!	#DIV/0!	#DIV/0!	#DIV/0!	#DIV/0!	#DIV/0!	#DIV/0!	#DIV/0!	#DIV/0!
														PRE	0	0	0	0	0	0	0	0	0	0	0		InputMouse#	#DIV/0!	#DIV/0!	#DIV/0!	#DIV/0!	#DIV/0!	#DIV/0!	#DIV/0!	#DIV/0!	#DIV/0!	#DIV/0!	#DIV/0!	#DIV/0!	#DIV/0!	#DIV/0!	#DIV/0!	#DIV/0!	#DIV/0!	#DIV/0!	#DIV/0!	#DIV/0!	#DIV/0!	#DIV/0!
														SUB	0	0	0	0	0	0	0	0	0	0	0		InputMouse#	#DIV/0!	#DIV/0!	#DIV/0!	#DIV/0!	#DIV/0!	#DIV/0!	#DIV/0!	#DIV/0!	#DIV/0!	#DIV/0!	#DIV/0!	#DIV/0!	#DIV/0!	#DIV/0!	#DIV/0!	#DIV/0!	#DIV/0!	#DIV/0!	#DIV/0!	#DIV/0!	#DIV/0!	#DIV/0!
														TOTAL	0	16	0	0	0	0	0	0	0	0	16
														NORMALIZE	0	6.52127	#DIV/0!	#DIV/0!	#DIV/0!	#DIV/0!	#DIV/0!	#DIV/0!	#DIV/0!	#DIV/0!
														Cerebellum
															InputMouse#1824	InputMouse#1793	InputMouse#	InputMouse#	InputMouse#	InputMouse#	InputMouse#	InputMouse#	InputMouse#	InputMouse#	TOTAL
														CBX-granular	0	5	0	0	0	0	0	0	0	0	5
														CBX-molecular	0	3	0	0	0	0	0	0	0	0	3
														DN	0	0	0	0	0	0	0	0	0	0	0
														TOTAL	0	8	0	0	0	0	0	0	0	0	8
														NORMALIZE	0	2.00527	#DIV/0!	#DIV/0!	#DIV/0!	#DIV/0!	#DIV/0!	#DIV/0!	#DIV/0!	#DIV/0!
														Pons
															InputMouse#1824	InputMouse#1793	InputMouse#	InputMouse#	InputMouse#	InputMouse#	InputMouse#	InputMouse#	InputMouse#	InputMouse#	TOTAL
														P-mot	0	0	0	0	0	0	0	0	0	0	0
														P-sat	0	0	0	0	0	0	0	0	0	0	0
														P-sen	0	0	0	0	0	0	0	0	0	0	0
														TOTAL	0	0	0	0	0	0	0	0	0	0	0
														NORMALIZE	0	0	#DIV/0!	#DIV/0!	#DIV/0!	#DIV/0!	#DIV/0!	#DIV/0!	#DIV/0!	#DIV/0!
														Medulla
															InputMouse#1824	InputMouse#1793	InputMouse#	InputMouse#	InputMouse#	InputMouse#	InputMouse#	InputMouse#	InputMouse#	InputMouse#	TOTAL
														MY-mot	0	0	0	0	0	0	0	0	0	0	0
														MY-sat	0	0	0	0	0	0	0	0	0	0	0
														MY-sen	0	0	0	0	0	0	0	0	0	0	0
														TOTAL	0	0	0	0	0	0	0	0	0	0	0
														NORMALIZE	0	0	#DIV/0!	#DIV/0!	#DIV/0!	#DIV/0!	#DIV/0!	#DIV/0!	#DIV/0!	#DIV/0!
														Tracts
															InputMouse#1824	InputMouse#1793	InputMouse#	InputMouse#	InputMouse#	InputMouse#	InputMouse#	InputMouse#	InputMouse#	InputMouse#	TOTAL
														blue gray tracts	0	0	0	0	0	0	0	0	0	0	0
														light grey tracts	0	0	0	0	0	0	0	0	0	0	0
														CBX-tracts	2	0	0	0	0	0	0	0	0	0	2
														CTX tracts	0	0	0	0	0	0	0	0	0	0	0
														HY-tracts	0	0	0	0	0	0	0	0	0	0	0
														MB-tracts	0	0	0	0	0	0	0	0	0	0	0
														MY-tracts	0	0	0	0	0	0	0	0	0	0	0
														P-tracts	0	0	0	0	0	0	0	0	0	0	0
														TH-tracts	0	0	0	0	0	0	0	0	0	0	0
														ventricles	0	0	0	0	0	0	0	0	0	0	0
														TOTAL	2	0	0	0	0	0	0	0	0	0	2
														NORMALIZE	3.72959	0	#DIV/0!	#DIV/0!	#DIV/0!	#DIV/0!	#DIV/0!	#DIV/0!	#DIV/0!	#DIV/0!
[truncated: 51 more columns]

## Sheet: Individual Regions Transpose
PcA
Region	ACA	AI	ECT	FRP	GU	ILA2/3	MO	ORB	PL	PTLp	RSP	SS	VIS	VISC	CP	LS	sAMY	STRv	GP	PALc	PALm	PALv	LZ/ME	MEZ	PVR	PVZ	AOB-dark/ Nlot	AOB-light	AON	COA	MOB-dark	MOB-light	PAA	PIR	TR	TT	BLA	BMA	CLA	EP	PA	DOR-pm	DOR-sm	LA	MB-mot	MB-sen	MB-sta	ENT	CA123_pyramidal/DG_granule
InputMouse#1760	0	0	0	0	0	0	1.04861	0	0	0	0	4.01756	7.71466	0	2.11106	0	0	1.37851	0	0	0	0	2.14786	0	0	0	#REF!	#REF!	#REF!	#REF!	#REF!	#REF!	#REF!	#REF!	#REF!	#REF!	0	0	0	0	0	0	0	0	0	0	0	5.74406	7.31025
InputMouse#1761	0	0	0	0	0	0	0.610103	3.2425	0	0	2.79848	0	1.6832	0	2.86592	0	2.26139	0.802043	33.6942	0	0	2.90163	0	0	0	17.6514	#REF!	#REF!	#REF!	#REF!	#REF!	#REF!	#REF!	#REF!	#REF!	#REF!	0	0	0	0	0	0.624688	1.26365	0	0	0.952788	0	0	0
InputMouse#1779	0	1.28679	0	0	0	0	0.986931	0	0	0	0	4.72654	1.21014	0	1.54535	0	2.43876	6.05464	0	0	0	3.12921	0.67384	0	0	0	#REF!	#REF!	#REF!	#REF!	#REF!	#REF!	#REF!	#REF!	#REF!	#REF!	2.2252	0	0	0	0	0	0.681381	0	0.380095	0	0	0	0
InputMouse#1780	0	3.60044	2.46811	2.26648	1.63812	0	0.418399	1.63068	0	2.10995	1.1515	1.24234	2.6934	1.89031	3.93082	5.03398	1.55083	0.770041	0.577675	1.58691	0	2.38788	0.857003	1.34831	1.24202	0	#REF!	#REF!	#REF!	#REF!	#REF!	#REF!	#REF!	#REF!	#REF!	#REF!	3.39606	10.1128	2.20878	1.6854	1.37227	2.82745	1.03991	0	0.77346	1.17613	0.94974	2.52108	0.583361
InputMouse#1789	0.796626	0	0	0	4.72579	0	2.17267	0.855335	0	8.11598	0.369105	3.81524	4.6621	0	0.485999	0	6.26357	2.22149	0	0	1.29696	8.03689	0.494472	0	1.79154	0	#REF!	#REF!	#REF!	#REF!	#REF!	#REF!	#REF!	#REF!	#REF!	#REF!	1.63288	0	4.24807	0	0	0.247179	0	0	0.836756	0	1.36995	1.32237	0
InputMouse#1790	0	0	0	0	0	0	0.666668	0.787361	0	0	0	0	0	0	8.20191	0	0	10.809	0	1.40475	0	0	0	0	0	0	#REF!	#REF!	#REF!	#REF!	#REF!	#REF!	#REF!	#REF!	#REF!	#REF!	0	0	3.91047	0.895158	0	0	0.920542	0	0	0	0	4.86913	0
InputMouse#1794	0	1.27018	0	11.7272	2.11899	0	2.16488	2.87641	0	2.72933	0.331004	1.60702	3.18541	1.22261	5.81109	0	0	0.996086	0	0	0	1.54442	0.44343	0	0	0	#REF!	#REF!	#REF!	#REF!	#REF!	#REF!	#REF!	#REF!	#REF!	#REF!	0.732162	0	8.57151	3.92426	0	0.110832	0.672589	0	0.312659	0.845215	0	3.55761	0.377303
InputMouse#1816	1.16025	0.60168	0	7.73748	0.43018	0.963924	1.30751	0.739666	0.850036	0.738783	0.235192	0.67354	1.49544	0	2.65438	1.16643	0.488709	1.2422	1.97212	1.94475	0.472241	2.71731	8.73212	0.849781	0.489243	0	#REF!	#REF!	#REF!	#REF!	#REF!	#REF!	#REF!	#REF!	#REF!	#REF!	0	1.13815	0.966735	1.06223	0	2.22752	1.04684	0.698838	0.507789	0.377496	1.12234	1.92597	0.459583
InputMouse#1798	0	2.98301	0	0	0	0	1.3346	1.35104	0	0	2.91509	2.00878	5.26	0	0.767658	0	2.82674	1.00255	2.63236	0	6.14584	0	0.781041	0	2.82983	0	#REF!	#REF!	#REF!	#REF!	#REF!	#REF!	#REF!	#REF!	#REF!	#REF!	0	0	6.71002	4.60803	0	1.56172	0	0	1.98254	0	0	0	0
InputMouse#1799	0	0.741538	11.1832	0	0	0	1.13748	4.03022	0	0	0.869586	0.453962	0.174343	2.14129	1.2722	0	0	1.49533	17.0137	1.1984	0	0.901637	1.94157	0	0	0	#REF!	#REF!	#REF!	#REF!	#REF!	#REF!	#REF!	#REF!	#REF!	#REF!	0	0	1.66803	0	0	2.91168	3.14128	0	1.97134	0	0	3.63466	1.32163
CEP
Region	ACA	AI	ECT	FRP	GU	ILA2/3	MO	ORB	PL	PTLp	RSP	SS	VIS	VISC	CP	LS	sAMY	STRv	GP	PALc	PALm	PALv	LZ/ME	MEZ	PVR	PVZ	AOB-dark/ Nlot	AOB-light	AON	COA	MOB-dark	MOB-light	PAA	PIR	TR	TT	BLA	BMA	CLA	EP	PA	DOR-pm	DOR-sm	LA	MB-mot	MB-sen	MB-sta	ENT	CA123_pyramidal/DG_granule
InputMouse#1791	0.196091	1.2158	0.674099	4.33319	0.447409	0	2.94372	3.54683	0	2.88139	1.23704	3.71929	3.3881	1.39398	2.45394	0.291155	0.135542	0.366551	0.662662	0.0577897	0.0245577	0.608706	0.327695	0.176763	0	0	#REF!	#REF!	#REF!	#REF!	#REF!	#REF!	#REF!	#REF!	#REF!	#REF!	0.3401	0	2.69461	0.626037	0.0749596	0.402503	0.369232	0	0.390813	0.628183	0.103759	0.550854	0.143397
InputMouse#1796	5.41865	1.30836	0.448442	0.823613	2.67874	0	2.40986	0.592572	0.294065	7.92292	6.74155	2.79609	2.4329	1.7173	0.95908	0.699436	0.394488	1.35915	0.944644	4.325	0.816847	4.0494	1.65056	0.39197	2.14385	0.439886	#REF!	#REF!	#REF!	#REF!	#REF!	#REF!	#REF!	#REF!	#REF!	#REF!	0.102841	0.262492	0.535099	1.28616	0	0.26465	0.28342	4.83519	0.202017	0.451139	0	1.91555	0.264984
InputMouse#	#DIV/0!	#DIV/0!	#DIV/0!	#DIV/0!	#DIV/0!	#DIV/0!	#DIV/0!	#DIV/0!	#DIV/0!	#DIV/0!	#DIV/0!	#DIV/0!	#DIV/0!	#DIV/0!	#DIV/0!	#DIV/0!	#DIV/0!	#DIV/0!	#DIV/0!	#DIV/0!	#DIV/0!	#DIV/0!	#DIV/0!	#DIV/0!	#DIV/0!	#DIV/0!	#REF!	#REF!	#REF!	#REF!	#REF!	#REF!	#REF!	#REF!	#REF!	#REF!	#DIV/0!	#DIV/0!	#DIV/0!	#DIV/0!	#DIV/0!	#DIV/0!	#DIV/0!	#DIV/0!	#DIV/0!	#DIV/0!	#DIV/0!	#DIV/0!	#DIV/0!
InputMouse#	#DIV/0!	#DIV/0!	#DIV/0!	#DIV/0!	#DIV/0!	#DIV/0!	#DIV/0!	#DIV/0!	#DIV/0!	#DIV/0!	#DIV/0!	#DIV/0!	#DIV/0!	#DIV/0!	#DIV/0!	#DIV/0!	#DIV/0!	#DIV/0!	#DIV/0!	#DIV/0!	#DIV/0!	#DIV/0!	#DIV/0!	#DIV/0!	#DIV/0!	#DIV/0!	#REF!	#REF!	#REF!	#REF!	#REF!	#REF!	#REF!	#REF!	#REF!	#REF!	#DIV/0!	#DIV/0!	#DIV/0!	#DIV/0!	#DIV/0!	#DIV/0!	#DIV/0!	#DIV/0!	#DIV/0!	#DIV/0!	#DIV/0!	#DIV/0!	#DIV/0!
InputMouse#	#DIV/0!	#DIV/0!	#DIV/0!	#DIV/0!	#DIV/0!	#DIV/0!	#DIV/0!	#DIV/0!	#DIV/0!	#DIV/0!	#DIV/0!	#DIV/0!	#DIV/0!	#DIV/0!	#DIV/0!	#DIV/0!	#DIV/0!	#DIV/0!	#DIV/0!	#DIV/0!	#DIV/0!	#DIV/0!	#DIV/0!	#DIV/0!	#DIV/0!	#DIV/0!	#REF!	#REF!	#REF!	#REF!	#REF!	#REF!	#REF!	#REF!	#REF!	#REF!	#DIV/0!	#DIV/0!	#DIV/0!	#DIV/0!	#DIV/0!	#DIV/0!	#DIV/0!	#DIV/0!	#DIV/0!	#DIV/0!	#DIV/0!	#DIV/0!	#DIV/0!
InputMouse#	#DIV/0!	#DIV/0!	#DIV/0!	#DIV/0!	#DIV/0!	#DIV/0!	#DIV/0!	#DIV/0!	#DIV/0!	#DIV/0!	#DIV/0!	#DIV/0!	#DIV/0!	#DIV/0!	#DIV/0!	#DIV/0!	#DIV/0!	#DIV/0!	#DIV/0!	#DIV/0!	#DIV/0!	#DIV/0!	#DIV/0!	#DIV/0!	#DIV/0!	#DIV/0!	#REF!	#REF!	#REF!	#REF!	#REF!	#REF!	#REF!	#REF!	#REF!	#REF!	#DIV/0!	#DIV/0!	#DIV/0!	#DIV/0!	#DIV/0!	#DIV/0!	#DIV/0!	#DIV/0!	#DIV/0!	#DIV/0!	#DIV/0!	#DIV/0!	#DIV/0!
InputMouse#	#DIV/0!	#DIV/0!	#DIV/0!	#DIV/0!	#DIV/0!	#DIV/0!	#DIV/0!	#DIV/0!	#DIV/0!	#DIV/0!	#DIV/0!	#DIV/0!	#DIV/0!	#DIV/0!	#DIV/0!	#DIV/0!	#DIV/0!	#DIV/0!	#DIV/0!	#DIV/0!	#DIV/0!	#DIV/0!	#DIV/0!	#DIV/0!	#DIV/0!	#DIV/0!	#REF!	#REF!	#REF!	#REF!	#REF!	#REF!	#REF!	#REF!	#REF!	#REF!	#DIV/0!	#DIV/0!	#DIV/0!	#DIV/0!	#DIV/0!	#DIV/0!	#DIV/0!	#DIV/0!	#DIV/0!	#DIV/0!	#DIV/0!	#DIV/0!	#DIV/0!
InputMouse#	#DIV/0!	#DIV/0!	#DIV/0!	#DIV/0!	#DIV/0!	#DIV/0!	#DIV/0!	#DIV/0!	#DIV/0!	#DIV/0!	#DIV/0!	#DIV/0!	#DIV/0!	#DIV/0!	#DIV/0!	#DIV/0!	#DIV/0!	#DIV/0!	#DIV/0!	#DIV/0!	#DIV/0!	#DIV/0!	#DIV/0!	#DIV/0!	#DIV/0!	#DIV/0!	#REF!	#REF!	#REF!	#REF!	#REF!	#REF!	#REF!	#REF!	#REF!	#REF!	#DIV/0!	#DIV/0!	#DIV/0!	#DIV/0!	#DIV/0!	#DIV/0!	#DIV/0!	#DIV/0!	#DIV/0!	#DIV/0!	#DIV/0!	#DIV/0!	#DIV/0!
InputMouse#	#DIV/0!	#DIV/0!	#DIV/0!	#DIV/0!	#DIV/0!	#DIV/0!	#DIV/0!	#DIV/0!	#DIV/0!	#DIV/0!	#DIV/0!	#DIV/0!	#DIV/0!	#DIV/0!	#DIV/0!	#DIV/0!	#DIV/0!	#DIV/0!	#DIV/0!	#DIV/0!	#DIV/0!	#DIV/0!	#DIV/0!	#DIV/0!	#DIV/0!	#DIV/0!	#REF!	#REF!	#REF!	#REF!	#REF!	#REF!	#REF!	#REF!	#REF!	#REF!	#DIV/0!	#DIV/0!	#DIV/0!	#DIV/0!	#DIV/0!	#DIV/0!	#DIV/0!	#DIV/0!	#DIV/0!	#DIV/0!	#DIV/0!	#DIV/0!	#DIV/0!
InputMouse#	#DIV/0!	#DIV/0!	#DIV/0!	#DIV/0!	#DIV/0!	#DIV/0!	#DIV/0!	#DIV/0!	#DIV/0!	#DIV/0!	#DIV/0!	#DIV/0!	#DIV/0!	#DIV/0!	#DIV/0!	#DIV/0!	#DIV/0!	#DIV/0!	#DIV/0!	#DIV/0!	#DIV/0!	#DIV/0!	#DIV/0!	#DIV/0!	#DIV/0!	#DIV/0!	#REF!	#REF!	#REF!	#REF!	#REF!	#REF!	#REF!	#REF!	#REF!	#REF!	#DIV/0!	#DIV/0!	#DIV/0!	#DIV/0!	#DIV/0!	#DIV/0!	#DIV/0!	#DIV/0!	#DIV/0!	#DIV/0!	#DIV/0!	#DIV/0!	#DIV/0!
Saline
Region	ACA	AI	ECT	FRP	GU	ILA2/3	MO	ORB	PL	PTLp	RSP	SS	VIS	VISC	CP	LS	sAMY	STRv	GP	PALc	PALm	PALv	LZ/ME	MEZ	PVR	PVZ	AOB-dark/ Nlot	AOB-light	AON	COA	MOB-dark	MOB-light	PAA	PIR	TR	TT	BLA	BMA	CLA	EP	PA	DOR-pm	DOR-sm	LA	MB-mot	MB-sen	MB-sta	ENT	CA123_pyramidal/DG_granule
InputMouse#1824	0	0	0	0	0	0	0	29.7229	0	0	0	0	0	0	0	0	0	0	0	0	0	0	0	0	0	0	0	0	0	0	0	0	0	0	0	0	0	0	0	0	0	0	0	0	0	0	0	0	0
InputMouse#1793	0	3.6459	0	0	0	0	0	0	0	0	0	0	0	0	0	6.59682	6.90981	0	0	0	0	13.2991	0	0	0	0	0	0	0	0	0	0	0	1.59916	0	0	0	0	0	0	15.2855	0	0	0	0	2.9113	0	2.55291	3.249
InputMouse#	#DIV/0!	#DIV/0!	#DIV/0!	#DIV/0!	#DIV/0!	#DIV/0!	#DIV/0!	#DIV/0!	#DIV/0!	#DIV/0!	#DIV/0!	#DIV/0!	#DIV/0!	#DIV/0!	#DIV/0!	#DIV/0!	#DIV/0!	#DIV/0!	#DIV/0!	#DIV/0!	#DIV/0!	#DIV/0!	#DIV/0!	#DIV/0!	#DIV/0!	#DIV/0!	#DIV/0!	#DIV/0!	#DIV/0!	#DIV/0!	#DIV/0!	#DIV/0!	#DIV/0!	#DIV/0!	#DIV/0!	#DIV/0!	#DIV/0!	#DIV/0!	#DIV/0!	#DIV/0!	#DIV/0!	#DIV/0!	#DIV/0!	#DIV/0!	#DIV/0!	#DIV/0!	#DIV/0!	#DIV/0!	#DIV/0!
InputMouse#	#DIV/0!	#DIV/0!	#DIV/0!	#DIV/0!	#DIV/0!	#DIV/0!	#DIV/0!	#DIV/0!	#DIV/0!	#DIV/0!	#DIV/0!	#DIV/0!	#DIV/0!	#DIV/0!	#DIV/0!	#DIV/0!	#DIV/0!	#DIV/0!	#DIV/0!	#DIV/0!	#DIV/0!	#DIV/0!	#DIV/0!	#DIV/0!	#DIV/0!	#DIV/0!	#DIV/0!	#DIV/0!	#DIV/0!	#DIV/0!	#DIV/0!	#DIV/0!	#DIV/0!	#DIV/0!	#DIV/0!	#DIV/0!	#DIV/0!	#DIV/0!	#DIV/0!	#DIV/0!	#DIV/0!	#DIV/0!	#DIV/0!	#DIV/0!	#DIV/0!	#DIV/0!	#DIV/0!	#DIV/0!	#DIV/0!
InputMouse#	#DIV/0!	#DIV/0!	#DIV/0!	#DIV/0!	#DIV/0!	#DIV/0!	#DIV/0!	#DIV/0!	#DIV/0!	#DIV/0!	#DIV/0!	#DIV/0!	#DIV/0!	#DIV/0!	#DIV/0!	#DIV/0!	#DIV/0!	#DIV/0!	#DIV/0!	#DIV/0!	#DIV/0!	#DIV/0!	#DIV/0!	#DIV/0!	#DIV/0!	#DIV/0!	#DIV/0!	#DIV/0!	#DIV/0!	#DIV/0!	#DIV/0!	#DIV/0!	#DIV/0!	#DIV/0!	#DIV/0!	#DIV/0!	#DIV/0!	#DIV/0!	#DIV/0!	#DIV/0!	#DIV/0!	#DIV/0!	#DIV/0!	#DIV/0!	#DIV/0!	#DIV/0!	#DIV/0!	#DIV/0!	#DIV/0!
InputMouse#	#DIV/0!	#DIV/0!	#DIV/0!	#DIV/0!	#DIV/0!	#DIV/0!	#DIV/0!	#DIV/0!	#DIV/0!	#DIV/0!	#DIV/0!	#DIV/0!	#DIV/0!	#DIV/0!	#DIV/0!	#DIV/0!	#DIV/0!	#DIV/0!	#DIV/0!	#DIV/0!	#DIV/0!	#DIV/0!	#DIV/0!	#DIV/0!	#DIV/0!	#DIV/0!	#DIV/0!	#DIV/0!	#DIV/0!	#DIV/0!	#DIV/0!	#DIV/0!	#DIV/0!	#DIV/0!	#DIV/0!	#DIV/0!	#DIV/0!	#DIV/0!	#DIV/0!	#DIV/0!	#DIV/0!	#DIV/0!	#DIV/0!	#DIV/0!	#DIV/0!	#DIV/0!	#DIV/0!	#DIV/0!	#DIV/0!
InputMouse#	#DIV/0!	#DIV/0!	#DIV/0!	#DIV/0!	#DIV/0!	#DIV/0!	#DIV/0!	#DIV/0!	#DIV/0!	#DIV/0!	#DIV/0!	#DIV/0!	#DIV/0!	#DIV/0!	#DIV/0!	#DIV/0!	#DIV/0!	#DIV/0!	#DIV/0!	#DIV/0!	#DIV/0!	#DIV/0!	#DIV/0!	#DIV/0!	#DIV/0!	#DIV/0!	#DIV/0!	#DIV/0!	#DIV/0!	#DIV/0!	#DIV/0!	#DIV/0!	#DIV/0!	#DIV/0!	#DIV/0!	#DIV/0!	#DIV/0!	#DIV/0!	#DIV/0!	#DIV/0!	#DIV/0!	#DIV/0!	#DIV/0!	#DIV/0!	#DIV/0!	#DIV/0!	#DIV/0!	#DIV/0!	#DIV/0!
InputMouse#	#DIV/0!	#DIV/0!	#DIV/0!	#DIV/0!	#DIV/0!	#DIV/0!	#DIV/0!	#DIV/0!	#DIV/0!	#DIV/0!	#DIV/0!	#DIV/0!	#DIV/0!	#DIV/0!	#DIV/0!	#DIV/0!	#DIV/0!	#DIV/0!	#DIV/0!	#DIV/0!	#DIV/0!	#DIV/0!	#DIV/0!	#DIV/0!	#DIV/0!	#DIV/0!	#DIV/0!	#DIV/0!	#DIV/0!	#DIV/0!	#DIV/0!	#DIV/0!	#DIV/0!	#DIV/0!	#DIV/0!	#DIV/0!	#DIV/0!	#DIV/0!	#DIV/0!	#DIV/0!	#DIV/0!	#DIV/0!	#DIV/0!	#DIV/0!	#DIV/0!	#DIV/0!	#DIV/0!	#DIV/0!	#DIV/0!
InputMouse#	#DIV/0!	#DIV/0!	#DIV/0!	#DIV/0!	#DIV/0!	#DIV/0!	#DIV/0!	#DIV/0!	#DIV/0!	#DIV/0!	#DIV/0!	#DIV/0!	#DIV/0!	#DIV/0!	#DIV/0!	#DIV/0!	#DIV/0!	#DIV/0!	#DIV/0!	#DIV/0!	#DIV/0!	#DIV/0!	#DIV/0!	#DIV/0!	#DIV/0!	#DIV/0!	#DIV/0!	#DIV/0!	#DIV/0!	#DIV/0!	#DIV/0!	#DIV/0!	#DIV/0!	#DIV/0!	#DIV/0!	#DIV/0!	#DIV/0!	#DIV/0!	#DIV/0!	#DIV/0!	#DIV/0!	#DIV/0!	#DIV/0!	#DIV/0!	#DIV/0!	#DIV/0!	#DIV/0!	#DIV/0!	#DIV/0!
InputMouse#	#DIV/0!	#DIV/0!	#DIV/0!	#DIV/0!	#DIV/0!	#DIV/0!	#DIV/0!	#DIV/0!	#DIV/0!	#DIV/0!	#DIV/0!	#DIV/0!	#DIV/0!	#DIV/0!	#DIV/0!	#DIV/0!	#DIV/0!	#DIV/0!	#DIV/0!	#DIV/0!	#DIV/0!	#DIV/0!	#DIV/0!	#DIV/0!	#DIV/0!	#DIV/0!	#DIV/0!	#DIV/0!	#DIV/0!	#DIV/0!	#DIV/0!	#DIV/0!	#DIV/0!	#DIV/0!	#DIV/0!	#DIV/0!	#DIV/0!	#DIV/0!	#DIV/0!	#DIV/0!	#DIV/0!	#DIV/0!	#DIV/0!	#DIV/0!	#DIV/0!	#DIV/0!	#DIV/0!	#DIV/0!	#DIV/0!
[truncated: 24 more columns]

## Sheet: Major Regions Transpose
PcA Total															Total
Mouse	Isocortex	Striatum	Pallidum	Hypothalamus	Cortical Subplate	Thalamus	Midbrain	Hippocampal Formation	Cerebellum	Pons	Medulla	Tracts
InputMouse#1760	18	4	0	1	0	0	0	5	0	0	0	4			32
InputMouse#1761	11	9	9	2	0	2	1	6	4	2	3	6			55
InputMouse#1779	41	23	2	1	1	1	2	4	11	1	0	15			102
InputMouse#1780	115	99	10	12	22	39	27	21	16	5	1	34			401
InputMouse#1789	81	17	8	2	3	1	7	5	6	2	0	7			139
InputMouse#1790	8	92	1	0	3	2	0	11	5	6	9	14			151
InputMouse#1794	132	87	3	2	19	4	10	24	1	2	5	21			310
InputMouse#1816	330	244	57	209	20	122	61	96	82	72	48	186			1527
InputMouse#1798	42	7	4	2	5	4	9	5	2	0	1	7			88
InputMouse#1799	37	16	15	5	1	23	18	20	7	8	4	23			177
PcA Normalize
Mouse	Isocortex	Striatum	Pallidum	Hypothalamus	Cortical Subplate	Thalamus	Midbrain	Hippocampal Formation	Cerebellum	Pons	Medulla	Tracts
InputMouse#1760	2.17777	1.2829	0	0.896913	0	0	0	1.96569	0	0	0	0.799424
InputMouse#1761	0.774319	1.67943	6.73083	1.04368	0	0.716832	0.202827	1.37241	0.925366	0.923671	0.789535	0.697679
InputMouse#1779	1.55623	2.31425	0.806526	0.281385	0.448677	0.193263	0.218735	0.493349	1.37217	0.249029	0	0.940499
InputMouse#1780	1.11031	2.5338	1.02576	0.858889	2.5108	1.91721	0.751116	0.658824	0.507682	0.31672	0.0360968	0.542253
InputMouse#1789	2.25611	1.25521	2.36736	0.412967	0.987736	0.141819	0.561786	0.452532	0.549228	0.365481	0	0.32207
InputMouse#1790	0.205118	6.25307	0.272403	0	0.90924	0.261098	0	0.916453	0.421317	1.00931	0.862737	0.59295
InputMouse#1794	1.64855	2.88031	0.39806	0.185169	2.80496	0.25436	0.359854	0.973966	0.0410445	0.163877	0.233465	0.433236
InputMouse#1816	0.83669	1.63996	1.53541	3.92833	0.599412	1.57496	0.445634	0.790909	0.683268	1.19769	0.455004	0.779006
InputMouse#1798	1.84781	0.81639	1.86967	0.652301	2.60029	0.89604	1.1409	0.714795	0.289177	0	0.164486	0.508724
InputMouse#1799	0.809316	0.927746	3.48583	0.810769	0.25856	2.56156	1.13445	1.42151	0.503201	1.14807	0.327114	0.831039
CEP Total
Mouse	Isocortex	Striatum	Pallidum	Hypothalamus	Cortical Subplate	Thalamus	Midbrain	Hippocampal Formation	Cerebellum	Pons	Medulla	Tracts
InputMouse#1791	4636	887	52	47	113	125	240	162	1288	108	232	524			8414
InputMouse#1796	1403	182	120	82	27	26	52	116	31	14	22	132			2207
InputMouse#	0	0	0	0	0	0	0	0	0	0	0	0			0
InputMouse#	0	0	0	0	0	0	0	0	0	0	0	0			0
InputMouse#	0	0	0	0	0	0	0	0	0	0	0	0			0
InputMouse#	0	0	0	0	0	0	0	0	0	0	0	0			0
InputMouse#	0	0	0	0	0	0	0	0	0	0	0	0			0
InputMouse#	0	0	0	0	0	0	0	0	0	0	0	0			0
InputMouse#	0	0	0	0	0	0	0	0	0	0	0	0			0
InputMouse#	0	0	0	0	0	0	0	0	0	0	0	0			0
CEP Normalize
Mouse	Isocortex	Striatum	Pallidum	Hypothalamus	Cortical Subplate	Thalamus	Midbrain	Hippocampal Formation	Cerebellum	Pons	Medulla	Tracts
InputMouse#1791	2.445	1.24008	0.291365	0.183757	0.704462	0.335664	0.364707	0.277622	0.372649	0.373696	0.457452	0.456502
InputMouse#1796	2.46119	0.846352	2.23649	1.06638	0.559881	0.232231	0.262838	0.661226	0.178721	0.16113	0.144289	0.382506
InputMouse#	#DIV/0!	#DIV/0!	#DIV/0!	#DIV/0!	#DIV/0!	#DIV/0!	#DIV/0!	#DIV/0!	#DIV/0!	#DIV/0!	#DIV/0!	#DIV/0!
InputMouse#	#DIV/0!	#DIV/0!	#DIV/0!	#DIV/0!	#DIV/0!	#DIV/0!	#DIV/0!	#DIV/0!	#DIV/0!	#DIV/0!	#DIV/0!	#DIV/0!
InputMouse#	#DIV/0!	#DIV/0!	#DIV/0!	#DIV/0!	#DIV/0!	#DIV/0!	#DIV/0!	#DIV/0!	#DIV/0!	#DIV/0!	#DIV/0!	#DIV/0!
InputMouse#	#DIV/0!	#DIV/0!	#DIV/0!	#DIV/0!	#DIV/0!	#DIV/0!	#DIV/0!	#DIV/0!	#DIV/0!	#DIV/0!	#DIV/0!	#DIV/0!
InputMouse#	#DIV/0!	#DIV/0!	#DIV/0!	#DIV/0!	#DIV/0!	#DIV/0!	#DIV/0!	#DIV/0!	#DIV/0!	#DIV/0!	#DIV/0!	#DIV/0!
InputMouse#	#DIV/0!	#DIV/0!	#DIV/0!	#DIV/0!	#DIV/0!	#DIV/0!	#DIV/0!	#DIV/0!	#DIV/0!	#DIV/0!	#DIV/0!	#DIV/0!
InputMouse#	#DIV/0!	#DIV/0!	#DIV/0!	#DIV/0!	#DIV/0!	#DIV/0!	#DIV/0!	#DIV/0!	#DIV/0!	#DIV/0!	#DIV/0!	#DIV/0!
InputMouse#	#DIV/0!	#DIV/0!	#DIV/0!	#DIV/0!	#DIV/0!	#DIV/0!	#DIV/0!	#DIV/0!	#DIV/0!	#DIV/0!	#DIV/0!	#DIV/0!
Saline Total
Mouse	Isocortex	Striatum	Pallidum	Hypothalamus	Cortical Subplate	Thalamus	Midbrain	Hippocampal Formation	Cerebellum	Pons	Medulla	Tracts
InputMouse#1824	2	0	0	0	0	0	0	0	0	0	0	2
InputMouse#1793	1	4	3	0	1	0	2	16	8	0	0	0
InputMouse#	0	0	0	0	0	0	0	0	0	0	0	0
InputMouse#	0	0	0	0	0	0	0	0	0	0	0	0
InputMouse#	0	0	0	0	0	0	0	0	0	0	0	0
InputMouse#	0	0	0	0	0	0	0	0	0	0	0	0
InputMouse#	0	0	0	0	0	0	0	0	0	0	0	0
InputMouse#	0	0	0	0	0	0	0	0	0	0	0	0
InputMouse#	0	0	0	0	0	0	0	0	0	0	0	0
InputMouse#	0	0	0	0	0	0	0	0	0	0	0	0
Saline Normalize
Mouse	Isocortex	Striatum	Pallidum	Hypothalamus	Cortical Subplate	Thalamus	Midbrain	Hippocampal Formation	Cerebellum	Pons	Medulla	Tracts
InputMouse#1824	2.25778	0	0	0	0	0	0	0	0	0	0	3.72959
InputMouse#1793	0.125432	1.33003	3.99795	0	1.48267	0	0.722834	6.52127	2.00527	0	0	0
InputMouse#	#DIV/0!	#DIV/0!	#DIV/0!	#DIV/0!	#DIV/0!	#DIV/0!	#DIV/0!	#DIV/0!	#DIV/0!	#DIV/0!	#DIV/0!	#DIV/0!
InputMouse#	#DIV/0!	#DIV/0!	#DIV/0!	#DIV/0!	#DIV/0!	#DIV/0!	#DIV/0!	#DIV/0!	#DIV/0!	#DIV/0!	#DIV/0!	#DIV/0!
InputMouse#	#DIV/0!	#DIV/0!	#DIV/0!	#DIV/0!	#DIV/0!	#DIV/0!	#DIV/0!	#DIV/0!	#DIV/0!	#DIV/0!	#DIV/0!	#DIV/0!
InputMouse#	#DIV/0!	#DIV/0!	#DIV/0!	#DIV/0!	#DIV/0!	#DIV/0!	#DIV/0!	#DIV/0!	#DIV/0!	#DIV/0!	#DIV/0!	#DIV/0!
InputMouse#	#DIV/0!	#DIV/0!	#DIV/0!	#DIV/0!	#DIV/0!	#DIV/0!	#DIV/0!	#DIV/0!	#DIV/0!	#DIV/0!	#DIV/0!	#DIV/0!
InputMouse#	#DIV/0!	#DIV/0!	#DIV/0!	#DIV/0!	#DIV/0!	#DIV/0!	#DIV/0!	#DIV/0!	#DIV/0!	#DIV/0!	#DIV/0!	#DIV/0!
InputMouse#	#DIV/0!	#DIV/0!	#DIV/0!	#DIV/0!	#DIV/0!	#DIV/0!	#DIV/0!	#DIV/0!	#DIV/0!	#DIV/0!	#DIV/0!	#DIV/0!
InputMouse#	#DIV/0!	#DIV/0!	#DIV/0!	#DIV/0!	#DIV/0!	#DIV/0!	#DIV/0!	#DIV/0!	#DIV/0!	#DIV/0!	#DIV/0!	#DIV/0!

## Sheet: ROI Areas
region	1	2	3	4	5	6	7	8	9	10	11	12	13	14	15	16	17	18	19	20	21	Area	% area of whole brain
ACA	0	0	0	0	0	0	0	0	0	0	0	0	0	0	0	0	607086	1268309	1585408	4621314	1553148	9635265	0.00903089
AI	772794	663381	595141	625243	1309747	1079035	1138887	1029161	915407	0	0	0	0	0	0	0	0	0	0	0	0	8128796	0.00761891
ECT	437615	123701	170710	93353	133596	119039	0	0	0	0	0	0	0	0	0	0	0	0	0	0	0	1078014	0.0010104
FRP	0	0	0	0	0	0	0	0	0	0	174518	123783	195141	205030	170384	157592	147470	0	0	0	0	1173918	0.00110028
GU	351304	281127	583078	408706	0	0	0	0	0	0	0	0	0	0	0	0	0	0	0	0	0	1624215	0.00152234
ILA2/3	0	0	0	0	0	0	0	0	0	0	0	0	0	0	0	0	0	0	1449710	0	0	1449710	0.00135878
MO	0	0	0	0	1702685	2150897	3411239	2828487	2826312	2523898	4062677	3739128	3633207	3963759	5044088	6327435	6877579	5645775	3821264	0	5032851	63591281	0.0596025
ORB	0	0	0	0	0	0	0	443491	733783	1660592	1700403	2094059	1665095	1224965	1214408	1412967	1896077	1554142	317514	925063	1105277	17947836	0.0168221
PL	0	0	0	0	0	0	0	0	0	0	0	0	0	0	0	0	0	986142	688732	1296823	316189	3287886	0.00308165
PTLp	0	0	0	0	0	733924	382064	236457	373750	353663	245130	266931	324482	406626	459980	0	0	0	0	0	0	3783007	0.00354572
RSP	0	0	0	0	0	0	139377	187393	215888	182761	171461	502100	524462	452408	434098	3339547	2900308	2730605	3110512	3041880	2862669	20795469	0.0194911
SS	7028454	7478400	7833130	6840313	6109786	5526247	3838522	4023561	3778753	4129794	2577401	2172317	2269434	2056699	728420	0	0	0	0	0	0	66391231	0.0622268
VIS	2008300	2193180	2310207	2347423	2646658	1936474	2564721	2311838	2463005	2474048	2159495	2319728	2276212	2159461	2403775	0	0	0	0	0	0	34574525	0.0324058
VISC	625292	496721	675723	1017304	0	0	0	0	0	0	0	0	0	0	0	0	0	0	0	0	0	2815040	0.00263847
CP	207598	1410080	2353556	3247716	3771131	3926625	4206074	4131148	3740528	3433262	3940452	3478332	3227643	3240821	2122405	943573	0	3	0	0	0	47380947	0.044409
LS	0	0	0	0	0	0	0	0	0	0	0	0	0	0	0	912604	1823704	1936620	2101223	666119	1544896	8985166	0.00842157
sAMY	0	0	0	351436	602795	1067214	1425385	1197149	1465501	1404897	1063794	0	0	0	0	0	0	0	0	0	0	8578171	0.0080401
STRv	0	121959	271694	420444	393403	354439	225731	860306	1857105	2225362	1804793	2538925	2816488	2412852	2368162	1775567	1737857	1122832	462535	0	416029	24186483	0.0226694
GP	0	0	0	0	205951	412947	823517	728650	710503	627535	633530	318802	144366	0	0	0	0	0	0	0	0	4605801	0.0043169
PALc	0	0	0	0	0	0	0	0	0	0	0	0	0	369773	1062031	1359608	898198	609733	432253	3	298280	5029879	0.00471438
PALm	0	0	0	0	0	0	0	0	0	0	0	0	90178	252076	256393	276204	371932	604495	996254	1889492	1181185	5918209	0.00554699
PALv	0	0	0	0	0	0	162853	751948	732786	811679	1130731	895401	621210	451843	309439	310256	457730	49524	5	8	0	6685413	0.00626607
LZ/ME	0	0	0	0	0	0	0	78187	369572	618585	717195	1563099	2394526	2753582	2977942	2868299	448396	498109	255	234986	291	15523024	0.0145493
MEZ	0	0	0	0	0	0	0	0	0	0	0	0	0	0	129789	455792	1985588	2156081	2060925	1167966	1910475	9866616	0.00924773
PVR	0	0	0	0	0	0	0	0	0	0	0	0	0	0	0	0	377764	1048638	1109455	796324	952227	4284408	0.00401567
PVZ	0	0	0	0	0	0	0	0	0	0	0	16478	20677	10880	0	0	158039	141265	694921	413721	741981	2197962	0.00206009
AOB-dark/ Nlot	0	0	0	0	0	0	0	244808	379451	329606	88110	0	131418	234123	214782	52226	0	0	0	0	0	1674524	0.00156949
AOB-light	0	0	0	0	0	0	0	0	0	0	0	0	246101	395043	362154	149355	0	0	0	0	0	1152653	0.00108035
AON	0	0	0	0	0	0	0	0	0	0	373776	417107	1000309	1685551	1814776	1651800	1026684	377273	163612	0	0	8510888	0.00797704
COA	366045	442079	946784	1307499	1432377	1409820	1519601	965542	517673	97530	0	0	0	0	0	0	0	0	0	0	0	9004950	0.00844011
MOB-dark	0	0	0	0	0	0	0	0	0	1082279	890785	2025677	2365091	2767330	4229201	5031714	3372353	3804486	1998575	452909	3547854	31568254	0.0295881
MOB-light	68134	67167	144668	77027	83552	94525	73435	51939	30137	1	1482859	1280821	3054267	2200554	1396599	1343427	4093679	2280786	3602978	2010102	2982837	26419494	0.0247623
PAA	630055	496214	282295	383496	0	0	0	0	0	0	0	0	0	0	0	0	0	0	0	0	0	1792060	0.00167965
PIR	1621931	2127757	2150898	2031051	2522399	1744653	1760915	784162	819508	1060051	517208	623580	565961	102591	99985	0	0	0	0	0	0	18532650	0.0173702
TR	315680	500421	161646	0	0	0	0	0	0	0	0	0	0	0	0	0	0	0	0	0	0	977747	0.000916418
TT	0	1	0	1	0	0	0	0	0	0	0	0	0	0	0	317364	728683	1112039	1186099	1057521	1781458	6183166	0.00579533
BLA	641838	876694	976988	1217850	686444	168773	132134	0	0	0	0	0	0	0	0	0	0	0	0	0	0	4700721	0.00440587
BMA	0	0	0	79173	446365	492062	368613	318371	137098	0	0	0	0	0	0	0	0	0	0	0	0	1841682	0.00172616
CLA	971445	312187	267389	205484	165532	175752	142277	146221	164710	121700	185682	255436	166801	203933	129189	0	0	0	0	0	0	3613738	0.00338707
EP	1704989	877289	759398	683368	712717	616107	211757	213860	296605	176738	247998	286321	286367	471247	348501	0	0	0	0	0	0	7893262	0.00739815
PA	0	69283	135212	220788	256419	311941	221420	206791	185383	119043	212598	0	0	0	0	0	0	0	0	0	0	1938878	0.00181726
DOR-pm	0	0	0	0	0	0	564472	1212138	522900	480829	1533717	2269025	2236455	2091928	2155487	2149087	2187839	2958952	3416169	3621261	3653001	31053260	0.0291054
DOR-sm	0	0	0	0	0	0	259700	965199	1848716	2308787	1724910	1268801	1283651	1360079	1357697	915234	818310	346263	231252	338420	324194	15351213	0.0143883
LA	251943	376072	371795	0	0	0	0	0	0	0	0	0	0	0	0	0	0	0	0	0	0	999810	0.000937097
MB-mot	0	0	0	0	0	0	0	0	250054	1338344	2852058	3491943	4301613	4851591	5572388	6840915	5817598	5327856	5061914	4567874	4764890	55039038	0.0515867
MB-sen	0	0	0	0	0	0	0	0	72211	1586034	1295920	2084477	2414805	2248286	2018892	1748137	1729673	1309876	1107115	1400829	1343574	20359829	0.0190828
MB-sta	0	0	0	0	0	0	0	0	0	84033	175746	427221	546745	502676	1	1	6	422333	1493857	1570200	380096	5602915	0.00525147
ENT	2371150	2177759	2302398	1879039	1781299	1097343	0	0	0	0	0	0	0	0	0	0	0	0	0	0	0	11608988	0.0108808
CA123_pyramidal/DG_granule	779023	471226	472917	730780	843898	973388	763783	689340	540699	427864	398432	312447	298302	300358	287394	276172	243756	175504	78405	0	58124	9121812	0.00854964
CA123 / DG	842105	1769956	2702294	2629416	3244803	3446159	3379021	2734075	2218187	1820374	1581021	1422223	1317029	1321202	1199689	1128971	837459	629904	618543	0	552115	35394546	0.0331744
PAR	0	0	0	0	0	452715	1075754	1	0	0	0	0	0	0	0	0	0	0	0	0	0	1528470	0.0014326
POST	0	0	0	0	0	0	174557	407448	522301	487312	418075	0	0	0	0	0	0	0	0	0	0	2009693	0.00188363
PRE	0	0	0	0	305836	309209	499941	899190	151661	0	0	0	0	0	0	0	0	0	0	0	0	2165837	0.00202998
SUB	662679	1025281	1102162	1801288	1448405	1090318	996407	580048	358041	324279	332809	309848	232181	199659	188001	98865	84728	49248	0	0	0	10884247	0.0102015
CBX-granular	1364576	1716464	2162494	2297351	2816766	2796349	2452293	2532060	2566265	2127303	2193316	2097796	2096242	2233060	2519246	2717856	2948750	3222863	3379268	3262620	3005335	52508273	0.0492147
CBX-molecular	1880993	2179983	2375023	3144757	3126796	2970070	2775958	2945340	3029724	2905084	2530473	2316860	2068787	2364221	2755301	3177859	3570351	3889909	3959854	3880878	3724227	61572448	0.0577103
DN	0	12	4	0	0	81861	320990	420643	384230	437038	509232	419423	447249	305563	467831	307793	52542	21	0	0	0	4154432	0.00389384
P-mot	0	0	0	0	0	0	0	0	0	0	719787	618336	1024524	1142918	1335175	2058612	2152062	1879900	1899138	2064385	2055098	16949935	0.0158867
P-sat	0	0	0	0	0	0	0	0	0	0	416803	524244	872838	1125621	1554310	1267930	1607534	1216142	698368	637195	844079	10765064	0.0100898
P-sen	0	0	0	0	0	0	0	207697	782493	1984643	952015	1362108	1058653	956841	597863	205169	190580	0	0	0	0	8298062	0.00777756
MY-mot	0	0	0	0	2	15	3	0	0	74215	2158868	3997814	4600244	5076795	4817589	5765550	5327479	4621471	2472296	2407463	3207521	44527325	0.0417343
MY-sat	0	0	0	0	0	4	2	0	0	0	1	2	8	2	1	14	2	1	668993	743397	486461	1898888	0.00177978
MY-sen	0	0	0	0	164864	664969	1111111	946157	1666597	2836956	2049029	2176166	1463195	1138508	779429	152942	289451	248216	320694	487499	275096	16770879	0.0157189
blue gray tracts	1071594	1266129	1257695	1480881	1930016	279155	302324	390779	982517	712019	937407	929882	3042318	750904	716261	659278	680240	903633	2990183	507036	2713219	24503470	0.0229665
light grey tracts	0	0	0	0	0	4269943	5579729	6550693	7725855	6520256	6827978	5915492	0	5281449	5531138	4568763	4474324	6874155	0	7985118	0	78104893	0.0732057
CBX-tracts	97788	148472	240140	415800	561965	28062	28122	860	70	16024	401	7790	685668	8877	9141	638	125	6467	573220	373	660805	3490808	0.00327185
CTX tracts	328424	376533	494751	368408	339588	319648	279433	124460	95327	74516	73013	61567	67752	80778	19412	916	2077	580	6770	1217	1001	3116171	0.00292071
HY-tracts	0	0	0	0	0	0	0	0	17	0	0	44778	233008	328959	339964	380312	1022946	616453	1138752	205298	1623202	5933689	0.0055615
MB-tracts	0	0	0	0	0	0	0	0	787015	230583	256522	584889	720653	571091	779512	587957	502269	826666	928858	144724	2483089	9403828	0.00881397
MY-tracts	0	0	82531	182756	234773	683	15309	5575	3265	59396	275648	398655	593320	426644	505370	306833	362757	455375	2742486	703285	2495068	9849729	0.0092319
P-tracts	0	0	0	0	0	0	0	7491	4491	48671	199327	217749	744656	242683	266257	89227	142325	319868	808580	328710	765086	4185121	0.00392261
TH-tracts	0	0	0	0	0	0	74815	173212	275530	288066	236999	248844	345246	352014	385936	353435	329084	256918	395249	252884	479203	4447435	0.00416847
ventricles	33819	59845	80906	232776	682515	704416	506580	291911	217962	227788	265748	291221	323692	450734	897070	1343931	460703	609266	1500845	4905747	876128	X	X
Total Area*	27401749	30045528	34182721	36488151	39980568	41100365	43402246	43531876	47501624	50605650	55030103	58426405	60714578	63283854	64435786	64443796	65283394	64485431	60772194	53684897	62122131	1066923047	1
