# Supplementary material for: Injection with Toxoplasma gondii protein affects neuron health and survival
Source: eLife. 2021 Jun 9;10:e67681. doi: 10.7554/eLife.67681 (PMC8270641; doi:10.7554/eLife.67681)
Supplement: Figure 1—source data 5. [file elife-67681-fig1-data5.xlsx]

## Sheet: PcA
Input#OfMice	TOTAL	Average per mouse	4150	_1	_2	_3	_4	_5	_6	_7	_8	_9	_10	_11	_12	_13	_14	_15	_16	_17	_18	_19	_20	_21	TOTAL	4151	_1	_2	_3	_4	_5	_6	_7	_8	_9	_10	_11	_12	_13	_14	_15	_16	_17	_18	_19	_20	_21	TOTAL	InputMouse#
ACA	0	#VALUE!	ACA	0	0	0	0	0	0	0	0	0	0	0	0	0	0	0	0	0	0	0	0	0	0	ACA	0	0	0	0	0	0	0	0	0	0	0	0	0	0	0	0	0	0	0	0	0	0	ACA
AI	11	#VALUE!	AI	0	0	0	3	3	5	0	0	0	0	0	0	0	0	0	0	0	0	0	0	0	11	AI	0	0	0	0	0	0	0	0	0	0	0	0	0	0	0	0	0	0	0	0	0	0	AI
ECT	0	#VALUE!	ECT	0	0	0	0	0	0	0	0	0	0	0	0	0	0	0	0	0	0	0	0	0	0	ECT	0	0	0	0	0	0	0	0	0	0	0	0	0	0	0	0	0	0	0	0	0	0	ECT
FRP	0	#VALUE!	FRP	0	0	0	0	0	0	0	0	0	0	0	0	0	0	0	0	0	0	0	0	0	0	FRP	0	0	0	0	0	0	0	0	0	0	0	0	0	0	0	0	0	0	0	0	0	0	FRP
GU	1	#VALUE!	GU	0	0	0	1	0	0	0	0	0	0	0	0	0	0	0	0	0	0	0	0	0	1	GU	0	0	0	0	0	0	0	0	0	0	0	0	0	0	0	0	0	0	0	0	0	0	GU
ILA2/3	0	#VALUE!	ILA2/3	0	0	0	0	0	0	0	0	0	0	0	0	0	0	0	0	0	0	0	0	0	0	ILA2/3	0	0	0	0	0	0	0	0	0	0	0	0	0	0	0	0	0	0	0	0	0	0	ILA2/3
MO	3	#VALUE!	MO	0	0	0	0	0	0	0	0	0	0	0	0	0	1	0	0	0	0	0	0	0	1	MO	0	0	0	0	0	0	0	0	0	0	1	0	0	0	0	1	0	0	0	0	0	2	MO
ORB	2	#VALUE!	ORB	0	0	0	0	0	0	0	0	0	0	0	0	0	0	0	0	0	0	0	0	0	0	ORB	0	0	0	0	0	0	0	0	0	0	0	0	0	0	2	0	0	0	0	0	0	2	ORB
PL	3	#VALUE!	PL	0	0	0	0	0	0	0	0	0	0	0	0	0	0	0	0	0	3	0	0	0	3	PL	0	0	0	0	0	0	0	0	0	0	0	0	0	0	0	0	0	0	0	0	0	0	PL
PTLp	5	#VALUE!	PTLp	0	0	0	0	0	0	1	2	0	2	0	0	0	0	0	0	0	0	0	0	0	5	PTLp	0	0	0	0	0	0	0	0	0	0	0	0	0	0	0	0	0	0	0	0	0	0	PTLp
RSP	1	#VALUE!	RSP	0	0	0	0	0	0	0	0	0	0	0	0	0	0	0	0	0	0	0	0	0	0	RSP	0	0	0	0	0	0	0	0	0	0	0	0	0	0	0	0	0	0	0	1	0	1	RSP
SS	15	#VALUE!	SS	1	1	2	2	0	3	0	1	0	0	1	0	2	0	0	0	0	0	0	0	0	13	SS	0	0	1	0	0	0	0	0	0	1	0	0	0	0	0	0	0	0	0	0	0	2	SS
VIS	9	#VALUE!	VIS	0	0	0	0	0	0	6	0	0	0	0	0	1	0	0	0	0	0	0	0	0	7	VIS	0	0	0	1	0	0	0	1	0	0	0	0	0	0	0	0	0	0	0	0	0	2	VIS
VISC	0	#VALUE!	VISC	0	0	0	0	0	0	0	0	0	0	0	0	0	0	0	0	0	0	0	0	0	0	VISC	0	0	0	0	0	0	0	0	0	0	0	0	0	0	0	0	0	0	0	0	0	0	VISC
CP	14	#VALUE!	CP	0	0	0	0	2	0	0	1	0	0	0	0	0	1	0	0	0	0	0	0	0	4	CP	0	0	0	0	0	0	1	1	0	1	1	1	4	1	0	0	0	0	0	0	0	10	CP
LS	0	#VALUE!	LS	0	0	0	0	0	0	0	0	0	0	0	0	0	0	0	0	0	0	0	0	0	0	LS	0	0	0	0	0	0	0	0	0	0	0	0	0	0	0	0	0	0	0	0	0	0	LS
sAMY	0	#VALUE!	sAMY	0	0	0	0	0	0	0	0	0	0	0	0	0	0	0	0	0	0	0	0	0	0	sAMY	0	0	0	0	0	0	0	0	0	0	0	0	0	0	0	0	0	0	0	0	0	0	sAMY
STRv	4	#VALUE!	STRv	0	0	0	0	0	0	0	0	0	0	0	0	0	0	0	0	0	0	0	0	0	0	STRv	0	0	0	0	0	0	0	0	0	0	0	0	0	1	0	1	0	2	0	0	0	4	STRv
GP	0	#VALUE!	GP	0	0	0	0	0	0	0	0	0	0	0	0	0	0	0	0	0	0	0	0	0	0	GP	0	0	0	0	0	0	0	0	0	0	0	0	0	0	0	0	0	0	0	0	0	0	GP
PALc	2	#VALUE!	PALc	0	0	0	0	0	0	0	0	0	0	0	0	0	0	0	0	0	0	0	0	0	0	PALc	0	0	0	0	0	0	0	0	0	0	0	0	0	0	1	1	0	0	0	0	0	2	PALc
PALm	0	#VALUE!	PALm	0	0	0	0	0	0	0	0	0	0	0	0	0	0	0	0	0	0	0	0	0	0	PALm	0	0	0	0	0	0	0	0	0	0	0	0	0	0	0	0	0	0	0	0	0	0	PALm
PALv	2	#VALUE!	PALv	0	0	0	0	0	0	0	0	0	0	0	0	0	0	0	0	0	0	0	0	0	0	PALv	0	0	0	0	0	0	0	0	0	0	0	0	0	0	0	2	0	0	0	0	0	2	PALv
LZ/ME	6	#VALUE!	LZ/ME	0	0	0	0	0	0	0	0	0	0	0	2	0	0	0	0	0	0	0	0	0	2	LZ/ME	0	0	0	0	0	0	0	0	0	0	0	0	0	3	0	1	0	0	0	0	0	4	LZ/ME
MEZ	1	#VALUE!	MEZ	0	0	0	0	0	0	0	0	0	0	0	0	0	0	0	0	0	0	1	0	0	1	MEZ	0	0	0	0	0	0	0	0	0	0	0	0	0	0	0	0	0	0	0	0	0	0	MEZ
PVR	0	#VALUE!	PVR	0	0	0	0	0	0	0	0	0	0	0	0	0	0	0	0	0	0	0	0	0	0	PVR	0	0	0	0	0	0	0	0	0	0	0	0	0	0	0	0	0	0	0	0	0	0	PVR
PVZ	0	#VALUE!	PVZ	0	0	0	0	0	0	0	0	0	0	0	0	0	0	0	0	0	0	0	0	0	0	PVZ	0	0	0	0	0	0	0	0	0	0	0	0	0	0	0	0	0	0	0	0	0	0	PVZ
AOB-dark/ Nlot	0	#VALUE!	AOB-dark/ Nlot	0	0	0	0	0	0	0	0	0	0	0	0	0	0	0	0	0	0	0	0	0	0	AOB-dark/ Nlot	0	0	0	0	0	0	0	0	0	0	0	0	0	0	0	0	0	0	0	0	0	0	AOB-dark/ Nlot
AOB-light	0	#VALUE!	AOB-light	0	0	0	0	0	0	0	0	0	0	0	0	0	0	0	0	0	0	0	0	0	0	AOB-light	0	0	0	0	0	0	0	0	0	0	0	0	0	0	0	0	0	0	0	0	0	0	AOB-light
AON	0	#VALUE!	AON	0	0	0	0	0	0	0	0	0	0	0	0	0	0	0	0	0	0	0	0	0	0	AON	0	0	0	0	0	0	0	0	0	0	0	0	0	0	0	0	0	0	0	0	0	0	AON
COA	0	#VALUE!	COA	0	0	0	0	0	0	0	0	0	0	0	0	0	0	0	0	0	0	0	0	0	0	COA	0	0	0	0	0	0	0	0	0	0	0	0	0	0	0	0	0	0	0	0	0	0	COA
MOB-dark	11	#VALUE!	MOB-dark	0	0	0	0	0	0	0	0	0	0	0	0	0	0	0	9	1	1	0	0	0	11	MOB-dark	0	0	0	0	0	0	0	0	0	0	0	0	0	0	0	0	0	0	0	0	0	0	MOB-dark
MOB-light	3	#VALUE!	MOB-light	0	0	0	0	0	0	0	0	0	0	0	0	0	0	0	0	3	0	0	0	0	3	MOB-light	0	0	0	0	0	0	0	0	0	0	0	0	0	0	0	0	0	0	0	0	0	0	MOB-light
PAA	0	#VALUE!	PAA	0	0	0	0	0	0	0	0	0	0	0	0	0	0	0	0	0	0	0	0	0	0	PAA	0	0	0	0	0	0	0	0	0	0	0	0	0	0	0	0	0	0	0	0	0	0	PAA
PIR	0	#VALUE!	PIR	0	0	0	0	0	0	0	0	0	0	0	0	0	0	0	0	0	0	0	0	0	0	PIR	0	0	0	0	0	0	0	0	0	0	0	0	0	0	0	0	0	0	0	0	0	0	PIR
TR	0	#VALUE!	TR	0	0	0	0	0	0	0	0	0	0	0	0	0	0	0	0	0	0	0	0	0	0	TR	0	0	0	0	0	0	0	0	0	0	0	0	0	0	0	0	0	0	0	0	0	0	TR
TT	1	#VALUE!	TT	0	0	0	0	0	0	0	0	0	0	0	0	0	0	0	0	0	1	0	0	0	1	TT	0	0	0	0	0	0	0	0	0	0	0	0	0	0	0	0	0	0	0	0	0	0	TT
BLA	0	#VALUE!	BLA	0	0	0	0	0	0	0	0	0	0	0	0	0	0	0	0	0	0	0	0	0	0	BLA	0	0	0	0	0	0	0	0	0	0	0	0	0	0	0	0	0	0	0	0	0	0	BLA
BMA	0	#VALUE!	BMA	0	0	0	0	0	0	0	0	0	0	0	0	0	0	0	0	0	0	0	0	0	0	BMA	0	0	0	0	0	0	0	0	0	0	0	0	0	0	0	0	0	0	0	0	0	0	BMA
CLA	1	#VALUE!	CLA	0	0	1	0	0	0	0	0	0	0	0	0	0	0	0	0	0	0	0	0	0	1	CLA	0	0	0	0	0	0	0	0	0	0	0	0	0	0	0	0	0	0	0	0	0	0	CLA
EP	0	#VALUE!	EP	0	0	0	0	0	0	0	0	0	0	0	0	0	0	0	0	0	0	0	0	0	0	EP	0	0	0	0	0	0	0	0	0	0	0	0	0	0	0	0	0	0	0	0	0	0	EP
PA	0	#VALUE!	PA	0	0	0	0	0	0	0	0	0	0	0	0	0	0	0	0	0	0	0	0	0	0	PA	0	0	0	0	0	0	0	0	0	0	0	0	0	0	0	0	0	0	0	0	0	0	PA
DOR-pm	23	#VALUE!	DOR-pm	0	0	0	0	0	0	0	2	1	0	0	0	0	0	1	0	0	6	2	0	0	12	DOR-pm	0	0	0	0	0	0	0	0	0	0	3	0	2	1	2	0	0	0	0	3	0	11	DOR-pm
DOR-sm	29	#VALUE!	DOR-sm	0	0	0	0	0	0	0	0	0	1	5	0	0	2	4	0	0	3	0	0	0	15	DOR-sm	0	0	0	0	0	0	0	0	1	0	1	1	0	3	7	1	0	0	0	0	0	14	DOR-sm
LA	0	#VALUE!	LA	0	0	0	0	0	0	0	0	0	0	0	0	0	0	0	0	0	0	0	0	0	0	LA	0	0	0	0	0	0	0	0	0	0	0	0	0	0	0	0	0	0	0	0	0	0	LA
MB-mot	1	#VALUE!	MB-mot	0	0	0	0	0	0	0	0	0	0	0	0	0	0	0	0	0	0	0	0	0	0	MB-mot	0	0	0	0	0	0	0	0	0	0	0	0	0	0	0	0	0	1	0	0	0	1	MB-mot
MB-sen	3	#VALUE!	MB-sen	0	0	0	0	0	0	0	0	0	2	0	0	0	0	0	0	0	0	0	0	0	2	MB-sen	0	0	0	0	0	0	0	0	0	0	0	0	0	0	0	1	0	0	0	0	0	1	MB-sen
MB-sta	1	#VALUE!	MB-sta	0	0	0	0	0	0	0	0	0	0	0	0	0	0	0	0	0	0	0	0	0	0	MB-sta	0	0	0	0	0	0	0	0	0	0	0	0	0	0	0	0	0	0	0	1	0	1	MB-sta
ENT	3	#VALUE!	ENT	0	0	3	0	0	0	0	0	0	0	0	0	0	0	0	0	0	0	0	0	0	3	ENT	0	0	0	0	0	0	0	0	0	0	0	0	0	0	0	0	0	0	0	0	0	0	ENT
CA123_pyramidal/DG_granule	3	#VALUE!	CA123_pyramidal/DG_granule	0	1	0	0	0	0	0	0	0	0	0	0	0	0	0	0	0	1	0	0	0	2	CA123_pyramidal/DG_granule	0	0	0	0	0	0	0	0	0	0	0	0	0	0	0	0	1	0	0	0	0	1	CA123_pyramidal/DG_granule
CA123 / DG	7	#VALUE!	CA123 / DG	0	0	0	0	0	2	0	0	0	0	0	0	0	0	0	0	0	0	0	0	0	2	CA123 / DG	0	0	0	0	0	0	0	0	0	0	0	0	1	0	0	0	4	0	0	0	0	5	CA123 / DG
PAR	0	#VALUE!	PAR	0	0	0	0	0	0	0	0	0	0	0	0	0	0	0	0	0	0	0	0	0	0	PAR	0	0	0	0	0	0	0	0	0	0	0	0	0	0	0	0	0	0	0	0	0	0	PAR
POST	0	#VALUE!	POST	0	0	0	0	0	0	0	0	0	0	0	0	0	0	0	0	0	0	0	0	0	0	POST	0	0	0	0	0	0	0	0	0	0	0	0	0	0	0	0	0	0	0	0	0	0	POST
PRE	0	#VALUE!	PRE	0	0	0	0	0	0	0	0	0	0	0	0	0	0	0	0	0	0	0	0	0	0	PRE	0	0	0	0	0	0	0	0	0	0	0	0	0	0	0	0	0	0	0	0	0	0	PRE
SUB	11	#VALUE!	SUB	0	7	3	0	0	0	0	0	0	0	0	0	0	0	0	0	0	0	0	0	0	10	SUB	0	0	0	0	1	0	0	0	0	0	0	0	0	0	0	0	0	0	0	0	0	1	SUB
CBX-granular	2	#VALUE!	CBX-granular	0	0	0	0	0	0	0	0	0	0	0	0	0	0	0	0	0	0	2	0	0	2	CBX-granular	0	0	0	0	0	0	0	0	0	0	0	0	0	0	0	0	0	0	0	0	0	0	CBX-granular
CBX-molecular	6	#VALUE!	CBX-molecular	0	0	0	0	0	0	0	0	0	0	0	0	3	0	0	0	0	0	3	0	0	6	CBX-molecular	0	0	0	0	0	0	0	0	0	0	0	0	0	0	0	0	0	0	0	0	0	0	CBX-molecular
DN	0	#VALUE!	DN	0	0	0	0	0	0	0	0	0	0	0	0	0	0	0	0	0	0	0	0	0	0	DN	0	0	0	0	0	0	0	0	0	0	0	0	0	0	0	0	0	0	0	0	0	0	DN
P-mot	6	#VALUE!	P-mot	0	0	0	0	0	0	0	0	0	0	0	0	0	0	0	0	0	0	0	0	0	0	P-mot	0	0	0	0	0	0	0	0	0	0	0	0	0	0	0	0	0	0	0	6	0	6	P-mot
P-sat	3	#VALUE!	P-sat	0	0	0	0	0	0	0	0	0	0	0	0	0	0	0	0	0	0	0	0	0	0	P-sat	0	0	0	0	0	0	0	0	0	0	0	0	0	0	0	0	0	0	0	3	0	3	P-sat
P-sen	0	#VALUE!	P-sen	0	0	0	0	0	0	0	0	0	0	0	0	0	0	0	0	0	0	0	0	0	0	P-sen	0	0	0	0	0	0	0	0	0	0	0	0	0	0	0	0	0	0	0	0	0	0	P-sen
MY-mot	2	#VALUE!	MY-mot	0	0	0	0	0	0	0	0	0	0	1	0	0	0	0	0	0	0	0	0	0	1	MY-mot	0	0	0	0	0	0	0	0	0	0	0	0	0	0	0	0	0	0	0	1	0	1	MY-mot
MY-sat	1	#VALUE!	MY-sat	0	0	0	0	0	0	0	0	0	0	0	0	0	0	0	0	0	0	0	0	0	0	MY-sat	0	0	0	0	0	0	0	0	0	0	0	0	0	0	0	0	0	0	0	1	0	1	MY-sat
MY-sen	5	#VALUE!	MY-sen	0	0	0	0	0	0	0	0	0	0	5	0	0	0	0	0	0	0	0	0	0	5	MY-sen	0	0	0	0	0	0	0	0	0	0	0	0	0	0	0	0	0	0	0	0	0	0	MY-sen
blue gray tracts	5	#VALUE!	blue gray tracts	0	0	0	0	0	0	0	0	0	0	0	1	1	0	0	0	0	0	1	0	0	3	blue gray tracts	0	0	0	0	0	0	0	0	0	0	0	0	1	0	0	1	0	0	0	0	0	2	blue gray tracts
light grey tracts	9	#VALUE!	light grey tracts	0	0	0	0	0	0	1	0	1	0	0	0	0	0	0	0	1	1	0	0	0	4	light grey tracts	0	0	0	0	0	0	0	0	1	1	2	0	0	0	0	0	1	0	0	0	0	5	light grey tracts
CBX-tracts	0	#VALUE!	CBX-tracts	0	0	0	0	0	0	0	0	0	0	0	0	0	0	0	0	0	0	0	0	0	0	CBX-tracts	0	0	0	0	0	0	0	0	0	0	0	0	0	0	0	0	0	0	0	0	0	0	CBX-tracts
CTX tracts	0	#VALUE!	CTX tracts	0	0	0	0	0	0	0	0	0	0	0	0	0	0	0	0	0	0	0	0	0	0	CTX tracts	0	0	0	0	0	0	0	0	0	0	0	0	0	0	0	0	0	0	0	0	0	0	CTX tracts
HY-tracts	1	#VALUE!	HY-tracts	0	0	0	0	0	0	0	0	0	0	0	0	0	0	0	0	0	0	1	0	0	1	HY-tracts	0	0	0	0	0	0	0	0	0	0	0	0	0	0	0	0	0	0	0	0	0	0	HY-tracts
MB-tracts	0	#VALUE!	MB-tracts	0	0	0	0	0	0	0	0	0	0	0	0	0	0	0	0	0	0	0	0	0	0	MB-tracts	0	0	0	0	0	0	0	0	0	0	0	0	0	0	0	0	0	0	0	0	0	0	MB-tracts
MY-tracts	0	#VALUE!	MY-tracts	0	0	0	0	0	0	0	0	0	0	0	0	0	0	0	0	0	0	0	0	0	0	MY-tracts	0	0	0	0	0	0	0	0	0	0	0	0	0	0	0	0	0	0	0	0	0	0	MY-tracts
P-tracts	2	#VALUE!	P-tracts	0	0	0	0	0	0	0	0	0	0	0	0	0	0	0	0	0	0	0	0	0	0	P-tracts	0	0	0	0	0	0	0	0	0	0	0	0	0	0	0	0	0	0	0	2	0	2	P-tracts
TH-tracts	4	#VALUE!	TH-tracts	0	0	0	0	0	0	0	0	1	0	0	0	0	0	0	0	0	0	0	0	0	1	TH-tracts	0	0	0	0	0	0	0	0	0	0	0	0	1	1	0	0	0	0	0	1	0	3	TH-tracts
ventricles	2	#VALUE!	ventricles	0	0	0	0	0	0	0	0	0	0	0	0	0	0	0	1	0	0	0	0	0	1	ventricles	0	0	0	0	0	0	0	0	0	0	0	0	0	0	0	0	0	0	0	1	0	1	ventricles
TOTAL	224	#VALUE!	TOTAL	1	9	9	6	5	10	8	6	3	5	12	3	7	4	5	10	5	16	10	0	0	134	TOTAL	0	0	1	1	1	0	1	2	2	3	8	2	9	10	12	9	6	3	0	20	0	90	TOTAL
[truncated: 183 more columns]

## Sheet: CEP
Input#OfMice	TOTAL	Average per mouse	4157	_1	_2	_3	_4	_5	_6	_7	_8	_9	_10	_11	_12	_13	_14	_15	_16	_17	_18	_19	_20	_21	TOTAL	InputMouse#	_1	_2	_3	_4	_5	_6	_7	_8	_9	_10	_11	_12	_13	_14	_15	_16	_17	_18	_19	_20	_21	TOTAL	InputMouse#
ACA	0	#VALUE!	ACA	0	0	0	0	0	0	0	0	0	0	0	0	0	0	0	0	0	0	0	0	0	0	ACA	0	0	0	0	0	0	0	0	0	0	0	0	0	0	0	0	0	0	0	0	0	0	ACA
AI	0	#VALUE!	AI	0	0	0	0	0	0	0	0	0	0	0	0	0	0	0	0	0	0	0	0	0	0	AI	0	0	0	0	0	0	0	0	0	0	0	0	0	0	0	0	0	0	0	0	0	0	AI
ECT	0	#VALUE!	ECT	0	0	0	0	0	0	0	0	0	0	0	0	0	0	0	0	0	0	0	0	0	0	ECT	0	0	0	0	0	0	0	0	0	0	0	0	0	0	0	0	0	0	0	0	0	0	ECT
FRP	0	#VALUE!	FRP	0	0	0	0	0	0	0	0	0	0	0	0	0	0	0	0	0	0	0	0	0	0	FRP	0	0	0	0	0	0	0	0	0	0	0	0	0	0	0	0	0	0	0	0	0	0	FRP
GU	0	#VALUE!	GU	0	0	0	0	0	0	0	0	0	0	0	0	0	0	0	0	0	0	0	0	0	0	GU	0	0	0	0	0	0	0	0	0	0	0	0	0	0	0	0	0	0	0	0	0	0	GU
ILA2/3	0	#VALUE!	ILA2/3	0	0	0	0	0	0	0	0	0	0	0	0	0	0	0	0	0	0	0	0	0	0	ILA2/3	0	0	0	0	0	0	0	0	0	0	0	0	0	0	0	0	0	0	0	0	0	0	ILA2/3
MO	66	#VALUE!	MO	0	0	0	0	0	0	0	0	0	0	0	12	29	14	10	1	0	0	0	0	0	66	MO	0	0	0	0	0	0	0	0	0	0	0	0	0	0	0	0	0	0	0	0	0	0	MO
ORB	1	#VALUE!	ORB	0	0	0	0	0	0	0	0	0	0	0	0	0	0	0	0	0	1	0	0	0	1	ORB	0	0	0	0	0	0	0	0	0	0	0	0	0	0	0	0	0	0	0	0	0	0	ORB
PL	0	#VALUE!	PL	0	0	0	0	0	0	0	0	0	0	0	0	0	0	0	0	0	0	0	0	0	0	PL	0	0	0	0	0	0	0	0	0	0	0	0	0	0	0	0	0	0	0	0	0	0	PL
PTLp	1	#VALUE!	PTLp	0	0	0	0	0	0	0	0	0	0	1	0	0	0	0	0	0	0	0	0	0	1	PTLp	0	0	0	0	0	0	0	0	0	0	0	0	0	0	0	0	0	0	0	0	0	0	PTLp
RSP	16	#VALUE!	RSP	0	0	0	0	0	0	0	1	0	0	0	0	0	0	0	6	4	5	0	0	0	16	RSP	0	0	0	0	0	0	0	0	0	0	0	0	0	0	0	0	0	0	0	0	0	0	RSP
SS	27	#VALUE!	SS	4	5	1	2	1	4	2	0	0	0	5	2	1	0	0	0	0	0	0	0	0	27	SS	0	0	0	0	0	0	0	0	0	0	0	0	0	0	0	0	0	0	0	0	0	0	SS
VIS	20	#VALUE!	VIS	7	3	0	1	0	0	0	0	0	0	0	7	1	1	0	0	0	0	0	0	0	20	VIS	0	0	0	0	0	0	0	0	0	0	0	0	0	0	0	0	0	0	0	0	0	0	VIS
VISC	1	#VALUE!	VISC	0	0	0	1	0	0	0	0	0	0	0	0	0	0	0	0	0	0	0	0	0	1	VISC	0	0	0	0	0	0	0	0	0	0	0	0	0	0	0	0	0	0	0	0	0	0	VISC
CP	3	#VALUE!	CP	0	1	0	0	0	0	1	0	0	0	1	0	0	0	0	0	0	0	0	0	0	3	CP	0	0	0	0	0	0	0	0	0	0	0	0	0	0	0	0	0	0	0	0	0	0	CP
LS	1	#VALUE!	LS	0	0	0	0	0	0	0	0	0	0	0	0	0	0	0	0	0	1	0	0	0	1	LS	0	0	0	0	0	0	0	0	0	0	0	0	0	0	0	0	0	0	0	0	0	0	LS
sAMY	0	#VALUE!	sAMY	0	0	0	0	0	0	0	0	0	0	0	0	0	0	0	0	0	0	0	0	0	0	sAMY	0	0	0	0	0	0	0	0	0	0	0	0	0	0	0	0	0	0	0	0	0	0	sAMY
STRv	4	#VALUE!	STRv	0	0	0	0	0	0	0	0	0	0	1	0	2	1	0	0	0	0	0	0	0	4	STRv	0	0	0	0	0	0	0	0	0	0	0	0	0	0	0	0	0	0	0	0	0	0	STRv
GP	2	#VALUE!	GP	0	0	0	0	0	0	1	0	0	0	1	0	0	0	0	0	0	0	0	0	0	2	GP	0	0	0	0	0	0	0	0	0	0	0	0	0	0	0	0	0	0	0	0	0	0	GP
PALc	0	#VALUE!	PALc	0	0	0	0	0	0	0	0	0	0	0	0	0	0	0	0	0	0	0	0	0	0	PALc	0	0	0	0	0	0	0	0	0	0	0	0	0	0	0	0	0	0	0	0	0	0	PALc
PALm	0	#VALUE!	PALm	0	0	0	0	0	0	0	0	0	0	0	0	0	0	0	0	0	0	0	0	0	0	PALm	0	0	0	0	0	0	0	0	0	0	0	0	0	0	0	0	0	0	0	0	0	0	PALm
PALv	1	#VALUE!	PALv	0	0	0	0	0	0	0	0	1	0	0	0	0	0	0	0	0	0	0	0	0	1	PALv	0	0	0	0	0	0	0	0	0	0	0	0	0	0	0	0	0	0	0	0	0	0	PALv
LZ/ME	0	#VALUE!	LZ/ME	0	0	0	0	0	0	0	0	0	0	0	0	0	0	0	0	0	0	0	0	0	0	LZ/ME	0	0	0	0	0	0	0	0	0	0	0	0	0	0	0	0	0	0	0	0	0	0	LZ/ME
MEZ	0	#VALUE!	MEZ	0	0	0	0	0	0	0	0	0	0	0	0	0	0	0	0	0	0	0	0	0	0	MEZ	0	0	0	0	0	0	0	0	0	0	0	0	0	0	0	0	0	0	0	0	0	0	MEZ
PVR	0	#VALUE!	PVR	0	0	0	0	0	0	0	0	0	0	0	0	0	0	0	0	0	0	0	0	0	0	PVR	0	0	0	0	0	0	0	0	0	0	0	0	0	0	0	0	0	0	0	0	0	0	PVR
PVZ	0	#VALUE!	PVZ	0	0	0	0	0	0	0	0	0	0	0	0	0	0	0	0	0	0	0	0	0	0	PVZ	0	0	0	0	0	0	0	0	0	0	0	0	0	0	0	0	0	0	0	0	0	0	PVZ
AOB-dark/ Nlot	1	#VALUE!	AOB-dark/ Nlot	0	0	0	0	0	0	0	0	0	0	0	0	0	1	0	0	0	0	0	0	0	1	AOB-dark/ Nlot	0	0	0	0	0	0	0	0	0	0	0	0	0	0	0	0	0	0	0	0	0	0	AOB-dark/ Nlot
AOB-light	0	#VALUE!	AOB-light	0	0	0	0	0	0	0	0	0	0	0	0	0	0	0	0	0	0	0	0	0	0	AOB-light	0	0	0	0	0	0	0	0	0	0	0	0	0	0	0	0	0	0	0	0	0	0	AOB-light
AON	0	#VALUE!	AON	0	0	0	0	0	0	0	0	0	0	0	0	0	0	0	0	0	0	0	0	0	0	AON	0	0	0	0	0	0	0	0	0	0	0	0	0	0	0	0	0	0	0	0	0	0	AON
COA	0	#VALUE!	COA	0	0	0	0	0	0	0	0	0	0	0	0	0	0	0	0	0	0	0	0	0	0	COA	0	0	0	0	0	0	0	0	0	0	0	0	0	0	0	0	0	0	0	0	0	0	COA
MOB-dark	3	#VALUE!	MOB-dark	0	0	0	0	0	0	0	0	0	0	0	0	0	0	1	0	2	0	0	0	0	3	MOB-dark	0	0	0	0	0	0	0	0	0	0	0	0	0	0	0	0	0	0	0	0	0	0	MOB-dark
MOB-light	8	#VALUE!	MOB-light	0	0	0	0	0	0	0	0	0	0	0	0	0	0	0	0	8	0	0	0	0	8	MOB-light	0	0	0	0	0	0	0	0	0	0	0	0	0	0	0	0	0	0	0	0	0	0	MOB-light
PAA	0	#VALUE!	PAA	0	0	0	0	0	0	0	0	0	0	0	0	0	0	0	0	0	0	0	0	0	0	PAA	0	0	0	0	0	0	0	0	0	0	0	0	0	0	0	0	0	0	0	0	0	0	PAA
PIR	4	#VALUE!	PIR	0	0	0	0	0	0	0	0	1	0	0	3	0	0	0	0	0	0	0	0	0	4	PIR	0	0	0	0	0	0	0	0	0	0	0	0	0	0	0	0	0	0	0	0	0	0	PIR
TR	0	#VALUE!	TR	0	0	0	0	0	0	0	0	0	0	0	0	0	0	0	0	0	0	0	0	0	0	TR	0	0	0	0	0	0	0	0	0	0	0	0	0	0	0	0	0	0	0	0	0	0	TR
TT	0	#VALUE!	TT	0	0	0	0	0	0	0	0	0	0	0	0	0	0	0	0	0	0	0	0	0	0	TT	0	0	0	0	0	0	0	0	0	0	0	0	0	0	0	0	0	0	0	0	0	0	TT
BLA	0	#VALUE!	BLA	0	0	0	0	0	0	0	0	0	0	0	0	0	0	0	0	0	0	0	0	0	0	BLA	0	0	0	0	0	0	0	0	0	0	0	0	0	0	0	0	0	0	0	0	0	0	BLA
BMA	0	#VALUE!	BMA	0	0	0	0	0	0	0	0	0	0	0	0	0	0	0	0	0	0	0	0	0	0	BMA	0	0	0	0	0	0	0	0	0	0	0	0	0	0	0	0	0	0	0	0	0	0	BMA
CLA	0	#VALUE!	CLA	0	0	0	0	0	0	0	0	0	0	0	0	0	0	0	0	0	0	0	0	0	0	CLA	0	0	0	0	0	0	0	0	0	0	0	0	0	0	0	0	0	0	0	0	0	0	CLA
EP	0	#VALUE!	EP	0	0	0	0	0	0	0	0	0	0	0	0	0	0	0	0	0	0	0	0	0	0	EP	0	0	0	0	0	0	0	0	0	0	0	0	0	0	0	0	0	0	0	0	0	0	EP
PA	0	#VALUE!	PA	0	0	0	0	0	0	0	0	0	0	0	0	0	0	0	0	0	0	0	0	0	0	PA	0	0	0	0	0	0	0	0	0	0	0	0	0	0	0	0	0	0	0	0	0	0	PA
DOR-pm	9	#VALUE!	DOR-pm	0	0	0	0	0	0	0	0	0	0	0	3	1	0	0	1	1	3	0	0	0	9	DOR-pm	0	0	0	0	0	0	0	0	0	0	0	0	0	0	0	0	0	0	0	0	0	0	DOR-pm
DOR-sm	4	#VALUE!	DOR-sm	0	0	0	0	0	0	0	0	1	0	3	0	0	0	0	0	0	0	0	0	0	4	DOR-sm	0	0	0	0	0	0	0	0	0	0	0	0	0	0	0	0	0	0	0	0	0	0	DOR-sm
LA	0	#VALUE!	LA	0	0	0	0	0	0	0	0	0	0	0	0	0	0	0	0	0	0	0	0	0	0	LA	0	0	0	0	0	0	0	0	0	0	0	0	0	0	0	0	0	0	0	0	0	0	LA
MB-mot	7	#VALUE!	MB-mot	0	0	0	0	0	0	0	0	0	0	0	1	0	0	0	1	2	3	0	0	0	7	MB-mot	0	0	0	0	0	0	0	0	0	0	0	0	0	0	0	0	0	0	0	0	0	0	MB-mot
MB-sen	5	#VALUE!	MB-sen	0	0	0	0	0	0	0	0	0	0	0	0	0	0	0	2	3	0	0	0	0	5	MB-sen	0	0	0	0	0	0	0	0	0	0	0	0	0	0	0	0	0	0	0	0	0	0	MB-sen
MB-sta	2	#VALUE!	MB-sta	0	0	0	0	0	0	0	0	0	0	0	2	0	0	0	0	0	0	0	0	0	2	MB-sta	0	0	0	0	0	0	0	0	0	0	0	0	0	0	0	0	0	0	0	0	0	0	MB-sta
ENT	3	#VALUE!	ENT	1	1	0	1	0	0	0	0	0	0	0	0	0	0	0	0	0	0	0	0	0	3	ENT	0	0	0	0	0	0	0	0	0	0	0	0	0	0	0	0	0	0	0	0	0	0	ENT
CA123_pyramidal/DG_granule	0	#VALUE!	CA123_pyramidal/DG_granule	0	0	0	0	0	0	0	0	0	0	0	0	0	0	0	0	0	0	0	0	0	0	CA123_pyramidal/DG_granule	0	0	0	0	0	0	0	0	0	0	0	0	0	0	0	0	0	0	0	0	0	0	CA123_pyramidal/DG_granule
CA123 / DG	2	#VALUE!	CA123 / DG	0	0	0	0	0	0	0	0	1	0	1	0	0	0	0	0	0	0	0	0	0	2	CA123 / DG	0	0	0	0	0	0	0	0	0	0	0	0	0	0	0	0	0	0	0	0	0	0	CA123 / DG
PAR	3	#VALUE!	PAR	0	0	0	0	0	3	0	0	0	0	0	0	0	0	0	0	0	0	0	0	0	3	PAR	0	0	0	0	0	0	0	0	0	0	0	0	0	0	0	0	0	0	0	0	0	0	PAR
POST	1	#VALUE!	POST	0	0	0	0	0	0	0	0	1	0	0	0	0	0	0	0	0	0	0	0	0	1	POST	0	0	0	0	0	0	0	0	0	0	0	0	0	0	0	0	0	0	0	0	0	0	POST
PRE	1	#VALUE!	PRE	0	0	0	0	0	1	0	0	0	0	0	0	0	0	0	0	0	0	0	0	0	1	PRE	0	0	0	0	0	0	0	0	0	0	0	0	0	0	0	0	0	0	0	0	0	0	PRE
SUB	5	#VALUE!	SUB	0	0	0	0	3	1	0	1	0	0	0	0	0	0	0	0	0	0	0	0	0	5	SUB	0	0	0	0	0	0	0	0	0	0	0	0	0	0	0	0	0	0	0	0	0	0	SUB
CBX-granular	7	#VALUE!	CBX-granular	0	0	0	0	0	0	0	0	0	0	2	0	2	1	0	0	0	2	0	0	0	7	CBX-granular	0	0	0	0	0	0	0	0	0	0	0	0	0	0	0	0	0	0	0	0	0	0	CBX-granular
CBX-molecular	3	#VALUE!	CBX-molecular	0	0	0	0	0	0	0	0	0	0	0	0	0	0	0	3	0	0	0	0	0	3	CBX-molecular	0	0	0	0	0	0	0	0	0	0	0	0	0	0	0	0	0	0	0	0	0	0	CBX-molecular
DN	3	#VALUE!	DN	0	0	0	0	0	0	0	0	0	0	1	0	0	0	0	2	0	0	0	0	0	3	DN	0	0	0	0	0	0	0	0	0	0	0	0	0	0	0	0	0	0	0	0	0	0	DN
P-mot	3	#VALUE!	P-mot	0	0	0	0	0	0	0	0	0	0	0	0	0	0	0	0	0	3	0	0	0	3	P-mot	0	0	0	0	0	0	0	0	0	0	0	0	0	0	0	0	0	0	0	0	0	0	P-mot
P-sat	7	#VALUE!	P-sat	0	0	0	0	0	0	0	0	0	0	0	2	0	0	0	1	4	0	0	0	0	7	P-sat	0	0	0	0	0	0	0	0	0	0	0	0	0	0	0	0	0	0	0	0	0	0	P-sat
P-sen	0	#VALUE!	P-sen	0	0	0	0	0	0	0	0	0	0	0	0	0	0	0	0	0	0	0	0	0	0	P-sen	0	0	0	0	0	0	0	0	0	0	0	0	0	0	0	0	0	0	0	0	0	0	P-sen
MY-mot	2	#VALUE!	MY-mot	0	0	0	0	0	0	0	0	0	0	0	1	0	0	0	1	0	0	0	0	0	2	MY-mot	0	0	0	0	0	0	0	0	0	0	0	0	0	0	0	0	0	0	0	0	0	0	MY-mot
MY-sat	0	#VALUE!	MY-sat	0	0	0	0	0	0	0	0	0	0	0	0	0	0	0	0	0	0	0	0	0	0	MY-sat	0	0	0	0	0	0	0	0	0	0	0	0	0	0	0	0	0	0	0	0	0	0	MY-sat
MY-sen	1	#VALUE!	MY-sen	0	0	0	0	0	0	0	0	0	0	0	0	0	0	0	1	0	0	0	0	0	1	MY-sen	0	0	0	0	0	0	0	0	0	0	0	0	0	0	0	0	0	0	0	0	0	0	MY-sen
blue gray tracts	1	#VALUE!	blue gray tracts	0	0	0	0	0	0	0	0	0	0	0	0	0	0	0	0	0	1	0	0	0	1	blue gray tracts	0	0	0	0	0	0	0	0	0	0	0	0	0	0	0	0	0	0	0	0	0	0	blue gray tracts
light grey tracts	12	#VALUE!	light grey tracts	0	0	0	0	0	0	4	0	1	0	0	2	0	0	0	0	0	5	0	0	0	12	light grey tracts	0	0	0	0	0	0	0	0	0	0	0	0	0	0	0	0	0	0	0	0	0	0	light grey tracts
CBX-tracts	0	#VALUE!	CBX-tracts	0	0	0	0	0	0	0	0	0	0	0	0	0	0	0	0	0	0	0	0	0	0	CBX-tracts	0	0	0	0	0	0	0	0	0	0	0	0	0	0	0	0	0	0	0	0	0	0	CBX-tracts
CTX tracts	0	#VALUE!	CTX tracts	0	0	0	0	0	0	0	0	0	0	0	0	0	0	0	0	0	0	0	0	0	0	CTX tracts	0	0	0	0	0	0	0	0	0	0	0	0	0	0	0	0	0	0	0	0	0	0	CTX tracts
HY-tracts	0	#VALUE!	HY-tracts	0	0	0	0	0	0	0	0	0	0	0	0	0	0	0	0	0	0	0	0	0	0	HY-tracts	0	0	0	0	0	0	0	0	0	0	0	0	0	0	0	0	0	0	0	0	0	0	HY-tracts
MB-tracts	5	#VALUE!	MB-tracts	0	0	0	0	0	0	0	0	0	0	0	1	1	0	0	0	0	3	0	0	0	5	MB-tracts	0	0	0	0	0	0	0	0	0	0	0	0	0	0	0	0	0	0	0	0	0	0	MB-tracts
MY-tracts	0	#VALUE!	MY-tracts	0	0	0	0	0	0	0	0	0	0	0	0	0	0	0	0	0	0	0	0	0	0	MY-tracts	0	0	0	0	0	0	0	0	0	0	0	0	0	0	0	0	0	0	0	0	0	0	MY-tracts
P-tracts	0	#VALUE!	P-tracts	0	0	0	0	0	0	0	0	0	0	0	0	0	0	0	0	0	0	0	0	0	0	P-tracts	0	0	0	0	0	0	0	0	0	0	0	0	0	0	0	0	0	0	0	0	0	0	P-tracts
TH-tracts	1	#VALUE!	TH-tracts	0	0	0	0	0	0	0	0	0	0	0	0	0	0	0	0	0	1	0	0	0	1	TH-tracts	0	0	0	0	0	0	0	0	0	0	0	0	0	0	0	0	0	0	0	0	0	0	TH-tracts
ventricles	1	#VALUE!	ventricles	0	0	0	0	0	0	0	0	0	0	0	1	0	0	0	0	0	0	0	0	0	1	ventricles	0	0	0	0	0	0	0	0	0	0	0	0	0	0	0	0	0	0	0	0	0	0	ventricles
TOTAL	247	#VALUE!	TOTAL	12	10	1	5	4	9	8	2	6	0	16	37	37	18	11	19	24	28	0	0	0	247	TOTAL	0	0	0	0	0	0	0	0	0	0	0	0	0	0	0	0	0	0	0	0	0	0	TOTAL
[truncated: 183 more columns]

## Sheet: Saline
Input#OfMice	TOTAL	Average per mouse	InputMouse#	_1	_2	_3	_4	_5	_6	_7	_8	_9	_10	_11	_12	_13	_14	_15	_16	_17	_18	_19	_20	_21	TOTAL	InputMouse#	_1	_2	_3	_4	_5	_6	_7	_8	_9	_10	_11	_12	_13	_14	_15	_16	_17	_18	_19	_20	_21	TOTAL	InputMouse#
ACA	0	#VALUE!	ACA	0	0	0	0	0	0	0	0	0	0	0	0	0	0	0	0	0	0	0	0	0	0	ACA	0	0	0	0	0	0	0	0	0	0	0	0	0	0	0	0	0	0	0	0	0	0	ACA
AI	0	#VALUE!	AI	0	0	0	0	0	0	0	0	0	0	0	0	0	0	0	0	0	0	0	0	0	0	AI	0	0	0	0	0	0	0	0	0	0	0	0	0	0	0	0	0	0	0	0	0	0	AI
ECT	0	#VALUE!	ECT	0	0	0	0	0	0	0	0	0	0	0	0	0	0	0	0	0	0	0	0	0	0	ECT	0	0	0	0	0	0	0	0	0	0	0	0	0	0	0	0	0	0	0	0	0	0	ECT
FRP	0	#VALUE!	FRP	0	0	0	0	0	0	0	0	0	0	0	0	0	0	0	0	0	0	0	0	0	0	FRP	0	0	0	0	0	0	0	0	0	0	0	0	0	0	0	0	0	0	0	0	0	0	FRP
GU	0	#VALUE!	GU	0	0	0	0	0	0	0	0	0	0	0	0	0	0	0	0	0	0	0	0	0	0	GU	0	0	0	0	0	0	0	0	0	0	0	0	0	0	0	0	0	0	0	0	0	0	GU
ILA2/3	0	#VALUE!	ILA2/3	0	0	0	0	0	0	0	0	0	0	0	0	0	0	0	0	0	0	0	0	0	0	ILA2/3	0	0	0	0	0	0	0	0	0	0	0	0	0	0	0	0	0	0	0	0	0	0	ILA2/3
MO	0	#VALUE!	MO	0	0	0	0	0	0	0	0	0	0	0	0	0	0	0	0	0	0	0	0	0	0	MO	0	0	0	0	0	0	0	0	0	0	0	0	0	0	0	0	0	0	0	0	0	0	MO
ORB	0	#VALUE!	ORB	0	0	0	0	0	0	0	0	0	0	0	0	0	0	0	0	0	0	0	0	0	0	ORB	0	0	0	0	0	0	0	0	0	0	0	0	0	0	0	0	0	0	0	0	0	0	ORB
PL	0	#VALUE!	PL	0	0	0	0	0	0	0	0	0	0	0	0	0	0	0	0	0	0	0	0	0	0	PL	0	0	0	0	0	0	0	0	0	0	0	0	0	0	0	0	0	0	0	0	0	0	PL
PTLp	0	#VALUE!	PTLp	0	0	0	0	0	0	0	0	0	0	0	0	0	0	0	0	0	0	0	0	0	0	PTLp	0	0	0	0	0	0	0	0	0	0	0	0	0	0	0	0	0	0	0	0	0	0	PTLp
RSP	0	#VALUE!	RSP	0	0	0	0	0	0	0	0	0	0	0	0	0	0	0	0	0	0	0	0	0	0	RSP	0	0	0	0	0	0	0	0	0	0	0	0	0	0	0	0	0	0	0	0	0	0	RSP
SS	0	#VALUE!	SS	0	0	0	0	0	0	0	0	0	0	0	0	0	0	0	0	0	0	0	0	0	0	SS	0	0	0	0	0	0	0	0	0	0	0	0	0	0	0	0	0	0	0	0	0	0	SS
VIS	0	#VALUE!	VIS	0	0	0	0	0	0	0	0	0	0	0	0	0	0	0	0	0	0	0	0	0	0	VIS	0	0	0	0	0	0	0	0	0	0	0	0	0	0	0	0	0	0	0	0	0	0	VIS
VISC	0	#VALUE!	VISC	0	0	0	0	0	0	0	0	0	0	0	0	0	0	0	0	0	0	0	0	0	0	VISC	0	0	0	0	0	0	0	0	0	0	0	0	0	0	0	0	0	0	0	0	0	0	VISC
CP	0	#VALUE!	CP	0	0	0	0	0	0	0	0	0	0	0	0	0	0	0	0	0	0	0	0	0	0	CP	0	0	0	0	0	0	0	0	0	0	0	0	0	0	0	0	0	0	0	0	0	0	CP
LS	0	#VALUE!	LS	0	0	0	0	0	0	0	0	0	0	0	0	0	0	0	0	0	0	0	0	0	0	LS	0	0	0	0	0	0	0	0	0	0	0	0	0	0	0	0	0	0	0	0	0	0	LS
sAMY	0	#VALUE!	sAMY	0	0	0	0	0	0	0	0	0	0	0	0	0	0	0	0	0	0	0	0	0	0	sAMY	0	0	0	0	0	0	0	0	0	0	0	0	0	0	0	0	0	0	0	0	0	0	sAMY
STRv	0	#VALUE!	STRv	0	0	0	0	0	0	0	0	0	0	0	0	0	0	0	0	0	0	0	0	0	0	STRv	0	0	0	0	0	0	0	0	0	0	0	0	0	0	0	0	0	0	0	0	0	0	STRv
GP	0	#VALUE!	GP	0	0	0	0	0	0	0	0	0	0	0	0	0	0	0	0	0	0	0	0	0	0	GP	0	0	0	0	0	0	0	0	0	0	0	0	0	0	0	0	0	0	0	0	0	0	GP
PALc	0	#VALUE!	PALc	0	0	0	0	0	0	0	0	0	0	0	0	0	0	0	0	0	0	0	0	0	0	PALc	0	0	0	0	0	0	0	0	0	0	0	0	0	0	0	0	0	0	0	0	0	0	PALc
PALm	0	#VALUE!	PALm	0	0	0	0	0	0	0	0	0	0	0	0	0	0	0	0	0	0	0	0	0	0	PALm	0	0	0	0	0	0	0	0	0	0	0	0	0	0	0	0	0	0	0	0	0	0	PALm
PALv	0	#VALUE!	PALv	0	0	0	0	0	0	0	0	0	0	0	0	0	0	0	0	0	0	0	0	0	0	PALv	0	0	0	0	0	0	0	0	0	0	0	0	0	0	0	0	0	0	0	0	0	0	PALv
LZ/ME	0	#VALUE!	LZ/ME	0	0	0	0	0	0	0	0	0	0	0	0	0	0	0	0	0	0	0	0	0	0	LZ/ME	0	0	0	0	0	0	0	0	0	0	0	0	0	0	0	0	0	0	0	0	0	0	LZ/ME
MEZ	0	#VALUE!	MEZ	0	0	0	0	0	0	0	0	0	0	0	0	0	0	0	0	0	0	0	0	0	0	MEZ	0	0	0	0	0	0	0	0	0	0	0	0	0	0	0	0	0	0	0	0	0	0	MEZ
PVR	0	#VALUE!	PVR	0	0	0	0	0	0	0	0	0	0	0	0	0	0	0	0	0	0	0	0	0	0	PVR	0	0	0	0	0	0	0	0	0	0	0	0	0	0	0	0	0	0	0	0	0	0	PVR
PVZ	0	#VALUE!	PVZ	0	0	0	0	0	0	0	0	0	0	0	0	0	0	0	0	0	0	0	0	0	0	PVZ	0	0	0	0	0	0	0	0	0	0	0	0	0	0	0	0	0	0	0	0	0	0	PVZ
AOB-dark/ Nlot	0	#VALUE!	AOB-dark/ Nlot	0	0	0	0	0	0	0	0	0	0	0	0	0	0	0	0	0	0	0	0	0	0	AOB-dark/ Nlot	0	0	0	0	0	0	0	0	0	0	0	0	0	0	0	0	0	0	0	0	0	0	AOB-dark/ Nlot
AOB-light	0	#VALUE!	AOB-light	0	0	0	0	0	0	0	0	0	0	0	0	0	0	0	0	0	0	0	0	0	0	AOB-light	0	0	0	0	0	0	0	0	0	0	0	0	0	0	0	0	0	0	0	0	0	0	AOB-light
AON	0	#VALUE!	AON	0	0	0	0	0	0	0	0	0	0	0	0	0	0	0	0	0	0	0	0	0	0	AON	0	0	0	0	0	0	0	0	0	0	0	0	0	0	0	0	0	0	0	0	0	0	AON
COA	0	#VALUE!	COA	0	0	0	0	0	0	0	0	0	0	0	0	0	0	0	0	0	0	0	0	0	0	COA	0	0	0	0	0	0	0	0	0	0	0	0	0	0	0	0	0	0	0	0	0	0	COA
MOB-dark	0	#VALUE!	MOB-dark	0	0	0	0	0	0	0	0	0	0	0	0	0	0	0	0	0	0	0	0	0	0	MOB-dark	0	0	0	0	0	0	0	0	0	0	0	0	0	0	0	0	0	0	0	0	0	0	MOB-dark
MOB-light	0	#VALUE!	MOB-light	0	0	0	0	0	0	0	0	0	0	0	0	0	0	0	0	0	0	0	0	0	0	MOB-light	0	0	0	0	0	0	0	0	0	0	0	0	0	0	0	0	0	0	0	0	0	0	MOB-light
PAA	0	#VALUE!	PAA	0	0	0	0	0	0	0	0	0	0	0	0	0	0	0	0	0	0	0	0	0	0	PAA	0	0	0	0	0	0	0	0	0	0	0	0	0	0	0	0	0	0	0	0	0	0	PAA
PIR	0	#VALUE!	PIR	0	0	0	0	0	0	0	0	0	0	0	0	0	0	0	0	0	0	0	0	0	0	PIR	0	0	0	0	0	0	0	0	0	0	0	0	0	0	0	0	0	0	0	0	0	0	PIR
TR	0	#VALUE!	TR	0	0	0	0	0	0	0	0	0	0	0	0	0	0	0	0	0	0	0	0	0	0	TR	0	0	0	0	0	0	0	0	0	0	0	0	0	0	0	0	0	0	0	0	0	0	TR
TT	0	#VALUE!	TT	0	0	0	0	0	0	0	0	0	0	0	0	0	0	0	0	0	0	0	0	0	0	TT	0	0	0	0	0	0	0	0	0	0	0	0	0	0	0	0	0	0	0	0	0	0	TT
BLA	0	#VALUE!	BLA	0	0	0	0	0	0	0	0	0	0	0	0	0	0	0	0	0	0	0	0	0	0	BLA	0	0	0	0	0	0	0	0	0	0	0	0	0	0	0	0	0	0	0	0	0	0	BLA
BMA	0	#VALUE!	BMA	0	0	0	0	0	0	0	0	0	0	0	0	0	0	0	0	0	0	0	0	0	0	BMA	0	0	0	0	0	0	0	0	0	0	0	0	0	0	0	0	0	0	0	0	0	0	BMA
CLA	0	#VALUE!	CLA	0	0	0	0	0	0	0	0	0	0	0	0	0	0	0	0	0	0	0	0	0	0	CLA	0	0	0	0	0	0	0	0	0	0	0	0	0	0	0	0	0	0	0	0	0	0	CLA
EP	0	#VALUE!	EP	0	0	0	0	0	0	0	0	0	0	0	0	0	0	0	0	0	0	0	0	0	0	EP	0	0	0	0	0	0	0	0	0	0	0	0	0	0	0	0	0	0	0	0	0	0	EP
PA	0	#VALUE!	PA	0	0	0	0	0	0	0	0	0	0	0	0	0	0	0	0	0	0	0	0	0	0	PA	0	0	0	0	0	0	0	0	0	0	0	0	0	0	0	0	0	0	0	0	0	0	PA
DOR-pm	0	#VALUE!	DOR-pm	0	0	0	0	0	0	0	0	0	0	0	0	0	0	0	0	0	0	0	0	0	0	DOR-pm	0	0	0	0	0	0	0	0	0	0	0	0	0	0	0	0	0	0	0	0	0	0	DOR-pm
DOR-sm	0	#VALUE!	DOR-sm	0	0	0	0	0	0	0	0	0	0	0	0	0	0	0	0	0	0	0	0	0	0	DOR-sm	0	0	0	0	0	0	0	0	0	0	0	0	0	0	0	0	0	0	0	0	0	0	DOR-sm
LA	0	#VALUE!	LA	0	0	0	0	0	0	0	0	0	0	0	0	0	0	0	0	0	0	0	0	0	0	LA	0	0	0	0	0	0	0	0	0	0	0	0	0	0	0	0	0	0	0	0	0	0	LA
MB-mot	0	#VALUE!	MB-mot	0	0	0	0	0	0	0	0	0	0	0	0	0	0	0	0	0	0	0	0	0	0	MB-mot	0	0	0	0	0	0	0	0	0	0	0	0	0	0	0	0	0	0	0	0	0	0	MB-mot
MB-sen	0	#VALUE!	MB-sen	0	0	0	0	0	0	0	0	0	0	0	0	0	0	0	0	0	0	0	0	0	0	MB-sen	0	0	0	0	0	0	0	0	0	0	0	0	0	0	0	0	0	0	0	0	0	0	MB-sen
MB-sta	0	#VALUE!	MB-sta	0	0	0	0	0	0	0	0	0	0	0	0	0	0	0	0	0	0	0	0	0	0	MB-sta	0	0	0	0	0	0	0	0	0	0	0	0	0	0	0	0	0	0	0	0	0	0	MB-sta
ENT	0	#VALUE!	ENT	0	0	0	0	0	0	0	0	0	0	0	0	0	0	0	0	0	0	0	0	0	0	ENT	0	0	0	0	0	0	0	0	0	0	0	0	0	0	0	0	0	0	0	0	0	0	ENT
CA123_pyramidal/DG_granule	0	#VALUE!	CA123_pyramidal/DG_granule	0	0	0	0	0	0	0	0	0	0	0	0	0	0	0	0	0	0	0	0	0	0	CA123_pyramidal/DG_granule	0	0	0	0	0	0	0	0	0	0	0	0	0	0	0	0	0	0	0	0	0	0	CA123_pyramidal/DG_granule
CA123 / DG	0	#VALUE!	CA123 / DG	0	0	0	0	0	0	0	0	0	0	0	0	0	0	0	0	0	0	0	0	0	0	CA123 / DG	0	0	0	0	0	0	0	0	0	0	0	0	0	0	0	0	0	0	0	0	0	0	CA123 / DG
PAR	0	#VALUE!	PAR	0	0	0	0	0	0	0	0	0	0	0	0	0	0	0	0	0	0	0	0	0	0	PAR	0	0	0	0	0	0	0	0	0	0	0	0	0	0	0	0	0	0	0	0	0	0	PAR
POST	0	#VALUE!	POST	0	0	0	0	0	0	0	0	0	0	0	0	0	0	0	0	0	0	0	0	0	0	POST	0	0	0	0	0	0	0	0	0	0	0	0	0	0	0	0	0	0	0	0	0	0	POST
PRE	0	#VALUE!	PRE	0	0	0	0	0	0	0	0	0	0	0	0	0	0	0	0	0	0	0	0	0	0	PRE	0	0	0	0	0	0	0	0	0	0	0	0	0	0	0	0	0	0	0	0	0	0	PRE
SUB	0	#VALUE!	SUB	0	0	0	0	0	0	0	0	0	0	0	0	0	0	0	0	0	0	0	0	0	0	SUB	0	0	0	0	0	0	0	0	0	0	0	0	0	0	0	0	0	0	0	0	0	0	SUB
CBX-granular	0	#VALUE!	CBX-granular	0	0	0	0	0	0	0	0	0	0	0	0	0	0	0	0	0	0	0	0	0	0	CBX-granular	0	0	0	0	0	0	0	0	0	0	0	0	0	0	0	0	0	0	0	0	0	0	CBX-granular
CBX-molecular	0	#VALUE!	CBX-molecular	0	0	0	0	0	0	0	0	0	0	0	0	0	0	0	0	0	0	0	0	0	0	CBX-molecular	0	0	0	0	0	0	0	0	0	0	0	0	0	0	0	0	0	0	0	0	0	0	CBX-molecular
DN	0	#VALUE!	DN	0	0	0	0	0	0	0	0	0	0	0	0	0	0	0	0	0	0	0	0	0	0	DN	0	0	0	0	0	0	0	0	0	0	0	0	0	0	0	0	0	0	0	0	0	0	DN
P-mot	0	#VALUE!	P-mot	0	0	0	0	0	0	0	0	0	0	0	0	0	0	0	0	0	0	0	0	0	0	P-mot	0	0	0	0	0	0	0	0	0	0	0	0	0	0	0	0	0	0	0	0	0	0	P-mot
P-sat	0	#VALUE!	P-sat	0	0	0	0	0	0	0	0	0	0	0	0	0	0	0	0	0	0	0	0	0	0	P-sat	0	0	0	0	0	0	0	0	0	0	0	0	0	0	0	0	0	0	0	0	0	0	P-sat
P-sen	0	#VALUE!	P-sen	0	0	0	0	0	0	0	0	0	0	0	0	0	0	0	0	0	0	0	0	0	0	P-sen	0	0	0	0	0	0	0	0	0	0	0	0	0	0	0	0	0	0	0	0	0	0	P-sen
MY-mot	0	#VALUE!	MY-mot	0	0	0	0	0	0	0	0	0	0	0	0	0	0	0	0	0	0	0	0	0	0	MY-mot	0	0	0	0	0	0	0	0	0	0	0	0	0	0	0	0	0	0	0	0	0	0	MY-mot
MY-sat	0	#VALUE!	MY-sat	0	0	0	0	0	0	0	0	0	0	0	0	0	0	0	0	0	0	0	0	0	0	MY-sat	0	0	0	0	0	0	0	0	0	0	0	0	0	0	0	0	0	0	0	0	0	0	MY-sat
MY-sen	0	#VALUE!	MY-sen	0	0	0	0	0	0	0	0	0	0	0	0	0	0	0	0	0	0	0	0	0	0	MY-sen	0	0	0	0	0	0	0	0	0	0	0	0	0	0	0	0	0	0	0	0	0	0	MY-sen
blue gray tracts	0	#VALUE!	blue gray tracts	0	0	0	0	0	0	0	0	0	0	0	0	0	0	0	0	0	0	0	0	0	0	blue gray tracts	0	0	0	0	0	0	0	0	0	0	0	0	0	0	0	0	0	0	0	0	0	0	blue gray tracts
light grey tracts	0	#VALUE!	light grey tracts	0	0	0	0	0	0	0	0	0	0	0	0	0	0	0	0	0	0	0	0	0	0	light grey tracts	0	0	0	0	0	0	0	0	0	0	0	0	0	0	0	0	0	0	0	0	0	0	light grey tracts
CBX-tracts	0	#VALUE!	CBX-tracts	0	0	0	0	0	0	0	0	0	0	0	0	0	0	0	0	0	0	0	0	0	0	CBX-tracts	0	0	0	0	0	0	0	0	0	0	0	0	0	0	0	0	0	0	0	0	0	0	CBX-tracts
CTX tracts	0	#VALUE!	CTX tracts	0	0	0	0	0	0	0	0	0	0	0	0	0	0	0	0	0	0	0	0	0	0	CTX tracts	0	0	0	0	0	0	0	0	0	0	0	0	0	0	0	0	0	0	0	0	0	0	CTX tracts
HY-tracts	0	#VALUE!	HY-tracts	0	0	0	0	0	0	0	0	0	0	0	0	0	0	0	0	0	0	0	0	0	0	HY-tracts	0	0	0	0	0	0	0	0	0	0	0	0	0	0	0	0	0	0	0	0	0	0	HY-tracts
MB-tracts	0	#VALUE!	MB-tracts	0	0	0	0	0	0	0	0	0	0	0	0	0	0	0	0	0	0	0	0	0	0	MB-tracts	0	0	0	0	0	0	0	0	0	0	0	0	0	0	0	0	0	0	0	0	0	0	MB-tracts
MY-tracts	0	#VALUE!	MY-tracts	0	0	0	0	0	0	0	0	0	0	0	0	0	0	0	0	0	0	0	0	0	0	MY-tracts	0	0	0	0	0	0	0	0	0	0	0	0	0	0	0	0	0	0	0	0	0	0	MY-tracts
P-tracts	0	#VALUE!	P-tracts	0	0	0	0	0	0	0	0	0	0	0	0	0	0	0	0	0	0	0	0	0	0	P-tracts	0	0	0	0	0	0	0	0	0	0	0	0	0	0	0	0	0	0	0	0	0	0	P-tracts
TH-tracts	0	#VALUE!	TH-tracts	0	0	0	0	0	0	0	0	0	0	0	0	0	0	0	0	0	0	0	0	0	0	TH-tracts	0	0	0	0	0	0	0	0	0	0	0	0	0	0	0	0	0	0	0	0	0	0	TH-tracts
ventricles	0	#VALUE!	ventricles	0	0	0	0	0	0	0	0	0	0	0	0	0	0	0	0	0	0	0	0	0	0	ventricles	0	0	0	0	0	0	0	0	0	0	0	0	0	0	0	0	0	0	0	0	0	0	ventricles
TOTAL	0	#VALUE!	TOTAL	0	0	0	0	0	0	0	0	0	0	0	0	0	0	0	0	0	0	0	0	0	0	TOTAL	0	0	0	0	0	0	0	0	0	0	0	0	0	0	0	0	0	0	0	0	0	0	TOTAL
[truncated: 183 more columns]

## Sheet: PcA Totals
Region	4150	4151	InputMouse#	InputMouse#	InputMouse#	InputMouse#	InputMouse#	InputMouse#	InputMouse#	InputMouse#	TOTAL			Isocortex												NORMALIZE	Region	4150	4151	InputMouse#	InputMouse#	InputMouse#	InputMouse#	InputMouse#	InputMouse#	InputMouse#	InputMouse#	AVERAGE	SD
ACA	0	0	0	0	0	0	0	0	0	0	0				4150	4151	InputMouse#	InputMouse#	InputMouse#	InputMouse#	InputMouse#	InputMouse#	InputMouse#	InputMouse#	TOTAL		ACA	0	0	#DIV/0!	#DIV/0!	#DIV/0!	#DIV/0!	#DIV/0!	#DIV/0!	#DIV/0!	#DIV/0!	#DIV/0!	#DIV/0!
AI	11	0	0	0	0	0	0	0	0	0	11			ACA	0	0	0	0	0	0	0	0	0	0	0		AI	10.7744	0	#DIV/0!	#DIV/0!	#DIV/0!	#DIV/0!	#DIV/0!	#DIV/0!	#DIV/0!	#DIV/0!	#DIV/0!	#DIV/0!
ECT	0	0	0	0	0	0	0	0	0	0	0			AI	11	0	0	0	0	0	0	0	0	0	11		ECT	0	0	#DIV/0!	#DIV/0!	#DIV/0!	#DIV/0!	#DIV/0!	#DIV/0!	#DIV/0!	#DIV/0!	#DIV/0!	#DIV/0!
FRP	0	0	0	0	0	0	0	0	0	0	0			ECT	0	0	0	0	0	0	0	0	0	0	0		FRP	0	0	#DIV/0!	#DIV/0!	#DIV/0!	#DIV/0!	#DIV/0!	#DIV/0!	#DIV/0!	#DIV/0!	#DIV/0!	#DIV/0!
GU	1	0	0	0	0	0	0	0	0	0	1			FRP	0	0	0	0	0	0	0	0	0	0	0		GU	4.90213	0	#DIV/0!	#DIV/0!	#DIV/0!	#DIV/0!	#DIV/0!	#DIV/0!	#DIV/0!	#DIV/0!	#DIV/0!	#DIV/0!
ILA2/3	0	0	0	0	0	0	0	0	0	0	0			GU	1	0	0	0	0	0	0	0	0	0	1		ILA2/3	0	0	#DIV/0!	#DIV/0!	#DIV/0!	#DIV/0!	#DIV/0!	#DIV/0!	#DIV/0!	#DIV/0!	#DIV/0!	#DIV/0!
MO	1	2	0	0	0	0	0	0	0	0	3			ILA2/3	0	0	0	0	0	0	0	0	0	0	0		MO	0.125208	0.37284	#DIV/0!	#DIV/0!	#DIV/0!	#DIV/0!	#DIV/0!	#DIV/0!	#DIV/0!	#DIV/0!	#DIV/0!	#DIV/0!
ORB	0	2	0	0	0	0	0	0	0	0	2			MO	1	2	0	0	0	0	0	0	0	0	3		ORB	0	1.32102	#DIV/0!	#DIV/0!	#DIV/0!	#DIV/0!	#DIV/0!	#DIV/0!	#DIV/0!	#DIV/0!	#DIV/0!	#DIV/0!
PL	3	0	0	0	0	0	0	0	0	0	3			ORB	0	2	0	0	0	0	0	0	0	0	2		PL	7.26495	0	#DIV/0!	#DIV/0!	#DIV/0!	#DIV/0!	#DIV/0!	#DIV/0!	#DIV/0!	#DIV/0!	#DIV/0!	#DIV/0!
PTLp	5	0	0	0	0	0	0	0	0	0	5			PL	3	0	0	0	0	0	0	0	0	0	3		PTLp	10.5235	0	#DIV/0!	#DIV/0!	#DIV/0!	#DIV/0!	#DIV/0!	#DIV/0!	#DIV/0!	#DIV/0!	#DIV/0!	#DIV/0!
RSP	0	1	0	0	0	0	0	0	0	0	1			PTLp	5	0	0	0	0	0	0	0	0	0	5		RSP	0	0.570062	#DIV/0!	#DIV/0!	#DIV/0!	#DIV/0!	#DIV/0!	#DIV/0!	#DIV/0!	#DIV/0!	#DIV/0!	#DIV/0!
SS	13	2	0	0	0	0	0	0	0	0	15			RSP	0	1	0	0	0	0	0	0	0	0	1		SS	1.55905	0.357116	#DIV/0!	#DIV/0!	#DIV/0!	#DIV/0!	#DIV/0!	#DIV/0!	#DIV/0!	#DIV/0!	#DIV/0!	#DIV/0!
VIS	7	2	0	0	0	0	0	0	0	0	9			SS	13	2	0	0	0	0	0	0	0	0	15		VIS	1.61202	0.685748	#DIV/0!	#DIV/0!	#DIV/0!	#DIV/0!	#DIV/0!	#DIV/0!	#DIV/0!	#DIV/0!	#DIV/0!	#DIV/0!
VISC	0	0	0	0	0	0	0	0	0	0	0			VIS	7	2	0	0	0	0	0	0	0	0	9		VISC	0	0	#DIV/0!	#DIV/0!	#DIV/0!	#DIV/0!	#DIV/0!	#DIV/0!	#DIV/0!	#DIV/0!	#DIV/0!	#DIV/0!
CP	4	10	0	0	0	0	0	0	0	0	14			VISC	0	0	0	0	0	0	0	0	0	0	0		CP	0.672178	2.502	#DIV/0!	#DIV/0!	#DIV/0!	#DIV/0!	#DIV/0!	#DIV/0!	#DIV/0!	#DIV/0!	#DIV/0!	#DIV/0!
LS	0	0	0	0	0	0	0	0	0	0	0			TOTAL	41	9	0	0	0	0	0	0	0	0	50		LS	0	0	#DIV/0!	#DIV/0!	#DIV/0!	#DIV/0!	#DIV/0!	#DIV/0!	#DIV/0!	#DIV/0!	#DIV/0!	#DIV/0!
sAMY	0	0	0	0	0	0	0	0	0	0	0			NORMALIZE	1.38163	0.451557	#DIV/0!	#DIV/0!	#DIV/0!	#DIV/0!	#DIV/0!	#DIV/0!	#DIV/0!	#DIV/0!			sAMY	0	0	#DIV/0!	#DIV/0!	#DIV/0!	#DIV/0!	#DIV/0!	#DIV/0!	#DIV/0!	#DIV/0!	#DIV/0!	#DIV/0!
STRv	0	4	0	0	0	0	0	0	0	0	4			Striatum													STRv	0	1.96055	#DIV/0!	#DIV/0!	#DIV/0!	#DIV/0!	#DIV/0!	#DIV/0!	#DIV/0!	#DIV/0!	#DIV/0!	#DIV/0!
GP	0	0	0	0	0	0	0	0	0	0	0				4150	4151	InputMouse#	InputMouse#	InputMouse#	InputMouse#	InputMouse#	InputMouse#	InputMouse#	InputMouse#	TOTAL		GP	0	0	#DIV/0!	#DIV/0!	#DIV/0!	#DIV/0!	#DIV/0!	#DIV/0!	#DIV/0!	#DIV/0!	#DIV/0!	#DIV/0!
PALc	0	2	0	0	0	0	0	0	0	0	2			CP	4	10	0	0	0	0	0	0	0	0	14		PALc	0	4.71371	#DIV/0!	#DIV/0!	#DIV/0!	#DIV/0!	#DIV/0!	#DIV/0!	#DIV/0!	#DIV/0!	#DIV/0!	#DIV/0!
PALm	0	0	0	0	0	0	0	0	0	0	0			LS	0	0	0	0	0	0	0	0	0	0	0		PALm	0	0	#DIV/0!	#DIV/0!	#DIV/0!	#DIV/0!	#DIV/0!	#DIV/0!	#DIV/0!	#DIV/0!	#DIV/0!	#DIV/0!
PALv	0	2	0	0	0	0	0	0	0	0	2			sAMY	0	0	0	0	0	0	0	0	0	0	0		PALv	0	3.54644	#DIV/0!	#DIV/0!	#DIV/0!	#DIV/0!	#DIV/0!	#DIV/0!	#DIV/0!	#DIV/0!	#DIV/0!	#DIV/0!
LZ/ME	2	4	0	0	0	0	0	0	0	0	6			STRv	0	4	0	0	0	0	0	0	0	0	4		LZ/ME	1.02585	3.05474	#DIV/0!	#DIV/0!	#DIV/0!	#DIV/0!	#DIV/0!	#DIV/0!	#DIV/0!	#DIV/0!	#DIV/0!	#DIV/0!
MEZ	1	0	0	0	0	0	0	0	0	0	1			TOTAL	4	14	0	0	0	0	0	0	0	0	18		MEZ	0.806975	0	#DIV/0!	#DIV/0!	#DIV/0!	#DIV/0!	#DIV/0!	#DIV/0!	#DIV/0!	#DIV/0!	#DIV/0!	#DIV/0!
PVR	0	0	0	0	0	0	0	0	0	0	0			NORMALIZE	0.357323	1.86205	#DIV/0!	#DIV/0!	#DIV/0!	#DIV/0!	#DIV/0!	#DIV/0!	#DIV/0!	#DIV/0!			PVR	0	0	#DIV/0!	#DIV/0!	#DIV/0!	#DIV/0!	#DIV/0!	#DIV/0!	#DIV/0!	#DIV/0!	#DIV/0!	#DIV/0!
PVZ	0	0	0	0	0	0	0	0	0	0	0			Pallidum													PVZ	0	0	#DIV/0!	#DIV/0!	#DIV/0!	#DIV/0!	#DIV/0!	#DIV/0!	#DIV/0!	#DIV/0!	#DIV/0!	#DIV/0!
AOB-dark/ Nlot	0	0	0	0	0	0	0	0	0	0	0				4150	4151	InputMouse#	InputMouse#	InputMouse#	InputMouse#	InputMouse#	InputMouse#	InputMouse#	InputMouse#	TOTAL		AOB-dark/ Nlot	0	0	#DIV/0!	#DIV/0!	#DIV/0!	#DIV/0!	#DIV/0!	#DIV/0!	#DIV/0!	#DIV/0!	#DIV/0!	#DIV/0!
AOB-light	0	0	0	0	0	0	0	0	0	0	0			GP	0	0	0	0	0	0	0	0	0	0	0		AOB-light	0	0	#DIV/0!	#DIV/0!	#DIV/0!	#DIV/0!	#DIV/0!	#DIV/0!	#DIV/0!	#DIV/0!	#DIV/0!	#DIV/0!
AON	0	0	0	0	0	0	0	0	0	0	0			PALc	0	2	0	0	0	0	0	0	0	0	2		AON	0	0	#DIV/0!	#DIV/0!	#DIV/0!	#DIV/0!	#DIV/0!	#DIV/0!	#DIV/0!	#DIV/0!	#DIV/0!	#DIV/0!
COA	0	0	0	0	0	0	0	0	0	0	0			PALm	0	0	0	0	0	0	0	0	0	0	0		COA	0	0	#DIV/0!	#DIV/0!	#DIV/0!	#DIV/0!	#DIV/0!	#DIV/0!	#DIV/0!	#DIV/0!	#DIV/0!	#DIV/0!
MOB-dark	11	0	0	0	0	0	0	0	0	0	11			PALv	0	2	0	0	0	0	0	0	0	0	2		MOB-dark	2.77441	0	#DIV/0!	#DIV/0!	#DIV/0!	#DIV/0!	#DIV/0!	#DIV/0!	#DIV/0!	#DIV/0!	#DIV/0!	#DIV/0!
MOB-light	3	0	0	0	0	0	0	0	0	0	3			TOTAL	0	4	0	0	0	0	0	0	0	0	4		MOB-light	0.904118	0	#DIV/0!	#DIV/0!	#DIV/0!	#DIV/0!	#DIV/0!	#DIV/0!	#DIV/0!	#DIV/0!	#DIV/0!	#DIV/0!
PAA	0	0	0	0	0	0	0	0	0	0	0			NORMALIZE	0	2.13224	#DIV/0!	#DIV/0!	#DIV/0!	#DIV/0!	#DIV/0!	#DIV/0!	#DIV/0!	#DIV/0!			PAA	0	0	#DIV/0!	#DIV/0!	#DIV/0!	#DIV/0!	#DIV/0!	#DIV/0!	#DIV/0!	#DIV/0!	#DIV/0!	#DIV/0!
PIR	0	0	0	0	0	0	0	0	0	0	0			Hypothalamus													PIR	0	0	#DIV/0!	#DIV/0!	#DIV/0!	#DIV/0!	#DIV/0!	#DIV/0!	#DIV/0!	#DIV/0!	#DIV/0!	#DIV/0!
TR	0	0	0	0	0	0	0	0	0	0	0				4150	4151	InputMouse#	InputMouse#	InputMouse#	InputMouse#	InputMouse#	InputMouse#	InputMouse#	InputMouse#	TOTAL		TR	0	0	#DIV/0!	#DIV/0!	#DIV/0!	#DIV/0!	#DIV/0!	#DIV/0!	#DIV/0!	#DIV/0!	#DIV/0!	#DIV/0!
TT	1	0	0	0	0	0	0	0	0	0	1			LZ/ME	2	4	0	0	0	0	0	0	0	0	6		TT	1.28771	0	#DIV/0!	#DIV/0!	#DIV/0!	#DIV/0!	#DIV/0!	#DIV/0!	#DIV/0!	#DIV/0!	#DIV/0!	#DIV/0!
BLA	0	0	0	0	0	0	0	0	0	0	0			MEZ	1	0	0	0	0	0	0	0	0	0	1		BLA	0	0	#DIV/0!	#DIV/0!	#DIV/0!	#DIV/0!	#DIV/0!	#DIV/0!	#DIV/0!	#DIV/0!	#DIV/0!	#DIV/0!
BMA	0	0	0	0	0	0	0	0	0	0	0			PVR	0	0	0	0	0	0	0	0	0	0	0		BMA	0	0	#DIV/0!	#DIV/0!	#DIV/0!	#DIV/0!	#DIV/0!	#DIV/0!	#DIV/0!	#DIV/0!	#DIV/0!	#DIV/0!
CLA	1	0	0	0	0	0	0	0	0	0	1			PVZ	0	0	0	0	0	0	0	0	0	0	0		CLA	2.20329	0	#DIV/0!	#DIV/0!	#DIV/0!	#DIV/0!	#DIV/0!	#DIV/0!	#DIV/0!	#DIV/0!	#DIV/0!	#DIV/0!
EP	0	0	0	0	0	0	0	0	0	0	0			TOTAL	3	4	0	0	0	0	0	0	0	0	7		EP	0	0	#DIV/0!	#DIV/0!	#DIV/0!	#DIV/0!	#DIV/0!	#DIV/0!	#DIV/0!	#DIV/0!	#DIV/0!	#DIV/0!
PA	0	0	0	0	0	0	0	0	0	0	0			NORMALIZE	0.749441	1.48778	#DIV/0!	#DIV/0!	#DIV/0!	#DIV/0!	#DIV/0!	#DIV/0!	#DIV/0!	#DIV/0!			PA	0	0	#DIV/0!	#DIV/0!	#DIV/0!	#DIV/0!	#DIV/0!	#DIV/0!	#DIV/0!	#DIV/0!	#DIV/0!	#DIV/0!
DOR-pm	12	11	0	0	0	0	0	0	0	0	23			Olfactory Areas													DOR-pm	3.07682	4.19929	#DIV/0!	#DIV/0!	#DIV/0!	#DIV/0!	#DIV/0!	#DIV/0!	#DIV/0!	#DIV/0!	#DIV/0!	#DIV/0!
DOR-sm	15	14	0	0	0	0	0	0	0	0	29				4150	4151	InputMouse#	InputMouse#	InputMouse#	InputMouse#	InputMouse#	InputMouse#	InputMouse#	InputMouse#	TOTAL		DOR-sm	7.77995	10.8113	#DIV/0!	#DIV/0!	#DIV/0!	#DIV/0!	#DIV/0!	#DIV/0!	#DIV/0!	#DIV/0!	#DIV/0!	#DIV/0!
LA	0	0	0	0	0	0	0	0	0	0	0			AOB-dark/ Nlot	0	0	0	0	0	0	0	0	0	0	0		LA	0	0	#DIV/0!	#DIV/0!	#DIV/0!	#DIV/0!	#DIV/0!	#DIV/0!	#DIV/0!	#DIV/0!	#DIV/0!	#DIV/0!
MB-mot	0	1	0	0	0	0	0	0	0	0	1			AOB-light	0	0	0	0	0	0	0	0	0	0	0		MB-mot	0	0.215387	#DIV/0!	#DIV/0!	#DIV/0!	#DIV/0!	#DIV/0!	#DIV/0!	#DIV/0!	#DIV/0!	#DIV/0!	#DIV/0!
MB-sen	2	1	0	0	0	0	0	0	0	0	3			AON	0	0	0	0	0	0	0	0	0	0	0		MB-sen	0.782139	0.582259	#DIV/0!	#DIV/0!	#DIV/0!	#DIV/0!	#DIV/0!	#DIV/0!	#DIV/0!	#DIV/0!	#DIV/0!	#DIV/0!
MB-sta	0	1	0	0	0	0	0	0	0	0	1			COA	0	0	0	0	0	0	0	0	0	0	0		MB-sta	0	2.11581	#DIV/0!	#DIV/0!	#DIV/0!	#DIV/0!	#DIV/0!	#DIV/0!	#DIV/0!	#DIV/0!	#DIV/0!	#DIV/0!
ENT	3	0	0	0	0	0	0	0	0	0	3			MOB-dark	11	0	0	0	0	0	0	0	0	0	11		ENT	2.05757	0	#DIV/0!	#DIV/0!	#DIV/0!	#DIV/0!	#DIV/0!	#DIV/0!	#DIV/0!	#DIV/0!	#DIV/0!	#DIV/0!
CA123_pyramidal/DG_granule	2	1	0	0	0	0	0	0	0	0	3			MOB-light	3	0	0	0	0	0	0	0	0	0	3		CA123_pyramidal/DG_granule	1.74573	1.2996	#DIV/0!	#DIV/0!	#DIV/0!	#DIV/0!	#DIV/0!	#DIV/0!	#DIV/0!	#DIV/0!	#DIV/0!	#DIV/0!
CA123 / DG	2	5	0	0	0	0	0	0	0	0	7			PAA	0	0	0	0	0	0	0	0	0	0	0		CA123 / DG	0.449906	1.67465	#DIV/0!	#DIV/0!	#DIV/0!	#DIV/0!	#DIV/0!	#DIV/0!	#DIV/0!	#DIV/0!	#DIV/0!	#DIV/0!
PAR	0	0	0	0	0	0	0	0	0	0	0			PIR	0	0	0	0	0	0	0	0	0	0	0		PAR	0	0	#DIV/0!	#DIV/0!	#DIV/0!	#DIV/0!	#DIV/0!	#DIV/0!	#DIV/0!	#DIV/0!	#DIV/0!	#DIV/0!
POST	0	0	0	0	0	0	0	0	0	0	0			TR	0	0	0	0	0	0	0	0	0	0	0		POST	0	0	#DIV/0!	#DIV/0!	#DIV/0!	#DIV/0!	#DIV/0!	#DIV/0!	#DIV/0!	#DIV/0!	#DIV/0!	#DIV/0!
PRE	0	0	0	0	0	0	0	0	0	0	0			TT	1	0	0	0	0	0	0	0	0	0	1		PRE	0	0	#DIV/0!	#DIV/0!	#DIV/0!	#DIV/0!	#DIV/0!	#DIV/0!	#DIV/0!	#DIV/0!	#DIV/0!	#DIV/0!
SUB	10	1	0	0	0	0	0	0	0	0	11			TOTAL	15	0	0	0	0	0	0	0	0	0	15		SUB	7.31526	1.08916	#DIV/0!	#DIV/0!	#DIV/0!	#DIV/0!	#DIV/0!	#DIV/0!	#DIV/0!	#DIV/0!	#DIV/0!	#DIV/0!
CBX-granular	2	0	0	0	0	0	0	0	0	0	2			NORMALIZE	1.12867	0	#DIV/0!	#DIV/0!	#DIV/0!	#DIV/0!	#DIV/0!	#DIV/0!	#DIV/0!	#DIV/0!			CBX-granular	0.303271	0	#DIV/0!	#DIV/0!	#DIV/0!	#DIV/0!	#DIV/0!	#DIV/0!	#DIV/0!	#DIV/0!	#DIV/0!	#DIV/0!
CBX-molecular	6	0	0	0	0	0	0	0	0	0	6			Cortical Subplate													CBX-molecular	0.775877	0	#DIV/0!	#DIV/0!	#DIV/0!	#DIV/0!	#DIV/0!	#DIV/0!	#DIV/0!	#DIV/0!	#DIV/0!	#DIV/0!
DN	0	0	0	0	0	0	0	0	0	0	0				4150	4151	InputMouse#	InputMouse#	InputMouse#	InputMouse#	InputMouse#	InputMouse#	InputMouse#	InputMouse#	TOTAL		DN	0	0	#DIV/0!	#DIV/0!	#DIV/0!	#DIV/0!	#DIV/0!	#DIV/0!	#DIV/0!	#DIV/0!	#DIV/0!	#DIV/0!
P-mot	0	6	0	0	0	0	0	0	0	0	6			BLA	0	0	0	0	0	0	0	0	0	0	0		P-mot	0	4.19637	#DIV/0!	#DIV/0!	#DIV/0!	#DIV/0!	#DIV/0!	#DIV/0!	#DIV/0!	#DIV/0!	#DIV/0!	#DIV/0!
P-sat	0	3	0	0	0	0	0	0	0	0	3			BMA	0	0	0	0	0	0	0	0	0	0	0		P-sat	0	3.30366	#DIV/0!	#DIV/0!	#DIV/0!	#DIV/0!	#DIV/0!	#DIV/0!	#DIV/0!	#DIV/0!	#DIV/0!	#DIV/0!
P-sen	0	0	0	0	0	0	0	0	0	0	0			CLA	1	0	0	0	0	0	0	0	0	0	1		P-sen	0	0	#DIV/0!	#DIV/0!	#DIV/0!	#DIV/0!	#DIV/0!	#DIV/0!	#DIV/0!	#DIV/0!	#DIV/0!	#DIV/0!
MY-mot	1	1	0	0	0	0	0	0	0	0	2			EP	0	0	0	0	0	0	0	0	0	0	0		MY-mot	0.178814	0.266234	#DIV/0!	#DIV/0!	#DIV/0!	#DIV/0!	#DIV/0!	#DIV/0!	#DIV/0!	#DIV/0!	#DIV/0!	#DIV/0!
MY-sat	0	1	0	0	0	0	0	0	0	0	1			PA	0	0	0	0	0	0	0	0	0	0	0		MY-sat	0	6.24297	#DIV/0!	#DIV/0!	#DIV/0!	#DIV/0!	#DIV/0!	#DIV/0!	#DIV/0!	#DIV/0!	#DIV/0!	#DIV/0!
MY-sen	5	0	0	0	0	0	0	0	0	0	5			TOTAL	1	0	0	0	0	0	0	0	0	0	1		MY-sen	2.37379	0	#DIV/0!	#DIV/0!	#DIV/0!	#DIV/0!	#DIV/0!	#DIV/0!	#DIV/0!	#DIV/0!	#DIV/0!	#DIV/0!
blue gray tracts	3	2	0	0	0	0	0	0	0	0	5			NORMALIZE	0.398329	0	#DIV/0!	#DIV/0!	#DIV/0!	#DIV/0!	#DIV/0!	#DIV/0!	#DIV/0!	#DIV/0!			blue gray tracts	0.974814	0.967594	#DIV/0!	#DIV/0!	#DIV/0!	#DIV/0!	#DIV/0!	#DIV/0!	#DIV/0!	#DIV/0!	#DIV/0!	#DIV/0!
light grey tracts	4	5	0	0	0	0	0	0	0	0	9			Thalamus													light grey tracts	0.407765	0.758896	#DIV/0!	#DIV/0!	#DIV/0!	#DIV/0!	#DIV/0!	#DIV/0!	#DIV/0!	#DIV/0!	#DIV/0!	#DIV/0!
CBX-tracts	0	0	0	0	0	0	0	0	0	0	0				4150	4151	InputMouse#	InputMouse#	InputMouse#	InputMouse#	InputMouse#	InputMouse#	InputMouse#	InputMouse#	TOTAL		CBX-tracts	0	0	#DIV/0!	#DIV/0!	#DIV/0!	#DIV/0!	#DIV/0!	#DIV/0!	#DIV/0!	#DIV/0!	#DIV/0!	#DIV/0!
CTX tracts	0	0	0	0	0	0	0	0	0	0	0			DOR-pm	12	11	0	0	0	0	0	0	0	0	23		CTX tracts	0	0	#DIV/0!	#DIV/0!	#DIV/0!	#DIV/0!	#DIV/0!	#DIV/0!	#DIV/0!	#DIV/0!	#DIV/0!	#DIV/0!
HY-tracts	1	0	0	0	0	0	0	0	0	0	1			DOR-sm	15	14	0	0	0	0	0	0	0	0	29		HY-tracts	1.34185	0	#DIV/0!	#DIV/0!	#DIV/0!	#DIV/0!	#DIV/0!	#DIV/0!	#DIV/0!	#DIV/0!	#DIV/0!	#DIV/0!
MB-tracts	0	0	0	0	0	0	0	0	0	0	0			TOTAL	27	25	0	0	0	0	0	0	0	0	52		MB-tracts	0	0	#DIV/0!	#DIV/0!	#DIV/0!	#DIV/0!	#DIV/0!	#DIV/0!	#DIV/0!	#DIV/0!	#DIV/0!	#DIV/0!
MY-tracts	0	0	0	0	0	0	0	0	0	0	0			NORMALIZE	4.63265	6.38658	#DIV/0!	#DIV/0!	#DIV/0!	#DIV/0!	#DIV/0!	#DIV/0!	#DIV/0!	#DIV/0!			MY-tracts	0	0	#DIV/0!	#DIV/0!	#DIV/0!	#DIV/0!	#DIV/0!	#DIV/0!	#DIV/0!	#DIV/0!	#DIV/0!	#DIV/0!
P-tracts	0	2	0	0	0	0	0	0	0	0	2			Midbrain													P-tracts	0	5.66517	#DIV/0!	#DIV/0!	#DIV/0!	#DIV/0!	#DIV/0!	#DIV/0!	#DIV/0!	#DIV/0!	#DIV/0!	#DIV/0!
TH-tracts	1	3	0	0	0	0	0	0	0	0	4				4150	4151	InputMouse#	InputMouse#	InputMouse#	InputMouse#	InputMouse#	InputMouse#	InputMouse#	InputMouse#	TOTAL		TH-tracts	1.79027	7.99654	#DIV/0!	#DIV/0!	#DIV/0!	#DIV/0!	#DIV/0!	#DIV/0!	#DIV/0!	#DIV/0!	#DIV/0!	#DIV/0!
ventricles	1	1	0	0	0	0	0	0	0	0	2			LA	0	0	0	0	0	0	0	0	0	0	0		ventricles	#VALUE!	#VALUE!	#DIV/0!	#DIV/0!	#DIV/0!	#DIV/0!	#DIV/0!	#DIV/0!	#DIV/0!	#DIV/0!	#VALUE!	#VALUE!
TOTAL	134	90	0	0	0	0	0	0	0	0	224			MB-mot	0	1	0	0	0	0	0	0	0	0	1
														MB-sen	2	1	0	0	0	0	0	0	0	0	3
														MB-sta	0	1	0	0	0	0	0	0	0	0	1
														TOTAL	2	3	0	0	0	0	0	0	0	0	5		Region	ACA	AI	ECT	FRP	GU	ILA2/3	MO	ORB	PL	PTLp	RSP	SS	VIS	VISC	CP	LS	sAMY	STRv	GP	PALc	PALm	PALv
														NORMALIZE	0.194194	0.4337	#DIV/0!	#DIV/0!	#DIV/0!	#DIV/0!	#DIV/0!	#DIV/0!	#DIV/0!	#DIV/0!			4150	0	10.7744	0	0	4.90213	0	0.125208	0	7.26495	10.5235	0	1.55905	1.61202	0	0.672178	0	0	0	0	0	0	0
														Hippocampal Formation													4151	0	0	0	0	0	0	0.37284	1.32102	0	0	0.570062	0.357116	0.685748	0	2.502	0	0	1.96055	0	4.71371	0	3.54644
															4150	4151	InputMouse#	InputMouse#	InputMouse#	InputMouse#	InputMouse#	InputMouse#	InputMouse#	InputMouse#	TOTAL		InputMouse#	#DIV/0!	#DIV/0!	#DIV/0!	#DIV/0!	#DIV/0!	#DIV/0!	#DIV/0!	#DIV/0!	#DIV/0!	#DIV/0!	#DIV/0!	#DIV/0!	#DIV/0!	#DIV/0!	#DIV/0!	#DIV/0!	#DIV/0!	#DIV/0!	#DIV/0!	#DIV/0!	#DIV/0!	#DIV/0!
														ENT	3	0	0	0	0	0	0	0	0	0	3		InputMouse#	#DIV/0!	#DIV/0!	#DIV/0!	#DIV/0!	#DIV/0!	#DIV/0!	#DIV/0!	#DIV/0!	#DIV/0!	#DIV/0!	#DIV/0!	#DIV/0!	#DIV/0!	#DIV/0!	#DIV/0!	#DIV/0!	#DIV/0!	#DIV/0!	#DIV/0!	#DIV/0!	#DIV/0!	#DIV/0!
														CA123_pyramidal/DG_granule	2	1	0	0	0	0	0	0	0	0	3		InputMouse#	#DIV/0!	#DIV/0!	#DIV/0!	#DIV/0!	#DIV/0!	#DIV/0!	#DIV/0!	#DIV/0!	#DIV/0!	#DIV/0!	#DIV/0!	#DIV/0!	#DIV/0!	#DIV/0!	#DIV/0!	#DIV/0!	#DIV/0!	#DIV/0!	#DIV/0!	#DIV/0!	#DIV/0!	#DIV/0!
														CA123 / DG	2	5	0	0	0	0	0	0	0	0	7		InputMouse#	#DIV/0!	#DIV/0!	#DIV/0!	#DIV/0!	#DIV/0!	#DIV/0!	#DIV/0!	#DIV/0!	#DIV/0!	#DIV/0!	#DIV/0!	#DIV/0!	#DIV/0!	#DIV/0!	#DIV/0!	#DIV/0!	#DIV/0!	#DIV/0!	#DIV/0!	#DIV/0!	#DIV/0!	#DIV/0!
														PAR	0	0	0	0	0	0	0	0	0	0	0		InputMouse#	#DIV/0!	#DIV/0!	#DIV/0!	#DIV/0!	#DIV/0!	#DIV/0!	#DIV/0!	#DIV/0!	#DIV/0!	#DIV/0!	#DIV/0!	#DIV/0!	#DIV/0!	#DIV/0!	#DIV/0!	#DIV/0!	#DIV/0!	#DIV/0!	#DIV/0!	#DIV/0!	#DIV/0!	#DIV/0!
														POST	0	0	0	0	0	0	0	0	0	0	0		InputMouse#	#DIV/0!	#DIV/0!	#DIV/0!	#DIV/0!	#DIV/0!	#DIV/0!	#DIV/0!	#DIV/0!	#DIV/0!	#DIV/0!	#DIV/0!	#DIV/0!	#DIV/0!	#DIV/0!	#DIV/0!	#DIV/0!	#DIV/0!	#DIV/0!	#DIV/0!	#DIV/0!	#DIV/0!	#DIV/0!
														PRE	0	0	0	0	0	0	0	0	0	0	0		InputMouse#	#DIV/0!	#DIV/0!	#DIV/0!	#DIV/0!	#DIV/0!	#DIV/0!	#DIV/0!	#DIV/0!	#DIV/0!	#DIV/0!	#DIV/0!	#DIV/0!	#DIV/0!	#DIV/0!	#DIV/0!	#DIV/0!	#DIV/0!	#DIV/0!	#DIV/0!	#DIV/0!	#DIV/0!	#DIV/0!
														SUB	10	1	0	0	0	0	0	0	0	0	11		InputMouse#	#DIV/0!	#DIV/0!	#DIV/0!	#DIV/0!	#DIV/0!	#DIV/0!	#DIV/0!	#DIV/0!	#DIV/0!	#DIV/0!	#DIV/0!	#DIV/0!	#DIV/0!	#DIV/0!	#DIV/0!	#DIV/0!	#DIV/0!	#DIV/0!	#DIV/0!	#DIV/0!	#DIV/0!	#DIV/0!
														TOTAL	17	7	0	0	0	0	0	0	0	0	24
														NORMALIZE	1.86148	1.14122	#DIV/0!	#DIV/0!	#DIV/0!	#DIV/0!	#DIV/0!	#DIV/0!	#DIV/0!	#DIV/0!
														Cerebellum
															4150	4151	InputMouse#	InputMouse#	InputMouse#	InputMouse#	InputMouse#	InputMouse#	InputMouse#	InputMouse#	TOTAL
														CBX-granular	2	0	0	0	0	0	0	0	0	0	2
														CBX-molecular	6	0	0	0	0	0	0	0	0	0	6
														DN	0	0	0	0	0	0	0	0	0	0	0
														TOTAL	8	0	0	0	0	0	0	0	0	0	8
														NORMALIZE	1.03587	0	#DIV/0!	#DIV/0!	#DIV/0!	#DIV/0!	#DIV/0!	#DIV/0!	#DIV/0!	#DIV/0!
														Pons
															4150	4151	InputMouse#	InputMouse#	InputMouse#	InputMouse#	InputMouse#	InputMouse#	InputMouse#	InputMouse#	TOTAL
														P-mot	0	6	0	0	0	0	0	0	0	0	6
														P-sat	0	3	0	0	0	0	0	0	0	0	3
														P-sen	0	0	0	0	0	0	0	0	0	0	0
														TOTAL	0	9	0	0	0	0	0	0	0	0	9
														NORMALIZE	0	2.96261	#DIV/0!	#DIV/0!	#DIV/0!	#DIV/0!	#DIV/0!	#DIV/0!	#DIV/0!	#DIV/0!
														Medulla
															4150	4151	InputMouse#	InputMouse#	InputMouse#	InputMouse#	InputMouse#	InputMouse#	InputMouse#	InputMouse#	TOTAL
														MY-mot	1	1	0	0	0	0	0	0	0	0	2
														MY-sat	0	1	0	0	0	0	0	0	0	0	1
														MY-sen	5	0	0	0	0	0	0	0	0	0	5
														TOTAL	6	2	0	0	0	0	0	0	0	0	8
														NORMALIZE	0.755932	0.375166	#DIV/0!	#DIV/0!	#DIV/0!	#DIV/0!	#DIV/0!	#DIV/0!	#DIV/0!	#DIV/0!
														Tracts
															4150	4151	InputMouse#	InputMouse#	InputMouse#	InputMouse#	InputMouse#	InputMouse#	InputMouse#	InputMouse#	TOTAL
														blue gray tracts	3	2	0	0	0	0	0	0	0	0	5
														light grey tracts	4	5	0	0	0	0	0	0	0	0	9
														CBX-tracts	0	0	0	0	0	0	0	0	0	0	0
														CTX tracts	0	0	0	0	0	0	0	0	0	0	0
														HY-tracts	1	0	0	0	0	0	0	0	0	0	1
														MB-tracts	0	0	0	0	0	0	0	0	0	0	0
														MY-tracts	0	0	0	0	0	0	0	0	0	0	0
														P-tracts	0	2	0	0	0	0	0	0	0	0	2
														TH-tracts	1	3	0	0	0	0	0	0	0	0	4
														ventricles	1	1	0	0	0	0	0	0	0	0	2
														TOTAL	10	13	0	0	0	0	0	0	0	0	23
														NORMALIZE	0.556655	1.07744	#DIV/0!	#DIV/0!	#DIV/0!	#DIV/0!	#DIV/0!	#DIV/0!	#DIV/0!	#DIV/0!
															0.0576344	0.0697613
[truncated: 51 more columns]

## Sheet: CEP Totals
Region	4157	InputMouse#	InputMouse#	InputMouse#	InputMouse#	InputMouse#	InputMouse#	InputMouse#	InputMouse#	InputMouse#	TOTAL			Isocortex												NORMALIZE	Region	4157	InputMouse#	InputMouse#	InputMouse#	InputMouse#	InputMouse#	InputMouse#	InputMouse#	InputMouse#	InputMouse#	AVERAGE	SD
ACA	0	0	0	0	0	0	0	0	0	0	0				4157	InputMouse#	InputMouse#	InputMouse#	InputMouse#	InputMouse#	InputMouse#	InputMouse#	InputMouse#	InputMouse#	TOTAL		ACA	0	#DIV/0!	#DIV/0!	#DIV/0!	#DIV/0!	#DIV/0!	#DIV/0!	#DIV/0!	#DIV/0!	#DIV/0!	#DIV/0!	#DIV/0!
AI	0	0	0	0	0	0	0	0	0	0	0			ACA	0	0	0	0	0	0	0	0	0	0	0		AI	0	#DIV/0!	#DIV/0!	#DIV/0!	#DIV/0!	#DIV/0!	#DIV/0!	#DIV/0!	#DIV/0!	#DIV/0!	#DIV/0!	#DIV/0!
ECT	0	0	0	0	0	0	0	0	0	0	0			AI	0	0	0	0	0	0	0	0	0	0	0		ECT	0	#DIV/0!	#DIV/0!	#DIV/0!	#DIV/0!	#DIV/0!	#DIV/0!	#DIV/0!	#DIV/0!	#DIV/0!	#DIV/0!	#DIV/0!
FRP	0	0	0	0	0	0	0	0	0	0	0			ECT	0	0	0	0	0	0	0	0	0	0	0		FRP	0	#DIV/0!	#DIV/0!	#DIV/0!	#DIV/0!	#DIV/0!	#DIV/0!	#DIV/0!	#DIV/0!	#DIV/0!	#DIV/0!	#DIV/0!
GU	0	0	0	0	0	0	0	0	0	0	0			FRP	0	0	0	0	0	0	0	0	0	0	0		GU	0	#DIV/0!	#DIV/0!	#DIV/0!	#DIV/0!	#DIV/0!	#DIV/0!	#DIV/0!	#DIV/0!	#DIV/0!	#DIV/0!	#DIV/0!
ILA2/3	0	0	0	0	0	0	0	0	0	0	0			GU	0	0	0	0	0	0	0	0	0	0	0		ILA2/3	0	#DIV/0!	#DIV/0!	#DIV/0!	#DIV/0!	#DIV/0!	#DIV/0!	#DIV/0!	#DIV/0!	#DIV/0!	#DIV/0!	#DIV/0!
MO	66	0	0	0	0	0	0	0	0	0	66			ILA2/3	0	0	0	0	0	0	0	0	0	0	0		MO	4.48314	#DIV/0!	#DIV/0!	#DIV/0!	#DIV/0!	#DIV/0!	#DIV/0!	#DIV/0!	#DIV/0!	#DIV/0!	#DIV/0!	#DIV/0!
ORB	1	0	0	0	0	0	0	0	0	0	1			MO	66	0	0	0	0	0	0	0	0	0	66		ORB	0.240671	#DIV/0!	#DIV/0!	#DIV/0!	#DIV/0!	#DIV/0!	#DIV/0!	#DIV/0!	#DIV/0!	#DIV/0!	#DIV/0!	#DIV/0!
PL	0	0	0	0	0	0	0	0	0	0	0			ORB	1	0	0	0	0	0	0	0	0	0	1		PL	0	#DIV/0!	#DIV/0!	#DIV/0!	#DIV/0!	#DIV/0!	#DIV/0!	#DIV/0!	#DIV/0!	#DIV/0!	#DIV/0!	#DIV/0!
PTLp	1	0	0	0	0	0	0	0	0	0	1			PL	0	0	0	0	0	0	0	0	0	0	0		PTLp	1.14182	#DIV/0!	#DIV/0!	#DIV/0!	#DIV/0!	#DIV/0!	#DIV/0!	#DIV/0!	#DIV/0!	#DIV/0!	#DIV/0!	#DIV/0!
RSP	16	0	0	0	0	0	0	0	0	0	16			PTLp	1	0	0	0	0	0	0	0	0	0	1		RSP	3.32344	#DIV/0!	#DIV/0!	#DIV/0!	#DIV/0!	#DIV/0!	#DIV/0!	#DIV/0!	#DIV/0!	#DIV/0!	#DIV/0!	#DIV/0!
SS	27	0	0	0	0	0	0	0	0	0	27			RSP	16	0	0	0	0	0	0	0	0	0	16		SS	1.75667	#DIV/0!	#DIV/0!	#DIV/0!	#DIV/0!	#DIV/0!	#DIV/0!	#DIV/0!	#DIV/0!	#DIV/0!	#DIV/0!	#DIV/0!
VIS	20	0	0	0	0	0	0	0	0	0	20			SS	27	0	0	0	0	0	0	0	0	0	27		VIS	2.49868	#DIV/0!	#DIV/0!	#DIV/0!	#DIV/0!	#DIV/0!	#DIV/0!	#DIV/0!	#DIV/0!	#DIV/0!	#DIV/0!	#DIV/0!
VISC	1	0	0	0	0	0	0	0	0	0	1			VIS	20	0	0	0	0	0	0	0	0	0	20		VISC	1.53445	#DIV/0!	#DIV/0!	#DIV/0!	#DIV/0!	#DIV/0!	#DIV/0!	#DIV/0!	#DIV/0!	#DIV/0!	#DIV/0!	#DIV/0!
CP	3	0	0	0	0	0	0	0	0	0	3			VISC	1	0	0	0	0	0	0	0	0	0	1		CP	0.273498	#DIV/0!	#DIV/0!	#DIV/0!	#DIV/0!	#DIV/0!	#DIV/0!	#DIV/0!	#DIV/0!	#DIV/0!	#DIV/0!	#DIV/0!
LS	1	0	0	0	0	0	0	0	0	0	1			TOTAL	132	0	0	0	0	0	0	0	0	0	132		LS	0.48074	#DIV/0!	#DIV/0!	#DIV/0!	#DIV/0!	#DIV/0!	#DIV/0!	#DIV/0!	#DIV/0!	#DIV/0!	#DIV/0!	#DIV/0!
sAMY	0	0	0	0	0	0	0	0	0	0	0			NORMALIZE	2.41318	#DIV/0!	#DIV/0!	#DIV/0!	#DIV/0!	#DIV/0!	#DIV/0!	#DIV/0!	#DIV/0!	#DIV/0!			sAMY	0	#DIV/0!	#DIV/0!	#DIV/0!	#DIV/0!	#DIV/0!	#DIV/0!	#DIV/0!	#DIV/0!	#DIV/0!	#DIV/0!	#DIV/0!
STRv	4	0	0	0	0	0	0	0	0	0	4			Striatum													STRv	0.71437	#DIV/0!	#DIV/0!	#DIV/0!	#DIV/0!	#DIV/0!	#DIV/0!	#DIV/0!	#DIV/0!	#DIV/0!	#DIV/0!	#DIV/0!
GP	2	0	0	0	0	0	0	0	0	0	2				4157	InputMouse#	InputMouse#	InputMouse#	InputMouse#	InputMouse#	InputMouse#	InputMouse#	InputMouse#	InputMouse#	TOTAL		GP	1.87569	#DIV/0!	#DIV/0!	#DIV/0!	#DIV/0!	#DIV/0!	#DIV/0!	#DIV/0!	#DIV/0!	#DIV/0!	#DIV/0!	#DIV/0!
PALc	0	0	0	0	0	0	0	0	0	0	0			CP	3	0	0	0	0	0	0	0	0	0	3		PALc	0	#DIV/0!	#DIV/0!	#DIV/0!	#DIV/0!	#DIV/0!	#DIV/0!	#DIV/0!	#DIV/0!	#DIV/0!	#DIV/0!	#DIV/0!
PALm	0	0	0	0	0	0	0	0	0	0	0			LS	1	0	0	0	0	0	0	0	0	0	1		PALm	0	#DIV/0!	#DIV/0!	#DIV/0!	#DIV/0!	#DIV/0!	#DIV/0!	#DIV/0!	#DIV/0!	#DIV/0!	#DIV/0!	#DIV/0!
PALv	1	0	0	0	0	0	0	0	0	0	1			sAMY	0	0	0	0	0	0	0	0	0	0	0		PALv	0.646112	#DIV/0!	#DIV/0!	#DIV/0!	#DIV/0!	#DIV/0!	#DIV/0!	#DIV/0!	#DIV/0!	#DIV/0!	#DIV/0!	#DIV/0!
LZ/ME	0	0	0	0	0	0	0	0	0	0	0			STRv	4	0	0	0	0	0	0	0	0	0	4		LZ/ME	0	#DIV/0!	#DIV/0!	#DIV/0!	#DIV/0!	#DIV/0!	#DIV/0!	#DIV/0!	#DIV/0!	#DIV/0!	#DIV/0!	#DIV/0!
MEZ	0	0	0	0	0	0	0	0	0	0	0			TOTAL	8	0	0	0	0	0	0	0	0	0	8		MEZ	0	#DIV/0!	#DIV/0!	#DIV/0!	#DIV/0!	#DIV/0!	#DIV/0!	#DIV/0!	#DIV/0!	#DIV/0!	#DIV/0!	#DIV/0!
PVR	0	0	0	0	0	0	0	0	0	0	0			NORMALIZE	0.387702	#DIV/0!	#DIV/0!	#DIV/0!	#DIV/0!	#DIV/0!	#DIV/0!	#DIV/0!	#DIV/0!	#DIV/0!			PVR	0	#DIV/0!	#DIV/0!	#DIV/0!	#DIV/0!	#DIV/0!	#DIV/0!	#DIV/0!	#DIV/0!	#DIV/0!	#DIV/0!	#DIV/0!
PVZ	0	0	0	0	0	0	0	0	0	0	0			Pallidum													PVZ	0	#DIV/0!	#DIV/0!	#DIV/0!	#DIV/0!	#DIV/0!	#DIV/0!	#DIV/0!	#DIV/0!	#DIV/0!	#DIV/0!	#DIV/0!
AOB-dark/ Nlot	1	0	0	0	0	0	0	0	0	0	1				4157	InputMouse#	InputMouse#	InputMouse#	InputMouse#	InputMouse#	InputMouse#	InputMouse#	InputMouse#	InputMouse#	TOTAL		AOB-dark/ Nlot	2.57955	#DIV/0!	#DIV/0!	#DIV/0!	#DIV/0!	#DIV/0!	#DIV/0!	#DIV/0!	#DIV/0!	#DIV/0!	#DIV/0!	#DIV/0!
AOB-light	0	0	0	0	0	0	0	0	0	0	0			GP	2	0	0	0	0	0	0	0	0	0	2		AOB-light	0	#DIV/0!	#DIV/0!	#DIV/0!	#DIV/0!	#DIV/0!	#DIV/0!	#DIV/0!	#DIV/0!	#DIV/0!	#DIV/0!	#DIV/0!
AON	0	0	0	0	0	0	0	0	0	0	0			PALc	0	0	0	0	0	0	0	0	0	0	0		AON	0	#DIV/0!	#DIV/0!	#DIV/0!	#DIV/0!	#DIV/0!	#DIV/0!	#DIV/0!	#DIV/0!	#DIV/0!	#DIV/0!	#DIV/0!
COA	0	0	0	0	0	0	0	0	0	0	0			PALm	0	0	0	0	0	0	0	0	0	0	0		COA	0	#DIV/0!	#DIV/0!	#DIV/0!	#DIV/0!	#DIV/0!	#DIV/0!	#DIV/0!	#DIV/0!	#DIV/0!	#DIV/0!	#DIV/0!
MOB-dark	3	0	0	0	0	0	0	0	0	0	3			PALv	1	0	0	0	0	0	0	0	0	0	1		MOB-dark	0.410494	#DIV/0!	#DIV/0!	#DIV/0!	#DIV/0!	#DIV/0!	#DIV/0!	#DIV/0!	#DIV/0!	#DIV/0!	#DIV/0!	#DIV/0!
MOB-light	8	0	0	0	0	0	0	0	0	0	8			TOTAL	3	0	0	0	0	0	0	0	0	0	3		MOB-light	1.30798	#DIV/0!	#DIV/0!	#DIV/0!	#DIV/0!	#DIV/0!	#DIV/0!	#DIV/0!	#DIV/0!	#DIV/0!	#DIV/0!	#DIV/0!
PAA	0	0	0	0	0	0	0	0	0	0	0			NORMALIZE	0.582698	#DIV/0!	#DIV/0!	#DIV/0!	#DIV/0!	#DIV/0!	#DIV/0!	#DIV/0!	#DIV/0!	#DIV/0!			PAA	0	#DIV/0!	#DIV/0!	#DIV/0!	#DIV/0!	#DIV/0!	#DIV/0!	#DIV/0!	#DIV/0!	#DIV/0!	#DIV/0!	#DIV/0!
PIR	4	0	0	0	0	0	0	0	0	0	4			Hypothalamus													PIR	0.932306	#DIV/0!	#DIV/0!	#DIV/0!	#DIV/0!	#DIV/0!	#DIV/0!	#DIV/0!	#DIV/0!	#DIV/0!	#DIV/0!	#DIV/0!
TR	0	0	0	0	0	0	0	0	0	0	0				4157	InputMouse#	InputMouse#	InputMouse#	InputMouse#	InputMouse#	InputMouse#	InputMouse#	InputMouse#	InputMouse#	TOTAL		TR	0	#DIV/0!	#DIV/0!	#DIV/0!	#DIV/0!	#DIV/0!	#DIV/0!	#DIV/0!	#DIV/0!	#DIV/0!	#DIV/0!	#DIV/0!
TT	0	0	0	0	0	0	0	0	0	0	0			LZ/ME	0	0	0	0	0	0	0	0	0	0	0		TT	0	#DIV/0!	#DIV/0!	#DIV/0!	#DIV/0!	#DIV/0!	#DIV/0!	#DIV/0!	#DIV/0!	#DIV/0!	#DIV/0!	#DIV/0!
BLA	0	0	0	0	0	0	0	0	0	0	0			MEZ	0	0	0	0	0	0	0	0	0	0	0		BLA	0	#DIV/0!	#DIV/0!	#DIV/0!	#DIV/0!	#DIV/0!	#DIV/0!	#DIV/0!	#DIV/0!	#DIV/0!	#DIV/0!	#DIV/0!
BMA	0	0	0	0	0	0	0	0	0	0	0			PVR	0	0	0	0	0	0	0	0	0	0	0		BMA	0	#DIV/0!	#DIV/0!	#DIV/0!	#DIV/0!	#DIV/0!	#DIV/0!	#DIV/0!	#DIV/0!	#DIV/0!	#DIV/0!	#DIV/0!
CLA	0	0	0	0	0	0	0	0	0	0	0			PVZ	0	0	0	0	0	0	0	0	0	0	0		CLA	0	#DIV/0!	#DIV/0!	#DIV/0!	#DIV/0!	#DIV/0!	#DIV/0!	#DIV/0!	#DIV/0!	#DIV/0!	#DIV/0!	#DIV/0!
EP	0	0	0	0	0	0	0	0	0	0	0			TOTAL	0	0	0	0	0	0	0	0	0	0	0		EP	0	#DIV/0!	#DIV/0!	#DIV/0!	#DIV/0!	#DIV/0!	#DIV/0!	#DIV/0!	#DIV/0!	#DIV/0!	#DIV/0!	#DIV/0!
PA	0	0	0	0	0	0	0	0	0	0	0			NORMALIZE	0	#DIV/0!	#DIV/0!	#DIV/0!	#DIV/0!	#DIV/0!	#DIV/0!	#DIV/0!	#DIV/0!	#DIV/0!			PA	0	#DIV/0!	#DIV/0!	#DIV/0!	#DIV/0!	#DIV/0!	#DIV/0!	#DIV/0!	#DIV/0!	#DIV/0!	#DIV/0!	#DIV/0!
DOR-pm	9	0	0	0	0	0	0	0	0	0	9			Olfactory Areas													DOR-pm	1.25191	#DIV/0!	#DIV/0!	#DIV/0!	#DIV/0!	#DIV/0!	#DIV/0!	#DIV/0!	#DIV/0!	#DIV/0!	#DIV/0!	#DIV/0!
DOR-sm	4	0	0	0	0	0	0	0	0	0	4				4157	InputMouse#	InputMouse#	InputMouse#	InputMouse#	InputMouse#	InputMouse#	InputMouse#	InputMouse#	InputMouse#	TOTAL		DOR-sm	1.12552	#DIV/0!	#DIV/0!	#DIV/0!	#DIV/0!	#DIV/0!	#DIV/0!	#DIV/0!	#DIV/0!	#DIV/0!	#DIV/0!	#DIV/0!
LA	0	0	0	0	0	0	0	0	0	0	0			AOB-dark/ Nlot	1	0	0	0	0	0	0	0	0	0	1		LA	0	#DIV/0!	#DIV/0!	#DIV/0!	#DIV/0!	#DIV/0!	#DIV/0!	#DIV/0!	#DIV/0!	#DIV/0!	#DIV/0!	#DIV/0!
MB-mot	7	0	0	0	0	0	0	0	0	0	7			AOB-light	0	0	0	0	0	0	0	0	0	0	0		MB-mot	0.549368	#DIV/0!	#DIV/0!	#DIV/0!	#DIV/0!	#DIV/0!	#DIV/0!	#DIV/0!	#DIV/0!	#DIV/0!	#DIV/0!	#DIV/0!
MB-sen	5	0	0	0	0	0	0	0	0	0	5			AON	0	0	0	0	0	0	0	0	0	0	0		MB-sen	1.0608	#DIV/0!	#DIV/0!	#DIV/0!	#DIV/0!	#DIV/0!	#DIV/0!	#DIV/0!	#DIV/0!	#DIV/0!	#DIV/0!	#DIV/0!
MB-sta	2	0	0	0	0	0	0	0	0	0	2			COA	0	0	0	0	0	0	0	0	0	0	0		MB-sta	1.54189	#DIV/0!	#DIV/0!	#DIV/0!	#DIV/0!	#DIV/0!	#DIV/0!	#DIV/0!	#DIV/0!	#DIV/0!	#DIV/0!	#DIV/0!
ENT	3	0	0	0	0	0	0	0	0	0	3			MOB-dark	3	0	0	0	0	0	0	0	0	0	3		ENT	1.11625	#DIV/0!	#DIV/0!	#DIV/0!	#DIV/0!	#DIV/0!	#DIV/0!	#DIV/0!	#DIV/0!	#DIV/0!	#DIV/0!	#DIV/0!
CA123_pyramidal/DG_granule	0	0	0	0	0	0	0	0	0	0	0			MOB-light	8	0	0	0	0	0	0	0	0	0	8		CA123_pyramidal/DG_granule	0	#DIV/0!	#DIV/0!	#DIV/0!	#DIV/0!	#DIV/0!	#DIV/0!	#DIV/0!	#DIV/0!	#DIV/0!	#DIV/0!	#DIV/0!
CA123 / DG	2	0	0	0	0	0	0	0	0	0	2			PAA	0	0	0	0	0	0	0	0	0	0	0		CA123 / DG	0.244079	#DIV/0!	#DIV/0!	#DIV/0!	#DIV/0!	#DIV/0!	#DIV/0!	#DIV/0!	#DIV/0!	#DIV/0!	#DIV/0!	#DIV/0!
PAR	3	0	0	0	0	0	0	0	0	0	3			PIR	4	0	0	0	0	0	0	0	0	0	4		PAR	8.47814	#DIV/0!	#DIV/0!	#DIV/0!	#DIV/0!	#DIV/0!	#DIV/0!	#DIV/0!	#DIV/0!	#DIV/0!	#DIV/0!	#DIV/0!
POST	1	0	0	0	0	0	0	0	0	0	1			TR	0	0	0	0	0	0	0	0	0	0	0		POST	2.14935	#DIV/0!	#DIV/0!	#DIV/0!	#DIV/0!	#DIV/0!	#DIV/0!	#DIV/0!	#DIV/0!	#DIV/0!	#DIV/0!	#DIV/0!
PRE	1	0	0	0	0	0	0	0	0	0	1			TT	0	0	0	0	0	0	0	0	0	0	0		PRE	1.99439	#DIV/0!	#DIV/0!	#DIV/0!	#DIV/0!	#DIV/0!	#DIV/0!	#DIV/0!	#DIV/0!	#DIV/0!	#DIV/0!	#DIV/0!
SUB	5	0	0	0	0	0	0	0	0	0	5			TOTAL	16	0	0	0	0	0	0	0	0	0	16		SUB	1.9843	#DIV/0!	#DIV/0!	#DIV/0!	#DIV/0!	#DIV/0!	#DIV/0!	#DIV/0!	#DIV/0!	#DIV/0!	#DIV/0!	#DIV/0!
CBX-granular	7	0	0	0	0	0	0	0	0	0	7			NORMALIZE	0.653136	#DIV/0!	#DIV/0!	#DIV/0!	#DIV/0!	#DIV/0!	#DIV/0!	#DIV/0!	#DIV/0!	#DIV/0!			CBX-granular	0.575846	#DIV/0!	#DIV/0!	#DIV/0!	#DIV/0!	#DIV/0!	#DIV/0!	#DIV/0!	#DIV/0!	#DIV/0!	#DIV/0!	#DIV/0!
CBX-molecular	3	0	0	0	0	0	0	0	0	0	3			Cortical Subplate													CBX-molecular	0.210461	#DIV/0!	#DIV/0!	#DIV/0!	#DIV/0!	#DIV/0!	#DIV/0!	#DIV/0!	#DIV/0!	#DIV/0!	#DIV/0!	#DIV/0!
DN	3	0	0	0	0	0	0	0	0	0	3				4157	InputMouse#	InputMouse#	InputMouse#	InputMouse#	InputMouse#	InputMouse#	InputMouse#	InputMouse#	InputMouse#	TOTAL		DN	3.11922	#DIV/0!	#DIV/0!	#DIV/0!	#DIV/0!	#DIV/0!	#DIV/0!	#DIV/0!	#DIV/0!	#DIV/0!	#DIV/0!	#DIV/0!
P-mot	3	0	0	0	0	0	0	0	0	0	3			BLA	0	0	0	0	0	0	0	0	0	0	0		P-mot	0.764521	#DIV/0!	#DIV/0!	#DIV/0!	#DIV/0!	#DIV/0!	#DIV/0!	#DIV/0!	#DIV/0!	#DIV/0!	#DIV/0!	#DIV/0!
P-sat	7	0	0	0	0	0	0	0	0	0	7			BMA	0	0	0	0	0	0	0	0	0	0	0		P-sat	2.80878	#DIV/0!	#DIV/0!	#DIV/0!	#DIV/0!	#DIV/0!	#DIV/0!	#DIV/0!	#DIV/0!	#DIV/0!	#DIV/0!	#DIV/0!
P-sen	0	0	0	0	0	0	0	0	0	0	0			CLA	0	0	0	0	0	0	0	0	0	0	0		P-sen	0	#DIV/0!	#DIV/0!	#DIV/0!	#DIV/0!	#DIV/0!	#DIV/0!	#DIV/0!	#DIV/0!	#DIV/0!	#DIV/0!	#DIV/0!
MY-mot	2	0	0	0	0	0	0	0	0	0	2			EP	0	0	0	0	0	0	0	0	0	0	0		MY-mot	0.194017	#DIV/0!	#DIV/0!	#DIV/0!	#DIV/0!	#DIV/0!	#DIV/0!	#DIV/0!	#DIV/0!	#DIV/0!	#DIV/0!	#DIV/0!
MY-sat	0	0	0	0	0	0	0	0	0	0	0			PA	0	0	0	0	0	0	0	0	0	0	0		MY-sat	0	#DIV/0!	#DIV/0!	#DIV/0!	#DIV/0!	#DIV/0!	#DIV/0!	#DIV/0!	#DIV/0!	#DIV/0!	#DIV/0!	#DIV/0!
MY-sen	1	0	0	0	0	0	0	0	0	0	1			TOTAL	0	0	0	0	0	0	0	0	0	0	0		MY-sen	0.257561	#DIV/0!	#DIV/0!	#DIV/0!	#DIV/0!	#DIV/0!	#DIV/0!	#DIV/0!	#DIV/0!	#DIV/0!	#DIV/0!	#DIV/0!
blue gray tracts	1	0	0	0	0	0	0	0	0	0	1			NORMALIZE	0	#DIV/0!	#DIV/0!	#DIV/0!	#DIV/0!	#DIV/0!	#DIV/0!	#DIV/0!	#DIV/0!	#DIV/0!			blue gray tracts	0.176282	#DIV/0!	#DIV/0!	#DIV/0!	#DIV/0!	#DIV/0!	#DIV/0!	#DIV/0!	#DIV/0!	#DIV/0!	#DIV/0!	#DIV/0!
light grey tracts	12	0	0	0	0	0	0	0	0	0	12			Thalamus													light grey tracts	0.66365	#DIV/0!	#DIV/0!	#DIV/0!	#DIV/0!	#DIV/0!	#DIV/0!	#DIV/0!	#DIV/0!	#DIV/0!	#DIV/0!	#DIV/0!
CBX-tracts	0	0	0	0	0	0	0	0	0	0	0				4157	InputMouse#	InputMouse#	InputMouse#	InputMouse#	InputMouse#	InputMouse#	InputMouse#	InputMouse#	InputMouse#	TOTAL		CBX-tracts	0	#DIV/0!	#DIV/0!	#DIV/0!	#DIV/0!	#DIV/0!	#DIV/0!	#DIV/0!	#DIV/0!	#DIV/0!	#DIV/0!	#DIV/0!
CTX tracts	0	0	0	0	0	0	0	0	0	0	0			DOR-pm	9	0	0	0	0	0	0	0	0	0	9		CTX tracts	0	#DIV/0!	#DIV/0!	#DIV/0!	#DIV/0!	#DIV/0!	#DIV/0!	#DIV/0!	#DIV/0!	#DIV/0!	#DIV/0!	#DIV/0!
HY-tracts	0	0	0	0	0	0	0	0	0	0	0			DOR-sm	4	0	0	0	0	0	0	0	0	0	4		HY-tracts	0	#DIV/0!	#DIV/0!	#DIV/0!	#DIV/0!	#DIV/0!	#DIV/0!	#DIV/0!	#DIV/0!	#DIV/0!	#DIV/0!	#DIV/0!
MB-tracts	5	0	0	0	0	0	0	0	0	0	5			TOTAL	13	0	0	0	0	0	0	0	0	0	13		MB-tracts	2.29669	#DIV/0!	#DIV/0!	#DIV/0!	#DIV/0!	#DIV/0!	#DIV/0!	#DIV/0!	#DIV/0!	#DIV/0!	#DIV/0!	#DIV/0!
MY-tracts	0	0	0	0	0	0	0	0	0	0	0			NORMALIZE	1.21009	#DIV/0!	#DIV/0!	#DIV/0!	#DIV/0!	#DIV/0!	#DIV/0!	#DIV/0!	#DIV/0!	#DIV/0!			MY-tracts	0	#DIV/0!	#DIV/0!	#DIV/0!	#DIV/0!	#DIV/0!	#DIV/0!	#DIV/0!	#DIV/0!	#DIV/0!	#DIV/0!	#DIV/0!
P-tracts	0	0	0	0	0	0	0	0	0	0	0			Midbrain													P-tracts	0	#DIV/0!	#DIV/0!	#DIV/0!	#DIV/0!	#DIV/0!	#DIV/0!	#DIV/0!	#DIV/0!	#DIV/0!	#DIV/0!	#DIV/0!
TH-tracts	1	0	0	0	0	0	0	0	0	0	1				4157	InputMouse#	InputMouse#	InputMouse#	InputMouse#	InputMouse#	InputMouse#	InputMouse#	InputMouse#	InputMouse#	TOTAL		TH-tracts	0.97124	#DIV/0!	#DIV/0!	#DIV/0!	#DIV/0!	#DIV/0!	#DIV/0!	#DIV/0!	#DIV/0!	#DIV/0!	#DIV/0!	#DIV/0!
ventricles	1	0	0	0	0	0	0	0	0	0	1			LA	0	0	0	0	0	0	0	0	0	0	0		ventricles	#VALUE!	#DIV/0!	#DIV/0!	#DIV/0!	#DIV/0!	#DIV/0!	#DIV/0!	#DIV/0!	#DIV/0!	#DIV/0!	#VALUE!	#VALUE!
TOTAL	247	0	0	0	0	0	0	0	0	0	247			MB-mot	7	0	0	0	0	0	0	0	0	0	7
														MB-sen	5	0	0	0	0	0	0	0	0	0	5
														MB-sta	2	0	0	0	0	0	0	0	0	0	2
														TOTAL	14	0	0	0	0	0	0	0	0	0	14		Region	ACA	AI	ECT	FRP	GU	ILA2/3	MO	ORB	PL	PTLp	RSP	SS	VIS	VISC	CP	LS	sAMY	STRv	GP	PALc	PALm	PALv
														NORMALIZE	0.737466	#DIV/0!	#DIV/0!	#DIV/0!	#DIV/0!	#DIV/0!	#DIV/0!	#DIV/0!	#DIV/0!	#DIV/0!			4157	0	0	0	0	0	0	4.48314	0.240671	0	1.14182	3.32344	1.75667	2.49868	1.53445	0.273498	0.48074	0	0.71437	1.87569	0	0	0.646112
														Hippocampal Formation													InputMouse#	#DIV/0!	#DIV/0!	#DIV/0!	#DIV/0!	#DIV/0!	#DIV/0!	#DIV/0!	#DIV/0!	#DIV/0!	#DIV/0!	#DIV/0!	#DIV/0!	#DIV/0!	#DIV/0!	#DIV/0!	#DIV/0!	#DIV/0!	#DIV/0!	#DIV/0!	#DIV/0!	#DIV/0!	#DIV/0!
															4157	InputMouse#	InputMouse#	InputMouse#	InputMouse#	InputMouse#	InputMouse#	InputMouse#	InputMouse#	InputMouse#	TOTAL		InputMouse#	#DIV/0!	#DIV/0!	#DIV/0!	#DIV/0!	#DIV/0!	#DIV/0!	#DIV/0!	#DIV/0!	#DIV/0!	#DIV/0!	#DIV/0!	#DIV/0!	#DIV/0!	#DIV/0!	#DIV/0!	#DIV/0!	#DIV/0!	#DIV/0!	#DIV/0!	#DIV/0!	#DIV/0!	#DIV/0!
														ENT	3	0	0	0	0	0	0	0	0	0	3		InputMouse#	#DIV/0!	#DIV/0!	#DIV/0!	#DIV/0!	#DIV/0!	#DIV/0!	#DIV/0!	#DIV/0!	#DIV/0!	#DIV/0!	#DIV/0!	#DIV/0!	#DIV/0!	#DIV/0!	#DIV/0!	#DIV/0!	#DIV/0!	#DIV/0!	#DIV/0!	#DIV/0!	#DIV/0!	#DIV/0!
														CA123_pyramidal/DG_granule	0	0	0	0	0	0	0	0	0	0	0		InputMouse#	#DIV/0!	#DIV/0!	#DIV/0!	#DIV/0!	#DIV/0!	#DIV/0!	#DIV/0!	#DIV/0!	#DIV/0!	#DIV/0!	#DIV/0!	#DIV/0!	#DIV/0!	#DIV/0!	#DIV/0!	#DIV/0!	#DIV/0!	#DIV/0!	#DIV/0!	#DIV/0!	#DIV/0!	#DIV/0!
														CA123 / DG	2	0	0	0	0	0	0	0	0	0	2		InputMouse#	#DIV/0!	#DIV/0!	#DIV/0!	#DIV/0!	#DIV/0!	#DIV/0!	#DIV/0!	#DIV/0!	#DIV/0!	#DIV/0!	#DIV/0!	#DIV/0!	#DIV/0!	#DIV/0!	#DIV/0!	#DIV/0!	#DIV/0!	#DIV/0!	#DIV/0!	#DIV/0!	#DIV/0!	#DIV/0!
														PAR	3	0	0	0	0	0	0	0	0	0	3		InputMouse#	#DIV/0!	#DIV/0!	#DIV/0!	#DIV/0!	#DIV/0!	#DIV/0!	#DIV/0!	#DIV/0!	#DIV/0!	#DIV/0!	#DIV/0!	#DIV/0!	#DIV/0!	#DIV/0!	#DIV/0!	#DIV/0!	#DIV/0!	#DIV/0!	#DIV/0!	#DIV/0!	#DIV/0!	#DIV/0!
														POST	1	0	0	0	0	0	0	0	0	0	1		InputMouse#	#DIV/0!	#DIV/0!	#DIV/0!	#DIV/0!	#DIV/0!	#DIV/0!	#DIV/0!	#DIV/0!	#DIV/0!	#DIV/0!	#DIV/0!	#DIV/0!	#DIV/0!	#DIV/0!	#DIV/0!	#DIV/0!	#DIV/0!	#DIV/0!	#DIV/0!	#DIV/0!	#DIV/0!	#DIV/0!
														PRE	1	0	0	0	0	0	0	0	0	0	1		InputMouse#	#DIV/0!	#DIV/0!	#DIV/0!	#DIV/0!	#DIV/0!	#DIV/0!	#DIV/0!	#DIV/0!	#DIV/0!	#DIV/0!	#DIV/0!	#DIV/0!	#DIV/0!	#DIV/0!	#DIV/0!	#DIV/0!	#DIV/0!	#DIV/0!	#DIV/0!	#DIV/0!	#DIV/0!	#DIV/0!
														SUB	5	0	0	0	0	0	0	0	0	0	5		InputMouse#	#DIV/0!	#DIV/0!	#DIV/0!	#DIV/0!	#DIV/0!	#DIV/0!	#DIV/0!	#DIV/0!	#DIV/0!	#DIV/0!	#DIV/0!	#DIV/0!	#DIV/0!	#DIV/0!	#DIV/0!	#DIV/0!	#DIV/0!	#DIV/0!	#DIV/0!	#DIV/0!	#DIV/0!	#DIV/0!
														TOTAL	15	0	0	0	0	0	0	0	0	0	15
														NORMALIZE	0.891065	#DIV/0!	#DIV/0!	#DIV/0!	#DIV/0!	#DIV/0!	#DIV/0!	#DIV/0!	#DIV/0!	#DIV/0!
														Cerebellum
															4157	InputMouse#	InputMouse#	InputMouse#	InputMouse#	InputMouse#	InputMouse#	InputMouse#	InputMouse#	InputMouse#	TOTAL
														CBX-granular	7	0	0	0	0	0	0	0	0	0	7
														CBX-molecular	3	0	0	0	0	0	0	0	0	0	3
														DN	3	0	0	0	0	0	0	0	0	0	3
														TOTAL	13	0	0	0	0	0	0	0	0	0	13
														NORMALIZE	1.03781	#DIV/0!	#DIV/0!	#DIV/0!	#DIV/0!	#DIV/0!	#DIV/0!	#DIV/0!	#DIV/0!	#DIV/0!
														Pons
															4157	InputMouse#	InputMouse#	InputMouse#	InputMouse#	InputMouse#	InputMouse#	InputMouse#	InputMouse#	InputMouse#	TOTAL
														P-mot	3	0	0	0	0	0	0	0	0	0	3
														P-sat	7	0	0	0	0	0	0	0	0	0	7
														P-sen	0	0	0	0	0	0	0	0	0	0	0
														TOTAL	10	0	0	0	0	0	0	0	0	0	10
														NORMALIZE	1.19944	#DIV/0!	#DIV/0!	#DIV/0!	#DIV/0!	#DIV/0!	#DIV/0!	#DIV/0!	#DIV/0!	#DIV/0!
														Medulla
															4157	InputMouse#	InputMouse#	InputMouse#	InputMouse#	InputMouse#	InputMouse#	InputMouse#	InputMouse#	InputMouse#	TOTAL
														MY-mot	2	0	0	0	0	0	0	0	0	0	2
														MY-sat	0	0	0	0	0	0	0	0	0	0	0
														MY-sen	1	0	0	0	0	0	0	0	0	0	1
														TOTAL	3	0	0	0	0	0	0	0	0	0	3
														NORMALIZE	0.20505	#DIV/0!	#DIV/0!	#DIV/0!	#DIV/0!	#DIV/0!	#DIV/0!	#DIV/0!	#DIV/0!	#DIV/0!
														Tracts
															4157	InputMouse#	InputMouse#	InputMouse#	InputMouse#	InputMouse#	InputMouse#	InputMouse#	InputMouse#	InputMouse#	TOTAL
														blue gray tracts	1	0	0	0	0	0	0	0	0	0	1
														light grey tracts	12	0	0	0	0	0	0	0	0	0	12
														CBX-tracts	0	0	0	0	0	0	0	0	0	0	0
														CTX tracts	0	0	0	0	0	0	0	0	0	0	0
														HY-tracts	0	0	0	0	0	0	0	0	0	0	0
														MB-tracts	5	0	0	0	0	0	0	0	0	0	5
														MY-tracts	0	0	0	0	0	0	0	0	0	0	0
														P-tracts	0	0	0	0	0	0	0	0	0	0	0
														TH-tracts	1	0	0	0	0	0	0	0	0	0	1
														ventricles	1	0	0	0	0	0	0	0	0	0	1
														TOTAL	20	0	0	0	0	0	0	0	0	0	20
														NORMALIZE	0.603982	#DIV/0!	#DIV/0!	#DIV/0!	#DIV/0!	#DIV/0!	#DIV/0!	#DIV/0!	#DIV/0!	#DIV/0!
[truncated: 51 more columns]

## Sheet: Saline Totals
Region	InputMouse#	InputMouse#	InputMouse#	InputMouse#	InputMouse#	InputMouse#	InputMouse#	InputMouse#	InputMouse#	InputMouse#	TOTAL			Isocortex												NORMALIZE	Region	InputMouse#	InputMouse#	InputMouse#	InputMouse#	InputMouse#	InputMouse#	InputMouse#	InputMouse#	InputMouse#	InputMouse#	AVERAGE	SD
ACA	0	0	0	0	0	0	0	0	0	0	0				InputMouse#	InputMouse#	InputMouse#	InputMouse#	InputMouse#	InputMouse#	InputMouse#	InputMouse#	InputMouse#	InputMouse#	TOTAL		ACA	#DIV/0!	#DIV/0!	#DIV/0!	#DIV/0!	#DIV/0!	#DIV/0!	#DIV/0!	#DIV/0!	#DIV/0!	#DIV/0!	#DIV/0!	#DIV/0!
AI	0	0	0	0	0	0	0	0	0	0	0			ACA	0	0	0	0	0	0	0	0	0	0	0		AI	#DIV/0!	#DIV/0!	#DIV/0!	#DIV/0!	#DIV/0!	#DIV/0!	#DIV/0!	#DIV/0!	#DIV/0!	#DIV/0!	#DIV/0!	#DIV/0!
ECT	0	0	0	0	0	0	0	0	0	0	0			AI	0	0	0	0	0	0	0	0	0	0	0		ECT	#DIV/0!	#DIV/0!	#DIV/0!	#DIV/0!	#DIV/0!	#DIV/0!	#DIV/0!	#DIV/0!	#DIV/0!	#DIV/0!	#DIV/0!	#DIV/0!
FRP	0	0	0	0	0	0	0	0	0	0	0			ECT	0	0	0	0	0	0	0	0	0	0	0		FRP	#DIV/0!	#DIV/0!	#DIV/0!	#DIV/0!	#DIV/0!	#DIV/0!	#DIV/0!	#DIV/0!	#DIV/0!	#DIV/0!	#DIV/0!	#DIV/0!
GU	0	0	0	0	0	0	0	0	0	0	0			FRP	0	0	0	0	0	0	0	0	0	0	0		GU	#DIV/0!	#DIV/0!	#DIV/0!	#DIV/0!	#DIV/0!	#DIV/0!	#DIV/0!	#DIV/0!	#DIV/0!	#DIV/0!	#DIV/0!	#DIV/0!
ILA2/3	0	0	0	0	0	0	0	0	0	0	0			GU	0	0	0	0	0	0	0	0	0	0	0		ILA2/3	#DIV/0!	#DIV/0!	#DIV/0!	#DIV/0!	#DIV/0!	#DIV/0!	#DIV/0!	#DIV/0!	#DIV/0!	#DIV/0!	#DIV/0!	#DIV/0!
MO	0	0	0	0	0	0	0	0	0	0	0			ILA2/3	0	0	0	0	0	0	0	0	0	0	0		MO	#DIV/0!	#DIV/0!	#DIV/0!	#DIV/0!	#DIV/0!	#DIV/0!	#DIV/0!	#DIV/0!	#DIV/0!	#DIV/0!	#DIV/0!	#DIV/0!
ORB	0	0	0	0	0	0	0	0	0	0	0			MO	0	0	0	0	0	0	0	0	0	0	0		ORB	#DIV/0!	#DIV/0!	#DIV/0!	#DIV/0!	#DIV/0!	#DIV/0!	#DIV/0!	#DIV/0!	#DIV/0!	#DIV/0!	#DIV/0!	#DIV/0!
PL	0	0	0	0	0	0	0	0	0	0	0			ORB	0	0	0	0	0	0	0	0	0	0	0		PL	#DIV/0!	#DIV/0!	#DIV/0!	#DIV/0!	#DIV/0!	#DIV/0!	#DIV/0!	#DIV/0!	#DIV/0!	#DIV/0!	#DIV/0!	#DIV/0!
PTLp	0	0	0	0	0	0	0	0	0	0	0			PL	0	0	0	0	0	0	0	0	0	0	0		PTLp	#DIV/0!	#DIV/0!	#DIV/0!	#DIV/0!	#DIV/0!	#DIV/0!	#DIV/0!	#DIV/0!	#DIV/0!	#DIV/0!	#DIV/0!	#DIV/0!
RSP	0	0	0	0	0	0	0	0	0	0	0			PTLp	0	0	0	0	0	0	0	0	0	0	0		RSP	#DIV/0!	#DIV/0!	#DIV/0!	#DIV/0!	#DIV/0!	#DIV/0!	#DIV/0!	#DIV/0!	#DIV/0!	#DIV/0!	#DIV/0!	#DIV/0!
SS	0	0	0	0	0	0	0	0	0	0	0			RSP	0	0	0	0	0	0	0	0	0	0	0		SS	#DIV/0!	#DIV/0!	#DIV/0!	#DIV/0!	#DIV/0!	#DIV/0!	#DIV/0!	#DIV/0!	#DIV/0!	#DIV/0!	#DIV/0!	#DIV/0!
VIS	0	0	0	0	0	0	0	0	0	0	0			SS	0	0	0	0	0	0	0	0	0	0	0		VIS	#DIV/0!	#DIV/0!	#DIV/0!	#DIV/0!	#DIV/0!	#DIV/0!	#DIV/0!	#DIV/0!	#DIV/0!	#DIV/0!	#DIV/0!	#DIV/0!
VISC	0	0	0	0	0	0	0	0	0	0	0			VIS	0	0	0	0	0	0	0	0	0	0	0		VISC	#DIV/0!	#DIV/0!	#DIV/0!	#DIV/0!	#DIV/0!	#DIV/0!	#DIV/0!	#DIV/0!	#DIV/0!	#DIV/0!	#DIV/0!	#DIV/0!
CP	0	0	0	0	0	0	0	0	0	0	0			VISC	0	0	0	0	0	0	0	0	0	0	0		CP	#DIV/0!	#DIV/0!	#DIV/0!	#DIV/0!	#DIV/0!	#DIV/0!	#DIV/0!	#DIV/0!	#DIV/0!	#DIV/0!	#DIV/0!	#DIV/0!
LS	0	0	0	0	0	0	0	0	0	0	0			TOTAL	0	0	0	0	0	0	0	0	0	0	0		LS	#DIV/0!	#DIV/0!	#DIV/0!	#DIV/0!	#DIV/0!	#DIV/0!	#DIV/0!	#DIV/0!	#DIV/0!	#DIV/0!	#DIV/0!	#DIV/0!
sAMY	0	0	0	0	0	0	0	0	0	0	0			NORMALIZE	#DIV/0!	#DIV/0!	#DIV/0!	#DIV/0!	#DIV/0!	#DIV/0!	#DIV/0!	#DIV/0!	#DIV/0!	#DIV/0!			sAMY	#DIV/0!	#DIV/0!	#DIV/0!	#DIV/0!	#DIV/0!	#DIV/0!	#DIV/0!	#DIV/0!	#DIV/0!	#DIV/0!	#DIV/0!	#DIV/0!
STRv	0	0	0	0	0	0	0	0	0	0	0			Striatum													STRv	#DIV/0!	#DIV/0!	#DIV/0!	#DIV/0!	#DIV/0!	#DIV/0!	#DIV/0!	#DIV/0!	#DIV/0!	#DIV/0!	#DIV/0!	#DIV/0!
GP	0	0	0	0	0	0	0	0	0	0	0				InputMouse#	InputMouse#	InputMouse#	InputMouse#	InputMouse#	InputMouse#	InputMouse#	InputMouse#	InputMouse#	InputMouse#	TOTAL		GP	#DIV/0!	#DIV/0!	#DIV/0!	#DIV/0!	#DIV/0!	#DIV/0!	#DIV/0!	#DIV/0!	#DIV/0!	#DIV/0!	#DIV/0!	#DIV/0!
PALc	0	0	0	0	0	0	0	0	0	0	0			CP	0	0	0	0	0	0	0	0	0	0	0		PALc	#DIV/0!	#DIV/0!	#DIV/0!	#DIV/0!	#DIV/0!	#DIV/0!	#DIV/0!	#DIV/0!	#DIV/0!	#DIV/0!	#DIV/0!	#DIV/0!
PALm	0	0	0	0	0	0	0	0	0	0	0			LS	0	0	0	0	0	0	0	0	0	0	0		PALm	#DIV/0!	#DIV/0!	#DIV/0!	#DIV/0!	#DIV/0!	#DIV/0!	#DIV/0!	#DIV/0!	#DIV/0!	#DIV/0!	#DIV/0!	#DIV/0!
PALv	0	0	0	0	0	0	0	0	0	0	0			sAMY	0	0	0	0	0	0	0	0	0	0	0		PALv	#DIV/0!	#DIV/0!	#DIV/0!	#DIV/0!	#DIV/0!	#DIV/0!	#DIV/0!	#DIV/0!	#DIV/0!	#DIV/0!	#DIV/0!	#DIV/0!
LZ/ME	0	0	0	0	0	0	0	0	0	0	0			STRv	0	0	0	0	0	0	0	0	0	0	0		LZ/ME	#DIV/0!	#DIV/0!	#DIV/0!	#DIV/0!	#DIV/0!	#DIV/0!	#DIV/0!	#DIV/0!	#DIV/0!	#DIV/0!	#DIV/0!	#DIV/0!
MEZ	0	0	0	0	0	0	0	0	0	0	0			TOTAL	0	0	0	0	0	0	0	0	0	0	0		MEZ	#DIV/0!	#DIV/0!	#DIV/0!	#DIV/0!	#DIV/0!	#DIV/0!	#DIV/0!	#DIV/0!	#DIV/0!	#DIV/0!	#DIV/0!	#DIV/0!
PVR	0	0	0	0	0	0	0	0	0	0	0			NORMALIZE	#DIV/0!	#DIV/0!	#DIV/0!	#DIV/0!	#DIV/0!	#DIV/0!	#DIV/0!	#DIV/0!	#DIV/0!	#DIV/0!			PVR	#DIV/0!	#DIV/0!	#DIV/0!	#DIV/0!	#DIV/0!	#DIV/0!	#DIV/0!	#DIV/0!	#DIV/0!	#DIV/0!	#DIV/0!	#DIV/0!
PVZ	0	0	0	0	0	0	0	0	0	0	0			Pallidum													PVZ	#DIV/0!	#DIV/0!	#DIV/0!	#DIV/0!	#DIV/0!	#DIV/0!	#DIV/0!	#DIV/0!	#DIV/0!	#DIV/0!	#DIV/0!	#DIV/0!
AOB-dark/ Nlot	0	0	0	0	0	0	0	0	0	0	0				InputMouse#	InputMouse#	InputMouse#	InputMouse#	InputMouse#	InputMouse#	InputMouse#	InputMouse#	InputMouse#	InputMouse#	TOTAL		AOB-dark/ Nlot	#DIV/0!	#DIV/0!	#DIV/0!	#DIV/0!	#DIV/0!	#DIV/0!	#DIV/0!	#DIV/0!	#DIV/0!	#DIV/0!	#DIV/0!	#DIV/0!
AOB-light	0	0	0	0	0	0	0	0	0	0	0			GP	0	0	0	0	0	0	0	0	0	0	0		AOB-light	#DIV/0!	#DIV/0!	#DIV/0!	#DIV/0!	#DIV/0!	#DIV/0!	#DIV/0!	#DIV/0!	#DIV/0!	#DIV/0!	#DIV/0!	#DIV/0!
AON	0	0	0	0	0	0	0	0	0	0	0			PALc	0	0	0	0	0	0	0	0	0	0	0		AON	#DIV/0!	#DIV/0!	#DIV/0!	#DIV/0!	#DIV/0!	#DIV/0!	#DIV/0!	#DIV/0!	#DIV/0!	#DIV/0!	#DIV/0!	#DIV/0!
COA	0	0	0	0	0	0	0	0	0	0	0			PALm	0	0	0	0	0	0	0	0	0	0	0		COA	#DIV/0!	#DIV/0!	#DIV/0!	#DIV/0!	#DIV/0!	#DIV/0!	#DIV/0!	#DIV/0!	#DIV/0!	#DIV/0!	#DIV/0!	#DIV/0!
MOB-dark	0	0	0	0	0	0	0	0	0	0	0			PALv	0	0	0	0	0	0	0	0	0	0	0		MOB-dark	#DIV/0!	#DIV/0!	#DIV/0!	#DIV/0!	#DIV/0!	#DIV/0!	#DIV/0!	#DIV/0!	#DIV/0!	#DIV/0!	#DIV/0!	#DIV/0!
MOB-light	0	0	0	0	0	0	0	0	0	0	0			TOTAL	0	0	0	0	0	0	0	0	0	0	0		MOB-light	#DIV/0!	#DIV/0!	#DIV/0!	#DIV/0!	#DIV/0!	#DIV/0!	#DIV/0!	#DIV/0!	#DIV/0!	#DIV/0!	#DIV/0!	#DIV/0!
PAA	0	0	0	0	0	0	0	0	0	0	0			NORMALIZE	#DIV/0!	#DIV/0!	#DIV/0!	#DIV/0!	#DIV/0!	#DIV/0!	#DIV/0!	#DIV/0!	#DIV/0!	#DIV/0!			PAA	#DIV/0!	#DIV/0!	#DIV/0!	#DIV/0!	#DIV/0!	#DIV/0!	#DIV/0!	#DIV/0!	#DIV/0!	#DIV/0!	#DIV/0!	#DIV/0!
PIR	0	0	0	0	0	0	0	0	0	0	0			Hypothalamus													PIR	#DIV/0!	#DIV/0!	#DIV/0!	#DIV/0!	#DIV/0!	#DIV/0!	#DIV/0!	#DIV/0!	#DIV/0!	#DIV/0!	#DIV/0!	#DIV/0!
TR	0	0	0	0	0	0	0	0	0	0	0				InputMouse#	InputMouse#	InputMouse#	InputMouse#	InputMouse#	InputMouse#	InputMouse#	InputMouse#	InputMouse#	InputMouse#	TOTAL		TR	#DIV/0!	#DIV/0!	#DIV/0!	#DIV/0!	#DIV/0!	#DIV/0!	#DIV/0!	#DIV/0!	#DIV/0!	#DIV/0!	#DIV/0!	#DIV/0!
TT	0	0	0	0	0	0	0	0	0	0	0			LZ/ME	0	0	0	0	0	0	0	0	0	0	0		TT	#DIV/0!	#DIV/0!	#DIV/0!	#DIV/0!	#DIV/0!	#DIV/0!	#DIV/0!	#DIV/0!	#DIV/0!	#DIV/0!	#DIV/0!	#DIV/0!
BLA	0	0	0	0	0	0	0	0	0	0	0			MEZ	0	0	0	0	0	0	0	0	0	0	0		BLA	#DIV/0!	#DIV/0!	#DIV/0!	#DIV/0!	#DIV/0!	#DIV/0!	#DIV/0!	#DIV/0!	#DIV/0!	#DIV/0!	#DIV/0!	#DIV/0!
BMA	0	0	0	0	0	0	0	0	0	0	0			PVR	0	0	0	0	0	0	0	0	0	0	0		BMA	#DIV/0!	#DIV/0!	#DIV/0!	#DIV/0!	#DIV/0!	#DIV/0!	#DIV/0!	#DIV/0!	#DIV/0!	#DIV/0!	#DIV/0!	#DIV/0!
CLA	0	0	0	0	0	0	0	0	0	0	0			PVZ	0	0	0	0	0	0	0	0	0	0	0		CLA	#DIV/0!	#DIV/0!	#DIV/0!	#DIV/0!	#DIV/0!	#DIV/0!	#DIV/0!	#DIV/0!	#DIV/0!	#DIV/0!	#DIV/0!	#DIV/0!
EP	0	0	0	0	0	0	0	0	0	0	0			TOTAL	0	0	0	0	0	0	0	0	0	0	0		EP	#DIV/0!	#DIV/0!	#DIV/0!	#DIV/0!	#DIV/0!	#DIV/0!	#DIV/0!	#DIV/0!	#DIV/0!	#DIV/0!	#DIV/0!	#DIV/0!
PA	0	0	0	0	0	0	0	0	0	0	0			NORMALIZE	#DIV/0!	#DIV/0!	#DIV/0!	#DIV/0!	#DIV/0!	#DIV/0!	#DIV/0!	#DIV/0!	#DIV/0!	#DIV/0!			PA	#DIV/0!	#DIV/0!	#DIV/0!	#DIV/0!	#DIV/0!	#DIV/0!	#DIV/0!	#DIV/0!	#DIV/0!	#DIV/0!	#DIV/0!	#DIV/0!
DOR-pm	0	0	0	0	0	0	0	0	0	0	0			Olfactory Areas													DOR-pm	#DIV/0!	#DIV/0!	#DIV/0!	#DIV/0!	#DIV/0!	#DIV/0!	#DIV/0!	#DIV/0!	#DIV/0!	#DIV/0!	#DIV/0!	#DIV/0!
DOR-sm	0	0	0	0	0	0	0	0	0	0	0				InputMouse#	InputMouse#	InputMouse#	InputMouse#	InputMouse#	InputMouse#	InputMouse#	InputMouse#	InputMouse#	InputMouse#	TOTAL		DOR-sm	#DIV/0!	#DIV/0!	#DIV/0!	#DIV/0!	#DIV/0!	#DIV/0!	#DIV/0!	#DIV/0!	#DIV/0!	#DIV/0!	#DIV/0!	#DIV/0!
LA	0	0	0	0	0	0	0	0	0	0	0			AOB-dark/ Nlot	0	0	0	0	0	0	0	0	0	0	0		LA	#DIV/0!	#DIV/0!	#DIV/0!	#DIV/0!	#DIV/0!	#DIV/0!	#DIV/0!	#DIV/0!	#DIV/0!	#DIV/0!	#DIV/0!	#DIV/0!
MB-mot	0	0	0	0	0	0	0	0	0	0	0			AOB-light	0	0	0	0	0	0	0	0	0	0	0		MB-mot	#DIV/0!	#DIV/0!	#DIV/0!	#DIV/0!	#DIV/0!	#DIV/0!	#DIV/0!	#DIV/0!	#DIV/0!	#DIV/0!	#DIV/0!	#DIV/0!
MB-sen	0	0	0	0	0	0	0	0	0	0	0			AON	0	0	0	0	0	0	0	0	0	0	0		MB-sen	#DIV/0!	#DIV/0!	#DIV/0!	#DIV/0!	#DIV/0!	#DIV/0!	#DIV/0!	#DIV/0!	#DIV/0!	#DIV/0!	#DIV/0!	#DIV/0!
MB-sta	0	0	0	0	0	0	0	0	0	0	0			COA	0	0	0	0	0	0	0	0	0	0	0		MB-sta	#DIV/0!	#DIV/0!	#DIV/0!	#DIV/0!	#DIV/0!	#DIV/0!	#DIV/0!	#DIV/0!	#DIV/0!	#DIV/0!	#DIV/0!	#DIV/0!
ENT	0	0	0	0	0	0	0	0	0	0	0			MOB-dark	0	0	0	0	0	0	0	0	0	0	0		ENT	#DIV/0!	#DIV/0!	#DIV/0!	#DIV/0!	#DIV/0!	#DIV/0!	#DIV/0!	#DIV/0!	#DIV/0!	#DIV/0!	#DIV/0!	#DIV/0!
CA123_pyramidal/DG_granule	0	0	0	0	0	0	0	0	0	0	0			MOB-light	0	0	0	0	0	0	0	0	0	0	0		CA123_pyramidal/DG_granule	#DIV/0!	#DIV/0!	#DIV/0!	#DIV/0!	#DIV/0!	#DIV/0!	#DIV/0!	#DIV/0!	#DIV/0!	#DIV/0!	#DIV/0!	#DIV/0!
CA123 / DG	0	0	0	0	0	0	0	0	0	0	0			PAA	0	0	0	0	0	0	0	0	0	0	0		CA123 / DG	#DIV/0!	#DIV/0!	#DIV/0!	#DIV/0!	#DIV/0!	#DIV/0!	#DIV/0!	#DIV/0!	#DIV/0!	#DIV/0!	#DIV/0!	#DIV/0!
PAR	0	0	0	0	0	0	0	0	0	0	0			PIR	0	0	0	0	0	0	0	0	0	0	0		PAR	#DIV/0!	#DIV/0!	#DIV/0!	#DIV/0!	#DIV/0!	#DIV/0!	#DIV/0!	#DIV/0!	#DIV/0!	#DIV/0!	#DIV/0!	#DIV/0!
POST	0	0	0	0	0	0	0	0	0	0	0			TR	0	0	0	0	0	0	0	0	0	0	0		POST	#DIV/0!	#DIV/0!	#DIV/0!	#DIV/0!	#DIV/0!	#DIV/0!	#DIV/0!	#DIV/0!	#DIV/0!	#DIV/0!	#DIV/0!	#DIV/0!
PRE	0	0	0	0	0	0	0	0	0	0	0			TT	0	0	0	0	0	0	0	0	0	0	0		PRE	#DIV/0!	#DIV/0!	#DIV/0!	#DIV/0!	#DIV/0!	#DIV/0!	#DIV/0!	#DIV/0!	#DIV/0!	#DIV/0!	#DIV/0!	#DIV/0!
SUB	0	0	0	0	0	0	0	0	0	0	0			TOTAL	0	0	0	0	0	0	0	0	0	0	0		SUB	#DIV/0!	#DIV/0!	#DIV/0!	#DIV/0!	#DIV/0!	#DIV/0!	#DIV/0!	#DIV/0!	#DIV/0!	#DIV/0!	#DIV/0!	#DIV/0!
CBX-granular	0	0	0	0	0	0	0	0	0	0	0			NORMALIZE	#DIV/0!	#DIV/0!	#DIV/0!	#DIV/0!	#DIV/0!	#DIV/0!	#DIV/0!	#DIV/0!	#DIV/0!	#DIV/0!			CBX-granular	#DIV/0!	#DIV/0!	#DIV/0!	#DIV/0!	#DIV/0!	#DIV/0!	#DIV/0!	#DIV/0!	#DIV/0!	#DIV/0!	#DIV/0!	#DIV/0!
CBX-molecular	0	0	0	0	0	0	0	0	0	0	0			Cortical Subplate													CBX-molecular	#DIV/0!	#DIV/0!	#DIV/0!	#DIV/0!	#DIV/0!	#DIV/0!	#DIV/0!	#DIV/0!	#DIV/0!	#DIV/0!	#DIV/0!	#DIV/0!
DN	0	0	0	0	0	0	0	0	0	0	0				InputMouse#	InputMouse#	InputMouse#	InputMouse#	InputMouse#	InputMouse#	InputMouse#	InputMouse#	InputMouse#	InputMouse#	TOTAL		DN	#DIV/0!	#DIV/0!	#DIV/0!	#DIV/0!	#DIV/0!	#DIV/0!	#DIV/0!	#DIV/0!	#DIV/0!	#DIV/0!	#DIV/0!	#DIV/0!
P-mot	0	0	0	0	0	0	0	0	0	0	0			BLA	0	0	0	0	0	0	0	0	0	0	0		P-mot	#DIV/0!	#DIV/0!	#DIV/0!	#DIV/0!	#DIV/0!	#DIV/0!	#DIV/0!	#DIV/0!	#DIV/0!	#DIV/0!	#DIV/0!	#DIV/0!
P-sat	0	0	0	0	0	0	0	0	0	0	0			BMA	0	0	0	0	0	0	0	0	0	0	0		P-sat	#DIV/0!	#DIV/0!	#DIV/0!	#DIV/0!	#DIV/0!	#DIV/0!	#DIV/0!	#DIV/0!	#DIV/0!	#DIV/0!	#DIV/0!	#DIV/0!
P-sen	0	0	0	0	0	0	0	0	0	0	0			CLA	0	0	0	0	0	0	0	0	0	0	0		P-sen	#DIV/0!	#DIV/0!	#DIV/0!	#DIV/0!	#DIV/0!	#DIV/0!	#DIV/0!	#DIV/0!	#DIV/0!	#DIV/0!	#DIV/0!	#DIV/0!
MY-mot	0	0	0	0	0	0	0	0	0	0	0			EP	0	0	0	0	0	0	0	0	0	0	0		MY-mot	#DIV/0!	#DIV/0!	#DIV/0!	#DIV/0!	#DIV/0!	#DIV/0!	#DIV/0!	#DIV/0!	#DIV/0!	#DIV/0!	#DIV/0!	#DIV/0!
MY-sat	0	0	0	0	0	0	0	0	0	0	0			PA	0	0	0	0	0	0	0	0	0	0	0		MY-sat	#DIV/0!	#DIV/0!	#DIV/0!	#DIV/0!	#DIV/0!	#DIV/0!	#DIV/0!	#DIV/0!	#DIV/0!	#DIV/0!	#DIV/0!	#DIV/0!
MY-sen	0	0	0	0	0	0	0	0	0	0	0			TOTAL	0	0	0	0	0	0	0	0	0	0	0		MY-sen	#DIV/0!	#DIV/0!	#DIV/0!	#DIV/0!	#DIV/0!	#DIV/0!	#DIV/0!	#DIV/0!	#DIV/0!	#DIV/0!	#DIV/0!	#DIV/0!
blue gray tracts	0	0	0	0	0	0	0	0	0	0	0			NORMALIZE	#DIV/0!	#DIV/0!	#DIV/0!	#DIV/0!	#DIV/0!	#DIV/0!	#DIV/0!	#DIV/0!	#DIV/0!	#DIV/0!			blue gray tracts	#DIV/0!	#DIV/0!	#DIV/0!	#DIV/0!	#DIV/0!	#DIV/0!	#DIV/0!	#DIV/0!	#DIV/0!	#DIV/0!	#DIV/0!	#DIV/0!
light grey tracts	0	0	0	0	0	0	0	0	0	0	0			Thalamus													light grey tracts	#DIV/0!	#DIV/0!	#DIV/0!	#DIV/0!	#DIV/0!	#DIV/0!	#DIV/0!	#DIV/0!	#DIV/0!	#DIV/0!	#DIV/0!	#DIV/0!
CBX-tracts	0	0	0	0	0	0	0	0	0	0	0				InputMouse#	InputMouse#	InputMouse#	InputMouse#	InputMouse#	InputMouse#	InputMouse#	InputMouse#	InputMouse#	InputMouse#	TOTAL		CBX-tracts	#DIV/0!	#DIV/0!	#DIV/0!	#DIV/0!	#DIV/0!	#DIV/0!	#DIV/0!	#DIV/0!	#DIV/0!	#DIV/0!	#DIV/0!	#DIV/0!
CTX tracts	0	0	0	0	0	0	0	0	0	0	0			DOR-pm	0	0	0	0	0	0	0	0	0	0	0		CTX tracts	#DIV/0!	#DIV/0!	#DIV/0!	#DIV/0!	#DIV/0!	#DIV/0!	#DIV/0!	#DIV/0!	#DIV/0!	#DIV/0!	#DIV/0!	#DIV/0!
HY-tracts	0	0	0	0	0	0	0	0	0	0	0			DOR-sm	0	0	0	0	0	0	0	0	0	0	0		HY-tracts	#DIV/0!	#DIV/0!	#DIV/0!	#DIV/0!	#DIV/0!	#DIV/0!	#DIV/0!	#DIV/0!	#DIV/0!	#DIV/0!	#DIV/0!	#DIV/0!
MB-tracts	0	0	0	0	0	0	0	0	0	0	0			TOTAL	0	0	0	0	0	0	0	0	0	0	0		MB-tracts	#DIV/0!	#DIV/0!	#DIV/0!	#DIV/0!	#DIV/0!	#DIV/0!	#DIV/0!	#DIV/0!	#DIV/0!	#DIV/0!	#DIV/0!	#DIV/0!
MY-tracts	0	0	0	0	0	0	0	0	0	0	0			NORMALIZE	#DIV/0!	#DIV/0!	#DIV/0!	#DIV/0!	#DIV/0!	#DIV/0!	#DIV/0!	#DIV/0!	#DIV/0!	#DIV/0!			MY-tracts	#DIV/0!	#DIV/0!	#DIV/0!	#DIV/0!	#DIV/0!	#DIV/0!	#DIV/0!	#DIV/0!	#DIV/0!	#DIV/0!	#DIV/0!	#DIV/0!
P-tracts	0	0	0	0	0	0	0	0	0	0	0			Midbrain													P-tracts	#DIV/0!	#DIV/0!	#DIV/0!	#DIV/0!	#DIV/0!	#DIV/0!	#DIV/0!	#DIV/0!	#DIV/0!	#DIV/0!	#DIV/0!	#DIV/0!
TH-tracts	0	0	0	0	0	0	0	0	0	0	0				InputMouse#	InputMouse#	InputMouse#	InputMouse#	InputMouse#	InputMouse#	InputMouse#	InputMouse#	InputMouse#	InputMouse#	TOTAL		TH-tracts	#DIV/0!	#DIV/0!	#DIV/0!	#DIV/0!	#DIV/0!	#DIV/0!	#DIV/0!	#DIV/0!	#DIV/0!	#DIV/0!	#DIV/0!	#DIV/0!
ventricles	0	0	0	0	0	0	0	0	0	0	0			LA	0	0	0	0	0	0	0	0	0	0	0		ventricles	#DIV/0!	#DIV/0!	#DIV/0!	#DIV/0!	#DIV/0!	#DIV/0!	#DIV/0!	#DIV/0!	#DIV/0!	#DIV/0!	#DIV/0!	#DIV/0!
TOTAL	0	0	0	0	0	0	0	0	0	0	0			MB-mot	0	0	0	0	0	0	0	0	0	0	0
														MB-sen	0	0	0	0	0	0	0	0	0	0	0
														MB-sta	0	0	0	0	0	0	0	0	0	0	0
														TOTAL	0	0	0	0	0	0	0	0	0	0	0		Region	ACA	AI	ECT	FRP	GU	ILA2/3	MO	ORB	PL	PTLp	RSP	SS	VIS	VISC	CP	LS	sAMY	STRv	GP	PALc	PALm	PALv
														NORMALIZE	#DIV/0!	#DIV/0!	#DIV/0!	#DIV/0!	#DIV/0!	#DIV/0!	#DIV/0!	#DIV/0!	#DIV/0!	#DIV/0!			InputMouse#	#DIV/0!	#DIV/0!	#DIV/0!	#DIV/0!	#DIV/0!	#DIV/0!	#DIV/0!	#DIV/0!	#DIV/0!	#DIV/0!	#DIV/0!	#DIV/0!	#DIV/0!	#DIV/0!	#DIV/0!	#DIV/0!	#DIV/0!	#DIV/0!	#DIV/0!	#DIV/0!	#DIV/0!	#DIV/0!
														Hippocampal Formation													InputMouse#	#DIV/0!	#DIV/0!	#DIV/0!	#DIV/0!	#DIV/0!	#DIV/0!	#DIV/0!	#DIV/0!	#DIV/0!	#DIV/0!	#DIV/0!	#DIV/0!	#DIV/0!	#DIV/0!	#DIV/0!	#DIV/0!	#DIV/0!	#DIV/0!	#DIV/0!	#DIV/0!	#DIV/0!	#DIV/0!
															InputMouse#	InputMouse#	InputMouse#	InputMouse#	InputMouse#	InputMouse#	InputMouse#	InputMouse#	InputMouse#	InputMouse#	TOTAL		InputMouse#	#DIV/0!	#DIV/0!	#DIV/0!	#DIV/0!	#DIV/0!	#DIV/0!	#DIV/0!	#DIV/0!	#DIV/0!	#DIV/0!	#DIV/0!	#DIV/0!	#DIV/0!	#DIV/0!	#DIV/0!	#DIV/0!	#DIV/0!	#DIV/0!	#DIV/0!	#DIV/0!	#DIV/0!	#DIV/0!
														ENT	0	0	0	0	0	0	0	0	0	0	0		InputMouse#	#DIV/0!	#DIV/0!	#DIV/0!	#DIV/0!	#DIV/0!	#DIV/0!	#DIV/0!	#DIV/0!	#DIV/0!	#DIV/0!	#DIV/0!	#DIV/0!	#DIV/0!	#DIV/0!	#DIV/0!	#DIV/0!	#DIV/0!	#DIV/0!	#DIV/0!	#DIV/0!	#DIV/0!	#DIV/0!
														CA123_pyramidal/DG_granule	0	0	0	0	0	0	0	0	0	0	0		InputMouse#	#DIV/0!	#DIV/0!	#DIV/0!	#DIV/0!	#DIV/0!	#DIV/0!	#DIV/0!	#DIV/0!	#DIV/0!	#DIV/0!	#DIV/0!	#DIV/0!	#DIV/0!	#DIV/0!	#DIV/0!	#DIV/0!	#DIV/0!	#DIV/0!	#DIV/0!	#DIV/0!	#DIV/0!	#DIV/0!
														CA123 / DG	0	0	0	0	0	0	0	0	0	0	0		InputMouse#	#DIV/0!	#DIV/0!	#DIV/0!	#DIV/0!	#DIV/0!	#DIV/0!	#DIV/0!	#DIV/0!	#DIV/0!	#DIV/0!	#DIV/0!	#DIV/0!	#DIV/0!	#DIV/0!	#DIV/0!	#DIV/0!	#DIV/0!	#DIV/0!	#DIV/0!	#DIV/0!	#DIV/0!	#DIV/0!
														PAR	0	0	0	0	0	0	0	0	0	0	0		InputMouse#	#DIV/0!	#DIV/0!	#DIV/0!	#DIV/0!	#DIV/0!	#DIV/0!	#DIV/0!	#DIV/0!	#DIV/0!	#DIV/0!	#DIV/0!	#DIV/0!	#DIV/0!	#DIV/0!	#DIV/0!	#DIV/0!	#DIV/0!	#DIV/0!	#DIV/0!	#DIV/0!	#DIV/0!	#DIV/0!
														POST	0	0	0	0	0	0	0	0	0	0	0		InputMouse#	#DIV/0!	#DIV/0!	#DIV/0!	#DIV/0!	#DIV/0!	#DIV/0!	#DIV/0!	#DIV/0!	#DIV/0!	#DIV/0!	#DIV/0!	#DIV/0!	#DIV/0!	#DIV/0!	#DIV/0!	#DIV/0!	#DIV/0!	#DIV/0!	#DIV/0!	#DIV/0!	#DIV/0!	#DIV/0!
														PRE	0	0	0	0	0	0	0	0	0	0	0		InputMouse#	#DIV/0!	#DIV/0!	#DIV/0!	#DIV/0!	#DIV/0!	#DIV/0!	#DIV/0!	#DIV/0!	#DIV/0!	#DIV/0!	#DIV/0!	#DIV/0!	#DIV/0!	#DIV/0!	#DIV/0!	#DIV/0!	#DIV/0!	#DIV/0!	#DIV/0!	#DIV/0!	#DIV/0!	#DIV/0!
														SUB	0	0	0	0	0	0	0	0	0	0	0		InputMouse#	#DIV/0!	#DIV/0!	#DIV/0!	#DIV/0!	#DIV/0!	#DIV/0!	#DIV/0!	#DIV/0!	#DIV/0!	#DIV/0!	#DIV/0!	#DIV/0!	#DIV/0!	#DIV/0!	#DIV/0!	#DIV/0!	#DIV/0!	#DIV/0!	#DIV/0!	#DIV/0!	#DIV/0!	#DIV/0!
														TOTAL	0	0	0	0	0	0	0	0	0	0	0
														NORMALIZE	#DIV/0!	#DIV/0!	#DIV/0!	#DIV/0!	#DIV/0!	#DIV/0!	#DIV/0!	#DIV/0!	#DIV/0!	#DIV/0!
														Cerebellum
															InputMouse#	InputMouse#	InputMouse#	InputMouse#	InputMouse#	InputMouse#	InputMouse#	InputMouse#	InputMouse#	InputMouse#	TOTAL
														CBX-granular	0	0	0	0	0	0	0	0	0	0	0
														CBX-molecular	0	0	0	0	0	0	0	0	0	0	0
														DN	0	0	0	0	0	0	0	0	0	0	0
														TOTAL	0	0	0	0	0	0	0	0	0	0	0
														NORMALIZE	#DIV/0!	#DIV/0!	#DIV/0!	#DIV/0!	#DIV/0!	#DIV/0!	#DIV/0!	#DIV/0!	#DIV/0!	#DIV/0!
														Pons
															InputMouse#	InputMouse#	InputMouse#	InputMouse#	InputMouse#	InputMouse#	InputMouse#	InputMouse#	InputMouse#	InputMouse#	TOTAL
														P-mot	0	0	0	0	0	0	0	0	0	0	0
														P-sat	0	0	0	0	0	0	0	0	0	0	0
														P-sen	0	0	0	0	0	0	0	0	0	0	0
														TOTAL	0	0	0	0	0	0	0	0	0	0	0
														NORMALIZE	#DIV/0!	#DIV/0!	#DIV/0!	#DIV/0!	#DIV/0!	#DIV/0!	#DIV/0!	#DIV/0!	#DIV/0!	#DIV/0!
														Medulla
															InputMouse#	InputMouse#	InputMouse#	InputMouse#	InputMouse#	InputMouse#	InputMouse#	InputMouse#	InputMouse#	InputMouse#	TOTAL
														MY-mot	0	0	0	0	0	0	0	0	0	0	0
														MY-sat	0	0	0	0	0	0	0	0	0	0	0
														MY-sen	0	0	0	0	0	0	0	0	0	0	0
														TOTAL	0	0	0	0	0	0	0	0	0	0	0
														NORMALIZE	#DIV/0!	#DIV/0!	#DIV/0!	#DIV/0!	#DIV/0!	#DIV/0!	#DIV/0!	#DIV/0!	#DIV/0!	#DIV/0!
														Tracts
															InputMouse#	InputMouse#	InputMouse#	InputMouse#	InputMouse#	InputMouse#	InputMouse#	InputMouse#	InputMouse#	InputMouse#	TOTAL
														blue gray tracts	0	0	0	0	0	0	0	0	0	0	0
														light grey tracts	0	0	0	0	0	0	0	0	0	0	0
														CBX-tracts	0	0	0	0	0	0	0	0	0	0	0
														CTX tracts	0	0	0	0	0	0	0	0	0	0	0
														HY-tracts	0	0	0	0	0	0	0	0	0	0	0
														MB-tracts	0	0	0	0	0	0	0	0	0	0	0
														MY-tracts	0	0	0	0	0	0	0	0	0	0	0
														P-tracts	0	0	0	0	0	0	0	0	0	0	0
														TH-tracts	0	0	0	0	0	0	0	0	0	0	0
														ventricles	0	0	0	0	0	0	0	0	0	0	0
														TOTAL	0	0	0	0	0	0	0	0	0	0	0
														NORMALIZE	#DIV/0!	#DIV/0!	#DIV/0!	#DIV/0!	#DIV/0!	#DIV/0!	#DIV/0!	#DIV/0!	#DIV/0!	#DIV/0!
[truncated: 51 more columns]

## Sheet: Individual Regions Transpose
PcA
Region	ACA	AI	ECT	FRP	GU	ILA2/3	MO	ORB	PL	PTLp	RSP	SS	VIS	VISC	CP	LS	sAMY	STRv	GP	PALc	PALm	PALv	LZ/ME	MEZ	PVR	PVZ	AOB-dark/ Nlot	AOB-light	AON	COA	MOB-dark	MOB-light	PAA	PIR	TR	TT	BLA	BMA	CLA	EP	PA	DOR-pm	DOR-sm	LA	MB-mot	MB-sen	MB-sta	ENT	CA123_pyramidal/DG_granule
4150	0	10.7744	0	0	4.90213	0	0.125208	0	7.26495	10.5235	0	1.55905	1.61202	0	0.672178	0	0	0	0	0	0	0	1.02585	0.806975	0	0	0	0	0	0	2.77441	0.904118	0	0	0	1.28771	0	0	2.20329	0	0	3.07682	7.77995	0	0	0.782139	0	2.05757	1.74573
4151	0	0	0	0	0	0	0.37284	1.32102	0	0	0.570062	0.357116	0.685748	0	2.502	0	0	1.96055	0	4.71371	0	3.54644	3.05474	0	0	0	0	0	0	0	0	0	0	0	0	0	0	0	0	0	0	4.19929	10.8113	0	0.215387	0.582259	2.11581	0	1.2996
InputMouse#	#DIV/0!	#DIV/0!	#DIV/0!	#DIV/0!	#DIV/0!	#DIV/0!	#DIV/0!	#DIV/0!	#DIV/0!	#DIV/0!	#DIV/0!	#DIV/0!	#DIV/0!	#DIV/0!	#DIV/0!	#DIV/0!	#DIV/0!	#DIV/0!	#DIV/0!	#DIV/0!	#DIV/0!	#DIV/0!	#DIV/0!	#DIV/0!	#DIV/0!	#DIV/0!	#DIV/0!	#DIV/0!	#DIV/0!	#DIV/0!	#DIV/0!	#DIV/0!	#DIV/0!	#DIV/0!	#DIV/0!	#DIV/0!	#DIV/0!	#DIV/0!	#DIV/0!	#DIV/0!	#DIV/0!	#DIV/0!	#DIV/0!	#DIV/0!	#DIV/0!	#DIV/0!	#DIV/0!	#DIV/0!	#DIV/0!
InputMouse#	#DIV/0!	#DIV/0!	#DIV/0!	#DIV/0!	#DIV/0!	#DIV/0!	#DIV/0!	#DIV/0!	#DIV/0!	#DIV/0!	#DIV/0!	#DIV/0!	#DIV/0!	#DIV/0!	#DIV/0!	#DIV/0!	#DIV/0!	#DIV/0!	#DIV/0!	#DIV/0!	#DIV/0!	#DIV/0!	#DIV/0!	#DIV/0!	#DIV/0!	#DIV/0!	#DIV/0!	#DIV/0!	#DIV/0!	#DIV/0!	#DIV/0!	#DIV/0!	#DIV/0!	#DIV/0!	#DIV/0!	#DIV/0!	#DIV/0!	#DIV/0!	#DIV/0!	#DIV/0!	#DIV/0!	#DIV/0!	#DIV/0!	#DIV/0!	#DIV/0!	#DIV/0!	#DIV/0!	#DIV/0!	#DIV/0!
InputMouse#	#DIV/0!	#DIV/0!	#DIV/0!	#DIV/0!	#DIV/0!	#DIV/0!	#DIV/0!	#DIV/0!	#DIV/0!	#DIV/0!	#DIV/0!	#DIV/0!	#DIV/0!	#DIV/0!	#DIV/0!	#DIV/0!	#DIV/0!	#DIV/0!	#DIV/0!	#DIV/0!	#DIV/0!	#DIV/0!	#DIV/0!	#DIV/0!	#DIV/0!	#DIV/0!	#DIV/0!	#DIV/0!	#DIV/0!	#DIV/0!	#DIV/0!	#DIV/0!	#DIV/0!	#DIV/0!	#DIV/0!	#DIV/0!	#DIV/0!	#DIV/0!	#DIV/0!	#DIV/0!	#DIV/0!	#DIV/0!	#DIV/0!	#DIV/0!	#DIV/0!	#DIV/0!	#DIV/0!	#DIV/0!	#DIV/0!
InputMouse#	#DIV/0!	#DIV/0!	#DIV/0!	#DIV/0!	#DIV/0!	#DIV/0!	#DIV/0!	#DIV/0!	#DIV/0!	#DIV/0!	#DIV/0!	#DIV/0!	#DIV/0!	#DIV/0!	#DIV/0!	#DIV/0!	#DIV/0!	#DIV/0!	#DIV/0!	#DIV/0!	#DIV/0!	#DIV/0!	#DIV/0!	#DIV/0!	#DIV/0!	#DIV/0!	#DIV/0!	#DIV/0!	#DIV/0!	#DIV/0!	#DIV/0!	#DIV/0!	#DIV/0!	#DIV/0!	#DIV/0!	#DIV/0!	#DIV/0!	#DIV/0!	#DIV/0!	#DIV/0!	#DIV/0!	#DIV/0!	#DIV/0!	#DIV/0!	#DIV/0!	#DIV/0!	#DIV/0!	#DIV/0!	#DIV/0!
InputMouse#	#DIV/0!	#DIV/0!	#DIV/0!	#DIV/0!	#DIV/0!	#DIV/0!	#DIV/0!	#DIV/0!	#DIV/0!	#DIV/0!	#DIV/0!	#DIV/0!	#DIV/0!	#DIV/0!	#DIV/0!	#DIV/0!	#DIV/0!	#DIV/0!	#DIV/0!	#DIV/0!	#DIV/0!	#DIV/0!	#DIV/0!	#DIV/0!	#DIV/0!	#DIV/0!	#DIV/0!	#DIV/0!	#DIV/0!	#DIV/0!	#DIV/0!	#DIV/0!	#DIV/0!	#DIV/0!	#DIV/0!	#DIV/0!	#DIV/0!	#DIV/0!	#DIV/0!	#DIV/0!	#DIV/0!	#DIV/0!	#DIV/0!	#DIV/0!	#DIV/0!	#DIV/0!	#DIV/0!	#DIV/0!	#DIV/0!
InputMouse#	#DIV/0!	#DIV/0!	#DIV/0!	#DIV/0!	#DIV/0!	#DIV/0!	#DIV/0!	#DIV/0!	#DIV/0!	#DIV/0!	#DIV/0!	#DIV/0!	#DIV/0!	#DIV/0!	#DIV/0!	#DIV/0!	#DIV/0!	#DIV/0!	#DIV/0!	#DIV/0!	#DIV/0!	#DIV/0!	#DIV/0!	#DIV/0!	#DIV/0!	#DIV/0!	#DIV/0!	#DIV/0!	#DIV/0!	#DIV/0!	#DIV/0!	#DIV/0!	#DIV/0!	#DIV/0!	#DIV/0!	#DIV/0!	#DIV/0!	#DIV/0!	#DIV/0!	#DIV/0!	#DIV/0!	#DIV/0!	#DIV/0!	#DIV/0!	#DIV/0!	#DIV/0!	#DIV/0!	#DIV/0!	#DIV/0!
InputMouse#	#DIV/0!	#DIV/0!	#DIV/0!	#DIV/0!	#DIV/0!	#DIV/0!	#DIV/0!	#DIV/0!	#DIV/0!	#DIV/0!	#DIV/0!	#DIV/0!	#DIV/0!	#DIV/0!	#DIV/0!	#DIV/0!	#DIV/0!	#DIV/0!	#DIV/0!	#DIV/0!	#DIV/0!	#DIV/0!	#DIV/0!	#DIV/0!	#DIV/0!	#DIV/0!	#DIV/0!	#DIV/0!	#DIV/0!	#DIV/0!	#DIV/0!	#DIV/0!	#DIV/0!	#DIV/0!	#DIV/0!	#DIV/0!	#DIV/0!	#DIV/0!	#DIV/0!	#DIV/0!	#DIV/0!	#DIV/0!	#DIV/0!	#DIV/0!	#DIV/0!	#DIV/0!	#DIV/0!	#DIV/0!	#DIV/0!
InputMouse#	#DIV/0!	#DIV/0!	#DIV/0!	#DIV/0!	#DIV/0!	#DIV/0!	#DIV/0!	#DIV/0!	#DIV/0!	#DIV/0!	#DIV/0!	#DIV/0!	#DIV/0!	#DIV/0!	#DIV/0!	#DIV/0!	#DIV/0!	#DIV/0!	#DIV/0!	#DIV/0!	#DIV/0!	#DIV/0!	#DIV/0!	#DIV/0!	#DIV/0!	#DIV/0!	#DIV/0!	#DIV/0!	#DIV/0!	#DIV/0!	#DIV/0!	#DIV/0!	#DIV/0!	#DIV/0!	#DIV/0!	#DIV/0!	#DIV/0!	#DIV/0!	#DIV/0!	#DIV/0!	#DIV/0!	#DIV/0!	#DIV/0!	#DIV/0!	#DIV/0!	#DIV/0!	#DIV/0!	#DIV/0!	#DIV/0!
CEP
Region	ACA	AI	ECT	FRP	GU	ILA2/3	MO	ORB	PL	PTLp	RSP	SS	VIS	VISC	CP	LS	sAMY	STRv	GP	PALc	PALm	PALv	LZ/ME	MEZ	PVR	PVZ	AOB-dark/ Nlot	AOB-light	AON	COA	MOB-dark	MOB-light	PAA	PIR	TR	TT	BLA	BMA	CLA	EP	PA	DOR-pm	DOR-sm	LA	MB-mot	MB-sen	MB-sta	ENT	CA123_pyramidal/DG_granule
4157	0	0	0	0	0	0	4.48314	0.240671	0	1.14182	3.32344	1.75667	2.49868	1.53445	0.273498	0.48074	0	0.71437	1.87569	0	0	0.646112	0	0	0	0	2.57955	0	0	0	0.410494	1.30798	0	0.932306	0	0	0	0	0	0	0	1.25191	1.12552	0	0.549368	1.0608	1.54189	1.11625	0
InputMouse#	#DIV/0!	#DIV/0!	#DIV/0!	#DIV/0!	#DIV/0!	#DIV/0!	#DIV/0!	#DIV/0!	#DIV/0!	#DIV/0!	#DIV/0!	#DIV/0!	#DIV/0!	#DIV/0!	#DIV/0!	#DIV/0!	#DIV/0!	#DIV/0!	#DIV/0!	#DIV/0!	#DIV/0!	#DIV/0!	#DIV/0!	#DIV/0!	#DIV/0!	#DIV/0!	#DIV/0!	#DIV/0!	#DIV/0!	#DIV/0!	#DIV/0!	#DIV/0!	#DIV/0!	#DIV/0!	#DIV/0!	#DIV/0!	#DIV/0!	#DIV/0!	#DIV/0!	#DIV/0!	#DIV/0!	#DIV/0!	#DIV/0!	#DIV/0!	#DIV/0!	#DIV/0!	#DIV/0!	#DIV/0!	#DIV/0!
InputMouse#	#DIV/0!	#DIV/0!	#DIV/0!	#DIV/0!	#DIV/0!	#DIV/0!	#DIV/0!	#DIV/0!	#DIV/0!	#DIV/0!	#DIV/0!	#DIV/0!	#DIV/0!	#DIV/0!	#DIV/0!	#DIV/0!	#DIV/0!	#DIV/0!	#DIV/0!	#DIV/0!	#DIV/0!	#DIV/0!	#DIV/0!	#DIV/0!	#DIV/0!	#DIV/0!	#DIV/0!	#DIV/0!	#DIV/0!	#DIV/0!	#DIV/0!	#DIV/0!	#DIV/0!	#DIV/0!	#DIV/0!	#DIV/0!	#DIV/0!	#DIV/0!	#DIV/0!	#DIV/0!	#DIV/0!	#DIV/0!	#DIV/0!	#DIV/0!	#DIV/0!	#DIV/0!	#DIV/0!	#DIV/0!	#DIV/0!
InputMouse#	#DIV/0!	#DIV/0!	#DIV/0!	#DIV/0!	#DIV/0!	#DIV/0!	#DIV/0!	#DIV/0!	#DIV/0!	#DIV/0!	#DIV/0!	#DIV/0!	#DIV/0!	#DIV/0!	#DIV/0!	#DIV/0!	#DIV/0!	#DIV/0!	#DIV/0!	#DIV/0!	#DIV/0!	#DIV/0!	#DIV/0!	#DIV/0!	#DIV/0!	#DIV/0!	#DIV/0!	#DIV/0!	#DIV/0!	#DIV/0!	#DIV/0!	#DIV/0!	#DIV/0!	#DIV/0!	#DIV/0!	#DIV/0!	#DIV/0!	#DIV/0!	#DIV/0!	#DIV/0!	#DIV/0!	#DIV/0!	#DIV/0!	#DIV/0!	#DIV/0!	#DIV/0!	#DIV/0!	#DIV/0!	#DIV/0!
InputMouse#	#DIV/0!	#DIV/0!	#DIV/0!	#DIV/0!	#DIV/0!	#DIV/0!	#DIV/0!	#DIV/0!	#DIV/0!	#DIV/0!	#DIV/0!	#DIV/0!	#DIV/0!	#DIV/0!	#DIV/0!	#DIV/0!	#DIV/0!	#DIV/0!	#DIV/0!	#DIV/0!	#DIV/0!	#DIV/0!	#DIV/0!	#DIV/0!	#DIV/0!	#DIV/0!	#DIV/0!	#DIV/0!	#DIV/0!	#DIV/0!	#DIV/0!	#DIV/0!	#DIV/0!	#DIV/0!	#DIV/0!	#DIV/0!	#DIV/0!	#DIV/0!	#DIV/0!	#DIV/0!	#DIV/0!	#DIV/0!	#DIV/0!	#DIV/0!	#DIV/0!	#DIV/0!	#DIV/0!	#DIV/0!	#DIV/0!
InputMouse#	#DIV/0!	#DIV/0!	#DIV/0!	#DIV/0!	#DIV/0!	#DIV/0!	#DIV/0!	#DIV/0!	#DIV/0!	#DIV/0!	#DIV/0!	#DIV/0!	#DIV/0!	#DIV/0!	#DIV/0!	#DIV/0!	#DIV/0!	#DIV/0!	#DIV/0!	#DIV/0!	#DIV/0!	#DIV/0!	#DIV/0!	#DIV/0!	#DIV/0!	#DIV/0!	#DIV/0!	#DIV/0!	#DIV/0!	#DIV/0!	#DIV/0!	#DIV/0!	#DIV/0!	#DIV/0!	#DIV/0!	#DIV/0!	#DIV/0!	#DIV/0!	#DIV/0!	#DIV/0!	#DIV/0!	#DIV/0!	#DIV/0!	#DIV/0!	#DIV/0!	#DIV/0!	#DIV/0!	#DIV/0!	#DIV/0!
InputMouse#	#DIV/0!	#DIV/0!	#DIV/0!	#DIV/0!	#DIV/0!	#DIV/0!	#DIV/0!	#DIV/0!	#DIV/0!	#DIV/0!	#DIV/0!	#DIV/0!	#DIV/0!	#DIV/0!	#DIV/0!	#DIV/0!	#DIV/0!	#DIV/0!	#DIV/0!	#DIV/0!	#DIV/0!	#DIV/0!	#DIV/0!	#DIV/0!	#DIV/0!	#DIV/0!	#DIV/0!	#DIV/0!	#DIV/0!	#DIV/0!	#DIV/0!	#DIV/0!	#DIV/0!	#DIV/0!	#DIV/0!	#DIV/0!	#DIV/0!	#DIV/0!	#DIV/0!	#DIV/0!	#DIV/0!	#DIV/0!	#DIV/0!	#DIV/0!	#DIV/0!	#DIV/0!	#DIV/0!	#DIV/0!	#DIV/0!
InputMouse#	#DIV/0!	#DIV/0!	#DIV/0!	#DIV/0!	#DIV/0!	#DIV/0!	#DIV/0!	#DIV/0!	#DIV/0!	#DIV/0!	#DIV/0!	#DIV/0!	#DIV/0!	#DIV/0!	#DIV/0!	#DIV/0!	#DIV/0!	#DIV/0!	#DIV/0!	#DIV/0!	#DIV/0!	#DIV/0!	#DIV/0!	#DIV/0!	#DIV/0!	#DIV/0!	#DIV/0!	#DIV/0!	#DIV/0!	#DIV/0!	#DIV/0!	#DIV/0!	#DIV/0!	#DIV/0!	#DIV/0!	#DIV/0!	#DIV/0!	#DIV/0!	#DIV/0!	#DIV/0!	#DIV/0!	#DIV/0!	#DIV/0!	#DIV/0!	#DIV/0!	#DIV/0!	#DIV/0!	#DIV/0!	#DIV/0!
InputMouse#	#DIV/0!	#DIV/0!	#DIV/0!	#DIV/0!	#DIV/0!	#DIV/0!	#DIV/0!	#DIV/0!	#DIV/0!	#DIV/0!	#DIV/0!	#DIV/0!	#DIV/0!	#DIV/0!	#DIV/0!	#DIV/0!	#DIV/0!	#DIV/0!	#DIV/0!	#DIV/0!	#DIV/0!	#DIV/0!	#DIV/0!	#DIV/0!	#DIV/0!	#DIV/0!	#DIV/0!	#DIV/0!	#DIV/0!	#DIV/0!	#DIV/0!	#DIV/0!	#DIV/0!	#DIV/0!	#DIV/0!	#DIV/0!	#DIV/0!	#DIV/0!	#DIV/0!	#DIV/0!	#DIV/0!	#DIV/0!	#DIV/0!	#DIV/0!	#DIV/0!	#DIV/0!	#DIV/0!	#DIV/0!	#DIV/0!
InputMouse#	#DIV/0!	#DIV/0!	#DIV/0!	#DIV/0!	#DIV/0!	#DIV/0!	#DIV/0!	#DIV/0!	#DIV/0!	#DIV/0!	#DIV/0!	#DIV/0!	#DIV/0!	#DIV/0!	#DIV/0!	#DIV/0!	#DIV/0!	#DIV/0!	#DIV/0!	#DIV/0!	#DIV/0!	#DIV/0!	#DIV/0!	#DIV/0!	#DIV/0!	#DIV/0!	#DIV/0!	#DIV/0!	#DIV/0!	#DIV/0!	#DIV/0!	#DIV/0!	#DIV/0!	#DIV/0!	#DIV/0!	#DIV/0!	#DIV/0!	#DIV/0!	#DIV/0!	#DIV/0!	#DIV/0!	#DIV/0!	#DIV/0!	#DIV/0!	#DIV/0!	#DIV/0!	#DIV/0!	#DIV/0!	#DIV/0!
Saline
Region	ACA	AI	ECT	FRP	GU	ILA2/3	MO	ORB	PL	PTLp	RSP	SS	VIS	VISC	CP	LS	sAMY	STRv	GP	PALc	PALm	PALv	LZ/ME	MEZ	PVR	PVZ	AOB-dark/ Nlot	AOB-light	AON	COA	MOB-dark	MOB-light	PAA	PIR	TR	TT	BLA	BMA	CLA	EP	PA	DOR-pm	DOR-sm	LA	MB-mot	MB-sen	MB-sta	ENT	CA123_pyramidal/DG_granule
InputMouse#	#DIV/0!	#DIV/0!	#DIV/0!	#DIV/0!	#DIV/0!	#DIV/0!	#DIV/0!	#DIV/0!	#DIV/0!	#DIV/0!	#DIV/0!	#DIV/0!	#DIV/0!	#DIV/0!	#DIV/0!	#DIV/0!	#DIV/0!	#DIV/0!	#DIV/0!	#DIV/0!	#DIV/0!	#DIV/0!	#DIV/0!	#DIV/0!	#DIV/0!	#DIV/0!	#DIV/0!	#DIV/0!	#DIV/0!	#DIV/0!	#DIV/0!	#DIV/0!	#DIV/0!	#DIV/0!	#DIV/0!	#DIV/0!	#DIV/0!	#DIV/0!	#DIV/0!	#DIV/0!	#DIV/0!	#DIV/0!	#DIV/0!	#DIV/0!	#DIV/0!	#DIV/0!	#DIV/0!	#DIV/0!	#DIV/0!
InputMouse#	#DIV/0!	#DIV/0!	#DIV/0!	#DIV/0!	#DIV/0!	#DIV/0!	#DIV/0!	#DIV/0!	#DIV/0!	#DIV/0!	#DIV/0!	#DIV/0!	#DIV/0!	#DIV/0!	#DIV/0!	#DIV/0!	#DIV/0!	#DIV/0!	#DIV/0!	#DIV/0!	#DIV/0!	#DIV/0!	#DIV/0!	#DIV/0!	#DIV/0!	#DIV/0!	#DIV/0!	#DIV/0!	#DIV/0!	#DIV/0!	#DIV/0!	#DIV/0!	#DIV/0!	#DIV/0!	#DIV/0!	#DIV/0!	#DIV/0!	#DIV/0!	#DIV/0!	#DIV/0!	#DIV/0!	#DIV/0!	#DIV/0!	#DIV/0!	#DIV/0!	#DIV/0!	#DIV/0!	#DIV/0!	#DIV/0!
InputMouse#	#DIV/0!	#DIV/0!	#DIV/0!	#DIV/0!	#DIV/0!	#DIV/0!	#DIV/0!	#DIV/0!	#DIV/0!	#DIV/0!	#DIV/0!	#DIV/0!	#DIV/0!	#DIV/0!	#DIV/0!	#DIV/0!	#DIV/0!	#DIV/0!	#DIV/0!	#DIV/0!	#DIV/0!	#DIV/0!	#DIV/0!	#DIV/0!	#DIV/0!	#DIV/0!	#DIV/0!	#DIV/0!	#DIV/0!	#DIV/0!	#DIV/0!	#DIV/0!	#DIV/0!	#DIV/0!	#DIV/0!	#DIV/0!	#DIV/0!	#DIV/0!	#DIV/0!	#DIV/0!	#DIV/0!	#DIV/0!	#DIV/0!	#DIV/0!	#DIV/0!	#DIV/0!	#DIV/0!	#DIV/0!	#DIV/0!
InputMouse#	#DIV/0!	#DIV/0!	#DIV/0!	#DIV/0!	#DIV/0!	#DIV/0!	#DIV/0!	#DIV/0!	#DIV/0!	#DIV/0!	#DIV/0!	#DIV/0!	#DIV/0!	#DIV/0!	#DIV/0!	#DIV/0!	#DIV/0!	#DIV/0!	#DIV/0!	#DIV/0!	#DIV/0!	#DIV/0!	#DIV/0!	#DIV/0!	#DIV/0!	#DIV/0!	#DIV/0!	#DIV/0!	#DIV/0!	#DIV/0!	#DIV/0!	#DIV/0!	#DIV/0!	#DIV/0!	#DIV/0!	#DIV/0!	#DIV/0!	#DIV/0!	#DIV/0!	#DIV/0!	#DIV/0!	#DIV/0!	#DIV/0!	#DIV/0!	#DIV/0!	#DIV/0!	#DIV/0!	#DIV/0!	#DIV/0!
InputMouse#	#DIV/0!	#DIV/0!	#DIV/0!	#DIV/0!	#DIV/0!	#DIV/0!	#DIV/0!	#DIV/0!	#DIV/0!	#DIV/0!	#DIV/0!	#DIV/0!	#DIV/0!	#DIV/0!	#DIV/0!	#DIV/0!	#DIV/0!	#DIV/0!	#DIV/0!	#DIV/0!	#DIV/0!	#DIV/0!	#DIV/0!	#DIV/0!	#DIV/0!	#DIV/0!	#DIV/0!	#DIV/0!	#DIV/0!	#DIV/0!	#DIV/0!	#DIV/0!	#DIV/0!	#DIV/0!	#DIV/0!	#DIV/0!	#DIV/0!	#DIV/0!	#DIV/0!	#DIV/0!	#DIV/0!	#DIV/0!	#DIV/0!	#DIV/0!	#DIV/0!	#DIV/0!	#DIV/0!	#DIV/0!	#DIV/0!
InputMouse#	#DIV/0!	#DIV/0!	#DIV/0!	#DIV/0!	#DIV/0!	#DIV/0!	#DIV/0!	#DIV/0!	#DIV/0!	#DIV/0!	#DIV/0!	#DIV/0!	#DIV/0!	#DIV/0!	#DIV/0!	#DIV/0!	#DIV/0!	#DIV/0!	#DIV/0!	#DIV/0!	#DIV/0!	#DIV/0!	#DIV/0!	#DIV/0!	#DIV/0!	#DIV/0!	#DIV/0!	#DIV/0!	#DIV/0!	#DIV/0!	#DIV/0!	#DIV/0!	#DIV/0!	#DIV/0!	#DIV/0!	#DIV/0!	#DIV/0!	#DIV/0!	#DIV/0!	#DIV/0!	#DIV/0!	#DIV/0!	#DIV/0!	#DIV/0!	#DIV/0!	#DIV/0!	#DIV/0!	#DIV/0!	#DIV/0!
InputMouse#	#DIV/0!	#DIV/0!	#DIV/0!	#DIV/0!	#DIV/0!	#DIV/0!	#DIV/0!	#DIV/0!	#DIV/0!	#DIV/0!	#DIV/0!	#DIV/0!	#DIV/0!	#DIV/0!	#DIV/0!	#DIV/0!	#DIV/0!	#DIV/0!	#DIV/0!	#DIV/0!	#DIV/0!	#DIV/0!	#DIV/0!	#DIV/0!	#DIV/0!	#DIV/0!	#DIV/0!	#DIV/0!	#DIV/0!	#DIV/0!	#DIV/0!	#DIV/0!	#DIV/0!	#DIV/0!	#DIV/0!	#DIV/0!	#DIV/0!	#DIV/0!	#DIV/0!	#DIV/0!	#DIV/0!	#DIV/0!	#DIV/0!	#DIV/0!	#DIV/0!	#DIV/0!	#DIV/0!	#DIV/0!	#DIV/0!
InputMouse#	#DIV/0!	#DIV/0!	#DIV/0!	#DIV/0!	#DIV/0!	#DIV/0!	#DIV/0!	#DIV/0!	#DIV/0!	#DIV/0!	#DIV/0!	#DIV/0!	#DIV/0!	#DIV/0!	#DIV/0!	#DIV/0!	#DIV/0!	#DIV/0!	#DIV/0!	#DIV/0!	#DIV/0!	#DIV/0!	#DIV/0!	#DIV/0!	#DIV/0!	#DIV/0!	#DIV/0!	#DIV/0!	#DIV/0!	#DIV/0!	#DIV/0!	#DIV/0!	#DIV/0!	#DIV/0!	#DIV/0!	#DIV/0!	#DIV/0!	#DIV/0!	#DIV/0!	#DIV/0!	#DIV/0!	#DIV/0!	#DIV/0!	#DIV/0!	#DIV/0!	#DIV/0!	#DIV/0!	#DIV/0!	#DIV/0!
InputMouse#	#DIV/0!	#DIV/0!	#DIV/0!	#DIV/0!	#DIV/0!	#DIV/0!	#DIV/0!	#DIV/0!	#DIV/0!	#DIV/0!	#DIV/0!	#DIV/0!	#DIV/0!	#DIV/0!	#DIV/0!	#DIV/0!	#DIV/0!	#DIV/0!	#DIV/0!	#DIV/0!	#DIV/0!	#DIV/0!	#DIV/0!	#DIV/0!	#DIV/0!	#DIV/0!	#DIV/0!	#DIV/0!	#DIV/0!	#DIV/0!	#DIV/0!	#DIV/0!	#DIV/0!	#DIV/0!	#DIV/0!	#DIV/0!	#DIV/0!	#DIV/0!	#DIV/0!	#DIV/0!	#DIV/0!	#DIV/0!	#DIV/0!	#DIV/0!	#DIV/0!	#DIV/0!	#DIV/0!	#DIV/0!	#DIV/0!
InputMouse#	#DIV/0!	#DIV/0!	#DIV/0!	#DIV/0!	#DIV/0!	#DIV/0!	#DIV/0!	#DIV/0!	#DIV/0!	#DIV/0!	#DIV/0!	#DIV/0!	#DIV/0!	#DIV/0!	#DIV/0!	#DIV/0!	#DIV/0!	#DIV/0!	#DIV/0!	#DIV/0!	#DIV/0!	#DIV/0!	#DIV/0!	#DIV/0!	#DIV/0!	#DIV/0!	#DIV/0!	#DIV/0!	#DIV/0!	#DIV/0!	#DIV/0!	#DIV/0!	#DIV/0!	#DIV/0!	#DIV/0!	#DIV/0!	#DIV/0!	#DIV/0!	#DIV/0!	#DIV/0!	#DIV/0!	#DIV/0!	#DIV/0!	#DIV/0!	#DIV/0!	#DIV/0!	#DIV/0!	#DIV/0!	#DIV/0!
[truncated: 24 more columns]

## Sheet: Major Regions Transpose
PcA Total
Mouse	Isocortex	Striatum	Pallidum	Hypothalamus	Olfactory Areas	Cortical Subplate	Thalamus	Midbrain	Hippocampal Formation	Cerebellum	Pons	Medulla	Tracts
4150	41	4	0	3	15	1	27	2	17	8	0	6	10
4151	9	14	4	4	0	0	25	3	7	0	9	2	13
InputMouse#	0	0	0	0	0	0	0	0	0	0	0	0	0
InputMouse#	0	0	0	0	0	0	0	0	0	0	0	0	0
InputMouse#	0	0	0	0	0	0	0	0	0	0	0	0	0
InputMouse#	0	0	0	0	0	0	0	0	0	0	0	0	0
InputMouse#	0	0	0	0	0	0	0	0	0	0	0	0	0
InputMouse#	0	0	0	0	0	0	0	0	0	0	0	0	0
InputMouse#	0	0	0	0	0	0	0	0	0	0	0	0	0
InputMouse#	0	0	0	0	0	0	0	0	0	0	0	0	0
PcA Normalize
Mouse	Isocortex	Striatum	Pallidum	Hypothalamus	Olfactory Areas	Cortical Subplate	Thalamus	Midbrain	Hippocampal Formation	Cerebellum	Pons	Medulla	Tracts
4150	1.38163	0.357323	0	0.749441	1.12867	0.398329	4.63265	0.194194	1.86148	1.03587	0	0.755932	0.556655
4151	0.451557	1.86205	2.13224	1.48778	0	0	6.38658	0.4337	1.14122	0	2.96261	0.375166	1.07744
InputMouse#	#DIV/0!	#DIV/0!	#DIV/0!	#DIV/0!	#DIV/0!	#DIV/0!	#DIV/0!	#DIV/0!	#DIV/0!	#DIV/0!	#DIV/0!	#DIV/0!	#DIV/0!
InputMouse#	#DIV/0!	#DIV/0!	#DIV/0!	#DIV/0!	#DIV/0!	#DIV/0!	#DIV/0!	#DIV/0!	#DIV/0!	#DIV/0!	#DIV/0!	#DIV/0!	#DIV/0!
InputMouse#	#DIV/0!	#DIV/0!	#DIV/0!	#DIV/0!	#DIV/0!	#DIV/0!	#DIV/0!	#DIV/0!	#DIV/0!	#DIV/0!	#DIV/0!	#DIV/0!	#DIV/0!
InputMouse#	#DIV/0!	#DIV/0!	#DIV/0!	#DIV/0!	#DIV/0!	#DIV/0!	#DIV/0!	#DIV/0!	#DIV/0!	#DIV/0!	#DIV/0!	#DIV/0!	#DIV/0!
InputMouse#	#DIV/0!	#DIV/0!	#DIV/0!	#DIV/0!	#DIV/0!	#DIV/0!	#DIV/0!	#DIV/0!	#DIV/0!	#DIV/0!	#DIV/0!	#DIV/0!	#DIV/0!
InputMouse#	#DIV/0!	#DIV/0!	#DIV/0!	#DIV/0!	#DIV/0!	#DIV/0!	#DIV/0!	#DIV/0!	#DIV/0!	#DIV/0!	#DIV/0!	#DIV/0!	#DIV/0!
InputMouse#	#DIV/0!	#DIV/0!	#DIV/0!	#DIV/0!	#DIV/0!	#DIV/0!	#DIV/0!	#DIV/0!	#DIV/0!	#DIV/0!	#DIV/0!	#DIV/0!	#DIV/0!
InputMouse#	#DIV/0!	#DIV/0!	#DIV/0!	#DIV/0!	#DIV/0!	#DIV/0!	#DIV/0!	#DIV/0!	#DIV/0!	#DIV/0!	#DIV/0!	#DIV/0!	#DIV/0!
CEP Total
Mouse	Isocortex	Striatum	Pallidum	Hypothalamus	Olfactory Areas	Cortical Subplate	Thalamus	Midbrain	Hippocampal Formation	Cerebellum	Pons	Medulla	Tracts
4157	132	8	3	0	16	0	13	14	15	66	10	3	20
InputMouse#	0	0	0	0	0	0	0	0	0	0	0	0	0
InputMouse#	0	0	0	0	0	0	0	0	0	0	0	0	0
InputMouse#	0	0	0	0	0	0	0	0	0	0	0	0	0
InputMouse#	0	0	0	0	0	0	0	0	0	0	0	0	0
InputMouse#	0	0	0	0	0	0	0	0	0	0	0	0	0
InputMouse#	0	0	0	0	0	0	0	0	0	0	0	0	0
InputMouse#	0	0	0	0	0	0	0	0	0	0	0	0	0
InputMouse#	0	0	0	0	0	0	0	0	0	0	0	0	0
InputMouse#	0	0	0	0	0	0	0	0	0	0	0	0	0
CEP Normalize
Mouse	Isocortex	Striatum	Pallidum	Hypothalamus	Olfactory Areas	Cortical Subplate	Thalamus	Midbrain	Hippocampal Formation	Cerebellum	Pons	Medulla	Tracts
4157	2.41318	0.387702	0.582698	0	0.653136	0	1.21009	0.737466	0.891065	1.03781	1.19944	0.20505	0.603982
InputMouse#	#DIV/0!	#DIV/0!	#DIV/0!	#DIV/0!	#DIV/0!	#DIV/0!	#DIV/0!	#DIV/0!	#DIV/0!	#DIV/0!	#DIV/0!	#DIV/0!	#DIV/0!
InputMouse#	#DIV/0!	#DIV/0!	#DIV/0!	#DIV/0!	#DIV/0!	#DIV/0!	#DIV/0!	#DIV/0!	#DIV/0!	#DIV/0!	#DIV/0!	#DIV/0!	#DIV/0!
InputMouse#	#DIV/0!	#DIV/0!	#DIV/0!	#DIV/0!	#DIV/0!	#DIV/0!	#DIV/0!	#DIV/0!	#DIV/0!	#DIV/0!	#DIV/0!	#DIV/0!	#DIV/0!
InputMouse#	#DIV/0!	#DIV/0!	#DIV/0!	#DIV/0!	#DIV/0!	#DIV/0!	#DIV/0!	#DIV/0!	#DIV/0!	#DIV/0!	#DIV/0!	#DIV/0!	#DIV/0!
InputMouse#	#DIV/0!	#DIV/0!	#DIV/0!	#DIV/0!	#DIV/0!	#DIV/0!	#DIV/0!	#DIV/0!	#DIV/0!	#DIV/0!	#DIV/0!	#DIV/0!	#DIV/0!
InputMouse#	#DIV/0!	#DIV/0!	#DIV/0!	#DIV/0!	#DIV/0!	#DIV/0!	#DIV/0!	#DIV/0!	#DIV/0!	#DIV/0!	#DIV/0!	#DIV/0!	#DIV/0!
InputMouse#	#DIV/0!	#DIV/0!	#DIV/0!	#DIV/0!	#DIV/0!	#DIV/0!	#DIV/0!	#DIV/0!	#DIV/0!	#DIV/0!	#DIV/0!	#DIV/0!	#DIV/0!
InputMouse#	#DIV/0!	#DIV/0!	#DIV/0!	#DIV/0!	#DIV/0!	#DIV/0!	#DIV/0!	#DIV/0!	#DIV/0!	#DIV/0!	#DIV/0!	#DIV/0!	#DIV/0!
InputMouse#	#DIV/0!	#DIV/0!	#DIV/0!	#DIV/0!	#DIV/0!	#DIV/0!	#DIV/0!	#DIV/0!	#DIV/0!	#DIV/0!	#DIV/0!	#DIV/0!	#DIV/0!
Saline Total
Mouse	Isocortex	Striatum	Pallidum	Hypothalamus	Olfactory Areas	Cortical Subplate	Thalamus	Midbrain	Hippocampal Formation	Cerebellum	Pons	Medulla	Tracts
InputMouse#	0	0	0	0	0	0	0	0	0	0	0	0	0
InputMouse#	0	0	0	0	0	0	0	0	0	0	0	0	0
InputMouse#	0	0	0	0	0	0	0	0	0	0	0	0	0
InputMouse#	0	0	0	0	0	0	0	0	0	0	0	0	0
InputMouse#	0	0	0	0	0	0	0	0	0	0	0	0	0
InputMouse#	0	0	0	0	0	0	0	0	0	0	0	0	0
InputMouse#	0	0	0	0	0	0	0	0	0	0	0	0	0
InputMouse#	0	0	0	0	0	0	0	0	0	0	0	0	0
InputMouse#	0	0	0	0	0	0	0	0	0	0	0	0	0
InputMouse#	0	0	0	0	0	0	0	0	0	0	0	0	0
Saline Normalize
Mouse	Isocortex	Striatum	Pallidum	Hypothalamus	Olfactory Areas	Cortical Subplate	Thalamus	Midbrain	Hippocampal Formation	Cerebellum	Pons	Medulla	Tracts
InputMouse#	#DIV/0!	#DIV/0!	#DIV/0!	#DIV/0!	#DIV/0!	#DIV/0!	#DIV/0!	#DIV/0!	#DIV/0!	#DIV/0!	#DIV/0!	#DIV/0!	#DIV/0!
InputMouse#	#DIV/0!	#DIV/0!	#DIV/0!	#DIV/0!	#DIV/0!	#DIV/0!	#DIV/0!	#DIV/0!	#DIV/0!	#DIV/0!	#DIV/0!	#DIV/0!	#DIV/0!
InputMouse#	#DIV/0!	#DIV/0!	#DIV/0!	#DIV/0!	#DIV/0!	#DIV/0!	#DIV/0!	#DIV/0!	#DIV/0!	#DIV/0!	#DIV/0!	#DIV/0!	#DIV/0!
InputMouse#	#DIV/0!	#DIV/0!	#DIV/0!	#DIV/0!	#DIV/0!	#DIV/0!	#DIV/0!	#DIV/0!	#DIV/0!	#DIV/0!	#DIV/0!	#DIV/0!	#DIV/0!
InputMouse#	#DIV/0!	#DIV/0!	#DIV/0!	#DIV/0!	#DIV/0!	#DIV/0!	#DIV/0!	#DIV/0!	#DIV/0!	#DIV/0!	#DIV/0!	#DIV/0!	#DIV/0!
InputMouse#	#DIV/0!	#DIV/0!	#DIV/0!	#DIV/0!	#DIV/0!	#DIV/0!	#DIV/0!	#DIV/0!	#DIV/0!	#DIV/0!	#DIV/0!	#DIV/0!	#DIV/0!
InputMouse#	#DIV/0!	#DIV/0!	#DIV/0!	#DIV/0!	#DIV/0!	#DIV/0!	#DIV/0!	#DIV/0!	#DIV/0!	#DIV/0!	#DIV/0!	#DIV/0!	#DIV/0!
InputMouse#	#DIV/0!	#DIV/0!	#DIV/0!	#DIV/0!	#DIV/0!	#DIV/0!	#DIV/0!	#DIV/0!	#DIV/0!	#DIV/0!	#DIV/0!	#DIV/0!	#DIV/0!
InputMouse#	#DIV/0!	#DIV/0!	#DIV/0!	#DIV/0!	#DIV/0!	#DIV/0!	#DIV/0!	#DIV/0!	#DIV/0!	#DIV/0!	#DIV/0!	#DIV/0!	#DIV/0!
InputMouse#	#DIV/0!	#DIV/0!	#DIV/0!	#DIV/0!	#DIV/0!	#DIV/0!	#DIV/0!	#DIV/0!	#DIV/0!	#DIV/0!	#DIV/0!	#DIV/0!	#DIV/0!

## Sheet: ROI Areas
region	1	2	3	4	5	6	7	8	9	10	11	12	13	14	15	16	17	18	19	20	21	Area	% area of whole brain
ACA	0	0	0	0	0	0	0	0	0	0	0	0	0	0	0	0	607086	1268309	1585408	4621314	1553148	9635265	0.00903089
AI	772794	663381	595141	625243	1309747	1079035	1138887	1029161	915407	0	0	0	0	0	0	0	0	0	0	0	0	8128796	0.00761891
ECT	437615	123701	170710	93353	133596	119039	0	0	0	0	0	0	0	0	0	0	0	0	0	0	0	1078014	0.0010104
FRP	0	0	0	0	0	0	0	0	0	0	174518	123783	195141	205030	170384	157592	147470	0	0	0	0	1173918	0.00110028
GU	351304	281127	583078	408706	0	0	0	0	0	0	0	0	0	0	0	0	0	0	0	0	0	1624215	0.00152234
ILA2/3	0	0	0	0	0	0	0	0	0	0	0	0	0	0	0	0	0	0	1449710	0	0	1449710	0.00135878
MO	0	0	0	0	1702685	2150897	3411239	2828487	2826312	2523898	4062677	3739128	3633207	3963759	5044088	6327435	6877579	5645775	3821264	0	5032851	63591281	0.0596025
ORB	0	0	0	0	0	0	0	443491	733783	1660592	1700403	2094059	1665095	1224965	1214408	1412967	1896077	1554142	317514	925063	1105277	17947836	0.0168221
PL	0	0	0	0	0	0	0	0	0	0	0	0	0	0	0	0	0	986142	688732	1296823	316189	3287886	0.00308165
PTLp	0	0	0	0	0	733924	382064	236457	373750	353663	245130	266931	324482	406626	459980	0	0	0	0	0	0	3783007	0.00354572
RSP	0	0	0	0	0	0	139377	187393	215888	182761	171461	502100	524462	452408	434098	3339547	2900308	2730605	3110512	3041880	2862669	20795469	0.0194911
SS	7028454	7478400	7833130	6840313	6109786	5526247	3838522	4023561	3778753	4129794	2577401	2172317	2269434	2056699	728420	0	0	0	0	0	0	66391231	0.0622268
VIS	2008300	2193180	2310207	2347423	2646658	1936474	2564721	2311838	2463005	2474048	2159495	2319728	2276212	2159461	2403775	0	0	0	0	0	0	34574525	0.0324058
VISC	625292	496721	675723	1017304	0	0	0	0	0	0	0	0	0	0	0	0	0	0	0	0	0	2815040	0.00263847
CP	207598	1410080	2353556	3247716	3771131	3926625	4206074	4131148	3740528	3433262	3940452	3478332	3227643	3240821	2122405	943573	0	3	0	0	0	47380947	0.044409
LS	0	0	0	0	0	0	0	0	0	0	0	0	0	0	0	912604	1823704	1936620	2101223	666119	1544896	8985166	0.00842157
sAMY	0	0	0	351436	602795	1067214	1425385	1197149	1465501	1404897	1063794	0	0	0	0	0	0	0	0	0	0	8578171	0.0080401
STRv	0	121959	271694	420444	393403	354439	225731	860306	1857105	2225362	1804793	2538925	2816488	2412852	2368162	1775567	1737857	1122832	462535	0	416029	24186483	0.0226694
GP	0	0	0	0	205951	412947	823517	728650	710503	627535	633530	318802	144366	0	0	0	0	0	0	0	0	4605801	0.0043169
PALc	0	0	0	0	0	0	0	0	0	0	0	0	0	369773	1062031	1359608	898198	609733	432253	3	298280	5029879	0.00471438
PALm	0	0	0	0	0	0	0	0	0	0	0	0	90178	252076	256393	276204	371932	604495	996254	1889492	1181185	5918209	0.00554699
PALv	0	0	0	0	0	0	162853	751948	732786	811679	1130731	895401	621210	451843	309439	310256	457730	49524	5	8	0	6685413	0.00626607
LZ/ME	0	0	0	0	0	0	0	78187	369572	618585	717195	1563099	2394526	2753582	2977942	2868299	448396	498109	255	234986	291	15523024	0.0145493
MEZ	0	0	0	0	0	0	0	0	0	0	0	0	0	0	129789	455792	1985588	2156081	2060925	1167966	1910475	9866616	0.00924773
PVR	0	0	0	0	0	0	0	0	0	0	0	0	0	0	0	0	377764	1048638	1109455	796324	952227	4284408	0.00401567
PVZ	0	0	0	0	0	0	0	0	0	0	0	16478	20677	10880	0	0	158039	141265	694921	413721	741981	2197962	0.00206009
AOB-dark/ Nlot	0	0	0	0	0	0	0	244808	379451	329606	88110	0	131418	234123	214782	52226	0	0	0	0	0	1674524	0.00156949
AOB-light	0	0	0	0	0	0	0	0	0	0	0	0	246101	395043	362154	149355	0	0	0	0	0	1152653	0.00108035
AON	0	0	0	0	0	0	0	0	0	0	373776	417107	1000309	1685551	1814776	1651800	1026684	377273	163612	0	0	8510888	0.00797704
COA	366045	442079	946784	1307499	1432377	1409820	1519601	965542	517673	97530	0	0	0	0	0	0	0	0	0	0	0	9004950	0.00844011
MOB-dark	0	0	0	0	0	0	0	0	0	1082279	890785	2025677	2365091	2767330	4229201	5031714	3372353	3804486	1998575	452909	3547854	31568254	0.0295881
MOB-light	68134	67167	144668	77027	83552	94525	73435	51939	30137	1	1482859	1280821	3054267	2200554	1396599	1343427	4093679	2280786	3602978	2010102	2982837	26419494	0.0247623
PAA	630055	496214	282295	383496	0	0	0	0	0	0	0	0	0	0	0	0	0	0	0	0	0	1792060	0.00167965
PIR	1621931	2127757	2150898	2031051	2522399	1744653	1760915	784162	819508	1060051	517208	623580	565961	102591	99985	0	0	0	0	0	0	18532650	0.0173702
TR	315680	500421	161646	0	0	0	0	0	0	0	0	0	0	0	0	0	0	0	0	0	0	977747	0.000916418
TT	0	1	0	1	0	0	0	0	0	0	0	0	0	0	0	317364	728683	1112039	1186099	1057521	1781458	6183166	0.00579533
BLA	641838	876694	976988	1217850	686444	168773	132134	0	0	0	0	0	0	0	0	0	0	0	0	0	0	4700721	0.00440587
BMA	0	0	0	79173	446365	492062	368613	318371	137098	0	0	0	0	0	0	0	0	0	0	0	0	1841682	0.00172616
CLA	971445	312187	267389	205484	165532	175752	142277	146221	164710	121700	185682	255436	166801	203933	129189	0	0	0	0	0	0	3613738	0.00338707
EP	1704989	877289	759398	683368	712717	616107	211757	213860	296605	176738	247998	286321	286367	471247	348501	0	0	0	0	0	0	7893262	0.00739815
PA	0	69283	135212	220788	256419	311941	221420	206791	185383	119043	212598	0	0	0	0	0	0	0	0	0	0	1938878	0.00181726
DOR-pm	0	0	0	0	0	0	564472	1212138	522900	480829	1533717	2269025	2236455	2091928	2155487	2149087	2187839	2958952	3416169	3621261	3653001	31053260	0.0291054
DOR-sm	0	0	0	0	0	0	259700	965199	1848716	2308787	1724910	1268801	1283651	1360079	1357697	915234	818310	346263	231252	338420	324194	15351213	0.0143883
LA	251943	376072	371795	0	0	0	0	0	0	0	0	0	0	0	0	0	0	0	0	0	0	999810	0.000937097
MB-mot	0	0	0	0	0	0	0	0	250054	1338344	2852058	3491943	4301613	4851591	5572388	6840915	5817598	5327856	5061914	4567874	4764890	55039038	0.0515867
MB-sen	0	0	0	0	0	0	0	0	72211	1586034	1295920	2084477	2414805	2248286	2018892	1748137	1729673	1309876	1107115	1400829	1343574	20359829	0.0190828
MB-sta	0	0	0	0	0	0	0	0	0	84033	175746	427221	546745	502676	1	1	6	422333	1493857	1570200	380096	5602915	0.00525147
ENT	2371150	2177759	2302398	1879039	1781299	1097343	0	0	0	0	0	0	0	0	0	0	0	0	0	0	0	11608988	0.0108808
CA123_pyramidal/DG_granule	779023	471226	472917	730780	843898	973388	763783	689340	540699	427864	398432	312447	298302	300358	287394	276172	243756	175504	78405	0	58124	9121812	0.00854964
CA123 / DG	842105	1769956	2702294	2629416	3244803	3446159	3379021	2734075	2218187	1820374	1581021	1422223	1317029	1321202	1199689	1128971	837459	629904	618543	0	552115	35394546	0.0331744
PAR	0	0	0	0	0	452715	1075754	1	0	0	0	0	0	0	0	0	0	0	0	0	0	1528470	0.0014326
POST	0	0	0	0	0	0	174557	407448	522301	487312	418075	0	0	0	0	0	0	0	0	0	0	2009693	0.00188363
PRE	0	0	0	0	305836	309209	499941	899190	151661	0	0	0	0	0	0	0	0	0	0	0	0	2165837	0.00202998
SUB	662679	1025281	1102162	1801288	1448405	1090318	996407	580048	358041	324279	332809	309848	232181	199659	188001	98865	84728	49248	0	0	0	10884247	0.0102015
CBX-granular	1364576	1716464	2162494	2297351	2816766	2796349	2452293	2532060	2566265	2127303	2193316	2097796	2096242	2233060	2519246	2717856	2948750	3222863	3379268	3262620	3005335	52508273	0.0492147
CBX-molecular	1880993	2179983	2375023	3144757	3126796	2970070	2775958	2945340	3029724	2905084	2530473	2316860	2068787	2364221	2755301	3177859	3570351	3889909	3959854	3880878	3724227	61572448	0.0577103
DN	0	12	4	0	0	81861	320990	420643	384230	437038	509232	419423	447249	305563	467831	307793	52542	21	0	0	0	4154432	0.00389384
P-mot	0	0	0	0	0	0	0	0	0	0	719787	618336	1024524	1142918	1335175	2058612	2152062	1879900	1899138	2064385	2055098	16949935	0.0158867
P-sat	0	0	0	0	0	0	0	0	0	0	416803	524244	872838	1125621	1554310	1267930	1607534	1216142	698368	637195	844079	10765064	0.0100898
P-sen	0	0	0	0	0	0	0	207697	782493	1984643	952015	1362108	1058653	956841	597863	205169	190580	0	0	0	0	8298062	0.00777756
MY-mot	0	0	0	0	2	15	3	0	0	74215	2158868	3997814	4600244	5076795	4817589	5765550	5327479	4621471	2472296	2407463	3207521	44527325	0.0417343
MY-sat	0	0	0	0	0	4	2	0	0	0	1	2	8	2	1	14	2	1	668993	743397	486461	1898888	0.00177978
MY-sen	0	0	0	0	164864	664969	1111111	946157	1666597	2836956	2049029	2176166	1463195	1138508	779429	152942	289451	248216	320694	487499	275096	16770879	0.0157189
blue gray tracts	1071594	1266129	1257695	1480881	1930016	279155	302324	390779	982517	712019	937407	929882	3042318	750904	716261	659278	680240	903633	2990183	507036	2713219	24503470	0.0229665
light grey tracts	0	0	0	0	0	4269943	5579729	6550693	7725855	6520256	6827978	5915492	0	5281449	5531138	4568763	4474324	6874155	0	7985118	0	78104893	0.0732057
CBX-tracts	97788	148472	240140	415800	561965	28062	28122	860	70	16024	401	7790	685668	8877	9141	638	125	6467	573220	373	660805	3490808	0.00327185
CTX tracts	328424	376533	494751	368408	339588	319648	279433	124460	95327	74516	73013	61567	67752	80778	19412	916	2077	580	6770	1217	1001	3116171	0.00292071
HY-tracts	0	0	0	0	0	0	0	0	17	0	0	44778	233008	328959	339964	380312	1022946	616453	1138752	205298	1623202	5933689	0.0055615
MB-tracts	0	0	0	0	0	0	0	0	787015	230583	256522	584889	720653	571091	779512	587957	502269	826666	928858	144724	2483089	9403828	0.00881397
MY-tracts	0	0	82531	182756	234773	683	15309	5575	3265	59396	275648	398655	593320	426644	505370	306833	362757	455375	2742486	703285	2495068	9849729	0.0092319
P-tracts	0	0	0	0	0	0	0	7491	4491	48671	199327	217749	744656	242683	266257	89227	142325	319868	808580	328710	765086	4185121	0.00392261
TH-tracts	0	0	0	0	0	0	74815	173212	275530	288066	236999	248844	345246	352014	385936	353435	329084	256918	395249	252884	479203	4447435	0.00416847
ventricles	33819	59845	80906	232776	682515	704416	506580	291911	217962	227788	265748	291221	323692	450734	897070	1343931	460703	609266	1500845	4905747	876128	X	X
Total Area*	27401749	30045528	34182721	36488151	39980568	41100365	43402246	43531876	47501624	50605650	55030103	58426405	60714578	63283854	64435786	64443796	65283394	64485431	60772194	53684897	62122131	1066923047	1
