# Supplementary material for: Injection with Toxoplasma gondii protein affects neuron health and survival
Source: eLife. 2021 Jun 9;10:e67681. doi: 10.7554/eLife.67681 (PMC8270641; doi:10.7554/eLife.67681)
Supplement: Figure 2—source data 1. [file elife-67681-fig2-data1.xlsx]

## Sheet: 4146
	GFP+	GFP+NeuN	GFP+Calbindin	GFP+Calb+NeuN+	Calb+	NeuN+					GFP+	GFP+NeuN	GFP+Calbindin	GFP+Calb+NeuN+	Calb+	NeuN+					GFP+	GFP+NeuN	GFP+Calbindin	GFP+Calb+NeuN+	Calb+	NeuN+
4146_s2_s2_str	1	1	0	0
4146_s2_s1_ctx	4	4	1	1						Striatum										Cortex
4146_s2_s2_ctx	8	8	0	0						4146_s2_s2_str	1	1	0	0						4146_s2_s1_ctx	4	4	1	1
4146_s3_s1_str	1	1	0	0						4146_s3_s1_str	1	1	0	0						4146_s2_s2_ctx	8	8	0	0
4146_s3_s2_str	4	2	0	0						4146_s3_s2_str	4	2	0	0						4146_s3_s1_ctx	8	7	0	0
4146_s3_s1_ctx	8	7	0	0						4146_s4_s1_str	3	1	0	0						4146_s3_s2_ctx	5	4	0	0
4146_s3_s2_ctx	5	4	0	0						4146_s5_s1_str	1	1	0	0						4146_s3_s3_ctx	1	1	0	0
4146_s3_s3_ctx	1	1	0	0						4146_s6_s1_str	7	5	0	0						4146_s3_s4_ctx	2	1	0	0
4146_s3_s4_ctx	2	1	0	0						4146_s6_s2_str	1	1	0	0						4146_s3_s5_ctx	3	2	0	0
4146_s3_s5_ctx	3	2	0	0						4146_s6_s3_str	1	1	0	0						4146_s3_s6_ctx	4	4	1	1
4146_s3_s6_ctx	4	4	1	1						4146_s7_s1_str	2	2	0	0						4146_s3_s7_ctx	1	1	0	0
4146_s3_s7_ctx	1	1	0	0																4146_s3_s8_ctx	1	1	0	0
4146_s3_s8_ctx	1	1	0	0						sum	21	15	0	0						4146_s4_s1_ctx	16	10	1	0
4146_s4_s1_str	3	1	0	0										0						4146_s4_s2_ctx	9	6	1	1
4146_s4_s1_ctx	16	10	1	0																4146_s4_s3_ctx	1	1	0	0
4146_s4_s2_ctx	9	6	1	1																4146_s4_s4_ctx	1	1	0	0
4146_s4_s3_ctx	1	1	0	0																4146_s5_s1_ctx	1	1	1	1
4146_s4_s4_ctx	1	1	0	0																4146_s5_s2_ctx	1	1	1	1
4146_s5_s1_str	1	1	0	0																4146_s5_s3_ctx	3	3	0	0
4146_s5_s1_ctx	1	1	1	1																4146_s5_s4_ctx	2	2	0	0
4146_s5_s2_ctx	1	1	1	1																4146_s5_s5_ctx	3	3	0	0
4146_s5_s3_ctx	3	3	0	0																4146_s5_s6_ctx	2	2	0	0
4146_s5_s4_ctx	2	2	0	0																4146_s6_s1_ctx	8	8	0	0
4146_s5_s5_ctx	3	3	0	0																4146_s6_s2_ctx	1	1	1	1
4146_s5_s6_ctx	2	2	0	0																4146_s6_s3_ctx	5	3	0	0
4146_s6_s1_str	7	5	0	0																4146_s6_s4_ctx	10	8	0	0
4146_s6_s2_str	1	1	0	0																4146_s6_s5_ctx	6	6	0	0
4146_s6_s3_str	1	1	0	0																4146_s6_s6_ctx	5	4	0	0
4146_s6_s1_ctx	8	8	0	0																4146_s7_s1_ctx	7	6	1	1
4146_s6_s2_ctx	1	1	1	1																4146_s7_s2_ctx	1	1	0	0
4146_s6_s3_ctx	5	3	0	0																4146_s7_s3_ctx	1	1	0	0
4146_s6_s4_ctx	10	8	0	0																4146_s7_s4_ctx	11	11	2	2
4146_s6_s5_ctx	6	6	0	0																4146_s7_s5_ctx	8	7	0	0
4146_s6_s6_ctx	5	4	0	0																4146_s7_s6_ctx	1	1	0	0
4146_s7_s1_str	2	2	0	0																4146_s7_s7_ctx	2	2	0	0
4146_s7_s1_ctx	7	6	1	1																4146_s8_s1_ctx	1	1	0	0
4146_s7_s2_ctx	1	1	0	0																4146_s8_s2_ctx	1	1	0	0
4146_s7_s3_ctx	1	1	0	0																4146_s8_s3_ctx	3	3	0	0
4146_s7_s4_ctx	11	11	2	2																4146_s8_s4_ctx	5	3	0	0
4146_s7_s5_ctx	8	7	0	0																4146_s8_s5_ctx	22	18	0	0
4146_s7_s6_ctx	1	1	0	0																4146_s8_s6_ctx	3	2	0	0
4146_s7_s7_ctx	2	2	0	0																4146_s8_s7_ctx	6	5	0	0
4146_s8_s1_ctx	1	1	0	0																4146_s8_s8_ctx	1	1	0	0
4146_s8_s2_ctx	1	1	0	0																4146_s9_s1_ctx	7	7	0	0
4146_s8_s3_ctx	3	3	0	0																4146_s9_s2_ctx	11	10	1	1
4146_s8_s4_ctx	5	3	0	0																4146_s9_s3_ctx	4	4	0	0
4146_s8_s5_ctx	22	18	0	0																4146_s9_s4_ctx	9	6	1	1
4146_s8_s6_ctx	3	2	0	0																4146_s10_s1_ctx	6	1	0	0
4146_s8_s7_ctx	6	5	0	0																4146_s10_s2_ctx	10	9	0	0
4146_s8_s8_ctx	1	1	0	0																4146_s11_s1_ctx	21	18	1	1
4146_s9_s1_ctx	7	7	0	0																4146_s11_s2_ctx	7	6	0	0
4146_s9_s2_ctx	11	10	1	1
4146_s9_s3_ctx	4	4	0	0																Sum	259	217	13	12
4146_s9_s4_ctx	9	6	1	1																				5.52995
4146_s10_s1_ctx	6	1	0	0
4146_s10_s2_ctx	10	9	0	0
4146_s11_s1_ctx	21	18	1	1
4146_s11_s2_ctx	7	6	0	0

## Sheet: 4133
	GFP+	GFP+NeuN	GFP+Calbindin	GFP+Calb+NeuN+	Calb+	NeuN+					GFP+	GFP+NeuN	GFP+Calbindin	GFP+Calb+NeuN+	Calb+	NeuN+					GFP+	GFP+NeuN	GFP+Calbindin	GFP+Calb+NeuN+	Calb+	NeuN+
4133_s2_s1_ctx	18	12	2	2
4133_s2_s2_ctx	26	26	1	1						Striatum										Cortex
4133_s2_s3_ctx	5	5	0	0						4133_s3_s1_str	1	1	0	0						4133_s2_s1_ctx	18	12	2	2
4133_s2_s4_ctx	25	19	1	1						4133_s3_s2_str	2	2	0	0						4133_s2_s2_ctx	26	26	1	1
4133_s2_s5_ctx	6	4	0	0						4133_s4_s1_str	4	4	0	0						4133_s2_s3_ctx	5	5	0	0
4133_s3_s1_str	1	1	0	0						4133_s4_s2_str	4	0	1	0						4133_s2_s4_ctx	25	19	1	1
4133_s3_s2_str	2	2	0	0						4133_s4_s3_str	5	5	0	0						4133_s2_s5_ctx	6	4	0	0
4133_s3_s1_ctx	7	2	0	0						4133_s5_s1_str	19	13	3	9						4133_s3_s1_ctx	7	2	0	0
4133_s3_s2_ctx	11	8	0	0						4133_s5_s2_str	2	1	0	0						4133_s3_s2_ctx	11	8	0	0
4133_s3_s3_ctx	9	7	1	0						4133_s5_s3_str	3	1	0	0						4133_s3_s3_ctx	9	7	1	0
4133_s4_s1_str	4	4	0	0						4133_s5_s4_str	29	19	0	0						4133_s4_s1_ctx	15	14	0	0
4133_s4_s2_str	4	0	1	0						4133_s5_s5_str	10	8	2	2						4133_s4_s2_ctx	15	14	1	0
4133_s4_s3_str	5	5	0	0						4133_s6_s1_str	1	1	0	0						4133_s4_s3_ctx	12	11	0	0
4133_s4_s1_ctx	15	14	0	0						4133_s6_s2_str	5	5	0	0						4133_s4_s4_ctx	3	3	0	0
4133_s4_s2_ctx	15	14	1	0						4133_s6_s3_str	22	20	0	0						4133_s5_s1_ctx	8	7	0	0
4133_s4_s3_ctx	12	11	0	0						4133_s6_s4_str	2	2	1	1						4133_s5_s2_ctx	25	22	1	1
4133_s4_s4_ctx	3	3	0	0						4133_s7_s1_str	6	3	1	0						4133_s5_s3_ctx	8	8	1	1
4133_s5_s1_str	19	13	3	9						4133_s7_s2_str	16	10	0	0						4133_s5_s4_ctx	20	20	0	0
4133_s5_s2_str	2	1	0	0						4133_s7_s3_str	14	13	0	0						4133_s5_s5_ctx	4	3	0	0
4133_s5_s3_str	3	1	0	0						4133_s7_s4_str	6	5	0	0						4133_s5_s6_ctx	10	9	0	0
4133_s5_s4_str	29	19	0	0						4133_s8_s1_str	10	5	1	1						4133_s5_s7_ctx	10	7	0	0
4133_s5_s5_str	10	8	2	2						4133_s8_s2_str	9	6	2	2						4133_s6_s1_ctx	6	3	0	0
4133_s5_s1_ctx	8	7	0	0						4133_s8_s3_str	5	5	1	1						4133_s6_s2_ctx	9	8	0	0
4133_s5_s2_ctx	25	22	1	1						4133_s8_s4_str	31	28	3	2						4133_s6_s3_ctx	2	2	0	0
4133_s5_s3_ctx	8	8	1	1						4133_s8_s5_str	4	4	2	2						4133_s6_s4_ctx	11	10	1	1
4133_s5_s4_ctx	20	20	0	0																4133_s6_s5_ctx	7	6	0	0
4133_s5_s5_ctx	4	3	0	0						sum	210	161	17	20						4133_s6_s6_ctx	16	14	1	1
4133_s5_s6_ctx	10	9	0	0										12.4224						4133_s7_s1_ctx	7	7	0	0
4133_s5_s7_ctx	10	7	0	0																4133_s7_s2_ctx	7	4	0	0
4133_s6_s1_str	1	1	0	0																4133_s7_s3_ctx	28	26	0	0
4133_s6_s2_str	5	5	0	0																4133_s7_s4_ctx	24	15	0	0
4133_s6_s3_str	22	20	0	0																4133_s7_s5_ctx	27	22	0	0
4133_s6_s4_str	2	2	1	1																4133_s7_s6_ctx	34	27	0	0
4133_s6_s1_ctx	6	3	0	0																4133_s7_s7_ctx	6	3	0	0
4133_s6_s2_ctx	9	8	0	0																4133_s7_s8_ctx	22	16	1	1
4133_s6_s3_ctx	2	2	0	0																4133_s8_s1_ctx	15	9	0	0
4133_s6_s4_ctx	11	10	1	1																4133_s8_s2_ctx	11	10	0	0
4133_s6_s5_ctx	7	6	0	0																4133_s8_s3_ctx	11	11	1	1
4133_s6_s6_ctx	16	14	1	1																4133_s8_s4_ctx	4	4	0	0
4133_s7_s1_str	6	3	1	0																4133_s8_s5_ctx	3	3	0	0
4133_s7_s2_str	16	10	0	0																4133_s9_s1_str	4	2	1	1
4133_s7_s3_str	14	13	0	0																4133_s9_s1_ctx	11	7	0	0
4133_s7_s4_str	6	5	0	0																4133_s9_s2_ctx	7	6	0	0
4133_s7_s1_ctx	7	7	0	0																4133_s9_s3_ctx	23	21	1	1
4133_s7_s2_ctx	7	4	0	0																4133_s9_s4_ctx	6	4	0	0
4133_s7_s3_ctx	28	26	0	0																4133_s9_s5_ctx	15	12	0	0
4133_s7_s4_ctx	24	15	0	0																4133_s10_s1_ctx	5	4	0	0
4133_s7_s5_ctx	27	22	0	0																4133_s10_s2_ctx	20	19	0	0
4133_s7_s6_ctx	34	27	0	0
4133_s7_s7_ctx	6	3	0	0																sum	578	476	14	12
4133_s7_s8_ctx	22	16	1	1																				2.52101
4133_s8_s1_str	10	5	1	1
4133_s8_s2_str	9	6	2	2
4133_s8_s3_str	5	5	1	1
4133_s8_s4_str	31	28	3	2
4133_s8_s5_str	4	4	2	2
4133_s8_s1_ctx	15	9	0	0
4133_s8_s2_ctx	11	10	0	0
4133_s8_s3_ctx	11	11	1	1
4133_s8_s4_ctx	4	4	0	0
4133_s8_s5_ctx	3	3	0	0
4133_s9_s1_str	4	2	1	1
4133_s9_s1_ctx	11	7	0	0
4133_s9_s2_ctx	7	6	0	0
4133_s9_s3_ctx	23	21	1	1
4133_s9_s4_ctx	6	4	0	0
4133_s9_s5_ctx	15	12	0	0
4133_s10_s1_ctx	5	4	0	0
4133_s10_s2_ctx	20	19	0	0

## Sheet: 4148
	GFP+	GFP+NeuN	GFP+Calbindin	GFP+Calb+NeuN+	Calb+	NeuN+					GFP+	GFP+NeuN	GFP+Calbindin	GFP+Calb+NeuN+	Calb+	NeuN+					GFP+	GFP+NeuN	GFP+Calbindin	GFP+Calb+NeuN+	Calb+	NeuN+
4148_s2_s1_ctx	1	1	1	1
4148_s2_s2_ctx	17	13	2	2						Striatum										Cortex
4148_s2_s3_ctx	5	3	0	0						4148_s5_s1_str	0	0	0	0						4148_s2_s1_ctx	1	1	1	1
4148_s3_s1_ctx	4	2	0	0						4148_s5_s2_str	0	0	0	0						4148_s2_s2_ctx	17	13	2	2
4148_s3_s2_ctx	2	2	0	0						4148_s5_s3_str	0	0	0	0						4148_s2_s3_ctx	5	3	0	0
4148_s3_s3_ctx	4	2	0	0						4148_s6_s1_str	2	0	0	0						4148_s3_s1_ctx	4	2	0	0
4148_s3_s4_ctx	5	4	1	1						4148_s6_s2_str	1	0	0	0						4148_s3_s2_ctx	2	2	0	0
4148_s4_s1_ctx	4	2	0	0						4148_s6_s3_str	0	0	0	0						4148_s3_s3_ctx	4	2	0	0
4148_s4_s2_ctx	1	1	0	0						4148_s6_s4_str	1	0	0	0						4148_s3_s4_ctx	5	4	1	1
4148_s5_s1_str	0	0	0	0						4148_s7_s1_str	1	0	0	0						4148_s4_s1_ctx	4	2	0	0
4148_s5_s2_str	0	0	0	0						4148_s7_s2_str	2	1	0	0						4148_s4_s2_ctx	1	1	0	0
4148_s5_s3_str	0	0	0	0						4148_s7_s3_str	1	0	0	0						4148_s5_s1_ctx	4	2	0	0
4148_s5_s1_ctx	4	2	0	0						4148_s7_s4_str	1	0	0	0						4148_s5_s2_ctx	0	0	0	0
4148_s5_s2_ctx	0	0	0	0						4148_s8_s1_str	1	0	0	0						4148_s5_s3_ctx	0	0	0	0
4148_s5_s3_ctx	0	0	0	0						4148_s8_s2_str	1	1	0	0						4148_s5_s4_ctx	0	0	0	0
4148_s5_s4_ctx	0	0	0	0						4148_s8_s3_str	3	1	0	0						4148_s5_s5_ctx	3	2	0	0
4148_s5_s5_ctx	3	2	0	0						4148_s8_s4_str	0	0	0	0						4148_s6_s1_ctx	1	0	0	0
4148_s6_s1_str	2	0	0	0						4148_s9_s1_str	0	0	0	0						4148_s6_s2_ctx	0	0	0	0
4148_s6_s2_str	1	0	0	0						4148_s9_s2_str	0	0	0	0						4148_s6_s3_ctx	0	0	0	0
4148_s6_s3_str	0	0	0	0						4148_s9_s3_str	0	0	0	0						4148_s6_s4_ctx	0	0	0	0
4148_s6_s4_str	1	0	0	0						4148_s10_s1_str	0	0	0	0						4148_s6_s5_ctx	1	1	0	0
4148_s6_s1_ctx	1	0	0	0																4148_s7_s1_ctx	0	0	0	0
4148_s6_s2_ctx	0	0	0	0						sum	14	3	0	0						4148_s7_s2_ctx	0	0	0	0
4148_s6_s3_ctx	0	0	0	0										0						4148_s7_s3_ctx	0	0	0	0
4148_s6_s4_ctx	0	0	0	0																4148_s7_s4_ctx	0	0	0	0
4148_s6_s5_ctx	1	1	0	0																4148_s7_s5_ctx	0	0	0	0
4148_s7_s1_str	1	0	0	0																4148_s8_s1_ctx	0	0	0	0
4148_s7_s2_str	2	1	0	0																4148_s8_s2_ctx	0	0	0	0
4148_s7_s3_str	1	0	0	0																4148_s8_s3_ctx	0	0	0	0
4148_s7_s4_str	1	0	0	0																4148_s8_s4_ctx	0	0	0	0
4148_s7_s1_ctx	0	0	0	0																4148_s8_s5_ctx	0	0	0	0
4148_s7_s2_ctx	0	0	0	0																4148_s9_s1_ctx	0	0	0	0
4148_s7_s3_ctx	0	0	0	0																4148_s9_s2_ctx	0	0	0	0
4148_s7_s4_ctx	0	0	0	0																4148_s9_s3_ctx	11	7	0	0
4148_s7_s5_ctx	0	0	0	0																4148_s9_s4_ctx	2	2	0	0
4148_s8_s1_str	1	0	0	0																4148_s9_s5_ctx	1	0	0	0
4148_s8_s2_str	1	1	0	0																4148_s10_s1_ctx	3	1	0	0
4148_s8_s3_str	3	1	0	0																4148_s10_s2_ctx	4	2	0	0
4148_s8_s4_str	0	0	0	0																4148_s10_s3_ctx	15	11	0	0
4148_s8_s1_ctx	0	0	0	0																4148_s10_s4_ctx	11	9	0	0
4148_s8_s2_ctx	0	0	0	0																4148_s10_s5_ctx	0	0	0	0
4148_s8_s3_ctx	0	0	0	0
4148_s8_s4_ctx	0	0	0	0																sum	99	67	4	4
4148_s8_s5_ctx	0	0	0	0																				5.97015
4148_s9_s1_str	0	0	0	0
4148_s9_s2_str	0	0	0	0
4148_s9_s3_str	0	0	0	0
4148_s9_s1_ctx	0	0	0	0
4148_s9_s2_ctx	0	0	0	0
4148_s9_s3_ctx	11	7	0	0
4148_s9_s4_ctx	2	2	0	0
4148_s9_s5_ctx	1	0	0	0
4148_s10_s1_str	0	0	0	0
4148_s10_s1_ctx	3	1	0	0
4148_s10_s2_ctx	4	2	0	0
4148_s10_s3_ctx	15	11	0	0
4148_s10_s4_ctx	11	9	0	0
4148_s10_s5_ctx	0	0	0	0

## Sheet: 4144
	GFP+	GFP+NeuN	GFP+Calbindin	GFP+Calb+NeuN+	Calb+	NeuN+					GFP+	GFP+NeuN	GFP+Calbindin	GFP+Calb+NeuN+	Calb+	NeuN+					GFP+	GFP+NeuN	GFP+Calbindin	GFP+Calb+NeuN+	Calb+	NeuN+
4148_s1_s1_ctx	6	6	0	0
4148_s1_s2_ctx	3	3	0	0						Striatum										Cortex
4148_s1_s3_ctx	3	1	0	0						4148_s3_s1_str	3	3	0	0						4148_s1_s1_ctx	6	6	0	0
4148_s1_s4_ctx	1	1	0	0						4148_s3_s2_str	0	0	0	0						4148_s1_s2_ctx	3	3	0	0
4148_s1_s5_ctx	13	9	0	0						4148_s3_s3_str	11	8	0	0						4148_s1_s3_ctx	3	1	0	0
4148_s2_s1_ctx	7	5	0	0						4148_s3_s4_str	1	1	0	0						4148_s1_s4_ctx	1	1	0	0
4148_s2_s2_ctx	1	1	0	0						4148_s4_s1_str	0	0	0	0						4148_s1_s5_ctx	13	9	0	0
4148_s2_s3_ctx	7	3	1	1						4148_s4_s2_str	4	2	0	0						4148_s2_s1_ctx	7	5	0	0
4148_s2_s4_ctx	2	2	0	0						4148_s4_s3_str	0	0	0	0						4148_s2_s2_ctx	1	1	0	0
4148_s2_s5_ctx	4	4	0	0						4148_s4_s4_str	7	4	0	0						4148_s2_s3_ctx	7	3	1	1
4148_s3_s1_str	3	3	0	0						4148_s5_s1_str	2	2	0	0						4148_s2_s4_ctx	2	2	0	0
4148_s3_s2_str	0	0	0	0						4148_s5_s2_str	0	0	0	0						4148_s2_s5_ctx	4	4	0	0
4148_s3_s3_str	11	8	0	0						4148_s5_s3_str	4	3	0	0						4148_s3_s1_ctx	11	9	0	0
4148_s3_s4_str	1	1	0	0						4148_s5_s4_str	0	0	0	0						4148_s3_s2_ctx	7	7	0	0
4148_s3_s1_ctx	11	9	0	0						4148_s6_s1_str	2	1	1	1						4148_s3_s3_ctx	9	6	0	0
4148_s3_s2_ctx	7	7	0	0						4148_s6_s2_str	3	2	0	0						4148_s3_s4_ctx	5	5	0	0
4148_s3_s3_ctx	9	6	0	0						4148_s6_s3_str	2	1	0	0						4148_s3_s5_ctx	2	2	0	0
4148_s3_s4_ctx	5	5	0	0						4148_s6_s4_str	3	1	1	1						4148_s4_s1_ctx	8	5	4	4
4148_s3_s5_ctx	2	2	0	0						4148_s6_s5_str	7	6	1	1						4148_s4_s2_ctx	14	9	0	0
4148_s4_s1_str	0	0	0	0						4148_s7_s1_str	2	0	0	0						4148_s4_s3_ctx	5	4	0	0
4148_s4_s2_str	4	2	0	0						4148_s7_s2_str	0	0	0	0						4148_s4_s4_ctx	12	9	0	0
4148_s4_s3_str	0	0	0	0						4148_s7_s3_str	1	0	0	0						4148_s4_s5_ctx	10	5	0	0
4148_s4_s4_str	7	4	0	0						4148_s7_s4_str	0	0	0	0						4148_s4_s6_ctx	7	6	0	0
4148_s4_s1_ctx	8	5	4	4						4148_s8_s1_str	2	2	0	0						4148_s5_s1_ctx	8	8	2	2
4148_s4_s2_ctx	14	9	0	0						4148_s8_s2_str	3	3	0	0						4148_s5_s2_ctx	11	8	0	0
4148_s4_s3_ctx	5	4	0	0						4148_s8_s3_str	3	3	2	2						4148_s5_s3_ctx	21	19	2	2
4148_s4_s4_ctx	12	9	0	0						4148_s9_s1_str	5	4	0	0						4148_s5_s4_ctx	10	8	0	0
4148_s4_s5_ctx	10	5	0	0						4148_s9_s2_str	0	0	0	0						4148_s5_s5_ctx	15	12	0	0
4148_s4_s6_ctx	7	6	0	0						4148_s9_s3_str	0	0	0	0						4148_s5_s6_ctx	10	7	0	0
4148_s5_s1_str	2	2	0	0						4148_s9_s4_str	0	0	0	0						4148_s5_s7_ctx	4	4	0	0
4148_s5_s2_str	0	0	0	0						4148_s10_s1_str	1	0	0	0						4148_s8_s7_ctx	4	3	0	0
4148_s5_s3_str	4	3	0	0						4148_s10_s2_str	0	0	0	0						4148_s6_s1_ctx	27	15	1	1
4148_s5_s4_str	0	0	0	0																4148_s6_s2_ctx	25	13	1	1
4148_s5_s1_ctx	8	8	2	2						sum	66	46	5	5						4148_s6_s3_ctx	2	2	1	1
4148_s5_s2_ctx	11	8	0	0										10.8696						4148_s6_s4_ctx	5	5	0	0
4148_s5_s3_ctx	21	19	2	2																4148_s7_s1_ctx	30	24	2	2
4148_s5_s4_ctx	10	8	0	0																4148_s7_s2_ctx	25	18	0	0
4148_s5_s5_ctx	15	12	0	0																4148_s7_s3_ctx	13	10	0	0
4148_s5_s6_ctx	10	7	0	0																4148_s7_s4_ctx	4	4	0	0
4148_s5_s7_ctx	4	4	0	0																4148_s7_s5_ctx	10	8	1	1
4148_s8_s7_ctx	4	3	0	0																4148_s7_s6_ctx	3	2	0	0
4148_s6_s1_str	2	1	1	1																4148_s8_s1_ctx	10	6	1	1
4148_s6_s2_str	3	2	0	0																4148_s8_s2_ctx	13	3	0	0
4148_s6_s3_str	2	1	0	0																4148_s8_s3_ctx	15	5	0	0
4148_s6_s4_str	3	1	1	1																4148_s8_s4_ctx	5	3	0	0
4148_s6_s5_str	7	6	1	1																4148_s8_s5_ctx	7	7	1	1
4148_s6_s1_ctx	27	15	1	1																4148_s8_s6_ctx	4	4	1	1
4148_s6_s2_ctx	25	13	1	1																4148_s8_s7_ctx	5	4	0	0
4148_s6_s3_ctx	2	2	1	1																4148_s9_s1_ctx	6	6	0	0
4148_s6_s4_ctx	5	5	0	0																4148_s9_s2_ctx	5	4	0	0
4148_s7_s1_str	2	0	0	0																4148_s9_s3_ctx	10	7	1	1
4148_s7_s2_str	0	0	0	0																4148_s9_s4_ctx	7	7	0	0
4148_s7_s3_str	1	0	0	0																4148_s9_s5_ctx	11	7	0	0
4148_s7_s4_str	0	0	0	0																4148_s9_s6_ctx	5	5	0	0
4148_s7_s1_ctx	30	24	2	2																4148_s10_s1_ctx	6	4	0	0
4148_s7_s2_ctx	25	18	0	0																4148_s10_s2_ctx	7	5	0	0
4148_s7_s3_ctx	13	10	0	0																4148_s10_s3_ctx	3	2	0	0
4148_s7_s4_ctx	4	4	0	0																4148_s10_s4_ctx	5	4	0	0
4148_s7_s5_ctx	10	8	1	1																4148_s10_s5_ctx	4	3	0	0
4148_s7_s6_ctx	3	2	0	0																4148_s10_s6_ctx	11	9	0	0
4148_s8_s1_str	2	2	0	0
4148_s8_s2_str	3	3	0	0																sum	503	367	19	19
4148_s8_s3_str	3	3	2	2																				5.17711
4148_s8_s1_ctx	10	6	1	1			cyst
4148_s8_s2_ctx	13	3	0	0
4148_s8_s3_ctx	15	5	0	0
4148_s8_s4_ctx	5	3	0	0
4148_s8_s5_ctx	7	7	1	1
4148_s8_s6_ctx	4	4	1	1
4148_s8_s7_ctx	5	4	0	0
4148_s9_s1_str	5	4	0	0
4148_s9_s2_str	0	0	0	0
4148_s9_s3_str	0	0	0	0
4148_s9_s4_str	0	0	0	0
4148_s9_s1_ctx	6	6	0	0
4148_s9_s2_ctx	5	4	0	0
4148_s9_s3_ctx	10	7	1	1
4148_s9_s4_ctx	7	7	0	0
4148_s9_s5_ctx	11	7	0	0
4148_s9_s6_ctx	5	5	0	0
4148_s10_s1_str	1	0	0	0
4148_s10_s2_str	0	0	0	0
4148_s10_s1_ctx	6	4	0	0
4148_s10_s2_ctx	7	5	0	0
4148_s10_s3_ctx	3	2	0	0
4148_s10_s4_ctx	5	4	0	0
4148_s10_s5_ctx	4	3	0	0
4148_s10_s6_ctx	11	9	0	0

## Sheet: 4147
	GFP+	GFP+NeuN	GFP+Calbindin	GFP+Calb+NeuN+	Calb+	NeuN+					GFP+	GFP+NeuN	GFP+Calbindin	GFP+Calb+NeuN+	Calb+	NeuN+					GFP+	GFP+NeuN	GFP+Calbindin	GFP+Calb+NeuN+	Calb+	NeuN+
4147_s1_s1_ctx	1	1	0	0
4147_s1_s2_ctx	2	2	0	0						Striatum										Cortex
4147_s1_s3_ctx	0	0	0	0						4147_s3_s1_str	0	0	0	0						4147_s1_s1_ctx	1	1	0	0
4147_s3_s1_str	0	0	0	0						4147_s3_s2_str	3	3	0	0						4147_s1_s2_ctx	2	2	0	0
4147_s3_s2_str	3	3	0	0						4147_s3_s3_str	0	0	0	0						4147_s1_s3_ctx	0	0	0	0
4147_s3_s3_str	0	0	0	0						4147_s3_s1_ctx	2	1	0	0						4147_s3_s1_ctx	2	1	0	0
4147_s3_s1_ctx	2	1	0	0						4147_s3_s2_ctx	1	1	0	0						4147_s3_s2_ctx	1	1	0	0
4147_s3_s2_ctx	1	1	0	0						4147_s3_s3_ctx	0	0	0	0						4147_s3_s3_ctx	0	0	0	0
4147_s3_s3_ctx	0	0	0	0						4147_s3_s4_ctx	0	0	0	0						4147_s3_s4_ctx	0	0	0	0
4147_s3_s4_ctx	0	0	0	0						4147_s5_s1_str	0	0	0	0						4147_s3_s1_ctx	2	1	0	0
4147_s3_s1_ctx	2	1	0	0						4147_s5_s2_str	0	0	0	0						4147_s3_s2_ctx	1	1	0	0
4147_s3_s2_ctx	1	1	0	0						4147_s5_s3_str	0	0	0	0						4147_s3_s3_ctx	0	0	0	0
4147_s3_s3_ctx	0	0	0	0						4147_s5_s4_str	1	0	0	0						4147_s3_s4_ctx	0	0	0	0
4147_s3_s4_ctx	0	0	0	0						4147_s6_s1_str	0	0	0	0						4147_s4_s1_ctx	0	0	0	0
4147_s4_s1_ctx	0	0	0	0						4147_s6_s2_str	0	0	0	0						4147_s4_s2_ctx	1	0	0	0
4147_s4_s2_ctx	1	0	0	0						4147_s6_s3_str	0	0	0	0						4147_s4_s3_ctx	0	0	0	0
4147_s4_s3_ctx	0	0	0	0						4147_s6_s4_str	0	0	0	0						4147_s4_s4_ctx	0	0	0	0
4147_s4_s4_ctx	0	0	0	0						4147_s6_s5_str	0	0	0	0						4147_s4_s5_ctx	1	1	0	0
4147_s4_s5_ctx	1	1	0	0			cyst			4147_s7_s1_str	0	0	0	0						4147_s5_s1_ctx	0	0	0	0
4147_s5_s1_str	0	0	0	0						4147_s7_s2_str	0	0	0	0						4147_s5_s2_ctx	0	0	0	0
4147_s5_s2_str	0	0	0	0						4147_s7_s3_str	0	0	0	0						4147_s5_s3_ctx	1	0	0	0
4147_s5_s3_str	0	0	0	0						4147_s7_s4_str	0	0	0	0						4147_s5_s4_ctx	0	0	0	0
4147_s5_s4_str	1	0	0	0						4147_s7_s5_str	1	0	0	0						4147_s5_s5_ctx	0	0	0	0
4147_s5_s1_ctx	0	0	0	0						4147_s8_s1_str	1	0	0	0						4147_s5_s6_ctx	0	0	0	0
4147_s5_s2_ctx	0	0	0	0						4147_s8_s2_str	0	0	0	0						4147_s6_s1_ctx	0	0	0	0
4147_s5_s3_ctx	1	0	0	0						4147_s8_s3_str	0	0	0	0						4147_s6_s2_ctx	0	0	0	0
4147_s5_s4_ctx	0	0	0	0						4147_s8_s4_str	0	0	0	0						4147_s6_s3_ctx	0	0	0	0
4147_s5_s5_ctx	0	0	0	0						4147_s9_s1_str	0	0	0	0						4147_s6_s4_ctx	0	0	0	0
4147_s5_s6_ctx	0	0	0	0						4147_s9_s2_str	0	0	0	0						4147_s6_s5_ctx	1	0	0	0
4147_s6_s1_str	0	0	0	0						4147_s9_s3_str	0	0	0	0						4147_s6_s6_ctx	0	0	0	0
4147_s6_s2_str	0	0	0	0						4147_s9_s4_str	1	0	0	0						4147_s7_s1_ctx	1	0	0	0
4147_s6_s3_str	0	0	0	0						4147_s10_s1_str	0	0	0	0						4147_s7_s2_ctx	0	0	0	0
4147_s6_s4_str	0	0	0	0						4147_s10_s2_str	0	0	0	0						4147_s7_s3_ctx	4	3	0	0
4147_s6_s5_str	0	0	0	0						4147_s10_s3_str	0	0	0	0						4147_s7_s4_ctx	1	1	0	0
4147_s6_s1_ctx	0	0	0	0																4147_s7_s5_ctx	3	2	0	0
4147_s6_s2_ctx	0	0	0	0						sum	10	5	0	0						4147_s7_s6_ctx	0	0	0	0
4147_s6_s3_ctx	0	0	0	0										0						4147_s8_s1_ctx	5	4	0	0
4147_s6_s4_ctx	0	0	0	0																4147_s8_s2_ctx	1	1	0	0
4147_s6_s5_ctx	1	0	0	0																4147_s8_s3_ctx	0	0	0	0
4147_s6_s6_ctx	0	0	0	0																4147_s8_s4_ctx	2	2	1	1
4147_s7_s1_str	0	0	0	0																4147_s8_s5_ctx	0	0	0	0
4147_s7_s2_str	0	0	0	0																4147_s8_s6_ctx	0	0	0	0
4147_s7_s3_str	0	0	0	0																4147_s9_s1_ctx	0	0	0	0
4147_s7_s4_str	0	0	0	0																4147_s9_s2_ctx	0	0	0	0
4147_s7_s5_str	1	0	0	0																4147_s9_s3_ctx	0	0	0	0
4147_s7_s1_ctx	1	0	0	0																4147_s9_s4_ctx	1	1	0	0
4147_s7_s2_ctx	0	0	0	0																4147_s9_s5_ctx	1	1	0	0
4147_s7_s3_ctx	4	3	0	0																4147_s9_s6_ctx	0	0	0	0
4147_s7_s4_ctx	1	1	0	0																4147_s10_s1_ctx	0	0	0	0
4147_s7_s5_ctx	3	2	0	0																4147_s10_s2_ctx	0	0	0	0
4147_s7_s6_ctx	0	0	0	0																4147_s10_s3_ctx	0	0	0	0
4147_s8_s1_str	1	0	0	0																4147_s10_s4_ctx	0	0	0	0
4147_s8_s2_str	0	0	0	0
4147_s8_s3_str	0	0	0	0																sum	32	23	1	1
4147_s8_s4_str	0	0	0	0																				4.34783
4147_s8_s1_ctx	5	4	0	0
4147_s8_s2_ctx	1	1	0	0
4147_s8_s3_ctx	0	0	0	0
4147_s8_s4_ctx	2	2	1	1
4147_s8_s5_ctx	0	0	0	0
4147_s8_s6_ctx	0	0	0	0
4147_s9_s1_str	0	0	0	0
4147_s9_s2_str	0	0	0	0
4147_s9_s3_str	0	0	0	0
4147_s9_s4_str	1	0	0	0
4147_s9_s1_ctx	0	0	0	0
4147_s9_s2_ctx	0	0	0	0
4147_s9_s3_ctx	0	0	0	0
4147_s9_s4_ctx	1	1	0	0
4147_s9_s5_ctx	1	1	0	0
4147_s9_s6_ctx	0	0	0	0
4147_s10_s1_str	0	0	0	0
4147_s10_s2_str	0	0	0	0
4147_s10_s3_str	0	0	0	0
4147_s10_s1_ctx	0	0	0	0
4147_s10_s2_ctx	0	0	0	0
4147_s10_s3_ctx	0	0	0	0
4147_s10_s4_ctx	0	0	0	0

## Sheet: 4139
	GFP+	GFP+NeuN	GFP+Calbindin	GFP+Calb+NeuN+	Calb+	NeuN+					GFP+	GFP+NeuN	GFP+Calbindin	GFP+Calb+NeuN+	Calb+	NeuN+					GFP+	GFP+NeuN	GFP+Calbindin	GFP+Calb+NeuN+	Calb+	NeuN+
4139_s2_s1_str	0	0	0	0
4139_s2_s2_str	0	0	0	0						Striatum										Cortex
4139_s2_s1_ctx	2	2	0	0						4139_s2_s1_str	0	0	0	0						4139_s2_s1_ctx	2	2	0	0
4139_s2_s2_ctx	4	1	0	0						4139_s2_s2_str	0	0	0	0						4139_s2_s2_ctx	4	1	0	0
4139_s2_s3_ctx	4	0	0	0						4139_s3_s1_str	0	0	0	0						4139_s2_s3_ctx	4	0	0	0
4139_s2_s4_ctx	0	0	0	0						4139_s3_s2_str	1	1	0	0						4139_s2_s4_ctx	0	0	0	0
4139_s3_s1_str	0	0	0	0						4139_s3_s3_str	1	0	0	0						4139_s3_s1_ctx	6	3	0	0
4139_s3_s2_str	1	1	0	0						4139_s3_s4_str	0	0	0	0						4139_s3_s2_ctx	7	6	0	0
4139_s3_s3_str	1	0	0	0						4139_s4_s1_str	0	0	0	0						4139_s3_s3_ctx	5	3	1	0
4139_s3_s4_str	0	0	0	0						4139_s4_s2_str	1	0	0	0						4139_s3_s4_ctx	5	2	0	0
4139_s3_s1_ctx	6	3	0	0						4139_s4_s3_str	1	0	0	0						4139_s3_s5_ctx	7	5	0	0
4139_s3_s2_ctx	7	6	0	0						4139_s4_s4_str	0	0	0	0						4139_s4_s1_ctx	1	0	0	0
4139_s3_s3_ctx	5	3	1	0						4139_s5_s1_str	2	0	0	0						4139_s4_s2_ctx	5	1	0	0
4139_s3_s4_ctx	5	2	0	0						4139_s5_s2_str	2	0	0	0						4139_s4_s3_ctx	0	0	0	0
4139_s3_s5_ctx	7	5	0	0						4139_s5_s3_str	0	0	0	0						4139_s4_s4_ctx	0	0	0	0
4139_s4_s1_str	0	0	0	0						4139_s5_s4_str	0	0	0	0						4139_s5_s1_ctx	2	1	0	0
4139_s4_s2_str	1	0	0	0						4139_s6_s1_str	1	0	0	0						4139_s5_s2_ctx	2	1	0	0
4139_s4_s3_str	1	0	0	0						4139_s6_s2_str	0	0	0	0						4139_s5_s3_ctx	2	1	0	0
4139_s4_s4_str	0	0	0	0						4139_s6_s3_str	0	0	0	0						4139_s5_s4_ctx	0	0	0	0
4139_s4_s1_ctx	1	0	0	0						4139_s6_s4_str	1	0	0	0						4139_s5_s5_ctx	0	0	0	0
4139_s4_s2_ctx	5	1	0	0						4139_s7_s1_str	0	0	0	0						4139_s6_s1_ctx	10	7	0	0
4139_s4_s3_ctx	0	0	0	0						4139_s7_s2_str	0	0	0	0						4139_s6_s2_ctx	4	4	0	0
4139_s4_s4_ctx	0	0	0	0						4139_s7_s3_str	0	0	0	0						4139_s6_s3_ctx	2	2	0	0
4139_s5_s1_str	2	0	0	0						4139_s7_s4_str	0	0	0	0						4139_s6_s4_ctx	1	0	0	0
4139_s5_s2_str	2	0	0	0						4139_s8_s1_str	0	0	0	0						4139_s6_s5_ctx	1	0	0	0
4139_s5_s3_str	0	0	0	0						4139_s9_s1_str	1	0	0	0						4139_s6_s6_ctx	0	0	0	0
4139_s5_s4_str	0	0	0	0						4139_s9_s2_str	0	0	0	0						4139_s7_s1_ctx	9	6	0	0
4139_s5_s1_ctx	2	1	0	0						4139_s9_s3_str	0	0	0	0						4139_s7_s2_ctx	11	2	0	0
4139_s5_s2_ctx	2	1	0	0						4139_s9_s4_str	0	0	0	0						4139_s7_s3_ctx	6	3	0	0
4139_s5_s3_ctx	2	1	0	0						4139_s10_s1_str	0	0	0	0						4139_s7_s4_ctx	0	0	0	0
4139_s5_s4_ctx	0	0	0	0						4139_s10_s2_str	0	0	0	0						4139_s7_s5_ctx	1	0	0	0
4139_s5_s5_ctx	0	0	0	0						4139_s10_s3_str	0	0	0	0						4139_s8_s1_ctx	1	1	0	0
4139_s6_s1_str	1	0	0	0																4139_s8_s2_ctx	3	3	0	0
4139_s6_s2_str	0	0	0	0						sum	11	1	0	0						4139_s8_s3_ctx	3	2	0	0
4139_s6_s3_str	0	0	0	0										0						4139_s8_s4_ctx	1	0	0	0
4139_s6_s4_str	1	0	0	0																4139_s9_s1_ctx	3	0	1	0
4139_s6_s1_ctx	10	7	0	0																4139_s9_s2_ctx	8	5	0	0
4139_s6_s2_ctx	4	4	0	0																4139_s9_s3_ctx	4	1	0	0
4139_s6_s3_ctx	2	2	0	0																4139_s9_s4_ctx	1	0	0	0
4139_s6_s4_ctx	1	0	0	0																4139_s10_s1_ctx	4	0	0	0
4139_s6_s5_ctx	1	0	0	0																4139_s10_s2_ctx	1	1	0	0
4139_s6_s6_ctx	0	0	0	0																4139_s10_s3_ctx	0	0	0	0
4139_s7_s1_str	0	0	0	0																4139_s10_s4_ctx	1	0	0	0
4139_s7_s2_str	0	0	0	0
4139_s7_s3_str	0	0	0	0																sum	127	63	2	0
4139_s7_s4_str	0	0	0	0																				0
4139_s7_s1_ctx	9	6	0	0
4139_s7_s2_ctx	11	2	0	0
4139_s7_s3_ctx	6	3	0	0
4139_s7_s4_ctx	0	0	0	0
4139_s7_s5_ctx	1	0	0	0
4139_s8_s1_str	0	0	0	0
4139_s8_s1_ctx	1	1	0	0
4139_s8_s2_ctx	3	3	0	0
4139_s8_s3_ctx	3	2	0	0
4139_s8_s4_ctx	1	0	0	0
4139_s9_s1_str	1	0	0	0
4139_s9_s2_str	0	0	0	0
4139_s9_s3_str	0	0	0	0
4139_s9_s4_str	0	0	0	0
4139_s9_s1_ctx	3	0	1	0
4139_s9_s2_ctx	8	5	0	0
4139_s9_s3_ctx	4	1	0	0
4139_s9_s4_ctx	1	0	0	0
4139_s10_s1_str	0	0	0	0
4139_s10_s2_str	0	0	0	0
4139_s10_s3_str	0	0	0	0
4139_s10_s1_ctx	4	0	0	0
4139_s10_s2_ctx	1	1	0	0
4139_s10_s3_ctx	0	0	0	0
4139_s10_s4_ctx	1	0	0	0

## Sheet: 4131
	GFP+	GFP+NeuN	GFP+Calbindin	GFP+Calb+NeuN+	Calb+	NeuN+					GFP+	GFP+NeuN	GFP+Calbindin	GFP+Calb+NeuN+	Calb+	NeuN+					GFP+	GFP+NeuN	GFP+Calbindin	GFP+Calb+NeuN+	Calb+	NeuN+
4131_s2_s1_ctx	6	5	0	0
4131_s2_s2_ctx	6	1	0	0						Striatum										Cortex
4131_s2_s3_ctx	6	5	0	0						4131_s3_s1_str	3	2	1	1						4131_s2_s1_ctx	6	5	0	0
4131_s3_s1_str	3	2	1	1						4131_s3_s2_str	1	1	0	0						4131_s2_s2_ctx	6	1	0	0
4131_s3_s2_str	1	1	0	0						4131_s3_s3_str	2	2	0	0						4131_s2_s3_ctx	6	5	0	0
4131_s3_s3_str	2	2	0	0						4131_s4_s1_str	3	3	0	0						4131_s3_s1_ctx	13	9	1	1
4131_s3_s1_ctx	13	9	1	1						4131_s5_s1_str	2	1	0	0						4131_s3_s2_ctx	6	5	0	0
4131_s3_s2_ctx	6	5	0	0						4131_s5_s2_str	2	1	0	0						4131_s3_s3_ctx	3	3	1	1
4131_s3_s3_ctx	3	3	1	1						4131_s5_s3_str	4	4	0	0						4131_s4_s1_ctx	28	19	0	0
4131_s4_s1_str	3	3	0	0						4131_s5_s4_str	4	3	0	0						4131_s4_s2_ctx	17	12	1	1
4131_s4_s1_ctx	28	19	0	0						4131_s6_s1_str	3	0	0	0						4131_s4_s3_ctx	5	4	0	0
4131_s4_s2_ctx	17	12	1	1						4131_s6_s2_str	1	1	0	0						4131_s4_s4_ctx	7	7	0	0
4131_s4_s3_ctx	5	4	0	0						4131_s6_s3_str	7	6	0	0						4131_s4_s5_ctx	3	3	0	0
4131_s4_s4_ctx	7	7	0	0						4131_s6_s4_str	14	13	2	2						4131_s5_s1_ctx	4	3	0	0
4131_s4_s5_ctx	3	3	0	0						4131_s7_s1_str	1	1	0	0						4131_s5_s2_ctx	3	3	1	1
4131_s5_s1_str	2	1	0	0						4131_s7_s2_str	10	6	2	2						4131_s5_s3_ctx	5	3	1	1
4131_s5_s2_str	2	1	0	0						4131_s7_s3_str	18	12	2	2						4131_s5_s4_ctx	7	5	0	0
4131_s5_s3_str	4	4	0	0						4131_s8_s1_str	2	2	0	0						4131_s6_s1_ctx	7	7	0	0
4131_s5_s4_str	4	3	0	0						4131_s8_s2_str	14	9	3	3						4131_s6_s2_ctx	13	13	1	1
4131_s5_s1_ctx	4	3	0	0						4131_s8_s3_str	5	3	0	0						4131_s6_s3_ctx	6	3	0	0
4131_s5_s2_ctx	3	3	1	1						4131_s8_s4_str	2	1	0	0						4131_s6_s4_ctx	10	10	0	0
4131_s5_s3_ctx	5	3	1	1						4131_s9_s2_str	2	0	0	0						4131_s6_s5_ctx	13	9	0	0
4131_s5_s4_ctx	7	5	0	0																4131_s6_s6_ctx	9	8	1	1
4131_s6_s1_str	3	0	0	0						sum	100	71	10	10						4131_s7_s1_ctx	20	16	1	1
4131_s6_s2_str	1	1	0	0										14.0845						4131_s7_s2_ctx	0	0	0	0
4131_s6_s3_str	7	6	0	0																4131_s7_s3_ctx	5	5	0	0
4131_s6_s4_str	14	13	2	2																4131_s8_s1_ctx	17	12	0	0
4131_s6_s1_ctx	7	7	0	0																4131_s8_s2_ctx	1	1	0	0
4131_s6_s2_ctx	13	13	1	1																4131_s8_s3_ctx	7	4	1	0
4131_s6_s3_ctx	6	3	0	0																4131_s8_s4_ctx	11	6	1	1
4131_s6_s4_ctx	10	10	0	0																4131_s9_s1_ctx	6	5	0	0
4131_s6_s5_ctx	13	9	0	0																4131_s9_s2_ctx	13	11	0	0
4131_s6_s6_ctx	9	8	1	1																4131_s10_s1_ctx	6	6	1	1
4131_s7_s1_str	1	1	0	0																4131_s10_s2_ctx	5	4	0	0
4131_s7_s2_str	10	6	2	2																4131_s10_s3_ctx	4	2	0	0
4131_s7_s3_str	18	12	2	2																4131_s10_s4_ctx	10	5	0	0
4131_s7_s1_ctx	20	16	1	1
4131_s7_s2_ctx	0	0	0	0																sum	282	214	11	10
4131_s7_s3_ctx	5	5	0	0																				4.6729
4131_s8_s1_str	2	2	0	0
4131_s8_s2_str	14	9	3	3
4131_s8_s3_str	5	3	0	0
4131_s8_s4_str	2	1	0	0
4131_s8_s1_ctx	17	12	0	0
4131_s8_s2_ctx	1	1	0	0
4131_s8_s3_ctx	7	4	1	0
4131_s8_s4_ctx	11	6	1	1
4131_s9_s2_str	2	0	0	0
4131_s9_s1_ctx	6	5	0	0
4131_s9_s2_ctx	13	11	0	0
4131_s10_s1_ctx	6	6	1	1
4131_s10_s2_ctx	5	4	0	0
4131_s10_s3_ctx	4	2	0	0
4131_s10_s4_ctx	10	5	0	0

## Sheet: 4126
	GFP+	GFP+NeuN	GFP+Calbindin	GFP+Calb+NeuN+	Calb+	NeuN+					GFP+	GFP+NeuN	GFP+Calbindin	GFP+Calb+NeuN+	Calb+	NeuN+					GFP+	GFP+NeuN	GFP+Calbindin	GFP+Calb+NeuN+	Calb+	NeuN+
4126_s2_s1_ctx	1	1	0	0
4126_s2_s2_ctx	0	0	0	0						Striatum										Cortex
4126_s2_s3_ctx	0	0	0	0						4126_s3_s1_str	0	0	0	0						4126_s2_s1_ctx	1	1	0	0
4126_s3_s1_str	0	0	0	0						4126_s3_s2_str	3	0	0	0						4126_s2_s2_ctx	0	0	0	0
4126_s3_s2_str	3	0	0	0						4126_s4_s1_str	0	0	0	0						4126_s2_s3_ctx	0	0	0	0
4126_s3_s1_ctx	1	1	0	0						4126_s4_s2_str	1	0	0	0						4126_s3_s1_ctx	1	1	0	0
4126_s3_s2_ctx	1	1	0	0						4126_s4_s3_str	0	0	0	0						4126_s3_s2_ctx	1	1	0	0
4126_s3_s3_ctx	1	1	0	0						4126_s5_s1_str	3	2	1	1						4126_s3_s3_ctx	1	1	0	0
4126_s3_s4_ctx	3	1	0	0						4126_s5_s2_str	1	0	0	0						4126_s3_s4_ctx	3	1	0	0
4126_s3_s5_ctx	1	1	0	0						4126_s5_s3_str	0	0	0	0						4126_s3_s5_ctx	1	1	0	0
4126_s4_s1_str	0	0	0	0						4126_s5_s4_str	0	0	0	0						4126_s4_s1_ctx	2	2	1	1
4126_s4_s2_str	1	0	0	0						4126_s6_s1_str	0	0	0	0						4126_s4_s2_ctx	7	7	0	0
4126_s4_s3_str	0	0	0	0						4126_s6_s2_str	0	0	0	0						4126_s4_s3_ctx	2	2	0	0
4126_s4_s1_ctx	2	2	1	1						4126_s6_s3_str	1	0	0	0						4126_s4_s4_ctx	1	1	0	0
4126_s4_s2_ctx	7	7	0	0						4126_s6_s4_str	0	0	0	0						4126_s4_s5_ctx	19	18	0	0
4126_s4_s3_ctx	2	2	0	0						4126_s6_s5_str	0	0	0	0						4126_s5_s1_ctx	5	3	0	0
4126_s4_s4_ctx	1	1	0	0						4126_s7_s1_str	1	0	1	0						4126_s5_s2_ctx	3	3	0	0
4126_s4_s5_ctx	19	18	0	0						4126_s7_s2_str	0	0	0	0						4126_s5_s3_ctx	4	4	0	0
4126_s5_s1_str	3	2	1	1						4126_s7_s3_str	1	0	0	0						4126_s5_s4_ctx	1	0	0	0
4126_s5_s2_str	1	0	0	0						4126_s7_s4_str	0	0	0	0						4126_s5_s5_ctx	1	0	0	0
4126_s5_s3_str	0	0	0	0						4126_s8_s1_str	0	0	0	0						4126_s6_s1_ctx	4	3	0	0
4126_s5_s4_str	0	0	0	0						4126_s8_s2_str	0	0	0	0						4126_s6_s2_ctx	3	3	0	0
4126_s5_s1_ctx	5	3	0	0						4126_s8_s3_str	0	0	0	0						4126_s6_s3_ctx	2	2	1	1
4126_s5_s2_ctx	3	3	0	0						4126_s8_s4_str	0	0	0	0						4126_s6_s4_ctx	0	0	0	0
4126_s5_s3_ctx	4	4	0	0						4126_s8_s5_str	0	0	0	0						4126_s6_s5_ctx	0	0	0	0
4126_s5_s4_ctx	1	0	0	0						4126_s9_s1_str	0	0	0	0						4126_s7_s1_ctx	0	0	0	0
4126_s5_s5_ctx	1	0	0	0						4126_s9_s2_str	0	0	0	0						4126_s7_s2_ctx	0	0	0	0
4126_s6_s1_str	0	0	0	0						4126_s9_s3_str	0	0	0	0						4126_s7_s3_ctx	1	1	0	0
4126_s6_s2_str	0	0	0	0						4126_s9_s4_str	1	1	1	1						4126_s7_s4_ctx	9	8	0	0
4126_s6_s3_str	1	0	0	0						4126_s10_s1_str	5	3	0	0						4126_s7_s5_ctx	3	3	0	0
4126_s6_s4_str	0	0	0	0						4126_s10_s2_str	2	2	0	0						4126_s7_s6_ctx	0	0	0	0
4126_s6_s5_str	0	0	0	0						4126_s10_s3_str	0	0	0	0						4126_s8_s1_ctx	3	3	0	0
4126_s6_s1_ctx	4	3	0	0																4126_s8_s2_ctx	0	0	0	0
4126_s6_s2_ctx	3	3	0	0							19	8	3	2						4126_s8_s3_ctx	0	0	0	0
4126_s6_s3_ctx	2	2	1	1										25						4126_s8_s4_ctx	1	0	0	0
4126_s6_s4_ctx	0	0	0	0																4126_s9_s1_ctx	0	0	0	0
4126_s6_s5_ctx	0	0	0	0																4126_s9_s2_ctx	1	1	0	0
4126_s7_s1_str	1	0	1	0																4126_s9_s3_ctx	2	2	0	0
4126_s7_s2_str	0	0	0	0																4126_s9_s4_ctx	1	1	0	0
4126_s7_s3_str	1	0	0	0																4126_s9_s5_ctx	2	2	0	0
4126_s7_s4_str	0	0	0	0																4126_s9_s6_ctx	7	6	1	1
4126_s7_s1_ctx	0	0	0	0																4126_s9_s7_ctx	1	1	0	0
4126_s7_s2_ctx	0	0	0	0																4126_s10_s1_ctx	2	1	0	0
4126_s7_s3_ctx	1	1	0	0																4126_s10_s2_ctx	5	5	1	1
4126_s7_s4_ctx	9	8	0	0																4126_s10_s3_ctx	0	0	0	0
4126_s7_s5_ctx	3	3	0	0																4126_s10_s4_ctx	0	0	0	0
4126_s7_s6_ctx	0	0	0	0																4126_s10_s5_ctx	0	0	0	0
4126_s8_s1_str	0	0	0	0
4126_s8_s2_str	0	0	0	0																sum	100	88	4	4
4126_s8_s3_str	0	0	0	0																				4.54545
4126_s8_s4_str	0	0	0	0
4126_s8_s5_str	0	0	0	0
4126_s8_s1_ctx	3	3	0	0
4126_s8_s2_ctx	0	0	0	0
4126_s8_s3_ctx	0	0	0	0
4126_s8_s4_ctx	1	0	0	0
4126_s9_s1_str	0	0	0	0
4126_s9_s2_str	0	0	0	0
4126_s9_s3_str	0	0	0	0
4126_s9_s4_str	1	1	1	1
4126_s9_s1_ctx	0	0	0	0
4126_s9_s2_ctx	1	1	0	0
4126_s9_s3_ctx	2	2	0	0
4126_s9_s4_ctx	1	1	0	0
4126_s9_s5_ctx	2	2	0	0
4126_s9_s6_ctx	7	6	1	1
4126_s9_s7_ctx	1	1	0	0
4126_s10_s1_str	5	3	0	0
4126_s10_s2_str	2	2	0	0
4126_s10_s3_str	0	0	0	0
4126_s10_s1_ctx	2	1	0	0
4126_s10_s2_ctx	5	5	1	1
4126_s10_s3_ctx	0	0	0	0
4126_s10_s4_ctx	0	0	0	0
4126_s10_s5_ctx	0	0	0	0

## Sheet: 4140
	GFP+	GFP+NeuN	GFP+Calbindin	GFP+Calb+NeuN+	Calb+	NeuN+					GFP+	GFP+NeuN	GFP+Calbindin	GFP+Calb+NeuN+	Calb+	NeuN+					GFP+	GFP+NeuN	GFP+Calbindin	GFP+Calb+NeuN+	Calb+	NeuN+
4140_s2_s1_str	3	3	0	0
4140_s2_s2_str	15	10	0	0						Striatum										Cortex
4140_s2_s3_str	7	5	0	0						4140_s2_s1_str	3	3	0	0						4140_s2_s1_ctx	1	1	0	0
4140_s2_s4_str	0	0	0	0						4140_s2_s2_str	15	10	0	0						4140_s2_s2_ctx	2	1	0	0
4140_s2_s1_ctx	1	1	0	0						4140_s2_s3_str	7	5	0	0						4140_s2_s3_ctx	2	2	0	0
4140_s2_s2_ctx	2	1	0	0						4140_s2_s4_str	0	0	0	0						4140_s2_s4_ctx	0	0	0	0
4140_s2_s3_ctx	2	2	0	0						4140_s3_s1_str	6	4	0	0						4140_s3_s1_ctx	1	1	0	0
4140_s2_s4_ctx	0	0	0	0						4140_s3_s2_str	3	2	0	0						4140_s3_s2_ctx	2	2	0	0
4140_s3_s1_str	6	4	0	0						4140_s3_s3_str	1	1	0	0						4140_s3_s3_ctx	2	2	0	0
4140_s3_s2_str	3	2	0	0						4140_s3_s4_str	2	2	1	1						4140_s3_s4_ctx	1	0	0	0
4140_s3_s3_str	1	1	0	0						4140_s4_s1_str	0	0	0	0						4140_s3_s5_ctx	0	0	0	0
4140_s3_s4_str	2	2	1	1						4140_s4_s2_str	0	0	0	0						4140_s4_s1_ctx	3	3	0	0
4140_s3_s1_ctx	1	1	0	0						4140_s4_s3_str	0	0	0	0						4140_s4_s2_ctx	1	1	0	0
4140_s3_s2_ctx	2	2	0	0						4140_s4_s4_str	0	0	0	0						4140_s4_s3_ctx	1	1	0	0
4140_s3_s3_ctx	2	2	0	0						4140_s4_s5_str	0	0	0	0						4140_s4_s4_ctx	0	0	0	0
4140_s3_s4_ctx	1	0	0	0						4140_s5_s1_str	0	0	0	0						4140_s4_s5_ctx	1	1	0	0
4140_s3_s5_ctx	0	0	0	0						4140_s5_s2_str	0	0	0	0						4140_s5_s1_ctx	1	1	0	0
4140_s4_s1_str	0	0	0	0						4140_s5_s3_str	0	0	0	0						4140_s5_s2_ctx	1	1	0	0
4140_s4_s2_str	0	0	0	0						4140_s5_s4_str	3	2	1	1						4140_s5_s3_ctx	1	0	0	0
4140_s4_s3_str	0	0	0	0						4140_s5_s5_str	0	0	0	0						4140_s5_s4_ctx	2	2	0	0
4140_s4_s4_str	0	0	0	0						4140_s6_s1_str	0	0	0	0						4140_s5_s5_ctx	1	1	0	0
4140_s4_s5_str	0	0	0	0						4140_s6_s2_str	0	0	0	0						4140_s5_s6_ctx	1	0	0	0
4140_s4_s1_ctx	3	3	0	0						4140_s6_s3_str	0	0	0	0						4140_s6_s1_ctx	7	6	0	0
4140_s4_s2_ctx	1	1	0	0						4140_s6_s4_str	0	0	0	0						4140_s6_s2_ctx	15	9	0	0
4140_s4_s3_ctx	1	1	0	0						4140_s6_s5_str	0	0	0	0						4140_s6_s3_ctx	3	3	0	0
4140_s4_s4_ctx	0	0	0	0						4140_s7_s1_str	0	0	0	0						4140_s6_s4_ctx	2	2	0	0
4140_s4_s5_ctx	1	1	0	0						4140_s7_s2_str	0	0	0	0						4140_s6_s5_ctx	0	0	0	0
4140_s5_s1_str	0	0	0	0						4140_s7_s3_str	0	0	0	0						4140_s6_s6_ctx	0	0	0	0
4140_s5_s2_str	0	0	0	0						4140_s7_s4_str	0	0	0	0						4140_s7_s1_ctx	3	2	0	0
4140_s5_s3_str	0	0	0	0						4140_s7_s5_str	0	0	0	0						4140_s7_s2_ctx	6	6	0	0
4140_s5_s4_str	3	2	1	1						4140_s8_s1_str	0	0	0	0						4140_s7_s3_ctx	0	0	0	0
4140_s5_s5_str	0	0	0	0						4140_s8_s2_str	0	0	0	0						4140_s7_s4_ctx	2	1	0	0
4140_s5_s1_ctx	1	1	0	0						4140_s8_s3_str	0	0	0	0						4140_s7_s5_ctx	5	4	0	0
4140_s5_s2_ctx	1	1	0	0						4140_s8_s4_str	0	0	0	0						4140_s7_s6_ctx	2	2	0	0
4140_s5_s3_ctx	1	0	0	0						4140_s9_s1_str	0	0	0	0						4140_s8_s1_ctx	6	4	0	0
4140_s5_s4_ctx	2	2	0	0																4140_s8_s2_ctx	5	4	0	0
4140_s5_s5_ctx	1	1	0	0						sum	40	29	2	2						4140_s8_s3_ctx	2	2	0	0
4140_s5_s6_ctx	1	0	0	0										6.89655						4140_s8_s4_ctx	1	1	0	0
4140_s6_s1_str	0	0	0	0																4140_s8_s5_ctx	0	0	0	0
4140_s6_s2_str	0	0	0	0																4140_s9_s1_ctx	5	3	0	0
4140_s6_s3_str	0	0	0	0																4140_s9_s2_ctx	0	0	0	0
4140_s6_s4_str	0	0	0	0																4140_s9_s3_ctx	0	0	0	0
4140_s6_s5_str	0	0	0	0																4140_s9_s4_ctx	0	0	0	0
4140_s6_s1_ctx	7	6	0	0																4140_s9_s5_ctx	0	0	0	0
4140_s6_s2_ctx	15	9	0	0																4140_s10_s1_ctx	2	1	0	0
4140_s6_s3_ctx	3	3	0	0																4140_s10_s2_ctx	0	0	0	0
4140_s6_s4_ctx	2	2	0	0																4140_s10_s3_ctx	1	1	1	1
4140_s6_s5_ctx	0	0	0	0																4140_s10_s4_ctx	3	3	0	0
4140_s6_s6_ctx	0	0	0	0																4140_s10_s5_ctx	1	1	0	0
4140_s7_s1_str	0	0	0	0
4140_s7_s2_str	0	0	0	0																	95	75	1	1
4140_s7_s3_str	0	0	0	0																				1.33333
4140_s7_s4_str	0	0	0	0
4140_s7_s5_str	0	0	0	0
4140_s7_s1_ctx	3	2	0	0
4140_s7_s2_ctx	6	6	0	0
4140_s7_s3_ctx	0	0	0	0
4140_s7_s4_ctx	2	1	0	0
4140_s7_s5_ctx	5	4	0	0
4140_s7_s6_ctx	2	2	0	0
4140_s8_s1_str	0	0	0	0
4140_s8_s2_str	0	0	0	0
4140_s8_s3_str	0	0	0	0
4140_s8_s4_str	0	0	0	0
4140_s8_s1_ctx	6	4	0	0
4140_s8_s2_ctx	5	4	0	0
4140_s8_s3_ctx	2	2	0	0
4140_s8_s4_ctx	1	1	0	0
4140_s8_s5_ctx	0	0	0	0
4140_s9_s1_str	0	0	0	0
4140_s9_s1_ctx	5	3	0	0
4140_s9_s2_ctx	0	0	0	0
4140_s9_s3_ctx	0	0	0	0
4140_s9_s4_ctx	0	0	0	0
4140_s9_s5_ctx	0	0	0	0
4140_s10_s1_ctx	2	1	0	0
4140_s10_s2_ctx	0	0	0	0
4140_s10_s3_ctx	1	1	1	1
4140_s10_s4_ctx	3	3	0	0
4140_s10_s5_ctx	1	1	0	0

## Sheet: 4141
	GFP+	GFP+NeuN	GFP+Calbindin	GFP+Calb+NeuN+	Calb+	NeuN+					GFP+	GFP+NeuN	GFP+Calbindin	GFP+Calb+NeuN+	Calb+	NeuN+					GFP+	GFP+NeuN	GFP+Calbindin	GFP+Calb+NeuN+	Calb+	NeuN+
4141_s3_s1_str	19	18	0	0
4141_s3_s2_str	4	4	0	0						Striatum										Cortex
4141_s3_s3_str	9	7	0	0						4141_s3_s1_str	19	18	0	0						4141_s3_s1_ctx	1	1	0	0
4141_s3_s4_str	2	2	0	0						4141_s3_s2_str	4	4	0	0						4141_s3_s2_ctx	1	1	1	1
4141_s3_s1_ctx	1	1	0	0						4141_s3_s3_str	9	7	0	0						4141_s3_s3_ctx	2	1	0	0
4141_s3_s2_ctx	1	1	1	1						4141_s3_s4_str	2	2	0	0						4141_s3_s4_ctx	0	0	0	0
4141_s3_s3_ctx	2	1	0	0						4141_s4_s1_str	17	16	0	0						4141_s4_s1_ctx	18	14	1	1
4141_s3_s4_ctx	0	0	0	0						4141_s4_s2_str	37	33	0	0						4141_s4_s2_ctx	21	20	0	0
4141_s4_s1_str	17	16	0	0						4141_s4_s3_str	28	28	0	0						4141_s4_s3_ctx	13	10	1	1
4141_s4_s2_str	37	33	0	0						4141_s4_s4_str	19	16	0	0						4141_s4_s4_ctx	5	5	1	1
4141_s4_s3_str	28	28	0	0						4141_s4_s5_str	7	5	0	0						4141_s4_s5_ctx	5	5	0	0
4141_s4_s4_str	19	16	0	0						4141_s5_s1_str	20	16	0	0						4141_s4_s6_ctx	2	2	0	0
4141_s4_s5_str	7	5	0	0						4141_s5_s2_str	27	24	0	0						4141_s5_s1_ctx	5	5	2	2
4141_s4_s1_ctx	18	14	1	1						4141_s5_s3_str	26	10	0	0						4141_s5_s2_ctx	15	13	0	0
4141_s4_s2_ctx	21	20	0	0						4141_s5_s4_str	26	16	2	2						4141_s5_s3_ctx	16	11	0	0
4141_s4_s3_ctx	13	10	1	1						4141_s5_s5_str	25	17	3	1						4141_s5_s4_ctx	25	24	1	1
4141_s4_s4_ctx	5	5	1	1						4141_s6_s1_str	16	12	0	0						4141_s5_s5_ctx	9	7	2	2
4141_s4_s5_ctx	5	5	0	0						4141_s6_s2_str	13	10	1	1						4141_s5_s6_ctx	9	9	0	0
4141_s4_s6_ctx	2	2	0	0						4141_s6_s3_str	16	14	2	2						4141_s5_s7_ctx	10	9	0	0
4141_s5_s1_str	20	16	0	0						4141_s6_s4_str	10	10	0	0						4141_s6_s1_ctx	9	7	0	0
4141_s5_s2_str	27	24	0	0						4141_s6_s5_str	7	4	0	0						4141_s6_s2_ctx	7	6	0	0
4141_s5_s3_str	26	10	0	0						4141_s7_s1_str	1	1	0	0						4141_s6_s3_ctx	9	7	0	0
4141_s5_s4_str	26	16	2	2						4141_s7_s2_str	7	7	0	0						4141_s6_s4_ctx	3	3	0	0
4141_s5_s5_str	25	17	3	1						4141_s7_s3_str	2	1	0	0						4141_s6_s5_ctx	5	2	0	0
4141_s5_s1_ctx	5	5	2	2						4141_s7_s4_str	7	7	0	0						4141_s6_s6_ctx	5	4	0	0
4141_s5_s2_ctx	15	13	0	0						4141_s7_s5_str	9	7	0	0						4141_s7_s1_ctx	16	14	0	0
4141_s5_s3_ctx	16	11	0	0						4141_s8_s1_str	2	0	0	0						4141_s7_s2_ctx	16	12	0	0
4141_s5_s4_ctx	25	24	1	1						4141_s8_s2_str	1	0	0	0						4141_s7_s3_ctx	45	25	0	0
4141_s5_s5_ctx	9	7	2	2						4141_s8_s3_str	1	1	1	1						4141_s7_s4_ctx	18	15	0	0
4141_s5_s6_ctx	9	9	0	0						4141_s8_s4_str	1	0	0	0						4141_s7_s5_ctx	26	22	1	1
4141_s5_s7_ctx	10	9	0	0						4141_s9_s1_str	4	4	0	0						4141_s7_s6_ctx	2	2	0	0
4141_s6_s1_str	16	12	0	0						4141_s9_s2_str	0	0	0	0						4141_s8_s1_ctx	5	4	0	0
4141_s6_s2_str	13	10	1	1																4141_s8_s2_ctx	2	2	0	0
4141_s6_s3_str	16	14	2	2							363	290	9	7						4141_s8_s3_ctx	1	0	0	0
4141_s6_s4_str	10	10	0	0										2.41379						4141_s8_s4_ctx	1	1	0	0
4141_s6_s5_str	7	4	0	0																4141_s8_s5_ctx	6	6	0	0
4141_s6_s1_ctx	9	7	0	0																4141_s9_s1_ctx	4	4	0	0
4141_s6_s2_ctx	7	6	0	0																4141_s9_s2_ctx	7	5	1	1
4141_s6_s3_ctx	9	7	0	0																4141_s9_s3_ctx	2	1	0	0
4141_s6_s4_ctx	3	3	0	0																4141_s9_s4_ctx	4	2	0	0
4141_s6_s5_ctx	5	2	0	0																4141_s9_s5_ctx	7	3	0	0
4141_s6_s6_ctx	5	4	0	0
4141_s7_s1_str	1	1	0	0																sum	357	284	11	11
4141_s7_s2_str	7	7	0	0																				3.87324
4141_s7_s3_str	2	1	0	0
4141_s7_s4_str	7	7	0	0
4141_s7_s5_str	9	7	0	0
4141_s7_s1_ctx	16	14	0	0
4141_s7_s2_ctx	16	12	0	0
4141_s7_s3_ctx	45	25	0	0
4141_s7_s4_ctx	18	15	0	0
4141_s7_s5_ctx	26	22	1	1
4141_s7_s6_ctx	2	2	0	0
4141_s8_s1_str	2	0	0	0
4141_s8_s2_str	1	0	0	0
4141_s8_s3_str	1	1	1	1
4141_s8_s4_str	1	0	0	0
4141_s8_s1_ctx	5	4	0	0
4141_s8_s2_ctx	2	2	0	0
4141_s8_s3_ctx	1	0	0	0
4141_s8_s4_ctx	1	1	0	0
4141_s8_s5_ctx	6	6	0	0
4141_s9_s1_str	4	4	0	0
4141_s9_s2_str	0	0	0	0
4141_s9_s1_ctx	4	4	0	0
4141_s9_s2_ctx	7	5	1	1
4141_s9_s3_ctx	2	1	0	0
4141_s9_s4_ctx	4	2	0	0
4141_s9_s5_ctx	7	3	0	0

[truncated: 8 more sheets: 4143, 4132, 4153, 4135, 4155, 2733, 4156, Compiled]
