# Supplementary material for: Injection with Toxoplasma gondii protein affects neuron health and survival
Source: eLife. 2021 Jun 9;10:e67681. doi: 10.7554/eLife.67681 (PMC8270641; doi:10.7554/eLife.67681)
Supplement: Figure 2—source data 2. [file elife-67681-fig2-data2.xlsx]

## Sheet: Sheet1
1791 Section 1	GFP+	PV+	PV+ GFP+
Spot1	58	34	0
Spot2	9	10	0
Spot 3	14	11	0
	81	55	0
1791 Section 2
Spot 1	19	19	0
Spot 2	58	10	0
Spot 3	24	0	0
	101	29	0
1791 Section 3
Spot 1	21	7	0
Spot 2	13	11	0
	34	18	0
1791 Section 4
Spot 1	100	14	0
Spot 2	32	33	0
Spot 3	24	0	0
	156	47	0
1793 Section 1
Spot 1	0	0	0
	0	0	0
1793 Section 2
Spot 1	0	0	0
	0	0	0
1793 Section 3
Spot 1	0	0	0
	0	0	0
1793 Section 4
Spot 1	0	0	0
	0	0	0
1793 Section 5
Spot 1	0	0	0
Spot 2	0	0	0
Spot 3	0	0	0
Spot 4	0	0	0
	0	0	0
1793 Section 6
Spot 1	0	1	0
Spot 2	0	0	0
Spot 3	0	19	0
Spot 4	0	21	0
Spot 5	0	11	0
	0	52	0
1793 Section 7
Spot 1	0	4	0
Spot 2	0	5	0
Spot 3	0	7	0
Spot 4	0	5	0
	0	21	0
1793 Section 8
Spot 1	0	0	0
Spot 2	0	5	0
Spot 3	0	23	0
Spot 4	0	44	0
	0	72	0
1796 Section 1
Spot 1	37	0	0
Spot 2	16	40	0
Spot 3	7	16	0
Spot 4	12	24	0
	72	80	0
1796 Section 2
Spot 1	11	3	0
Spot 2	8	28	1
Spot 3	12	10	0
Spot 4	15	16	0
	46	57	0
1796 Section 3
Spot 1	7	0	0
Spot 2	6	27	0
Spot 3	19	7	0
Spot 4	26	9	0
	58	43	0
1796 Section 4
Spot 1	14	28	0
Spot 2	5	24	0
Spot 3	11	60	0
Spot 4	5	22	0
	35	134	0
1796 Section 5
Spot 1	10	9	0
Spot 2	2	13	0
Spot 3	1	0	0
Spot 4	24	6	0
	37	28	0
1796 Section 6
Spot 1	0	0	0
Spot 2	2	8	0
Spot 3	16	0	0
Spot 4	10	0	0
	28	8	0
1796 Section 7
Spot 1	19	9	0
Spot 2	9	0	0
Spot 3	8	9	0
Spot 4	2	10	0
	38	28	0
1824 Section 1
Spot 1	0	35	0
Spot 2	0	10	0
Spot 3	0	20	0
Spot 4	0	7	0
	0	72	0
1824 Section 2
Spot 1	0	26	0
Spot 2	0	18	0
Spot 3	0	21	0
	0	65	0
1824 Section 3
Spot 1	0	24	0
Spot 2	0	42	0
Spot 3	0	21	0
Spot 4	0	0	0
	0	87	0
1824 Section 4
Spot 1	0	0	0
Spot 2	0	31	0
Spot 3	0	0	0
Spot 4	0	11	0
	0	42	0
1824 Section 5
Spot 1	0	28	0
Spot 2	0	38	0
Spot 3	0	37	0
Spot 4	0	0	0
	0	103	0
1790 Slide 1 BG 2
Spot 1	3	20	0
Spot 2	18	23	0
Spot 3	4	35	0
Spot 4	3	10	0
	28	88	0
1790 Slide 1 BG 4
Spot 1	0	4	0
Spot 2	1	1	0
Spot 3	3	4	0
Spot 4	0	2	0
	4	11	0
1790 Slide 1 BG 5
Spot 1	7	9	0
Spot 2	3	6	0
Spot 3	8	7	0
Spot 4	12	9	0
	30	31	0
1790 Slide 1 BG 6
Spot 1	1	25	0
Spot 2	0	16	0
Spot 3	2	38	0
	3	79	0
1790 Slide 1 IC 2
Spot 1	3	4	0
Spot 2	1	17	0
Spot 3	1	0	0
Spot 4	0	26	0
	5	47	0
1790 Slide 1 IC 3
Spot 1	1	0	0
Spot 2	1	19	0
Spot 3	0	25	0
Spot 4	5	15	0
	7	59	0
1790 Slide 1 IC 4
Spot 1	3	31	0
Spot 2	3	2	0
Spot 3	2	0	0
Spot 4	3	26	0
	11	59	0
1790 Slide 1 IC 5
Spot 1	3	22	0
Spot 2	0	5	0
Spot 3	1	14	0
Spot 4	4	2	0
	8	43	0
1790 Slide 1 IC 6
Spot 1	2	19	0
Spot 2	0	23	0
Spot 3	2	8	0
Spot 4	1	6	0
	5	56	0
1761 Slide 2 _1 IC
Spot 1	0	50	0
Spot 2	0	52	0
Spot 3	1	38	0
Spot 4	3	43	0
	4	183	0
1761 Slide 2_1 BG
Spot 1	0	26	0
Spot 2	0	41	0
Spot 3	0	33	0
Spot 4	0	18	0
	0	118	0
1761 Slide 2_2 BG
Spot 1	4	7	0
Spot 2	0	12	0
Spot 3	2	12	0
	6	31	0
1761 Slide 2_2 IC
Spot 1	2	29	0
Spot 2	0	34	0
Spot 3	1	46	0
Spot 4	1	25	0
	4	134	0
1761 Slide 2_3 BG
Spot 1	0	0	0
Spot 2	0	0	0
Spot 3	0	0	0
	0	0	0
1761 Slide 2_4 IC
Spot 1	0	0	0
Spot 2	0	0	0
Spot 3	0	0	0
	0	0	0
1789 Slide 1 BG 2
Spot 1	3	24	0
Spot 2	2	24	0
Spot 3	0	20	0
Spot 4	1	12	0
	6	80	0
1789 Slide 2 BG 1
Spot 1	0	21	0
Spot 2	1	6	0
Spot 3	2	2	0
Spot 4	0	15	0
	3	44	0
1789 Slide 2 BG 2
Spot 1	2	18	0
Spot 2	3	13	0
Spot 3	0	19	0
Spot 4	0	8	0
	5	58	0
1789 Slide 2 IC 1
Spot 1	0	15	0
Spot 2	0	14	0
Spot 3	13	42	0
Spot 4	2	20	0
	15	91	0
1789 Slide 2 IC 2
Spot 1	7	35	0
Spot 2	5	33	0
Spot 3	5	12	0
Spot 4	2	18	0
	19	98	0
1779 Slide 1 BG 2
Spot 1	5	25	0
Spot 2	2	20	0
Spot 3	2	9	0
Spot 4	0	14	0
	9	68	0
1779 Slide 1 BG 3
Spot 1	1	7	0
Spot 2	0	14	0
Spot 3	1	8	0
Spot 4	2	9	0
	4	38	0
1779 Slide 1 BG 4
Spot 1	7	23	0
Spot 2	1	9	0
Spot 3	2	15	0
Spot 4	1	21	0
	11	68	0
1779 Slide 1 BG 5
Spot 1	3	4	0
Spot 2	0	8	0
Spot 3	1	1	0
Spot 4	0	24	0
	4	37	0
1779 Slide 1 BG 6
Spot 1	0	14	0
Spot 2	1	9	0
Spot 3	2	10	0
Spot 4	0	11	0
	3	44	0
1779 Slide 1 BG 7
Spot 1	6	20	0
Spot 2	3	8	0
Spot 3	4	15	0
Spot 4	5	6	0
	18	49	0
1779 Slide 1 IC 2
Spot 1	5	33	0
Spot 2	0	36	0
Spot 3	1	6	0
Spot 4	1	28	0
	7	103	0
1779 Slide 1 IC 3
Spot 1	9	20	0
Spot 2	3	26	0
Spot 3	0	25	0
Spot 4	0	26	0
	12	97	0
1779 Slide 1 IC 4
Spot 1	6	15	0
Spot 2	5	13	0
Spot 3	4	24	0
Spot 4	2	24	0
	17	76	0
1779 Slide 1 IC 5
Spot 1	1	24	0
Spot 2	3	10	0
Spot 3	0	18	0
Spot 4	5	11	0
	9	63	0
1779 Slide 1 IC 6
Spot 1	4	27	0
Spot 2	0	12	0
Spot 3	4	9	0
Spot 4	3	16	0
	11	64	0
1779 Slide 1 IC 7
Spot 1	1	8	0
Spot 2	0	18	0
Spot 3	3	15	0
Spot 4	8	7	0
	12	48	0

## Sheet: 1790
PcA	GFP+	PV+	PV+ GFP+		Striatum	GFP+	PV+	PV+ GFP+	Average/image
1790_s2_s1_str	3	20	0
1790_s2_s2_str	18	23	0
1790_s2_s3_str	4	35	0
1790_s2_s4_str	3	10	0
1790_s4_s1_str	0	4	0
1790_s4_s2_str	1	1	0
1790_s4_s3_str	3	4	0
1790_s4_s4_str	0	2	0
1790_s5_s1_str	7	9	0
1790_s5_s2_str	3	6	0
1790_s5_s3_str	8	7	0
1790_s5_s4_str	12	9	0
1790_s6_s1_str	1	25	0
1790_s6_s2_str	0	16	0
1790_s6_s3_str	2	38	0			65	209	0	13.9333
1790_s2_s1_ctx	3	4	0		Cortex
1790_s2_s2_ctx	1	17	0
1790_s2_s3_ctx	1	0	0
1790_s2_s4_ctx	0	26	0
1790_s3_s1_ctx	1	0	0
1790_s3_s2_ctx	1	19	0
1790_s3_s3_ctx	0	25	0
1790_s3_s4_ctx	5	15	0
1790_s4_s1_ctx	3	31	0
1790_s4_s2_ctx	3	2	0
1790_s4_s3_ctx	2	0	0
1790_s4_s4_ctx	3	26	0
1790_s5_s1_ctx	3	22	0
1790_s5_s2_ctx	0	5	0
1790_s5_s3_ctx	1	14	0
1790_s5_s4_ctx	4	2	0
1790_s6_s1_ctx	2	19	0
1790_s6_s2_ctx	0	23	0
1790_s6_s3_ctx	2	8	0
1790_s6_s4_ctx	1	6	0
						36	264	0	13.2

## Sheet: 1761
PcA	GFP+	PV+	PV+ GFP+			GFP+	PV+	PV+ GFP+	PV/Image
1761_s1_s1_str	0	26	0		Striatum	6	149	0	14.9
1761_s1_s2_str	0	41	0		Cortex	8	317	0	28.8182
1761_s1_s3_str	0	33	0
1761_s1_s4_str	0	18	0
1761_s2_s1_str	4	7	0
1761_s2_s2_str	0	12	0
1761_s2_s3_str	2	12	0
1761_s3_s1_str	0	0	0
1761_s3_s2_str	0	0	0
1761_s3_s3_str	0	0	0
1761_s1_s1_ctx	0	50	0
1761_s1_s2_ctx	0	52	0
1761_s1_s3_ctx	1	38	0
1761_s1_s4_ctx	3	43	0
1761_s2_s1_ctx	2	29	0
1761_s2_s2_ctx	0	34	0
1761_s2_s3_ctx	1	46	0
1761_s2_s4_ctx	1	25	0
1761_s4_s1_ctx	0	0	0
1761_s4_s2_ctx	0	0	0
1761_s4_s3_ctx	0	0	0

## Sheet: 1789
PcA	GFP+	PV+	PV+ GFP+			GFP+	PV+	PV+ GFP+	PV/Image
1789_s1_s1_str	0	21	0		Striatum	9	124	0	15.5
1789_s1_s2_str	1	6	0		Cortex	34	189	0	23.625
1789_s1_s3_str	2	2	0
1789_s1_s4_str	0	15	0
1789_s2_s1_str	3	24	0
1789_s2_s2_str	2	24	0
1789_s2_s3_str	0	20	0
1789_s2_s4_str	1	12	0
1789_s1_s1_ctx	0	15	0
1789_s1_s2_ctx	0	14	0
1789_s1_s3_ctx	13	42	0
1789_s1_s4_ctx	2	20	0
1789_s2_s1_ctx	7	35	0
1789_s2_s2_ctx	5	33	0
1789_s2_s3_ctx	5	12	0
1789_s2_s4_ctx	2	18	0

## Sheet: 1779
PcA	GFP+	PV+	PV+ GFP+				GFP+	PV+	PV+ GFP+	PV/Image
1779_s2_s1_str	5	25	0			Striatum	49	304	0	12.6667
1779_s2_s2_str	2	20	0			Cortex	68	451	0	18.7917
1779_s2_s3_str	2	9	0
1779_s2_s4_str	0	14	0
1779_s3_s1_str	1	7	0
1779_s3_s2_str	0	14	0
1779_s3_s3_str	1	8	0
1779_s3_s4_str	2	9	0
1779_s4_s1_str	7	23	0
1779_s4_s2_str	1	9	0
1779_s4_s3_str	2	15	0
1779_s4_s4_str	1	21	0
1779_s5_s1_str	3	4	0
1779_s5_s2_str	0	8	0
1779_s5_s3_str	1	1	0
1779_s5_s4_str	0	24	0
1779_s6_s1_str	0	14	0
1779_s6_s2_str	1	9	0
1779_s6_s3_str	2	10	0
1779_s6_s4_str	0	11	0
1779_s7_s1_str	6	20	0
1779_s7_s2_str	3	8	0
1779_s7_s3_str	4	15	0
1779_s7_s4_str	5	6	0
1779_s2_s1_ctx	5	33	0
1779_s2_s2_ctx	0	36	0
1779_s2_s3_ctx	1	6	0
1779_s2_s4_ctx	1	28	0
1779_s3_s1_ctx	9	20	0
1779_s3_s2_ctx	3	26	0
1779_s3_s3_ctx	0	25	0
1779_s3_s4_ctx	0	26	0
1779_s4_s1_ctx	6	15	0
1779_s4_s2_ctx	5	13	0
1779_s4_s3_ctx	4	24	0
1779_s4_s4_ctx	2	24	0
1779_s5_s1_ctx	1	24	0
1779_s5_s2_ctx	3	10	0
1779_s5_s3_ctx	0	18	0
1779_s5_s4_ctx	5	11	0
1779_s6_s1_ctx	4	27	0
1779_s6_s2_ctx	0	12	0
1779_s6_s3_ctx	4	9	0
1779_s6_s4_ctx	3	16	0
1779_s7_s1_ctx	1	8	0
1779_s7_s2_ctx	0	18	0
1779_s7_s3_ctx	3	15	0
1779_s7_s4_ctx	8	7	0

## Sheet: 1791
cortex	GFP+	PV+	GFP+ PV+	Spot #				GFP+	PV+	PV+ GFP+	PV/Image
1791#1	60	11	1	2			Striatum	30	17	0	8.5
1791 #2	38	40	0	1			Cortex	346	210	0	23.3333
1791#3	24	5	0	3
1791 #1	45	64	0	1
1791#2	66	13	0	2
1791 #3	26	8	0	1
1791 #4	34	40	0	2
1791 #3	18	16	0	2
1791 #4	35	13	0	1
striatum
1791 #1	24	14	0	3
1791#2	6	3	0	3

## Sheet: 1796
striatum	GFP+	PV+	GFP+ PV+	spot#			GFP+	PV+	PV+ GFP+	PV/Image
1796#1	13	24	0	4		Striatum	84	108	0	15.4286
1796 #2	13	19	0	4		Cortex	281	519	4	24.7143
1796#3	18	12	0	4
1796#4	8	29	0	4
1796#5	18	9	0	4
1796#6	13	2	0	4
1796#7	1	13	0	4
cortex
1796 #1	7	21	0	3
1796 #2	13	10	0	3
1796 #3	20	10	0	3
1796 #4	18	100	0	3
1796#1	29	99	0	2
1796 #1	37	2	0	1
1796 #2	4	6	0	1
1796#3	10	0	0	1
1796#4	12	35	0	1
1796 #5	4	0	0	3
1796#6	20	3	0	3
1796 #7	9	30	0	3
1796 #2	9	29	1	2
1796#3	5	30	0	2
1796 #4	7	42	0	2
1796#5	6	25	0	2
1796 #6	4	19	1	2
1796 #7	17	5	0	2
1796 #5	10	10	0	1
1796#6	6	32	0	1
1796 #7	34	11	2	1

## Sheet: 1793
cortex	GFP+	PV+	GFP+ PV+	Spot #			GFP+	PV+	PV+ GFP+	PV/Image
1793 #5	0	11	0	3		Striatum	1	92	0	18.4
1793 #6	0	11	0	3		Cortex	36	77	0	5.13333
1793#7	1	12	0	3
1793 #8	0	22	0	3
1793 #2	17	1	0	1
1793 #1	11	0	0	1
1793 #3	7	0	0	1
1793 #5	0	0	0	1
1793 #6	0	0	0	2
1793 #7	0	5	0	2
1793#5	0	5	0	2
1793 #5	0	1	0	1
1793#6	0	1	0	1
1793 #7	0	8	0	1
1793#8	0	0	0	1
striatum
1793#4	0	4	0	4
1793#5	1	4	0	4
1793 #6	0	17	0	4
1793#7	0	7	0	4
1793 #8	0	60	0	4

## Sheet: 1824
striatum	GFP+	PV+	GFP+ PV+	Spot #			GFP+	PV+	PV+ GFP+	PV/Image
1824 #1	0	10	0	4		Striatum	30	17	0	8.5
1824 #2	0	5	0	4		Cortex	346	210	0	23.3333
1824 #3	0	46	0	4
1824 #4	0	24	0	4
1824 #5	0	41	0	4
cortex
1824#1	0	28	0	3
1824#2	0	44	0	3
1824#3	0	42	0	3
1824#4	0	66	0	3
1824#5	0	52	0	3
1824 #1	2	19	0	2
1824 #2	0	31	0	2
1824 #3	0	53	0	2
1824 #4	0	39	0	2
1824 #5	0	57	0	2
1824 #1	58	0	0	1
1824 #2	0	33	0	1
1824 #3	0	40	0	1
1824 #4	0	97	0	1
1824 #5	0	48	0	1
