# Supplementary material for: Injection with Toxoplasma gondii protein affects neuron health and survival
Source: eLife. 2021 Jun 9;10:e67681. doi: 10.7554/eLife.67681 (PMC8270641; doi:10.7554/eLife.67681)
Supplement: Figure 3—source data 1. [file elife-67681-fig3-data1.xlsx]

## Sheet: 4141
	GFP+	GFP+ NeuN+	GFP+DARPP32+	GFP+DARPP32+NeuN+	DARPP32+
4141_s1_s1_ctx	5	2	0	0	61
4141_S1_S1_str	2	1	0	0	94
4141_s1_s2_str	6	4	1	1	88
4141_s2_s1_str	37	30	9	6	102
4141_s2_s2_str	18	7	2	1	61
4141_s4_s1_str	4	2	2	2	115
4141_s4_s2_str	15	10	5	4	127
4141_s4_s3_str	37	22	11	7	56
4141_s4_s4_str	24	19	5	4	119
4141_s4_s5_str	21	18	6	6	134
4141_s5_s1_str	4	3	0	0	158
4141_s5_s2_str	1	0	0	0	116
4141_s6_s1_str	11	3	0	0	107
4141_s6_s2_str	21	18	4	4	103
4141_s6_s3_str	8	4	3	1	101
4141_s7_s1_ctx	3	1	1	1	101
4141_s7_s1_str	0	0	0	0	115
4141_s7_s2_str	5	5	1	1	107
4141_s8_s1_str	0	0	0	0	143
4141_s9_s1_ctx	3	0	0	0	56
4141_s9_s1_str	2	2	1	1	165
4141_s10_s1_ctx	10	5	0	0	26
Sum	237	156	51	39	2255
Average	10.7727	7.09091	2.31818	1.77273	102.5
Standard Deviation	11.1737	8.59074	3.13788	2.28727	34.4587
Image count	22

## Sheet: 4135
	GFP+	GFP+ NeuN+	GFP+DARPP32+	GFP+DARPP32+NeuN+	DARPP32+
4135_s2_s1_str	9	3	1	0	181
4135_s3_s1_str	3	1	0	0	125
4135_s3_s2_str	2	2	2	2	133
4135_s4_s1_str	1	0	0	0	154
4135_s4_s2_str	5	4	3	2	142
4135_s5_s1_ctx	3	3	3	3	181
4135_s5_s1_str	1	1	0	0	151
4135_s6_s1_str	1	1	0	0	150
4135_s6_s2_str	1	1	0	0	0	No DARPP32?
Sum	26	16	9	7	1217
Average	2.88889	1.77778	1	0.777778	135.222
Standard Deviation	2.66667	1.30171	1.32288	1.20185	54.1428
Image count	9

## Sheet: 4131
	GFP+	GFP+ NeuN+	GFP+DARPP32+	GFP+DARPP32+NeuN+	DARPP32+
4131_s1_s1_ctx	17	11	1	1	76	Very light DARPP
4131_s3_s1_str	3	3	2	2	21	Very few DARPP
4131_s4_s1_str	5	4	1	1	116
4131_s4_s2_str	1	1	0	0	109
4131_s4_s3_str	3	1	0	0	64
4131_s4_s4_str	5	1	1	0	172
4131_s5_s1_str	2	0	0	0	137
4131_s5_s2_str	3	2	0	0	157
4131_s5_s3_str	1	1	1	1	101
4131_s6_s1_str	1	0	0	0	168
4131_s6_s2_str	9	9	2	2	122
4131_s6_s3_str	24	21	4	4	70
4131_s6_s4_str	7	7	0	0	166
4131_s6_s5_str	8	5	4	1	124
Sum	89	66	16	12	1603
Image count	14

## Sheet: 4132
	GFP+	GFP+ NeuN+	GFP+DARPP32+	GFP+DARPP32+NeuN+	DARPP32+
4132_s3_s1_str	4	3	2	2	208
4132_s3_s2_str	30	27	1	1	127
4132_s3_s3_str	No image	No image	No image	No image	18	Only one gray image
4132_s3_s4_str	5	3	2	2	181
4132_s3_s5_str	1	1	0	0	109
4132_s4_s1_str	24	21	2	2	76
4132_s5_s1_str	3	1	1	0	86
4132_s5_s2_str	22	13	1	1	119
4132_s5_s3_str	3	3	0	0	100
4132_s5_s4_str	6	5	2	2	102
4132_s5_s5_str	31	29	2	2	109
4132_s6_s1_str	5	3	1	0	122
4132_s6_s2_str	6	3	0	0	53
4132_s6_s3_str	2	1	0	0	0
4132_s7_s1_str	9	2	0	0	150
4132_s7_s2_str	2	2	0	0	129
4132_s7_s3_str	3	1	1	0	142
4132_s8_s1_str	3	2	0	0	124
4132_s8_s2_str	19	15	1	1	61
4132_s9_s1_str	2	1	1	1	92
4132_s9_s2_str	6	4	2	2	127
4132_s10_s1_str	2	1	1	1	148
4132_s11_s1_ctx	1	1	1	1	147
4132_s12_s1_str	1	1	0	0	81
4132_s12_s2_str	5	3	1	0	128
4132_s12_s3_str	2	2	0	0	106
Sum	197	148	22	18	2827
Image count	26

## Sheet: 4139
	GFP+	GFP+ NeuN+	GFP+DARPP32+	GFP+DARPP32+NeuN+	DARPP32+
4139_s5_s1_str	0		0	0	178
4139_s6_s1_str	4	3	1	0	121
4139_s6_s2_str	1	0	0	0	113
4139_s7_s1_str	1	1	0	0	132
4139_s8_s1_str	1	1	1	1	132
Sum	7	5	2	1	676
Image count	5

## Sheet: 4140
	GFP+	GFP+ NeuN+	GFP+DARPP32+	GFP+DARPP32+NeuN+	DARPP32+
4140_s3_s1_str	9	7	1	1	80
4140_s3_s2_str	4	2	1	0	107
4140_s4_s1_str	3	1	0	0	96
4140_s4_s2_str	2	2	0	0	143
4140_s5_s1_str	2	2	0	0	130
4140_s5_s2_str	3	3	0	0	126
4140_s5_s3_str	1	0	0	0	174
4140_s7_s1_str	4	3	0	0	180
Sum	28	20	2	1	1036
Image count	8

## Sheet: 4133
	GFP+	GFP+ NeuN+	GFP+DARPP32+	GFP+DARPP32+NeuN+	DARPP32+
4133_s3_s1_str	18	15	1	1	69
4133_s3_s2_str	5	5	1	1	162
4133_s4_s1_str	2	2	1	1	145
4133_s4_s2_str	2	2	0	0	139
4133_s4_s3_str	3	3	1	1	118
4133_s4_s4_str	6	5	0	0	79
4133_s5_s1_str	2	2	1	1	42
4133_s5_s2_str	4	4	1	1	117
4133_s5_s3_str	7	4	2	2	118
4133_s5_s4_str	8	8	1	1	142
4133_s5_s5_str	0	0	0	0	31
4133_s6_s1_ctx	3	2	1	1	73
4133_s6_s1_str	1	1	0	0	153
4133_s6_s2_str	1	1	1	1	137
4133_s6_s3_str	1	1	1	1	146
4133_s6_s4_str	10	10	1	1	108
4133_s6_s5_str	20	15	5	5	149
4133_s6_s6_str	7	4	3	3	134
4133_s7_s1_str	3	3	3	3	178
4133_s7_s2_str	19	14	2	2	91
4133_s8_s1_str	11	9	4	4	82
4133_s8_s2_str	13	12	3	3	168
4133_s8_s3_str	11	10	2	2	200
4133_s8_s4_str	1	1	1	1	168
4133_s8_s5_str	6	5	3	3	156
4133_s8_s6_str	8	0	0	0	181
4133_s9_s1_str	1	1	0	0	171
4133_s9_s2_str	1	1	0	0	169
4133_s9_s3_str	4	4	0	0	104
4133_s9_s4_str	1	1	0	0	156
4133_s9_s5_str	2	2	2	2	190
4133_s10_s1_str	3	3	0	0	151
4133_s10_s2_str	4	4	1	0	154
4133_s11_s2_str	9	5	1	1	89
4133_s11_s3_str	1	1	0	0	52
Sum	198	160	43	42	4522
Average	5.30303	4.24242	1.24242	1.21212	130.03
Standard Deviation	5.09586	4.05455	1.29977	1.31714	43.3471
Image count	35

## Sheet: 4126
	GFP+	GFP+ NeuN+	GFP+DARPP32+	GFP+DARPP32+NeuN+	DARPP32+
4126_s3_s1_str	6	6	1	1	119
4126_s4_s1_ctx	2	2	1	1	120
4126_s4_s1_str	3	3	1	1	74
4126_s5_s1_ctx	2	2	1	1	152
4126_s5_s1_str	0	0	0	0	92
4126_s5_s2_str	1	1	1	1	106
4126_s9_s1_str	1	1	0	0	97
4126_s9_s2_str	1	1	0	0	80
4126_s9_s3_str	0	0	0	0	0	?
4126_s10_s1_str	2	2	1	1	89
4126_s11_s1_str	1	1	0	0	192
Sum	19	19	6	6	1121
Image count	11

## Sheet: 4148
	GFP+	GFP+ NeuN+	GFP+DARPP32+	GFP+DARPP32+NeuN+	DARPP32+
4148_s2_s1_str	1	1	0	0	84
4148_s4_s1_str	3	1	2	1	128
4148_s6_s1_str	0	0	0	0	92	No image
4148_s7_s1_str	4	4	0	0	80
4148_s7_s2_str	3	3	0	0	95
4148_s9_s1_str	6	6	0	0	66
4148_s10_s1_str	1	1	0	0	82
Sum	18	16	2	1	627
Image count	7

## Sheet: 4153
	GFP+	GFP+ NeuN+	GFP+DARPP32+	GFP+DARPP32+NeuN+	DARPP32+
4153_s7_s1_str	1	1	0	0	84
4153_s7_s2_str	3	1	2	1	128
4153_s8_s1_str	0	0	0	0	92	No image
Sum	4	2	2	1	304
Average	1.33333	0.666667	0.666667	0.333333	101.333
Standard Deviation	1.52753	0.57735	1.1547	0.57735	23.4379
Image count	3

[truncated: 9 more sheets: 4143, 4146, 4147, 4144, 4154, 4155, 4156, Compiled, Sheet1]
