# Supplementary material for: Injection with Toxoplasma gondii protein affects neuron health and survival
Source: eLife. 2021 Jun 9;10:e67681. doi: 10.7554/eLife.67681 (PMC8270641; doi:10.7554/eLife.67681)
Supplement: Figure 3—source data 2. [file elife-67681-fig3-data2.xlsx]

## Sheet: 4132
4132_str_3272020	FOXP2+	Upper Threshold	Lower Threshold
_s3_spot1_series1	376	16275	65535
s2_spot1-3_series1	367
s2_spot1-3_series2	431	18658	65535
s2_spot1-3_series3	352	20558	65535
s3_spot1-5_series1	402	23710	65535
s3_spot1-5_series2	335	30349	65535
s3_spot1-5_series3	301	31706	65535
s3_spot1-5_series4	396	23958	65535
s3_spot1-5_series5	338	23828	66535
s4_spot1-7_series1	382	19337	66535
s4_spot1-7_series2	327	33403	65535
s4_spot1-7_series3	501	21182	65535
s4_spot1-7_series4	419	24118	65535
s4_spot1-7_series5	436	23602	65535
s5_spot1-5_series1	419	23205	65535
s5_spot1-5_series2	401	29040	65535
s5_spot1-5_series3	425	18560	65535
s5_spot1-5_series4	333	19541	65535
s5_spot1-5_series5	383	22440	65535
s6_spot1-5_series1	470	24867	65535
s6_spot1-5_series2	381	26902	65535
s6_spot1-5_series3	455	26914	65535
s6_spot1-5_series4	396	25773	65535
s6_spot1-5_series5	316	23932	65535
s7_spot1-5_series1	184	26222	65535
s7_spot1-5_series2	445	18252	65535
s7_spot1-5_series3	155	23237	65535
s7_spot1-5_series4	242	16680	65535
s7_spot1-5_series5	420	16542	65535
s8_spot1-5_series1	499	17692	65535
s8_spot1-5_series2	209	18319	65535
s8_spot1-5_series3	443	10338	65535
s8_spot1-5_series4	449	17675	65535
s8_spot1-5_series5	306	15000	65535
s9_spot1-2_series1	309	7383	54935	Really bad picture
s9_spot1-2_series2	209	8548	62824	No threshold could show all cells
s10)spot1_series1	298	11124	65535	No threshold could show all cells
Average	365.135	21079.7	65220.8
Standard Deviation	84.6427	6050.83	1811.66
Total	13510

## Sheet: 4131
	FOXP2+	Upper	Lower
4131_s2_s1_str	189	25921	65535
4131_s3_s1-2_series1	260	24207	65535
4131_s3_s1-2_series2	226	19934	65535
4131_s4_s1-2_series1	182	13092	65535
4131_s4_s1-2_series2	371	22468	65535
4131_s5_s1-5_series1	261	25521	65535
4131_s5_s1-5_series2	282	19923	65535
4131_s5_s1-5_series3	386	20232	65535
4131_s5_s1-5_series4	321	22340	65535
4131_s5_s1-5_series5	354	22302	65535
4131_s6_s1-5_series1	257	21312	65535
4131_s6_s1-5_series2	464	21409	65535
4131_s6_s1-5_series3	467	21837	65535
4131_s6_s1-5_series4	469	22112	65535
4131_s6_s1-5_series5	177	16743	65535
4131_s7_s1-5_series1	414	23433	65535
4131_s7_s1-5_series2	386	20205	65535
4131_s7_s1-5_series3	361	19864	65535
4131_s7_s1-5_series4	318	22284	65535
4131_s7_s1-5_series5	429	20506	65535
4131_s8_s1-5_series1	434	24398	65535
4131_s8_s1-5_series2	219	34715	65535
4131_s8_s1-5_series3	404	23670	65535
4131_s8_s1-5_series4	624	24583	65535
4131_s8_s1-5_series5	313	20515	65535
4131_s9_s1-5_series1	391	15390	65535
4131_s9_s1-5_series2	414	8853	65535
4131_s9_s1-5_series3	436	16321	65535
4131_s9_s1-5_series4	400	14634	65535
4131_s9_s1-5_series5	236	13090	65535
4131_s10_s1-2_series1	395	14027	65535
standard deviation	101.478	4823.12	0
Average	349.677	20187.9	65535
Total	10840

## Sheet: 4133
	FOXP2+	Upper	Lower
4133_s2_s1-2_series1	290	36361	65535
4133_s2_s1-2_series2	312	43611	65535
4133_s3_s1-5_series1	332	29718	65535
4133_s3_s1-5_series2	419	42215	65535
4133_s3_s1-5_series3	365	30022	65535
4133_s3_s1-5_series4	440	30013	65535
4133_s3_s1-5_series5	345	28007	65535
4133_s4_s1-5_series1	343	28520	65535
4133_s4_s1-5_series2	411	28254	65535
4133_s4_s1-5_series3	406	34776	65535
4133_s4_s1-5_series4	485	35864	65535
4133_s4_s1-5_series5	385	27497	65535
4133_s5_s1-5_series1	312	41009	65535
4133_s5_s1-5_series2	443	28760	65535
4133_s5_s1-5_series3	455	36566	65535
4133_s5_s1-5_series4	313	41316	65535
4133_s5_s1-5_series5	257	34060	65535
4133_s6_s1-5_series1	408	31788	65535
4133_s6_s1-5_series2	293	47375	65535
4133_s6_s1-5_series3	435	28962	65535
4133_s6_s1-5_series4	363	34018	65535
4133_s6_s1-5_series5	331	35970	65535
4133_s7_s1-5_series1	427	32020	65535
4133_s7_s1-5_series2	323	35084	65535
4133_s7_s1-5_series3	375	40124	65535
4133_s7_s1-5_series4	328	33800	65535
4133_s7_s1-5_series5	366	22052	65535
4133_s8_s1-5_series1	399	38966	65535
4133_s8_s1-5_series2	319	42292	65535
4133_s8_s1-5_series3	402	28801	65535
4133_s8_s1-5_series4	243	47868	65535
4133_s8_s1-5_series5	331	26883	65535
4133_s9_s1-5_series1	415	29021	65535
4133_s9_s1-5_series2	387	28474	65535
4133_s9_s1-5_series3	204	42044	65535
4133_s9_s1-5_series4	303	26538	65535
4133_s9_s1-5_series5	383	26965	65535
4133_s10_s1-3_series1	619	28635	65535
4133_s10_s1-3_series2	376	32855	65535
4133_s10_s1-3_series3	284	33200	65535
Standard Deviation	73.1455	6150.13	0
Average	365.675	33757.6	65535
Total	14627

## Sheet: 4135
	FOXP2+	Upper	LOWER
4135_s2_s1-2_series1	303	13933	65535
4135_s2_s1-2_series2	254	17104	65535
4135_s3_s1-5_series1	383	18228	65535
4135_s3_s1-5_series2	382	17785	65535
4135_s3_s1-5_series3	410	17947	65535
4135_s3_s1-5_series4	384	16953	65535
4135_s3_s1-5_series5	360	15555	65535
4135_s4_s1-5_series1	391	19530	65535
4135_s4_s1-5_series2	355	17780	65535
4135_s4_s1-5_series3	370	17517	65535
4135_s4_s1-5_series4	373	18619	65535
4135_s4_s1-5_series5	345	16710	65535
4135_s5_s1-5_series1	382	17654	65535
4135_s5_s1-5_series2	411	21382	65535
4135_s5_s1-5_series3	402	19766	65535
4135_s5_s1-5_series4	348	19034	65535
4135_s5_s1-5_series5	321	16185	65535
4135_s6_s1-5_series1	403	22304	65535
4135_s6_s1-5_series2	364	20081	65535
4135_s6_s1-5_series3	348	22634	65535
4135_s6_s1-5_series4	407	17130	65535
4135_s6_s1-5_series5	415	21596	65535
4135_s7_s1-5_series1	333	21562	65535
4135_s7_s1-5_series2	448	26252	65535
4135_s7_s1-5_series3	515	26821	65535
4135_s7_s1-5_series4	526	28719	65535
4135_s7_s1-5_series5	439	26176	65535
4135_s8_s1-5_series1	370	23125	65535
4135_s8_s1-5_series2	437	23868	65535
4135_s8_s1-5_series3	536	24304	65535
4135_s8_s1-5_series4	503	16160	65535
4135_s8_s1-5_series5	414	30252	65535
4135_s8_s1-5_series6	349	21307	65535
4135_s9_s1-5_series1	539	20035	65535
4135_s9_s1-5_series2	445	11508	65535
4135_s9_s1-5_series3	535	18264	65535
4135_s9_s1-5_series4	419	11829	65535
4135_s9_s1-5_series5	563	12213	65535
4135_s10_s1-2_series1	89	16626	65535
4135_s10_s1-2_series2	125	13450	65535
MEAN	392.4
STANDARD DEVIATION	95.1122
Total	15696

## Sheet: 4144
4144_str	FOXP2	UPPER	LOWER
4144_s2_s1-5_series1	341	21416	65535
4144_s2_s1-5_series2	225	41260	65535
4144_s2_s1-5_series3	338	22320	65535
4144_s2_s1-5_series4	455	20992	65535
4144_s3_s1-5_series1	385	21794	65535
4144_s3_s1-5_series2	405	14442	65535
4144_s3_s1-5_series3	387	17714	65535
4144_s3_s1-5_series4	374	22221	65535
4144_s3_s1-5_series5	392	18231	65535
4144_s4_s1-5_series1	393	23622	65535
4144_s4_s1-5_series2	416	21573	65535
4144_s4_s1-5_series3	361	23169	65535
4144_s4_s1-5_series4	380	24121	65535
4144_s4_s1-5_series5	547	27378	65535
4144_s5_s1-5_series1	343	33418	65535
4144_s5_s1-5_series2	414	24877	65535
4144_s5_s1-5_series3	352	22363	65535
4144_s5_s1-5_series4	294	-	65535
4144_s5_s1-5_series5	379	22504	65535
4144_s6_s1-5_series1	323	33460	65535
4144_s6_s1-5_series2	525	26457	65535
4144_s6_s1-5_series3	469	26289	65535
4144_s6_s1-5_series4	185	24311	65535
4144_s6_s1-5_series5	515	24437	65535
4144_s7_s1-5_series1	363	15090	65535
	326	12576	65535
	452	10570	65535
	431	14039	65535
	503	12274	65535
series6	326	13927	65535
s8	456	16394	65535
	301	15607	65535
	379	16322	65535
	421	15996	65535
	403	16364	65535
series6	406	15285	65535
s9	540	20391	65535
	512	14249	65535
	306	18331	65535
	451	16970	65535
MEAN	394.35
STANDARD DEVIATION	79.3604
Total	15774

## Sheet: 4128
4128_str	FOXP2	UPPER	LOWER
s1	401	NONE	65535
	523	NONE	65535
series3	413	NONE	65535
s4	508	16956	65535
	417	12753	65535
	414	12949	65535
	366	15150	65535
	314	14391	65535
series6	367	17282	65535
s5	332	17068	65535
	333	19509	65535
	199	13920	65535
	423	12601	65535
	369	15894	65535
	441	13459	65535
	319	12079	65535
	395	17041	65535
series9	356	16701	65535
s6	397	16809	65535
	379	15677	65535
	432	15451	65535
	450	12138	65535
	340	13757	65535
	309	18471	65535
	458	11370	65535
	478	12095	65535
s7	364	9309	65535
	451	11345	65535
	346	15945	65535
	353	12072	65535
	331	10368	65535
	310	12636	65535
series7	382	11318	65535
s8	234	19878	65535
	375	15463	65535
	309	15295	65535
	442	9877	65535
	494	14692	65535
	349	13909	65535
MEAN	381.359
STANDARD DEVIATION	68.2974
total	14873

## Sheet: 4148
4148_str	FOXP2	UPPER	LOWER
s3	405	9036	65535
	350	9379	65535
series 3	233	10038	65535
s4	337	10107	65535
	387	10751	65535
	437	13801	65535
	427	10306	65535
series 5	410	11062	65535
s5	358	9141	65535
	383	12189	65535
	357	13109	65535
	354	12086	65535
series5	427	11128	65535
s6	459	11450	65535
	490	15098	65535
	492	17598	65535
	451	20262	65535
	355	11630	65535
series6	470	12343	65535
s7	483	23121	65535
	519	17376	65535
	436	26959	65535
	425	23215	65535
	334	24940	65535
series6	474	18488	65535
s8	430	22722	65535
	433	16513	65535
	414	14826	65535
	465	20547	65535
series5	384	19744	65535
s9	445	8548	65535
	464	6271	65535
	425	5707	65535
	462	5913	65535
	501	8167	65535
series6	466	6298	65535
s10	561	8068	65535
series2	479	12119	65535
MEAN	425.842
STANDARD DEVIATION	37
Total	16182

## Sheet: 4146
4146_str	FOXP2+	UPPER	REVISED
s2	491	13059
series2	307	14504
s3	422	13105
	406	15487
	406	15776
	476	13617
series5	379	20190
s4	320	21190
	486	19606
	497	18316
	368	13839
series5	473	20699
s5	400	22851
	473	22841
	469	20550
	465	17891
series5	371	19611
s6	411	18330
	440	25885
	454	19795
	388	18239
series5	360	17184
s7	335	21864
	504	22010
	447	21864
	491	16007
series5	498	18432	502
s8	696	17510	689
	520	14451	529
	618	17350	599
series4	544	15378	559
MEAN	448.871
STANDARD DEVIATION	81.5514
Total	13915

## Sheet: 4143
4143_str	FOXP2	UPPER	LOWER
s3	304	14419	65535
	316	15929	65535
	352	10583	65535
series4	no picture	no picture	NO
s4	298	19829	65535
	391	12692	65535
	390	13794	65535
	386	14684	65535
series5	370	16506	65535
s5	425	17135	65535
	405	20143	65535
	393	23626	65535
	441	18707	65535
series5	320	14955	65535
S6	350	20104	65535
	489	16694	65535
	468	28508	65535
	499	20296	65535
	405	19853	65535
series6	450	15285	65535
s7	471	22290	65535
	419	20846	65535
	480	20846	65535
	430	23613	65535
series5	349	21193	65535
s8	420	4493	65535
	440	4974	65535
	420	5329	65535
	226	4180	65535
	466	5177	65535
s9	566	7207	65535
	436	6290	65535
	405	9457	65535
	343	6290	65535
series5	328	6852	65535
s10	473	7221	65535
	466	7964	65535
	462	6219	65535
series4	398	7931	65535
MEAN	406.579
STANDARD DEVIATION	14
Total	15450

## Sheet: 4152
4152_str	FOXP2	Upper	Lower
s2	365	12347	65535
series2	384	11734	65535
s3	341	16504	65535
	375	13415	65535
	544	12596	65535
	431	14384	65535
series5	457	15391	65535
s4	423	19502	65535
	489	19502	65535
	433	17243	65535
	388	14186	65535
series5	478	14693	65535
s5	342	24569	65535
	346	25900	65535
	442	23382	65535
	466	27455	65535
	453	26438	65535
series6	386	20508	65535
s6	364	20164	65535
	470	22843	65535
	512	21583	65535
	423	17990	65535
series6	408	22301	65535
s7	324	24417	65535
	563	22010	65535
	472	21574	65535
	546	20070	65535
series5	558	20469	65535
s8	566	10395	65535
	533	15984	65535
	465	13030	65535
series4	532	14881	65535
series5	408	13948	65535
s9	578	12257	65535
	624	17739	65535
	394	12317	65535
	558	17462	65535
series5	577	21051	65535
S10	725	21051	65535
	574	20888	65535
	583	17447	65535
	682	14392	65535
series5	601	17494	65535
MEAN	478.674
STANDARD DEVIATION	118
Total	20583

[truncated: 7 more sheets: 4158, 4151, 4147, 4153, 4155, 2733, Compiled]
