# Supplementary material for: Injection with Toxoplasma gondii protein affects neuron health and survival
Source: eLife. 2021 Jun 9;10:e67681. doi: 10.7554/eLife.67681 (PMC8270641; doi:10.7554/eLife.67681)
Supplement: Figure 5—figure supplement 2—source data 1. [file elife-67681-fig5-figsupp2-data1.xlsx]

## Sheet: Sheet1
		Cell	Steps needed						Cell	Steps needed
2018-06-22	2950	1	10					51 tdtCre	2	12
	control	2	15						3	9
		4	12						4	10
		5	10						5	11
2018-06-27	2951	2	11						6	8
		4	11					4017	1	14
		6	13					4118	1	12
2021-06-28	2952	3	12						2	10
		5	14						3	15
		8	10						4	14
	2953	1						4119	1	10
		2	11					4193		13
	3007	1	16					tdt 45	1	12
		2	12						2	15
	54 tdtCre	1	15						3	10
	4013	3	17						4	11
	4195	1	14						6
	4196	1	14					4301	1	14
		2	16					4303	1	9
		3	14						2	12
	4012	1	14						3	9
		2	17					4306	1	11
		3	13						2	11
		4	14						3	12
	4305	1	14					4307	1	12
		2	15						2	15
	4121	1	12						3	12
		2	12					4315	1	13
									2	13
								4334	3	13
									5	11
									6	10
								4362	1	10
								4361	1	14
									2	11
								4363	1	12
								4383	1	11
									2	9
									3
								4384	1	12
