# Supplementary material for: Injection with Toxoplasma gondii protein affects neuron health and survival
Source: eLife. 2021 Jun 9;10:e67681. doi: 10.7554/eLife.67681 (PMC8270641; doi:10.7554/eLife.67681)
Supplement: Figure 5—source data 1. [file elife-67681-fig5-data1.xlsx]

## Sheet: Sheet1
Date Recorded	Animal #	Cell #	Resistance	Rm (mV), entering cell	Current Applied (pA)	Voltage (mV)	Current (pA)	Rin (M ohms)	Resting MP (mV)	AP Threshold (Mv)	AP amplitude (mV)	After hyperpolarization peak (mV)	Delay to first AP (s)	AP Interval (s)
2018-01-28	?	1		-51	-60
		2		-22	0
2018-01-30	YFP	1	16.8	-64.8	-150
		2	18.4	-60	-150
2018-01-31	YFP	1
		2	21.5	-75	200
2018-02-07	YFP	1	13	-40	-250
		2	13.7	-60	-100
2018-02-14	YFP	1	20.2	-65.3	0
		2	26.2	-72.3	-450 Cell was still firing
		3	17.4	-72.9	-50
		4	18	-78.3	200, edited protocol
2018-05-16	2776	1	8.4	-79	-40
		2	8.7	-55	-100
2018-05-17	2777	1	11.2	-67.1	-150
		2	12.4	-30.9?	-200
		3	10.1	-25	-200
2018-05-25	YFP J5	1	9.9	-55	-250
		2	9.3	-60	-250
		3	10.9	-50	-150
2018-06-03	2946	1	11.1	-60	-150
		2	13.8	-60	-50
2018-06-08	294?	1	10.9	-70	-50				-51.57	50.02
2018-06-11	2945	Nothing recorded
2018-06-19	2947	1	7.2	-38	-50
	control	2	9.7	-70	-50	-8	-20.1	398.01	-77.45	-30.21	86.46	-43.79	0.1308	0.11628
		3	10.9	-50	-50			#DIV/0!	-49.26	-43.91
2018-06-21	2948	1	18.2	-75	100			#DIV/0!	-54.66	-22.8
	control	2	10.1	-50	-50			#DIV/0!	-54.44	-44.71
		3	10.4	-30	-50			#DIV/0!
		4	10.3	-60	-50	-0.66661	-9.2	72.4576	-70.47	-47.49	89.75	-57.01	0.05232	0.67199
		5	9.8	-72	100			#DIV/0!	-59.6	-52.43
2018-06-22	2950	1	14	-49	-50	-10.89	-19.8	550	-67.81	-54.57	78.7	-64.27	0.04709	0.12841
	control	2	11.5	-85	0	-2.17	-10.3	210.68	-93.96	-47.03	70.5	-58.81	0.34065	0.12669
		3	15.8	-30	0			#DIV/0!
		4	9.2	-65	-50	-5.55	-19.7	281.726	-70.53	-54.96	85.82	-65.12	0.02878	0.28536
		5	12.4	-65	-50	-7.57	-20.1	376.617	-68.48	-57.8	80.41	-60.91	0.16481	0.19573
2018-06-27	2951	1	9	-50	-50			#DIV/0!
	control	2	11	-60	-50	-4.97	-20.8	238.942	-72.08	-62.5	88.78	-64.97	0.01831
		3	11.1	-60	-50			#DIV/0!	-64	-61.25
	image?	4	12	-75	-50	-1.19	-10	119	-81	-59.81	81.94	-71.17	0.55722	0.18109
		5	12.7	-72	0, firing through out			#DIV/0!
		6	11.6	-72	0	-0.7	-10.7	65.4206	-76.69	-57.46	86.12	-66.41	0.57291	0.23419
2018-06-28	2952	1	11.3	?	-50			#DIV/0!
	control	2	12.5	-80	0			#DIV/0!
		3	16			-2.38	-19.5	122.051	-78.06	-45.96	70.68	-57.07	0.56507	0.30192
		4	16.4	-70	-30			#DIV/0!	-59	-58.38
		5	14.9	-50	-50	40.2	140	287.143	-72.27	-44.53	94.57	-59.23	0.50751	0.18466
		6	10	-82	100			#DIV/0!	-60.03	-53.92
	odd cell	7	14.3	-74	100			#DIV/0!	-65.73	-60.46	84.35	-67.26	XXXXX
		8	14.1	-50	-50	-4.88	-20.3	240.394	-70.7	-65.25	85.72	-68.51	0.01308	0.07131
2018-06-29	2953	1	13.3	-68	0	-5.19	-21.6	240.278	-89.32	-53.44	75.5	-65.64	0.18051	0.14424
	control	2	10.5	-70	0	-2.41	-10	241	-70.37	-62.53	86.3	-70.07
2018-08-22	43 tdt	1	14	-20	-50			#DIV/0!	-9.52	-2.62
	control	2	13.4	-36	-50			#DIV/0!	-36.5	15.01
2018-08-23	3009	1	11.2	10.4	-50			#DIV/0!	9.25	12.05
	cep delta rop16	2	12.2	-10	0			#DIV/0!	-22.25	16.78
		3	11.7	-15.6	0			#DIV/0!	-27.28	10.77
		4	13.2	-16	-30			#DIV/0!	-27.92	4.7
		5	11.5	3.1	-30			#DIV/0!	-6.65	12.85
2018-08-30	3010	1	11.4	-0.4	-30			#DIV/0!	-18.68	6.32
	cep delta rop16	2	12.3	-16	0			#DIV/0!	-26.92	7.29
		3	9.7	7	-20			#DIV/0!	-11.69	6.29
		4	10.3	13.1	-30			#DIV/0!	-12.51	7.05
		5	11	-7.2	0			#DIV/0!	-21.03	10.62
		6	13.8	0.5	-10			#DIV/0!	-14.56	4.85
		7	14.8	-12.1	0			#DIV/0!	-23.74	9.98
2018-09-06	50 tdTC	1	16	7	0			#DIV/0!	-3.14	6.74
	50k CEP	2	15.4	4.6	-30			#DIV/0!	-16.54	-2.87
2018-09-20	3007	1	9.9	-50	-50	-10.31	-20	515.5	-65.89	-42.18	77.85	-52.76	0.54152	0.11201
control		2	11.4	-50	-50	-10.65	-19.5	546.154	-68.72	-35	77.85	-46.51	0.29823	0.19852
		3	11.3	50	-64	-8.51	-22.6	376.549	-62.38	-42.39	91.92	-49.56	0.23806	0.1877
9/21/2018,control	54 tdtCre	1	11.5	-70	50	-7.11	-14	507.857	-73.94	-43.15	99.64	-50.63	0.30084	0.09594
2018-09-25	51 tdtCre	1(TIN)	10.5	-20	-38			#DIV/0!	-35.61	?
50k CEP,08/9/18		2	15.5	-70	0	-2.47	-4.9	504.082	-84.11	-57.68	89.2	-64.64	0.31131	0.20541
		3	13.7	-37	-25	-3.94	-14.6	269.863	-52.22	-41.66	86.24	-46.94	0.05494	0.12669
		4	15.5	-30	-50	-5.31	-18.9	280.952	-69.58	-41.66	87.8	-50.26	0.15173	0.13268
		5	15.3	0	-43	-3.23	-9.2	351.087	-61.4	-37.72	88.47	-49.04	0.21975	0.16162
		6	17.1	-40	-10	-12.2	-16.5	739.394	-47.91	-43.21	78.55	-50.14	0.11772	0.34973
2018-10-15	4020	Nothing recorded						#DIV/0!
10/18/2018, PcA	4034	1	9.4	0	-40	-15.9	-11.6	1370.69	-66.8	-41.38	92.04	-56.64	0.35578	0.13719
		2	13.8	-53	-20	-0.7	-7.9	88.6076	-57.4	-44.53	86.18	-52.43	0.52321	0.19393
2018-10-19	4016	Nothing recorded						#DIV/0!
10/24/2108, 25K CEP, infected 9/30	4017	1	10	-83	0	-2.04	-7.3	279.452	-85.11	-47.03	89.97	-56.78	0.64355	0.23296
2018-10-27	4013	1	11.3	NA	-40			#DIV/0!	-63.11	-44.95	87.59	-53.68	0.43688
Control		2	13.8	NA	-40			#DIV/0!	-58.23	-48.31	82.24	-54.5	0.91038
		3	12.7	-79.5	30	-10.44	-18.3	570.492	-78.58	-46.72	99.58	-60.55	0.57291	0.21919
2018-11-07	4118	1	13.1	-70	0	-18.74	-31.7	591.167	-68.02	-38.64	65.31	-48.1	0.44734	0.29126
CEP		2	11.2	-76.1	0	-7.42	-25.6	289.844	-80.75	-43	76.78	-49.87	0.28253	0.09496
15dpi		3	11.1	-57	-35	-2.11	-23.8	88.6555	-66.04	-50.2	86.85	-59.14	0.16219	0.15457
		4	16.7	-62	0	-1.56	-6.1	255.738	-72.14	-31.34	78.19	-45.81	0.20059	0.1658
2018-11-09	4119	1	15.5	-71.6	0	-3.39	-6.7	505.97	-71.81	-49.84	69	-60.91	0.18181	0.40155
2018-11-09	?	1	?	?				#DIV/0!
2019-01-10	4195	1	9.2	-63	0	-1.8	-6.1	295.082	-69.95	-38.91	88.01	-52.76	0.91777	0.24223
2019-01-16	4193	1	13.6	-71.5	0	-3.69	-6.7	550.746	-77.82	-23.5	36.47	-31.16	0.31393	0.15482
2019-01-17	4196	1	15.4	-59.3	-25	-1.43	-6.1	234.426	-80.41	-42.21	80.29	-51.61	0.97072	0.06486
		2	15.6	-76	0	-1.22	-9.2	132.609	-80.05	-30.49	67.87	-41.38	0.92236	0.13546
		3	12.7	-72.7	0	-2.44	-7.9	308.861	-79.04	-36.44	50.11	-43.37	0.16304	0.1426
2019-01-23	TG(N)	1(YFP)	14.7	-65	-20			#DIV/0!
		2(ctx?)	12.9	?	0			#DIV/0!
		3(TIN)	16.6	-57.1	0			#DIV/0!
2019-01-24	4012 (5months)	1	13.9	-63	0	-1.86	-11.6	160.345	-73.58	-46.6	90.39	-52.64	0.04784	0.07364
		2	16.4	-68.7	20	-3.6	-6.1	590.164	-76.63	-36.01	90.79	-49.65	0.64102	0.25223
		3	16.7	-62	-20	-4.06	-10.4	390.385	-74.07	-36.47	74.37	-67.41	0.99854	0.12218
		4	14.7	-70.5	0	-2.69	-11.6	231.897	-71.26	-34.21	69.58	-48.84	0.31048	0.1264
2019-01-25	tdt 45(N)	1	15.1	-45	30	-2.14	-11.6	184.483	-65.4	-41.41	59.84	-54.66	0.26218	0.11078
		2	13.7	-62.6	-20	-1.65	-11.6	142.241	-61.55	-42.42	86.76	-56.61	0.22421	0.19147
		3	15.5	-66.8	0	-1.77	-9.2	192.391	-72.85	-37.93	87.04	-47.91	0.41642	0.13522
		4	12.5	-64.5	0	-3.54	-6.7	528.358	-66.68	-38.91	73.12	-51.85	0.11425	0.09947
		5(TIN)	13.1	-73	0			#DIV/0!
		6	13	-56.2	0	-2.41	-15.3	157.516	-69.06	-43.21	76.6	-48.83	0.39838	0.15334
2019-02-20	4301	1	14.4	-70.2	0	-3.72	-19.5	190.769	-71.72	-43.91	89.81	-56.76	0.65192	0.34784
2019-02-21	4303	1	13.3	-55	-30	-1.59	-19.5	81.5385	-55.79	-48.1	79.86	-55.24	0.03388	0.1289
		2	14.9	-57	0	-2.23	-4.9	455.102	-70.92	-42.82	69.98	-52.22	0.6188	0.34768
		3	13.7	-58	-20	-2.32	-25	92.8	-66.07	-55.08	82.09	-60.18	0.51187	0.40647
2019-02-26	4305	1	19.1	NA	-10	-0.76	-18.9	40.2116	-72.97	-46.3	87.95	-55.54	0.40372	0.13645
		2	18.7	-70	0	-1.31	-13.4	97.7612	-78.52	-40.04	81.82	-49.59	0.57477	0.17097
2019-02-28	4306 (10k CEP)	1	17.1	-71.2	0	-4.52	-9.8	461.224	-73.91	-45.38	57.92	-48.55	0.42903	0.06904
		2	17.1	-62	-35	-1.98	-18.9	104.762	-70.16	-49.99	75.5	-58.32	0.09941	0.11414
		3	13.7	-67	-10	-1.89	-18.3	103.279	-71.29	-45.84	78.37	-56.64	1.07453	0.34998
2019-03-02	4307	1	15.4	-60	0	-0.98	-4.3	227.907	-65.12	-47.27	86.98	-61.28	0.32962	0.25412
		2	19.8	-64	0	-1.1	-6.1	180.328	-66.86	-32.9	83.56	-43.67	0.56768	0.15539
		3	18.7	-65	0	-3.66	-9.2	397.826	-73.46	-37.41	62.16	-44.49	0.44201	0.13661
2019-03-06	4315	1	17.6	-80	0	-3.66	-8.5	430.588	-74.22	-40.71	69.03	-45.44	0.23544	0.11816
		2	15.3	-65	0	-1.37	-9.8	139.796	-70.16	-47.85	88.23	-57.92	0.27207	0.16613
2019-03-07	4121	1	19.1	-54.5	-40	-7.6	-7.9	962.025	-71.93	-43.15	64.12	-53.1	0.39241	0.16392
		2	14.9	-75	0	-2.9	-6.1	475.41	-76.17	-47.55	86.43	-58.47	0.34908	0.13686
2019-03-12	4332	1	12.3	-65	0	-2.9	-9.2	315.217	-72.17	-44.62	86.06	-55.05	0.25931	0.15326
Notes on a loose sheet		2	19.4	-66	0	-1.65	-6.5	253.846	-69.18	-40.95	81.7	-52.92	0.28628	0.21541
	bad cell	3	17.4	not listed	-40			#DIV/0!
		4	12.2	-78	0	2.99	-9.2	-325	-79.22	-48.1	65.52	-49.65	0.23506	0.17392
2019-03-19	4333	1	16.3	-80	0	-3.3	-10.4	317.308	-79.5	-37.63	70.62	-50.75	0.3758	0.16753
	Not sure MSN.	2	20.5	-65	0	-2.26	-9.8	230.612	-68.3	-37.41	34.42	-52.58	0.12626	0.03756
2019-03-21	4334	1 (TIN)	10.9	-85	-20	-1.8	-9.2	195.652	-53
		2 (TIN)	11	-33	-120	-3.63	-54.78	66.2651	-33
		3	15.1	-69.8	0	-2.23	-12.2	182.787	-77.76	-42.57	80.26	-47	0.38474	0.11972
		4(TIN)	18.7	-26	-180	-3.42	-81.8	41.8093	-44@-180pA
		5	18.7	-67	0	-4.52	-8.5	531.765	-66.19	-39.83	59.91	-48.43	0.54768	0.13087
		6	19.4	-68	0	-4.12	-9.2	447.826	-71.11	-46.91	57.28	-55.39	0.27536	0.22509
2019-03-22	4335	1	16.2	-64	-25	-4.85	-12.8	378.906	-64.7	-41.35	56.79	-53.83	0.07502	0.123
2019-03-28	4362 10K CEP	1	14.2	-40	-35	-13.98	-10.4	1344.23	-72.33	-48.22	69.79	-58.23	0.21066	0.12243
2019-03-29	4361 10K CEP	1	10.8	-70	0	-2.08	-12.8	162.5	-76.9	-42.18	86.46	-53.13	0.30257	0.16425
		2	16.7	-53	0	-2.87	-10.4	275.962	-64.12	-46.51	70.83	-53.41	0.04002	0.11488
2019-04-04	4363 10K CEP	1	14.8	-68	0	-2.69	-8.5	316.471	-70.1	-46.91	86.7	-56.37	0.22894	0.18737
2019-04-26	4383 10K CEP	1	15.7	-70	0	-1.98	-8.5	232.941	-55.97	-43.79	71.44	-51.76	0.18171	0.32652
		2	15.2	-63	-5	-4.61	-9.2	501.087	-65.03	-52	66.71	-56.09	0.07457	0.1663
		3	15.9	-45	-40	-9.49	-8.5	1116.47	-64.79	-41.29	64.61	-48.28	0.28188	0.35842
2019-04-28	4384 10K CEP	1	14.7	-80	50	-7.35	-8.5	864.706	-74.98	-46.26	91.98	-55.79	0.52671	0.21361
2019-05-02	#49tdt	cortex L5/6 1	19.8	-63	0			#DIV/0!	-60.8	-43.82	62.93	-60.88	0.19065
		2	21.7	-68	0			#DIV/0!	-66.31	-51.54	80.08
		3	21.1	-41	-45			#DIV/0!	-59.17	-51.03	60.24
2019-05-06	#59	1 (TIN)	17	?	-130			#DIV/0!	-59.94	-41.61	53.89
		2	14.9	-50	-35			#DIV/0!	-55.57	-45.38	72.11
2019-05-07	#58	1 (TIN) Striatum	20.5	-47	-66			#DIV/0!	-66	-36.8	62.07
		2 (TIN) Striatum	13.5	-52	0			#DIV/0!	-66.28	-43	78.43
		3 (TIN) Striatum	18.2	-40	-50			#DIV/0!	-64.51	-43.12	46.45
								#DIV/0!
