# Supplementary material for: Injection with Toxoplasma gondii protein affects neuron health and survival
Source: eLife. 2021 Jun 9;10:e67681. doi: 10.7554/eLife.67681 (PMC8270641; doi:10.7554/eLife.67681)
Supplement: Figure 7—source data 1. [file elife-67681-fig7-data1.xlsx]

## Sheet: PcA Total TIN
Group	Isocortex	Striatum	Pallidum	Hypothalamus	Olfactory Areas	Cortical Subplate	Thalamus	Midbrain	Hippocampal Formation	Cerebellum	Pons	Medulla	Tracts	total			Isocortex	Striatum	Pallidum	Hypothalamus	Olfactory Areas	Cortical Subplate	Thalamus	Midbrain	Hippocampal Formation	Cerebellum	Pons	Medulla	Tracts	sum average
2432 cohort 3	88	29	8	1	19	10	2	2	6	0	3	4	18	190
2445	65	6	1	1	2	1	15	1	350	2	2	2	21	469		cohort 1	84.4167	56.0833	9.83333	21.8333	24.8333	7.16667	23.1667	14.8333	20.75	7.83333	9.33333	6.91667	30.0833	317.083
2459	213	29	3	13	33	7	15	16	24	16	22	25	43	459
2465 values excluded																cohort 3	107.5	18.25	3	4.25	14.25	10.5	8.5	9.25	99.25	5.25	6.75	7.75	21.75	316.25
2471	64	9	0	2	3	24	2	18	17	3	0	0	5	147
4139 cohort 5	29	6	2	0	1	0	1	3	2	2	5	5	8	64		cohort 4	101.2	21.8	1	13	15.4	3.8	14.2	71.6	8.6	25.6	17	23.8	45	362
4140	16	8	1	1	2	0	1	4	7	2	1	0	6	49
4141	391	165	3	7	24	3	33	13	11	11	55	7	31	754		cohort 5	85.7778	23.7778	1.22222	3	10.4444	0.333333	10.6667	10.7778	3.66667	16.4444	11.5556	5.88889	13.4444	181.545
4143	7	6	2	1	16	0	6	7	4	23	11	24	9	116
4147	24	5	1	1	0	0	2	16	3	2	2	0	2	58
4148	67	9	0	5	6	0	20	6	2	1	6	0	15	137
4149	17	2	0	11	4	0	29	3	0	0	1	0	9	76
4152	36	7	0	0	3	0	0	2	2	0	6	2	5	63
4158	185	6	2	1	38	0	4	43	2	107	17	15	36	456
4150	41	4	0	3	15	1	27	2	17	8	0	6	10	134
4151	9	14	4	4	0	0	25	3	7	0	9	2	13	90
1760 cohort 1	24	4	0	1	0	0	0	0	3	0	0	0	2	34
1761	19	9	9	2	0	0	2	5	3	0	2	3	3	57
1779	44	45	1	1	23	1	1	2	1	10	1	0	6	136
1780	115	107	10	11	72	22	53	20	18	15	5	1	29	478
1789	77	17	8	2	6	2	3	6	3	0	1	0	6	131
1790	6	103	1	0	9	3	2	0	11	5	6	9	9	164
1794	114	82	3	2	33	12	7	10	18	1	2	5	17	306
1798	44	7	4	3	9	5	4	11	5	2	0	1	8	103
1799	39	16	15	5	16	1	23	18	18	7	8	4	23	193
1800	71	13	1	5	6	3	6	4	39	5	2	1	19	175
1815	117	40	9	21	52	18	55	41	60	6	13	11	55	498
1816	343	230	57	209	72	19	122	61	70	43	72	48	184	1530
2754 cohort 4	78	15	0	16	38	4	14	57	13	6	6	4	42	293
2755	113	42	3	27	18	9	20	9	9	46	46	53	68	463
2756	30	6	0	5	3	2	6	0	3	5	1	13	7	81
2757	202	33	0	4	16	4	5	15	17	12	6	8	26	348
2758	83	13	2	13	2	0	26	277	1	59	26	41	82	625

## Sheet: PcA Area
Group	Isocortex	Striatum	Pallidum	Hypothalamus	Olfactory Areas	Cortical Subplate	Thalamus	Midbrain	Hippocampal Formation	Cerebellum	Pons	Medulla	Tracts				Isocortex	Striatum	Pallidum	Hypothalamus	Olfactory Areas	Cortical Subplate	Thalamus	Midbrain	Hippocampal Formation	Cerebellum	Pons	Medulla	Tracts
2432	2.09142	1.82705	2.02002	0.176184	1.00828	2.80926	0.242018	0.136958	0.463354	0	0.467781	0.355421	0.706659
2445	0.625825	0.153138	0.102293	0.0713754	0.0429969	0.113808	0.735341	0.027742	10.9499	0.0384807	0.126337	0.0719935	0.333993			cohort 1	1.54069	2.30614	1.76204	1.05737	0.743026	1.09236	1.13763	0.615706	1.05837	0.197828	0.567089	0.303253	0.56478
2459	2.09546	0.756294	0.313565	0.948095	0.724906	0.814014	0.751362	0.453543	0.767209	0.314552	1.41999	0.919525	0.69879
2465	1.6127	3.42009	0	0	0.720199	0	0	3.71743	0	0	0	0	0			cohort 3	1.67827	1.37789	0.487175	0.33022	0.54043	2.49031	0.408307	1.18577	2.77547	0.107438	0.402821	0.269388	0.398631
2471	1.96596	0.732876	0	0.455443	0.205771	8.71445	0.312812	1.59318	1.69686	0.184158	0	0	0.253714
4139 cohort 5	2.04612	1.12222	1.49923	0	0.157543	0	0.359245	0.609891	0.458527	0.281991	2.31454	1.31894	0.932397			cohort 4	1.43948	0.793893	0.0928754	1.3855	0.513786	0.739535	1.01632	1.82227	0.443986	0.560267	1.13182	1.27363	0.869062
4140	1.47447	1.95434	0.979091	0.683164	0.411542	0	0.469218	1.06212	2.09612	0.368315	0.604615	0	0.913369
4141	2.34163	2.6195	0.190884	0.310776	0.320937	0.212371	1.00627	0.224328	0.21406	0.131646	2.16106	0.156734	0.306677			cohort 5	1.7371	1.10401	0.503772	0.888875	0.508152	0.0235968	1.79423	0.999346	0.530886	0.562842	1.61383	0.673322	0.652143
4143	0.272491	0.619154	0.827163	0.288578	1.39073	0	1.18922	0.785147	0.505961	1.78919	2.80937	3.49293	0.578729
4147	1.86851	1.03192	0.827163	0.577156	0	0	0.792816	3.58924	0.758941	0.311163	1.02159	0	0.257213
4148	2.20834	0.786371	0	1.22172	0.441582	0	3.35645	0.569825	0.214202	0.065867	1.29749	0	0.816699
4149	1.01006	0.315008	0	4.84507	0.530673	0	8.77314	0.513592	0	0	0.389817	0	0.883324
4152	2.58033	1.33004	0	0	0.480132	0	0	0.413048	0.465805	0	2.82153	0.535952	0.591998
4158	1.83197	0.157504	0.210419	0.07341	0.840232	0	0.201681	1.22691	0.064355	2.11741	1.10448	0.555345	0.588883
1760	3.18746	1.40827	0	0.98456	0	0	0	0	1.29466	0	0	0	0.438775
1761	1.50519	1.89005	7.57507	1.17456	0	0	0.806726	1.14132	0.772256	0	1.03951	0.888552	0.392588
1779	1.46092	3.96077	0.352761	0.24614	1.70518	0.392471	0.169056	0.191338	0.107889	0.663509	0.217839	0	0.329081
1780	1.08638	2.67955	1.00367	0.770346	1.51875	2.45664	2.54929	0.544394	0.552535	0.283171	0.309897	0.035319	0.452544
1789	2.65419	1.5534	2.9298	0.511069	0.461807	0.814901	0.526527	0.595924	0.33602	0	0.226154	0	0.341642
1790	0.165204	7.51794	0.292533	0	0.553323	0.976391	0.280386	0	0.984156	0.275114	1.08388	0.926478	0.409345
1794	1.68227	3.20773	0.470347	0.218791	1.08736	2.09318	0.525953	0.425196	0.86311	0.0294893	0.193635	0.275858	0.414399
1798	1.92898	0.813516	1.86312	0.975001	0.88102	2.59107	0.892881	1.38953	0.712275	0.175218	0	0.163908	0.579354
1799	0.912473	0.992358	3.72866	0.867229	0.835878	0.27656	2.73994	1.21346	1.36845	0.327285	1.22803	0.349896	0.888918
1800	1.83203	0.889223	0.274145	0.95643	0.345695	0.915018	0.788286	0.297394	3.26995	0.257821	0.338584	0.0964713	0.809854
1815	1.06089	0.961471	0.867026	1.4116	1.05282	1.92925	2.53924	1.07119	1.76782	0.10872	0.773373	0.372906	0.823805
1816	1.01231	1.79946	1.78732	4.57273	0.474484	0.66284	1.83332	0.51874	0.671308	0.253608	1.39417	0.529646	0.897052
cohort 4	1.2021	0.612815	0	1.82799	1.30766	0.728683	1.09858	2.53115	0.651015	0.184786	0.606678	0.230478	1.06923
	1.10207	1.08586	0.310856	1.95211	0.391987	1.03755	0.993161	0.252914	0.285218	0.896525	2.94342	1.93255	1.09552
	1.67243	0.88669	0	2.06636	0.373436	1.31793	1.70309	0	0.54344	0.55702	0.365755	2.70953	0.64462
	2.62111	1.13512	0	0.384771	0.463576	0.613518	0.33034	0.560819	0.716778	0.311163	0.510795	0.388103	0.557295
	0.599668	0.248983	0.153521	0.696281	0.032265	0	0.956454	5.76648	0.023477	0.851839	1.23245	1.10749	0.978644

## Sheet: CEP Total TIN
Group	Isocortex	Striatum	Pallidum	Hypothalamus	Olfactory Areas	Cortical Subplate	Thalamus	Midbrain	Hippocampal Formation	Cerebellum	Pons	Medulla	Tracts	total		Isocortex	Striatum	Pallidum	Hypothalamus	Olfactory Areas	Cortical Subplate	Thalamus	Midbrain	Hippocampal Formation	Cerebellum	Pons	Medulla	Tracts	total average
2427
2434	29	11	1	2	4	0	12	6	7	8	1	0	15	96	cohort 1	2343	403	78.5	55.5	168	52.5	40.5	67	112.5	406.5	33	88.5	214	4062.5
2440	132	33	0	1	4	0	0	0	7	0	0	0	6	183
2446	27	7	0	0	3	1	7	0	3	1	0	0	2	51	cohort 3	102.2	15	0.2	0.6	2.4	0.6	4.4	2	6.4	2.6	0.6	1.8	8	146.8
2447	187	6	0	0	1	1	3	4	0	2	1	1	11	217
2466															cohort 4	154.714	18.4286	2.71429	1.14286	6.57143	1.42857	5.57143	8.14286	9.14286	7	3.28571	5	8.14286	231.286
2470	136	18	0	0	0	1	0	0	15	2	1	8	6	187
4126 cohort5	27	5	1	0	3	0	2	3	2	5	3	15	12	78	cohort 5	148.636	19.6364	2.09091	2.81818	19.5455	0.727273	14.5455	17.7273	15	16	13.4545	30.7273	27.4545	328.364
4127	13	4	1	1	4	0	0	7	4	1	12	7	16	70
4128	202	17	0	0	7	2	0	22	2	1	0	1	18	272
4129	128	19	0	0	13	1	90	17	10	21	11	58	47	415
4131	94	47	1	9	10	4	25	21	73	12	62	7	70	435
4132	375	38	5	4	8	0	15	11	12	19	11	3	28	529
4133	157	62	3	3	92	0	2	21	20	17	24	229	59	689
4135	106	3	9	2	5	1	5	35	9	12	4	4	12	207
4144	324	10	0	5	49	0	2	43	8	21	10	8	14	494
4146	77	3	0	7	8	0	6	1	10	1	1	3	6	123
4157	132	8	3	0	16	0	13	14	15	66	10	3	20	300
cohort 1	3245	635	46	29	289	79	58	93	117	787	52	155	302	5887
cohort 1	1441	171	111	82	47	26	23	41	108	26	14	22	126	2238
cohort 4	273	10	2	1	5	0	4	33	34	34	0	13	13	422
	371	13	2	3	13	2	11	10	5	8	12	12	18	480
	222	79	3	0	19	6	2	4	10	3	3	4	11	366
	45	2	2	1	0	0	8	2	6	0	3	4	7	80
	110	17	9	0	3	0	11	4	6	1	4	1	6	172
	30	5	0	2	1	0	1	1	2	2	1	1	1	47
	32	3	1	1	5	2	2	3	1	1	0	0	1	52
														14090

## Sheet: CEP Area
Group	Isocortex	Striatum	Pallidum	Hypothalamus	Olfactory Areas	Cortical Subplate	Thalamus	Midbrain	Hippocampal Formation	Cerebellum	Pons	Medulla	Tracts			Isocortex	Striatum	Pallidum	Hypothalamus	Olfactory Areas	Cortical Subplate	Thalamus	Midbrain	Hippocampal Formation	Cerebellum	Pons	Medulla	Tracts
2427 cohort 3	4.01384	0	0	0	0	0	0	0	1.63032	0	0	0	0
2434	1.36408	1.3716	0.499744	0.697397	0.420116	0	2.87396	0.813188	1.0699	0.751977	0.308605	0	1.1655		cohort 1	2.85594	1.18469	1.40092	0.706158	0.384718	0.713561	0.245752	0.234972	0.518317	0.160356	0.240086	0.333389	0.425544
2440	3.25713	2.15858	0	0.182924	0.220389	0	0	0	0.561257	0	0	0	0.244563
2446	2.3906	1.64298	0	0	0.593105	1.04659	3.15572	0	0.86311	0.176936	0	0	0.292517		cohort 3	2.60014	0.950909	0.071392	0.12576	0.182868	0.225428	0.906791	0.150432	2.85349	0.15837	0.0786003	0.114292	0.331432
2447	3.8913	0.330976	0	0	0.0464644	0.245973	0.317857	0.239834	0	0.083168	0.083168	0.0777995	0.378115
2466	0	0	0	0	0	0	0	0	14.6729	0	0	0	0		cohort 4	2.92557	0.951612	0.781643	0.397387	0.326522	0.450049	0.861627	0.452788	0.621681	0.125803	0.396754	0.352971	0.281082
2470	3.28405	1.15222	0	0	0	0.285433	0	0	1.17697	0.0965104	0.158428	0.722245	0.239332
4126 cohort5	1.67014	0.819884	0.657198	0	0.414361	0	0.629909	0.534699	0.401996	0	1.21751	3.469	1.22617		cohort 5	2.08861	0.64781	0.434889	0.376091	0.53173	0.115432	0.966924	0.808371	0.716596	0.260854	1.05373	1.34307	0.737732
4127	0.838606	0.684018	0.685363	0.478215	0.576159	0	0	1.3011	0.83845	0.12891	5.07876	1.68825	1.70495
4128	3.35347	0.748145	0	0	0.259483	0.392471	0	1.05236	0.107889	0.033175	0	0.062068	0.493622
4129	1.39275	0.548038	0	0	0.315846	0.128617	4.98615	0.532981	0.353563	0.456622	0.785271	2.35948	0.844775
4131	0.975778	1.29334	0.110288	0.692587	0.231788	0.490814	1.32136	0.628118	2.46234	0.24893	0.24893	0.271672	1.20033
4132	3.20102	0.859871	0.453454	0.253119	0.152481	0	0.651938	0.27055	0.332844	0.324103	0.616044	0.095742	0.394815
4133	1.02895	1.07715	0.208892	0.145755	1.34632	0	0.066739	0.396562	0.425918	0.222646	1.03197	5.61116	0.63874
4135	2.31232	0.173483	2.08589	0.32343	0.243545	0.257855	0.555355	2.19993	0.637951	0.523114	0.572485	0.326232	0.432416
4144	2.96163	0.242314	0	0.338816	1.00011	0	0.093084	1.13254	0.237617	0.3836	0.599719	0.273401	0.211394
4146	2.82682	0.291959	0	1.90508	0.655791	0	1.12155	0.105781	1.19292	0.073364	0.240863	0.411768	0.363862
4157	2.41318	0.387702	0.582698	0	0.653136	0	1.21009	0.737466	0.891065	0.474933	1.19944	0.20505	0.603982
cohort 1	2.80441	1.45477	0.422367	0.185795	0.557689	0.807025	0.255219	0.231583	0.32856	0.215879	0.294844	0.50082	0.431133
cohort 1	2.90748	0.914622	2.37948	1.22652	0.211747	0.620097	0.236286	0.238361	0.708074	0.104833	0.185329	0.165958	0.419954
cohort 4	3.1609	0.306931	0.246028	0.085833	0.129266	0	0.235812	1.10093	1.27917	0.046276	0	0.562749	0.248639
	3.49016	0.324196	0.199898	0.209219	0.273075	0.2224	0.526893	0.271063	0.152842	0.150395	0.740653	0.422062	0.279719
	2.73895	2.58376	0.393241	0	0.523423	0.875017	0.125638	0.142197	0.400898	0.073965	0.242837	0.184508	0.224183
	2.54001	0.299258	1.19939	0.418438	0	0	2.29917	0.325275	1.10047	0	1.11098	0.844124	0.652678
	2.88786	1.18311	2.51034	0	0.175862	0	1.4704	0.302582	0.511844	0.052464	0.052464	0.098154	0.260204
	2.88228	1.27344	0	1.42447	0.214527	0	0.489185	0.27683	0.624377	0.383988	0.630343	0.359202	0.158706
	2.77881	0.690595	0.922605	0.643751	0.969498	2.05292	0.884295	0.750635	0.282171	0.173533	0	0	0.143446

## Sheet: 8wpi PcA Total TIN
Animal #	TIN total
1450	6
1453	91
1488	22
1489	17
1490	3
1492	34

## Sheet: 8wpi CEP Total TIN
Animal#	TIN Total
1454	26
1460	95
1461	83
1480	20
1482	38
1483	8
1484	22
1485	14
1491	10

## Sheet: 16wpi PcA Total TIN
Animal #	TIN Total
2429	22
2435	46
2436	17
2443	8
2454	14
2456	14
2464	16

## Sheet: 16wpi CEP Total TIN
Animal #	TIN Total
2428	30
2431	31
2442	156
2444	55
2450	22
2458	406
2460	46

## Sheet: PcA Cortical regions TIN total
Animal	MO	SS	VIS
1760	3	10	11
1761	4	0	10
1779	6	35	2
1780	10	31	35
1789	17	28	25
1790	6	0	0
1794	30	30	35
1798	7	11	15
1799	12	5	1
1800	10	44	3
1815	18	12	56
1816	121	64	88
2432	56	21	9
2445	14	11	22
2459	81	40	27
2465*	0*	5*	0*
2467*	0*	0*	0*
2471	23	26	4
2754	10	25	16
2755	61	9	20
2756	4	17	1
2757	36	54	56
2758	67	7	2
4139	10	18	1
4140	4	4	2
4141	118	135	119
4143	2	2	1
4147	4	18	0
4148	41	14	4
4149	6	10	0
4152	2	31	3
4158	97	45	19
4150	1	13	7
4151	2	2	2

## Sheet: PcA Cortical regions Area
Animal	MO	SS	VIS
1760	1.4804	4.72654	9.98368
1761	1.17739	0	5.4138
1779	0.740198	4.13572	0.453804
1780	0.351	1.04221	2.25952
1789	2.17727	3.43486	5.88905
1790	0.613823	0	0
1794	1.64488	1.57551	3.52958
1798	1.14024	1.71624	4.49398
1799	1.04318	0.416327	0.159889
1800	0.958733	4.04052	0.529005
1815	0.606427	0.387235	3.47005
1816	1.32687	0.672219	1.77488
2432	4.94504	1.77618	1.46172
2445	0.50083	0.376914	1.44753
2459	2.96079	1.40046	1.81522
2465*	0	5.73937	0
2467*
2471	2.6251	2.84235	0.839691
2754	0.572622	1.37118	1.68511
2755	2.21047	0.31238	1.33299
2756	0.828534	3.37277	0.380971
2757	1.73564	2.49366	4.96576
2758	1.79858	0.179987	0.098748
4139	2.62153	4.51975	0.482166
4140	1.36962	1.31186	1.25954
4141	2.62571	2.8773	4.87026
4143	0.289273	0.277073	0.266023
4147	1.15709	4.98732	0
4148	5.0211	1.64221	0.900982
4149	1.32456	2.1145	0
4152	0.532629	7.90758	1.46946
4158	3.56897	1.58588	1.28578
4150	0.125208	1.55905	1.61202
4151	0.37284	0.357116	0.685748

[truncated: 2 more sheets: CEP Cortical regions TIN total, CEP Cortical regions Area]
