# Supplementary material for: Injection with Toxoplasma gondii protein affects neuron health and survival
Source: eLife. 2021 Jun 9;10:e67681. doi: 10.7554/eLife.67681 (PMC8270641; doi:10.7554/eLife.67681)
Supplement: Supplementary file 2. [file elife-67681-supp2.xlsx]

## Sheet: II-Cre
	Isocortex	Striatum	Pallidum	Hypothalamus	Cortical Subplate	Thalamus	Midbrain	Hippocampal Formation	Cerebellum	Pons	Medulla	Tracts
Theoretical mean	1	1	1	1	1	1	1	1	1	1	1	1
Actual mean	1.407	1.296	0.8819	0.7651	0.8833	1.309	0.797	1.039	0.6281	0.9269	0.5567	0.6282
Number of values	29	29	29	29	29	29	29	29	29	29	29	29
One sample t test
t, df	t=3.382, df=28	t=1.327, df=28	t=0.4463, df=28	t=1.444, df=28	t=0.3989, df=28	t=0.9112, df=28	t=1.024, df=28	t=0.1243, df=28	t=2.539, df=28	t=0.4517, df=28	t=2.992, df=28	t=8.668, df=28
P value (two tailed)	0.0021	0.1951	0.6588	0.1598	0.693	0.37	0.3148	0.9019	0.017	0.6549	0.0057	<0.0001
P value summary	**	ns	ns	ns	ns	ns	ns	ns	*	ns	**	****
Significant (alpha=0.05)?	Yes	No	No	No	No	No	No	No	Yes	No	Yes	Yes
How big is the discrepancy?
Discrepancy	0.4069	0.2956	-0.1181	-0.2349	-0.1167	0.3086	-0.203	0.03935	-0.3719	-0.0731	-0.4433	-0.3718
SD of discrepancy	0.648	1.199	1.425	0.8758	1.576	1.824	1.068	1.704	0.7889	0.8714	0.798	0.231
SEM of discrepancy	0.1203	0.2227	0.2647	0.1626	0.2926	0.3387	0.1983	0.3165	0.1465	0.1618	0.1482	0.0429
95% confidence interval	0.1604 to 0.6534	-0.1606 to 0.7518	-0.6603 to 0.4241	-0.5680 to 0.09826	-0.7161 to 0.4827	-0.3852 to 1.002	-0.6093 to 0.2032	-0.6089 to 0.6877	-0.6720 to -0.07188	-0.4046 to 0.2584	-0.7469 to -0.1398	-0.4597 to -0.2840
R squared (partial eta squared)	0.29	0.0592	0.007062	0.06933	0.00565	0.0288	0.03607	0.0005519	0.1872	0.007235	0.2422	0.7285

## Sheet: III-Cre
	Isocortex	Striatum	Pallidum	Hypothalamus	Cortical Subplate	Thalamus	Midbrain	Hippocampal Formation	Cerebellum	Pons	Medulla	Tracts
Theoretical mean	1	1	1	1	1	1	1	1	1	1	1	1
Actual mean	2.232	0.7953	0.4158	0.3053	0.2375	0.8917	0.5121	0.6155	0.3127	0.5954	0.7219	0.483
Number of values	23	23	23	23	23	23	23	23	23	23	23	23
One sample t test
t, df	t=7.749, df=22	t=1.727, df=22	t=4.756, df=22	t=7.594, df=22	t=8.047, df=22	t=0.4659, df=22	t=4.995, df=22	t=3.906, df=22	t=11.10, df=22	t=2.038, df=22	t=1.028, df=22	t=6.582, df=22
P value (two tailed)	<0.0001	0.0981	<0.0001	<0.0001	<0.0001	0.6459	<0.0001	0.0008	<0.0001	0.0538	0.315	<0.0001
P value summary	****	ns	****	****	****	ns	****	***	****	ns	ns	****
Significant (alpha=0.05)?	Yes	No	Yes	Yes	Yes	No	Yes	Yes	Yes	No	No	Yes
How big is the discrepancy?
Discrepancy	1.232	-0.2047	-0.5842	-0.6947	-0.7625	-0.1083	-0.4879	-0.3845	-0.6873	-0.4046	-0.2781	-0.517
SD of discrepancy	0.7624	0.5683	0.5891	0.4387	0.4544	1.115	0.4685	0.4721	0.297	0.952	1.297	0.3767
SEM of discrepancy	0.159	0.1185	0.1228	0.09148	0.09476	0.2325	0.09769	0.09844	0.06192	0.1985	0.2704	0.07855
95% confidence interval	0.9022 to 1.562	-0.4505 to 0.04105	-0.8390 to -0.3295	-0.8844 to -0.5050	-0.9591 to -0.5660	-0.5905 to 0.3739	-0.6905 to -0.2853	-0.5886 to -0.1803	-0.8157 to -0.5589	-0.8162 to 0.007123	-0.8389 to 0.2827	-0.6800 to -0.3541
R squared (partial eta squared)	0.7319	0.1194	0.507	0.7239	0.7464	0.00977	0.5314	0.4095	0.8485	0.1588	0.04586	0.6632
